# Supplementary material
Source: PubMed Central journal article supplement (PMC5084078)
Supplement: oc6b00214_si_001.pdf [file oc6b00214_si_001.pdf]

## Supporting Information for

### Late stage azidation of complex molecules

Rashad R. Karimov, Ankit Sharma and John F. Hartwig\*

*Department of Chemistry, University of California, Berkeley, California  
94720*

|                                                                  |     |
|------------------------------------------------------------------|-----|
| A. General Experimental Details .....                            | 2   |
| B. Synthesis of the starting materials .....                     | 3   |
| C. C-H azidation of complex molecules .....                      | 11  |
| D. Trifluoromethylazidation of olefins in natural products ..... | 26  |
| E. Azidation of the cholesterol scaffold .....                   | 31  |
| F. Derivatization of azides .....                                | 33  |
| G. References .....                                              | 39  |
| H. NMR Spectra .....                                             | 41  |
| I. X-ray structures .....                                        | 118 |

## A. General Experimental Details

All air-sensitive manipulations were conducted in a nitrogen-filled glovebox or by standard Schlenk techniques under nitrogen. All glassware were heated in an oven and cooled under an inert atmosphere prior to use. NMR spectra were acquired on 300, 400 MHz, 500 MHz, 600 MHz or 900 MHz Bruker instruments at the University of California, Berkeley. NMR spectra were processed with MestReNova 9.0 (Mestrelab Research SL). Chemical shifts are reported in ppm and referenced to residual solvent peaks ( $\text{CHCl}_3$  in  $\text{CDCl}_3$ : 7.26 ppm for  $^1\text{H}$  and 77.16 ppm for  $^{13}\text{C}$ , Pyridine- $d_4\text{H}$  in pyridine- $d_5$  8.74 for  $^1\text{H}$  and 149.65 for  $^{13}\text{C}$ , acetone- $d_5\text{H}$  in acetone- $d_6$ : 2.05 ppm for  $^1\text{H}$  and 29.84 for  $^{13}\text{C}$ ). Coupling constants are reported in hertz. Flash column chromatography was performed with Silicycle SiliaFlash T60 TLC-grade silica gel. Products were visualized on TLC plates using a  $\text{KMnO}_4$  stain or a CAM stain. GC analyses were obtained on an Agilent 6890 GC equipped with an HP- 5 column (25 m x 0.20 mm ID x 0.33 m film) and an FID detector. Preparative LC-MS purifications were carried out on Waters Acquity Ultra Performance LC with SQ mass detector with an xBridge C18 column (19 x 250 mm, 10  $\mu\text{m}$ , 30 mL/min flow rate). High-resolution mass spectra were obtained via the Micro-Mass/Analytical Facility operated by the College of Chemistry, University of California, Berkeley. X-ray crystal structures were obtained via X-ray Crystallography Facility operated by the College of Chemistry, University of California, Berkeley.

Substrates (natural products and active pharmaceutical ingredients), *i*-PrPyBox (**L1**) and  $\text{Fe}(\text{OAc})_2$  were purchased from commercial sources and used without further purification unless mentioned otherwise. Acetonitrile, ethylacetate, dichloromethane (DCM) and tetrahydrofuran (THF) were degassed by purging with nitrogen for 45 minutes and dried with a solvent purification system containing a one-meter column of activated alumina. Iodine (III) azide reagent (**1**) was prepared according to reported procedures<sup>1,2</sup> and Togni's reagent (**5**) was purchased from commercial sources.

**CAUTION:** Azides are known to be potentially explosive compounds. As shown in equation below, azides with C/N ratio more than 3 are stable enough to be handled with proper safety measures.<sup>3,4</sup>

$$(\text{N}_c + \text{N}_o) / \text{N}_n \geq 3$$

$\text{N}_c$  = Number of carbon atom  
 $\text{N}_o$  = Number of other atom about the same size  
 $\text{N}_n$  = Number of nitrogen atoms

Azides with a C/N ratio greater than one and no more than 3 can be synthesized and isolated but should be stored below room temperature at no more than 1.0 M concentration and at a maximum of 5 grams of material. Organic azides with C/N less than 1 should never be isolated.<sup>3,4</sup> In general, aliphatic azides are more stable than olefinic, aromatic or carbonyl azides. All azidation reactions and subsequent workups were performed behind a blast shield with the sash positioned as low as possible. Once isolated, organic azides were stored in a freezer and away from sources of heat, light, pressure and shock. While we did not encounter any issues during their synthesis, proper precautions were taken.

### B. Synthesis of the starting materials.

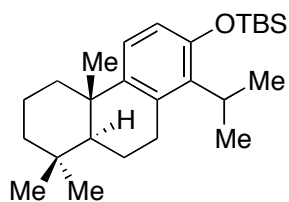

**Totarol TBS ether S1:** Totarol (100 mg, 0.349 mmol, 1 equiv) was dissolved in CH<sub>2</sub>Cl<sub>2</sub> (2 mL) and cooled to 0 °C in an ice/water bath. Pyridine (282 ml, 3.49 mmol, 10 equiv) followed by TBSOTf (113 μL, 0.524 mmol, 1.5 equiv) was added. After stirring at this temperature for 30 min, the reaction mixture was diluted with diethyl ether (50 mL) and washed with a saturated solution of NaHCO<sub>3</sub> (30 mL). The ether layer was dried over MgSO<sub>4</sub>, filtered and concentrated. The crude material was purified by flash column chromatography (hexanes) to give **S1** in 58% yield (81.5 mg). At ambient temperature **S1** exists as a mixture of two rotomers. <sup>1</sup>H and <sup>13</sup>C NMR spectra was recorded at 75 °C. <sup>1</sup>H NMR (600 MHz, C<sub>6</sub>D<sub>6</sub>) δ 7.00 (d, *J* = 8.7 Hz, 1H), 6.76 (d, *J* = 8.7 Hz, 1H), 3.49 (bs, 1H), 2.94 (dd, *J* = 17.0, 7.3, 1H), 2.76 (ddd, *J* = 17.7, 11.0, 7.9 Hz, 1H), 2.19 (d, *J* = 12.8, 1H), 1.83 (m, 1H), 1.74 – 1.58 (m, 2H), 1.52 (dp, *J* = 14.1, 3.6 Hz, 1H), 1.46 (d, *J* = 0.85 Hz, 3H), 1.45 (d, *J* = 0.86 Hz, 3H), 1.42 (dt, *J* = 13.4, 3.3, 1H), 1.35 (td, *J* = 13.1, 3.9 Hz, 1H), 1.26 (dd, *J* = 12.6, 2.5 Hz, 1H), 1.19 (s, 3H), 1.15 (td, *J* = 13.4, 4.1 Hz, 1H), 1.06 (s, 9H), 0.92 (s, 3H), 0.91 (s, 3H), 0.26 (s, 6H); <sup>13</sup>C NMR (151 MHz, C<sub>6</sub>D<sub>6</sub>) δ 152.34, 143.86, 135.11, 134.53, 122.95, 117.12, 50.22, 42.22, 40.21, 38.28, 33.54, 33.39, 29.29, 27.58, 26.60, 25.30, 21.85, 21.05, 21.00, 20.11, 19.99, 18.97, -3.30, -3.36; **EIHR** calc'd 400.3161, found 400.3167.

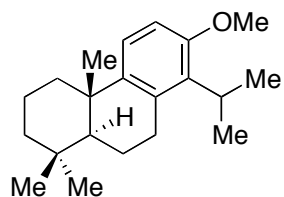

**Totarol methyl ether S2:** Totarol (100 mg, 0.349 mmol, 1 equiv) was dissolved in DMF (2 mL).  $K_2CO_3$  (96.5 mg, 0.698 mmol, 2 equiv), followed by MeI (33.0  $\mu$ l, 0.524 mmol, 1.5 equiv), was added. After stirring at ambient temperature for 16 hours, the reaction mixture was

diluted with diethyl ether (50 mL) and washed with saturated solution of  $NaHCO_3$  (30 mL). The ether layer was dried over  $MgSO_4$ , filtered and concentrated. The crude material was purified by flash column chromatography (hexanes:EtOAc 98:2) to give **S2** in 52% yield (54.7 mg).  $^1H$  NMR (600 MHz,  $CDCl_3$ )  $\delta$  7.13 (d,  $J = 8.8$  Hz, 1H), 6.74 (d,  $J = 8.8$  Hz, 1H), 3.79 (s, 3H), 3.28 (bs, 1H), 2.98 (dd,  $J = 17.1, 6.6$  Hz, 1H), 2.79 (ddd,  $J = 17.8, 11.4, 8.0$  Hz, 1H), 2.28 (d,  $J = 12.9$ , 1H), 1.94 (dd,  $J = 11.6, 8.0$ , 1H), 1.82 – 1.64 (m, 2H), 1.62 (dp,  $J = 14.1, 3.6$  Hz, 1H), 1.49 (dt,  $J = 13.2, 3.4$ , 1H), 1.39 (td,  $J = 13.1, 3.7$  Hz, 1H), 1.28-1.35 (m, 2H), 1.33 (d,  $J = 7.1$  Hz, 3H), 1.31 (d,  $J = 7.0$  Hz, 3H), 1.26 – 1.22 (m, 1H), 1.22 (s, 3H), 0.97 (s, 3H), 0.95 (s, 3H);  $^{13}C$  NMR (151 MHz,  $CDCl_3$ )  $\delta$  156.49, 143.21, 133.51, 122.84, 120.26, 109.62, 55.15, 49.73, 41.78, 39.81, 37.85, 33.44, 33.40, 28.89, 27.71, 25.36, 21.76, 20.56 (2 overlapping resonances), 19.67, 19.59; **EIHR** calc'd 300.2453, found 300.2452.

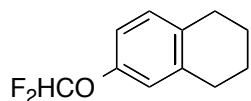

**6-(difluoromethoxy)-1,2,3,4-tetrahydronaphthalene S3:** Into a 20 mL vial was placed 5,6,7,8-tetrahydro-2-naphthol (74.0 mg, 0.5 mmol, 1 equiv) acetonitrile (1.0 mL) and 6 M aqueous KOH (1.0 mL). The mixture was stirred rapidly at room temperature, and  $HCF_2OTf$  (210  $\mu$ l, 1.5 mmol, 3 equiv) was added at once. Note: the reaction is exothermic. The mixture was stirred vigorously for 2 minutes. The reaction was diluted with  $H_2O$  (8 mL) and extracted with diethyl ether (2 x 10 mL). The combined organic layers were dried over  $MgSO_4$ , filtered and concentrated. The crude product was purified by flash column chromatography (hexanes:EtOAc 99:1) to give **S3** in 51% (51.0 mg) yield.  $^1H$  NMR (400 MHz,  $CDCl_3$ )  $\delta$  7.04 (d,  $J = 8.2$  Hz, 1H), 6.92 – 6.79 (m, 2H), 6.45 (t,  $J = 74.5$  Hz, 1H), 3.08 – 2.53 (m, 4H), 2.08 – 1.65 (m, 4H);  $^{13}C$  NMR (126 MHz,  $CDCl_3$ )  $\delta$  149.01, 138.99, 134.50, 130.40, 119.97, 117.00, 116.34 (t,  $J = 258.6$  Hz), 29.61, 28.89, 23.20, 22.97;  $^{19}F$  NMR (376 MHz,  $CDCl_3$ )  $\delta$  -79.36 (d,  $J = 74.6$  Hz); **EIHR** calc'd 198.0856, found 198.0856.

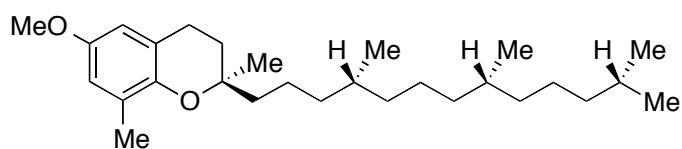

**$\delta$ -tocopherol methyl ether S4:**  $\delta$ -tocopherol (403 mg, 1.00 mmol, 1 equiv)

was dissolved in DMF (5 mL).  $K_2CO_3$  (276 mg, 2.00 mmol, 2 equiv) followed by MeI (93.0  $\mu$ L, 1.50 mmol, 1.5 equiv) was added. After stirring at ambient temperature for 16 hours, the reaction mixture was diluted with diethylether (50 mL) and washed with a saturated solution of  $NaHCO_3$  (30 mL). The ether layer was dried over  $MgSO_4$ .  $MgSO_4$  was removed by filtration, and the ether layer was concentrated. The crude material was purified by flash column chromatography (hexanes:EtOAc 97:3) to give **S4** in 91% yield (382 mg).  $^1H$  NMR (400 MHz,  $CDCl_3$ )  $\delta$  6.59 (d,  $J = 3.0$  Hz, 1H), 6.47 (d,  $J = 3.0$  Hz, 1H), 3.75 (s, 3H), 2.75 (t,  $J = 8.2$  Hz, 2H), 2.18 (s, 3H), 1.93 – 1.66 (m, 2H), 1.67 – 0.98 (m, 21H), 1.28 (s, 3H), 0.89 (m, 12H);  $^{13}C$  NMR (101 MHz,  $CDCl_3$ )  $\delta$  152.24, 146.26, 127.32, 121.06, 114.88, 111.13, 75.68, 55.73, 40.14, 39.53, 37.61 (2 overlapping resonances), 37.58, 37.44, 32.95, 32.84, 31.55, 28.14, 24.96, 24.61, 24.28, 22.88, 22.79, 21.14, 19.91, 19.82, 16.37; **EIHR** calc'd 416.3654, found 416.3659.

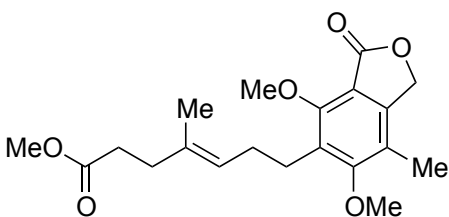

**Mycophenolic acid derivative S5:** Mycophenolic acid (160 mg, 0.500 mmol, 1 equiv) was dissolved in methanol (10 mL) at ambient temperature. A 2 M solution of  $TMSCHN_2$  in ether (1.0 mL, 1.5 mmol, 4 equiv) was added, and the reaction mixture was stirred for 24 hours.

The reaction mixture was concentrated and purified by flash column chromatography to yield methyl O-methyl mycophenolate in 87% yield. The  $^1H$  and  $^{13}C$  NMR spectral data match those of the reported molecule.<sup>5</sup>

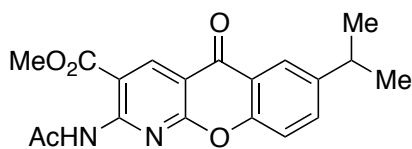

**Pyridine derivative S6:** To the solution of amlexanox (110 mg, 0.369 mmol, 1 equiv) in EtOAc (7 mL) and MeOH (2 mL) mixture was added 2 M solution of  $TMSCHN_2$  in ether (553  $\mu$ L, 1.11 mmol, 3 equiv) at ambient temperature. The reaction mixture was stirred at this temperature for 1 hour and concentrated. The crude product of this reaction was used in the next step without further purification.

To the solution of the crude product from the previous step (0.369 mmol, 1 equiv) in pyridine (2 mL) was added acetic anhydride (1 mL). The reaction was stirred for 24 hours at 80 °C. The reaction was diluted with EtOAc (75 mL) and washed once with  $NaHCO_3$  (25 mL).

The organic layer was dried over  $\text{MgSO}_4$ , concentrated, and purified by flash column chromatography (hexanes:EtOAc 80:20) to give **S6** in 52% yield (67.7 mg).  $^1\text{H NMR}$  (500 MHz,  $\text{CDCl}_3$ )  $\delta$  11.27 (s, 1H), 9.29 (s, 1H), 8.11 (d,  $J = 2.2$  Hz, 1H), 7.65 (dd,  $J = 8.6, 2.3$  Hz, 1H), 7.52 (d,  $J = 8.6$  Hz, 1H), 4.00 (s, 3H), 3.05 (hept,  $J = 6.8$  Hz, 1H), 2.55 (s, 3H), 1.31 (d,  $J = 6.9$  Hz, 6H);  $^{13}\text{C NMR}$  (126 MHz,  $\text{CDCl}_3$ )  $\delta$  176.40, 169.87, 166.43, 161.66, 155.01, 153.86, 146.32, 142.80, 134.72, 123.65, 121.45, 118.54, 111.13, 108.41, 53.17, 33.84, 26.67, 24.04; **ESIHR** (M+Na) calc'd 377.1108, found 377.1108.

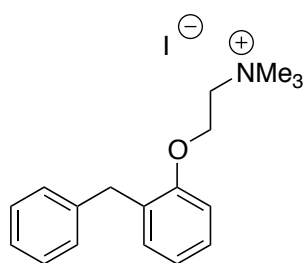

**Tetraalkylammonium iodide S7:** Phenyltoloxamine (2.55 g, 10.0 mmol, 1 equiv) was dissolved  $\text{CH}_2\text{Cl}_2$  (15 mL) and MeI (1.25 ml, 20.0 mmol, 2 equiv) was added at ambient temperature. The reaction mixture was stirred at this temperature for 24 hours and concentrated to yield tetraalkyl ammonium iodide **S7** in quantitative yield (3.97 g) as a white solid. It was used in subsequent azidation reactions without further purification.  $^1\text{H NMR}$  (500 MHz,  $\text{CDCl}_3$ )  $\delta$  7.37 – 6.75 (m, 9H), 4.44 – 4.24 (m, 2H), 4.06 – 3.85 (m, 4H), 3.22 (s, 9H);  $^{13}\text{C NMR}$  (126 MHz,  $\text{CDCl}_3$ )  $\delta$  155.20, 140.51, 131.66, 128.51, 128.26, 128.24 (2 overlapping resonances), 126.22, 122.13, 111.61, 65.33, 62.24, 54.63, 36.59; **ESIHR** (M) calc'd 270.1852, found 270.1851.

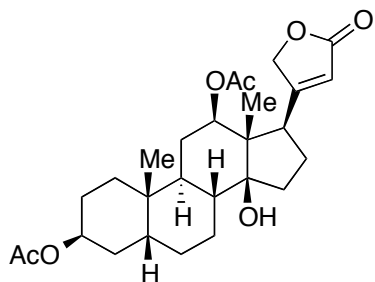

**Digoxigenin diacetate 10b:** To the solution of digoxigenin (110 mg, 0.256 mmol, 1 equiv) in pyridine (1.5 mL) was added acetic anhydride (1.0 mL). The reaction was stirred for 24 hours at ambient temperature. Excess  $\text{Ac}_2\text{O}$  and pyridine was removed under high vacuum, and the residue was purified by flash column chromatography (hexanes:EtOAc 1:1) to yield digoxigenin diacetate **10b** in 82% yield (110 mg).  $^1\text{H NMR}$  (400 MHz,  $\text{CDCl}_3$ )  $\delta$  5.79 (bs, 1H), 5.01 (bs, 1H), 4.87 (dd,  $J = 18.1, 1.8$  Hz, 1H), 4.74 (dd,  $J = 18.0, 1.8$  Hz, 1H), 4.57 (dd,  $J = 11.9, 4.0$  Hz, 1H), 2.85 (dd,  $J = 9.2, 5.8$  Hz, 1H), 2.21 (m, 1H), 2.10 (m, 1H), 2.04 (s, 3H), 1.99 (s, 3H), 1.97 – 1.07 (m, 18H), 0.91 (s, 3H), 0.84 (s, 3H);  $^{13}\text{C NMR}$  (101 MHz,  $\text{CDCl}_3$ )  $\delta$  174.60, 174.02, 170.83, 170.66, 117.78, 85.53, 77.35, 73.48, 70.21, 54.08, 45.95, 41.14, 36.80, 35.12, 33.01,

32.24, 30.43, 30.35, 27.20, 26.41, 26.24, 24.96, 23.53, 21.48, 21.43, 21.27, 10.37; **ESIHR** (M+H) calc'd 516.2705, found 516.2716.

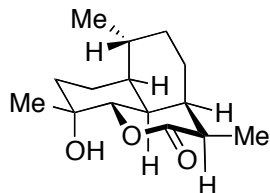

**Artemisinin acid derivative 10d:** Dihydroartemisinin acid methyl ester (100 mg, 0.399 mmol, 1 equiv) was dissolved in THF (3 mL) at ambient temperature. *N*-methylmorpholine *N*-oxide (70.2 mg, 0.599 mmol, 1.5 equiv) 2.5% solution of OsO<sub>4</sub> in *t*-BuOH (2.5 mL, 0.200 mmol, 0.5 equiv) was added, and the reaction mixture was stirred at ambient temperature for 3 days. The reaction was quenched by addition of Na<sub>2</sub>SO<sub>3</sub> (500 mg) and water (3 mL) and stirred overnight. After this time, the reaction was diluted with EtOAc (100 mL), and washed with water (3 x 30 mL). The organic layer was dried over MgSO<sub>4</sub>, filtered and concentrated. The crude product was purified by flash column chromatography (hexane:EtOAc 4:1 to 1:1) to give **10d** in 78% yield (79 mg). <sup>1</sup>H NMR (600 MHz, CDCl<sub>3</sub>) δ 4.30 (d, *J* = 11.9 Hz, 1H), 2.68 (p, *J* = 7.0 Hz, 1H), 2.36 (dt, *J* = 12.0, 4.1 Hz, 1H), 1.97 (bs, 1H), 1.92 – 1.68 (m, 4H), 1.64 (m, 2H), 1.57 (m, 1H), 1.49 – 1.39 (m, 2H), 1.32 (s, 3H), 1.24 – 1.14 (m, 1H), 1.19 (d, *J* = 7.2 Hz, 3H), 0.99 (qd, *J* = 13.1, 3.9 Hz, 1H), 0.85 (d, *J* = 6.4 Hz, 3H); <sup>13</sup>C NMR (151 MHz, CDCl<sub>3</sub>) δ 175.25, 81.09, 70.76, 43.40, 40.51, 39.43, 37.39, 35.08, 32.82, 27.57, 27.30, 22.99, 22.34, 20.10, 13.43. **ESIHR** (M+Na) calc'd 275.1617, found 275.1621.

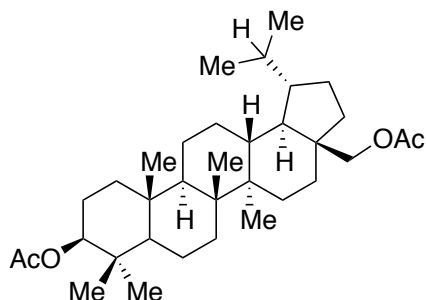

**Betulin diacetate S8:** Betulin (200 mg, 0.450 mmol, 1 equiv) was dissolved in a mixture of EtOAc and MeOH (15 mL/15 mL) in a 50 mL round-bottom flask. Pd/C (10%) (48.0 mg, 0.045 mmol, 0.1 equiv) was added, and the flask was evacuated and then backfilled with H<sub>2</sub> by attaching a balloon filled with hydrogen gas. The reaction mixture was vigorously stirred at ambient temperature for 24 hours. The reaction mixture was passed through a pad of Celite. The Celite layer was washed with EtOAc, and the combined EtOAc fractions were concentrated to obtain dihydrobetulin. The crude material was used in the next step without further purification

Dihydrobetulin was dissolved in pyridine (1.5 mL) at ambient temperature. Ac<sub>2</sub>O (0.7 mL) was added, and the reaction mixture was stirred for 24 hours. Excess pyridine and Ac<sub>2</sub>O was

removed under high vacuum, and the crude betulin diacetate was purified by flash column chromatography (hexanes:EtOAc 4:1) to give **S8** in 76% yield (180 mg).  $^1\text{H NMR}$  (500 MHz,  $\text{CDCl}_3$ )  $\delta$  4.46 (dd,  $J = 10.5, 5.8$  Hz, 1H), 4.22 (d,  $J = 11.0$  Hz, 1H), 3.80 (d,  $J = 11.0$  Hz, 1H), 2.04 (s, 3H), 2.03 (s, 3H), 1.93 – 1.52 (m, 12H), 1.51 – 1.13 (m, 12H), 1.02 (s, 3H), 0.99 – 0.96 (m, 1H), 0.93 (s, 3H), 0.85 – 0.80 (m, 12H), 0.80 – 0.76 (m, 1H), 0.75 (d,  $J = 6.7$  Hz, 3H);  $^{13}\text{C NMR}$  (126 MHz,  $\text{CDCl}_3$ )  $\delta$  171.76, 171.12, 80.98, 62.91, 55.38, 50.01, 48.16, 46.51, 44.56, 42.92, 40.98, 38.43, 37.87, 37.17, 37.09, 34.73, 34.26, 29.91, 29.52, 28.03, 26.98, 26.88, 23.77, 23.03, 21.68, 21.46, 21.20, 20.87, 18.26, 16.62, 16.21, 16.12, 15.00, 14.69. The  $^1\text{H}$  and  $^{13}\text{C}$  NMR spectral data match those of the reported molecule.<sup>6</sup>

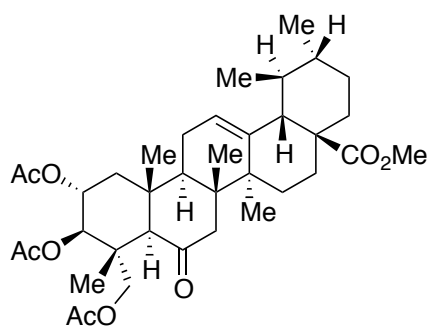

**Synthesis of madecassic acid derivative S9:** To the slurry of madecassic acid (104 mg, 0.200 mmol, 1 equiv) in a mixture of PhH (7 mL) and MeOH (2 mL) was added a 2 M solution of  $\text{TMSCHN}_2$  in ether (0.2 mL, 0.400 mmol, 2 equiv) at ambient temperature. The reaction mixture was stirred at this temperature for 30 min and concentrated. The crude product was used in the next step without further purification.

To the solution of madecassic acid methyl ester (0.200 mmol, 1 equiv) in pyridine (2 mL) was added acetic anhydride (1 mL). The reaction was stirred for 24 hours at ambient temperature. Excess  $\text{Ac}_2\text{O}$  and pyridine was removed under high vacuum, and the residue was used in the subsequent step without further purification. The crude product was used in the next step without further purification. **ESIHR** ( $\text{M}+\text{Na}$ ) calc'd 667.3816, found 667.3826.

Crude methyl madecassate triacetate (0.200 mmol, 1 equiv) was dissolved in  $\text{CH}_2\text{Cl}_2$  (10 mL).  $\text{NaHCO}_3$ , followed by Dess-Martin periodinane (127 mg, 0.300 mmol, 1.5 equiv), was added, and the reaction mixture was stirred at ambient temperature for 3 hours. A 1:1 mixture of a saturated solution of  $\text{NaHCO}_3$  (5 mL) and a 20% aqueous solution of  $\text{Na}_2\text{S}_2\text{O}_3$  (5 mL) were added to quench the reaction. The biphasic mixture was vigorously stirred for 30 min and then extracted with  $\text{CH}_2\text{Cl}_2$  (2 x 20 mL). The combined organic layers was dried over anhydrous  $\text{Na}_2\text{SO}_4$ , filtered and concentrated. Crude **S9** was purified by flash column chromatography to give **S9** in 86% yield (172 mg).  $^1\text{H NMR}$  (400 MHz,  $\text{CDCl}_3$ )  $\delta$  5.33 (t,  $J = 3.6$  Hz, 1H), 5.16 (td,



$J = 11.0, 4.8$  Hz, 1H), 4.97 (d,  $J = 10.4$  Hz, 1H), 3.94 (d,  $J = 11.6$  Hz, 1H), 3.79 (d,  $J = 11.5$  Hz, 1H), 3.61 (s, 3H), 2.68 (s, 1H), 2.52 (d,  $J = 13.1$  Hz, 1H), 2.30 (d,  $J = 11.3$  Hz, 1H), 2.24 – 2.13 (m, 2H), 2.07 (s, 3H), 2.05 (s, 3H), 2.03 – 2.10 (m, 3H), 2.00 (s, 3H), 1.95 (d,  $J = 13.1$  Hz, 1H), 1.82 – 1.47 (m, 6H), 1.41 (dd,  $J = 13.0, 11.0$  Hz, 2H), 1.34 (s, 3H), 1.22 (s, 3H), 1.14 (s, 3H), 1.10 – 0.93 (m, 2H), 0.98 (d,  $J = 6.2$  Hz, 3H), 0.90 (d,  $J = 6.4$  Hz, 3H), 0.83 (s, 3H);  $^{13}\text{C NMR}$  (101 MHz,  $\text{CDCl}_3$ )  $\delta$  210.29, 177.75, 170.58, 170.39, 170.32, 138.12, 124.73, 73.64, 69.18, 65.52, 57.38, 52.74, 51.68, 50.05, 48.04, 48.01, 46.14, 44.00, 43.29, 42.40, 40.60, 38.92, 38.87, 36.47, 30.61, 27.89, 24.01, 23.98, 23.79, 21.24, 21.10, 20.97, 20.81, 18.42, 17.59, 17.09, 14.11; **ESIHR** (M+Na) calc'd 665.3660, found 665.2692.

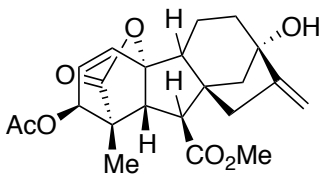

**Synthesis of gibberellic acid derivative S10:** To the solution of gibberellic acid (172 mg, 0.497 mmol, 1 equiv) in a mixture of PhH (7 mL) and MeOH (2 mL) was added a 2 M solution of  $\text{TMSCHN}_2$  in ether (0.5 mL, 1.00 mmol, 2 equiv) at ambient temperature. The

reaction mixture was stirred at this temperature for 20 min and concentrated. The crude product was used in the next step without further purification.

To the solution of gibberellic acid methyl ester (0.497 mmol, 1 equiv) in pyridine (2 mL) was added acetic anhydride (1 mL). The reaction was stirred for 24 hours at ambient temperature. At this time, the reaction was diluted with EtOAc (75mL). The resulting solution was washed with 1M solution of HCl (2 x 25 mL) and then once with  $\text{NaHCO}_3$  (25 mL). The organic solution was dried over  $\text{MgSO}_4$ , concentrated, and purified by flash column chromatography to give **S10** in 86% yield (172 mg).  $^1\text{H NMR}$  (400 MHz,  $\text{CDCl}_3$ )  $\delta$  6.42 (d,  $J = 9.4$  Hz, 1H), 5.91 (dd,  $J = 9.3, 3.8$  Hz, 1H), 5.37 (d,  $J = 3.8$  Hz, 1H), 5.32 (dd,  $J = 3.1, 1.8$  Hz, 1H), 5.01 (t,  $J = 2.1$  Hz, 1H), 3.78 (s, 3H), 3.36 (d,  $J = 10.8$  Hz, 1H), 2.81 (d,  $J = 10.8$  Hz, 1H), 2.26 (m, 1H), 2.20 (t,  $J = 3.0$  Hz, 1H), 2.16 (s, 3H), 2.14 – 2.04 (m, 2H), 2.04 – 1.64 (m, 6H), 1.18 (s, 3H);  $^{13}\text{C NMR}$  (101 MHz,  $\text{CDCl}_3$ )  $\delta$  177.26, 172.50, 170.17, 156.98, 134.32, 129.28, 107.83, 90.28, 78.27, 70.37, 53.52, 52.32, 52.23, 51.14, 50.64, 50.49, 44.85, 43.20, 38.37, 20.97, 17.10, 14.43; **ESIHR** (M+Na) calc'd 425.1571, found 425.1570.

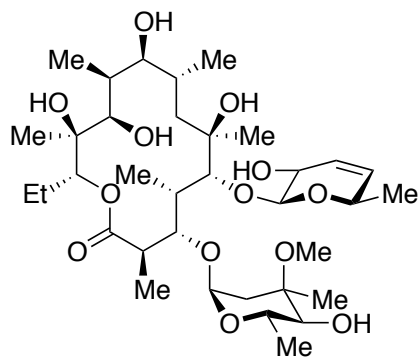

**9-(S)-hydroxy erythromycin olefin derivative S11:** 9-(S)-hydroxy erythromycin *N*-oxide<sup>7</sup> (1.30 g, 1.73 mmol, 1 equiv) was dissolved in CHCl<sub>3</sub> in a 1 L flask. The CHCl<sub>3</sub> was evaporated using a rotovap to obtain a thin layer of 9-(S)-hydroxyerythromycin covering the walls of the flask. This flask was then heated to 160 °C under vacuum (80 millitorr) for 6 hours. The flask was then cooled to room temperature,

and the product was purified by flash column chromatography (hexanes:acetone 5:1 then 4:1) to yield **S11** in 69% yield (821 mg). <sup>1</sup>H NMR (500 MHz, CDCl<sub>3</sub>) δ 5.64 (s, 2H), 5.00 (dd, *J* = 10.3, 2.6 Hz, 1H), 4.87 (d, *J* = 4.2 Hz, 1H), 4.60 (d, *J* = 6.7 Hz, 1H), 4.45 (tt, *J* = 6.8, 4.7 Hz, 1H), 4.18 (dd, *J* = 6.8, 3.0 Hz, 1H), 4.12 (dq, *J* = 9.4, 6.3 Hz, 1H), 3.94 (dd, *J* = 8.7, 4.3 Hz, 1H), 3.78 (s, 1H), 3.65 (d, *J* = 3.8 Hz, 1H), 3.43 – 3.39 (m, 1H), 3.26 (s, 3H), 3.14 (s, 1H), 3.03 (d, *J* = 9.1 Hz, 1H), 2.71 – 2.59 (m, 1H), 2.38 – 2.30 (m, 1H), 2.32 – 2.20 (m, 1H), 1.99 (dtd, *J* = 14.5, 7.6, 2.6 Hz, 1H), 1.95 – 1.85 (m, 2H), 1.75 (dd, *J* = 14.6, 7.6 Hz, 1H), 1.57 (dd, *J* = 15.2, 4.9 Hz, 1H), 1.49 (ddq, *J* = 14.4, 10.2, 7.2 Hz, 1H), 1.31 (d, *J* = 6.3 Hz, 3H), 1.29 – 1.09 (m, 6H), 1.27 (s, 3H), 1.25 (d, *J* = 5.9 Hz, 3H), 1.23 (d, *J* = 5.7 Hz, 3H), 1.22 (s, 3H), 1.16 (d, *J* = 7.1 Hz, 3H), 1.13 (s, 3H), 1.03 (t, *J* = 7.0 Hz, 6H), 0.88 (t, *J* = 7.4 Hz, 3H); <sup>13</sup>C NMR (126 MHz, CDCl<sub>3</sub>) δ 176.43, 131.44, 126.91, 104.57, 100.13, 98.27, 82.62, 80.48, 78.63, 77.58, 74.71, 73.65, 72.77, 72.04, 71.20, 68.06, 66.58, 49.49, 48.35, 41.64, 37.95, 35.09, 33.96, 32.23, 24.85, 21.99, 21.57, 21.28, 20.97, 17.87, 17.09, 16.55, 15.86, 11.20, 10.12; **ESIHR** calc'd (M+Na) 713.4082, found 713.4105.

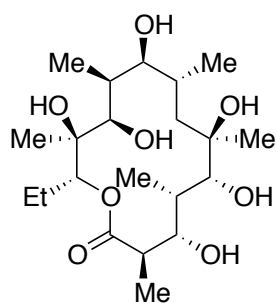

**9-(S)-hydroxyerythronolide S12:** To the solution of the olefin **S11** (821 mg, 1.20 mmol, 1 equiv) in methanol (10 mL), acetyl chloride (0.5 mL) was added slowly. The reaction mixture was stirred at ambient temperature for 15 hours, and then solid NaHCO<sub>3</sub> (1.50 g) was added to quench the reaction. The solids were removed by filtration and washed with MeOH (2 x 5 mL). The combined MeOH fractions were concentrated to obtain a white solid. The crude 9-S-hydroxyerythronolide was purified by flash column chromatography (hexanes:acetone 4:1) to yield 9-(S)-hydroxyerythronolide **S12** in 79% yield (399 mg); The <sup>1</sup>H and <sup>13</sup>C NMR spectral data match those of the reported molecule.<sup>8</sup>

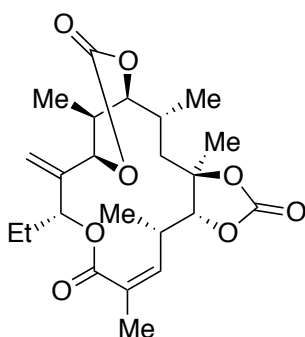

**Erythronolide bis-carbonate diene derivative S13:** 9-(S)-hydroxyerythronolide **S12** (52.0 mg, 0.124 mmol, 1 equiv) and pyridine (200  $\mu$ l, 2.47 mmol, 20 equiv) were dissolved in  $\text{CH}_2\text{Cl}_2$ , and the resulting solution was cooled to  $-78$  C. Triphosgene (55.0 mg, 0.185 mmol, 1.5 equiv) was added as a solid. The cooling bath was removed to allow the reaction to warm to ambient temperature, and the reaction was stirred for 36 hours. MeOH (0.2 mL) and small piece

of ice was added to quench the reaction. The reaction was filtered through a pad of Celite to remove the small amount of water, and concentrated. The product was purified by flash column chromatography to yield **S13** in 81% yield (44.0 mg).  $^1\text{H NMR}$  (600 MHz,  $\text{CDCl}_3$ )  $\delta$  6.14 (d,  $J = 9.8$  Hz, 1H), 5.51 (s, 1H), 5.35 (dd,  $J = 9.7, 5.4$  Hz, 1H), 5.30 (s, 1H), 5.15 (s, 1H), 4.48 (d,  $J = 10.4$  Hz, 1H), 3.90 (d,  $J = 10.2$  Hz, 1H), 2.83 (tq,  $J = 10.1, 6.6$  Hz, 1H), 2.44 (qd,  $J = 7.1, 2.1$  Hz, 1H), 2.36 (m, 1H), 1.94 (m, 1H), 1.89 (d,  $J = 1.4$  Hz, 3H), 1.78 – 1.62 (m, 2H), 1.42 (m, 1H), 1.30 (d,  $J = 6.3$  Hz, 3H), 1.28 (s, 3H), 1.25 (d,  $J = 6.7$  Hz, 3H), 1.04 (d,  $J = 7.0$  Hz, 3H), 0.97 (t,  $J = 7.4$  Hz, 3H).  $^{13}\text{C NMR}$  (151 MHz,  $\text{CDCl}_3$ )  $\delta$  165.77, 152.69, 147.32, 138.33, 137.12, 131.03, 115.13, 88.38, 85.63, 82.78, 78.31, 74.93, 37.03, 33.63, 33.37, 28.15, 27.97, 22.89, 16.99, 15.65, 12.63, 11.75, 10.03. **ESIHR** ( $\text{M}+\text{Na}$ ) calc'd 437.2170, found 437.2167.

### C. C-H azidation of complex molecules

#### General procedures for the azidation reactions

**Catalyst preparation:** A 0.02 M solution of the catalyst was prepared according to the following procedure and used in all C-H azidation and trifluoromethyl azidation reactions: In an  $\text{N}_2$ -filled glovebox, to a dry 4 ml vial containing a magnetic stirbar,  $\text{Fe}(\text{OAc})_2$  (10.4 mg, 0.06 mmol, 1 equiv) and **L1** (19.9 mg, 0.066 mmol, 1.1 equiv) were added 3.0 mL of  $\text{CH}_3\text{CN}$  or EtOAc. The reaction mixture was stirred for 16 hours at room temperature, during which time the color of the solution changed from colorless to blue.

#### General procedure (A) for the iron-catalyzed azidation of C-H bonds.

In an  $\text{N}_2$  filled glovebox, to a 4 ml vial containing the substrate (0.10 mmol), hypervalent iodine reagent **1** (2.0 – 3.0 equiv, 0.20 – 0.30 mmol) and a magnetic stir bar was added a 0.02 M

solution of (**L1**)Fe(OAc)<sub>2</sub> (0.5 ml, 0.1 equiv). The vial was sealed with a cap containing a PTFE septum and then kept at 23 or 50 °C for 48 h while monitoring by thin layer chromatography or GC for consumption of the starting material. The crude reaction mixture was then treated with 1 ml of EtOAc and filtered through a 30 x 6 mm plug of basic alumina (in a 9 mm pipette) into a 20 ml vial. The basic alumina was washed with 3 x 3.0 mL of EtOAc. The solvent was evaporated from the combined resulting solution, and the product was purified by flash column chromatography on silica gel. Ratios of products were determined by <sup>1</sup>H NMR analysis of crude reaction mixtures.

**General guidelines for identifying C-H azidation products:** During the azidation process a C-H bond was replaced with C-N<sub>3</sub> bond. We used DEPT135 and DEPT90 NMR experiments in combination with <sup>13</sup>C NMR to identify whether the C-H bond azidation occurred at primary, secondary or tertiary C-H bonds. The specific C-H bond that underwent azidation was identified by the change of the splitting pattern of the nearby hydrogens, or the appropriate 2D NMR correlations. The structures of nine compounds were determined unambiguously by X-ray diffraction of single crystals. For the products of azidation at secondary benzylic C-H bonds, the chemical shift of the tertiary C-H hydrogen (ArCH(R)N<sub>3</sub>) was diagnostic of a benzylic azide (4.5-4.8 ppm). The presence of the azide functionality was further confirmed by IR spectroscopy and high-resolution mass spectroscopy.

**Experimental procedures and NMR data for compounds 2a', 2h and 2i were previously reported by our research group.**<sup>9</sup> The structure of **2a'** was originally assigned as the product from mono-azidation of a secondary benzylic C-H bond. We have now shown that the ratio of this product (**2a'**) and a second azidation product arising from azidation of the tertiary C-H bond (**2a**) depends on conversion and that the product from azidation at the secondary benzylic position also contains one azide at the tertiary benzylic position. This product (**2a'**) forms from azidation of the initial product (**2a**). Structural assignment of all azides **2a** and **2a'** with corresponding <sup>1</sup>H NMR, <sup>13</sup>C NMR, HRMS and IR data are provided below.

**Azidation of estrone TBS ether:** Azide **2a** and **2a'** was prepared from estrone 3-TBS ether according to the general procedure (A) on a 0.1 mmol scale. EtOAc was used as the solvent, and

the reaction was run at 25 °C. The crude azide was purified by flash column chromatography (benzene) to give 2 fractions. Each fraction was further purified by flash column chromatography (hexanes:CH<sub>2</sub>Cl<sub>2</sub> 50:50) to give 3 azidation products.

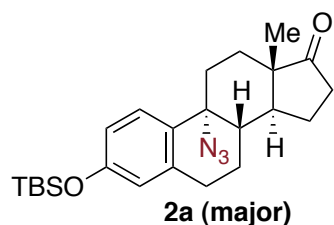

The major diastereomer of **2a** was obtained in 28% yield (11.9 mg). <sup>1</sup>H NMR (600 MHz, CDCl<sub>3</sub>) δ 7.28 (d, *J* = 8.6 Hz, 1H), 6.70 (dd, *J* = 8.5, 2.7 Hz, 1H), 6.65 (d, *J* = 2.5 Hz, 1H), 2.96 – 2.79 (m, 2H), 2.61 (dt, *J* = 11.9, 2.3 Hz, 1H), 2.53 – 2.44 (m, 1H), 2.16 (dt, *J* = 19.2, 9.0 Hz, 1H), 2.05 – 1.93 (m, 2H), 1.89 (td, *J* = 11.4, 11.0, 3.1 Hz, 1H), 1.85 – 1.69 (m, 5H), 1.62 – 1.53 (m, 1H), 0.98 (s, 9H), 0.90 (s, 3H), 0.20 (s, 6H); <sup>13</sup>C NMR (126 MHz, CDCl<sub>3</sub>) δ 220.07, 155.60, 138.25, 129.59, 126.25, 120.96, 117.65, 65.84, 47.69, 43.66, 41.16, 35.93, 29.77, 29.04, 28.02, 25.79, 21.43, 20.76, 18.31, 13.42, -4.22; **ESIHR** Calc'd (M-N<sub>2</sub>+H) 398.2510, found 398.2514; **FT-IR** 2932, 2885, 2858, 2095 (N<sub>3</sub>), 1742.

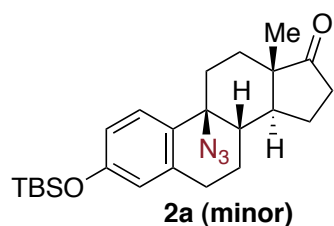

The minor diastereomer of **2a** was obtained in 14% yield (5.8 mg). <sup>1</sup>H NMR (600 MHz, CDCl<sub>3</sub>) δ 7.30 (d, *J* = 8.6 Hz, 1H), 6.71 (dd, *J* = 8.6, 2.7 Hz, 1H), 6.64 (d, *J* = 2.6 Hz, 1H), 2.75 (dd, *J* = 10.9, 4.6 Hz, 2H), 2.68 (dt, *J* = 14.4, 3.4 Hz, 1H), 2.46 (dd, *J* = 19.4, 8.7 Hz, 1H), 2.31 – 2.21 (m, 1H), 2.12 – 1.87 (m, 4H), 1.82 – 1.73 (m, 1H), 1.71 – 1.63 (m, 2H), 1.61 – 1.53 (m, 1H), 1.14 (td, *J* = 13.9, 3.6 Hz, 1H), 1.01 (s, 3H), 0.98 (s, 9H), 0.20 (s, 6H); <sup>13</sup>C NMR (151 MHz, CDCl<sub>3</sub>) δ 219.18, 155.55, 138.72, 127.29, 125.51, 121.11, 118.29, 66.49, 47.59, 43.27, 39.76, 35.81, 30.80, 28.53, 25.79, 25.18, 21.97, 19.82, 18.29, 13.60, -4.18, -4.20; **ESIHR** Calc'd (M-N<sub>2</sub>+H) 398.2510, found 398.2521; **FT-IR** 2931, 2858, 2091 (N<sub>3</sub>), 1742.

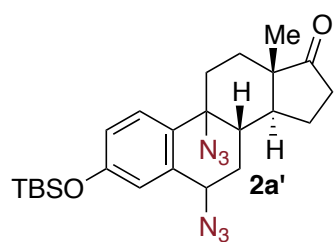

Bis-azidation product **2a'** was obtained in 24% yield (11.2 mg). <sup>1</sup>H NMR (600 MHz, CDCl<sub>3</sub>) δ 7.35 (d, *J* = 8.6 Hz, 1H), 6.89 (dd, *J* = 8.6, 2.6 Hz, 1H), 6.81 (d, *J* = 2.6 Hz, 1H), 4.65 (dd, *J* = 4.6, 1.9 Hz, 1H), 2.65 – 2.57 (m, 1H), 2.51 (dd, *J* = 19.2, 8.8 Hz, 1H), 2.28 – 2.10 (m, 3H), 2.08 – 1.99 (m, 1H), 1.99 – 1.92 (m, 1H), 1.84 (tq, *J* = 11.1, 3.9 Hz, 3H), 1.73 (td, *J* = 13.6, 3.8 Hz, 1H), 1.63 (tt, *J* = 12.2, 8.9 Hz, 1H), 0.99 (s, 9H), 0.94 (s, 3H), 0.23 (s, 3H), 0.23 (s, 3H); <sup>13</sup>C NMR (126 MHz, CDCl<sub>3</sub>) δ 219.49, 156.10, 134.42,

129.68, 126.58, 121.92, 120.83, 65.43, 59.08, 47.78, 42.91, 36.48, 35.82, 29.07, 27.94, 27.50, 25.76, 21.23, 18.33, 13.45, -4.18, -4.26; **ESIHR** Calc'd (M-N<sub>2</sub>+H) 439.2524, found 439.2533; **FT-IR** 2932, 2859, 2096 (N<sub>3</sub>), 1742.

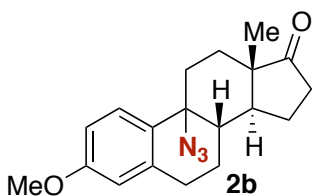

**Azidation of estrone methyl ether:** Azide **2b** was prepared from estrone 3-methyl ether according to the general procedure (A) on a 0.1 mmol scale. EtOAc was used as the solvent, and the reaction was run at 25 °C. The crude azide was purified by flash column chromatography (Hexane:EtOAc, 95:5) to give a 2:1 diastereomeric mixture of **2b** as a white solid in 43% overall yield (14.1 mg). The <sup>1</sup>H and <sup>13</sup>C NMR spectral data match those of the reported molecule.<sup>10</sup>

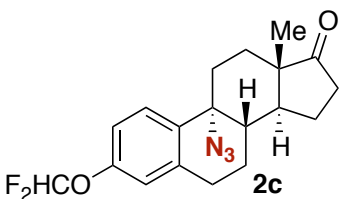

**Azidation of estrone difluoromethyl ether:** Azide **2c** was prepared from estrone 3-difluoromethyl ether<sup>11</sup> according to the general procedure (A) on a 0.1 mmol scale. EtOAc was used as the solvent, and the reaction was run at 25 °C. The crude azide was purified by flash column chromatography (Hexane:EtOAc, 95:5) to give **2c** as a colorless oil in 50% yield (18.3 mg). <sup>1</sup>H NMR (600 MHz, CDCl<sub>3</sub>) δ 7.42 (d, *J* = 8.7 Hz, 1H), 6.99 (dd, *J* = 8.6, 2.7 Hz, 1H), 6.95 (d, *J* = 2.6 Hz, 1H), 6.52 (t, *J* = 73.8 Hz, 1H), 3.03 – 2.86 (m, 2H), 2.65 – 2.57 (m, 1H), 2.50 (ddd, *J* = 19.1, 8.8, 1.0 Hz, 1H), 2.17 (dt, *J* = 19.2, 8.9 Hz, 1H), 2.07 – 1.95 (m, 2H), 1.89 (td, *J* = 10.9, 10.1, 2.7 Hz, 1H, H-8β) 1.86 – 1.70 (m, 5H), 1.65 – 1.52 (m, 1H), 0.90 (s, 3H); <sup>13</sup>C NMR (126 MHz, CDCl<sub>3</sub>) δ 219.72, 150.98, 139.07, 133.80, 126.61, 120.48, 116.86, 115.87 (t, *J* = 259.9 Hz), 65.26, 47.59, 43.59, 40.84, 35.87, 29.54, 29.00, 27.93, 21.39, 20.44, 13.36. **ESIHR** Calc'd (M-N<sub>2</sub>+H) 334.1613, found 334.1614; **FT-IR** 2096 (N<sub>3</sub>), 1739. The configuration at C9 was determined by the <sup>3</sup>*J*<sub>H-H</sub> coupling constant of H-8β. The td splitting pattern that was observed for this C8-H was consistent with the previously reported spectra of 3-methoxyestrone<sup>10</sup> and 3-acetoxyestrone<sup>12</sup> bearing a C9 azido group in the a configuration.

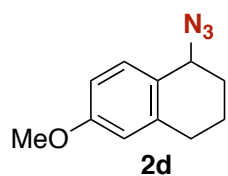

**Azidation 6-methoxy-1,2,3,4-tetrahydronaphthalene:** Azide **2d** was prepared from 6-methoxy-1,2,3,4-tetrahydronaphthalene according to the general procedure (A) on a 0.1 mmol scale. EtOAc was used as the solvent, and the reaction was run at 25 °C. The crude azide was purified by flash

column chromatography (Hexane:EtOAc 99:1) to give **2d** as a colorless oil in 53% yield (10.8 mg). The regioselectivity of the azidation was determined to be 9:1. The  $^1\text{H}$  and  $^{13}\text{C}$  NMR spectral data match those of the reported molecule.<sup>13</sup>

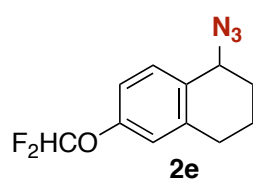

**Azidation of 6-(difluoromethoxy)-1,2,3,4-tetrahydronaphthalene:**

Azide **2e** was prepared from **S3** according to the general procedure (A) on a 0.1 mmol scale. EtOAc was used as the solvent, and the reaction was run at 25 °C. The crude azide was purified by flash column chromatography

(Hexane:EtOAc 99:1) to give **2e** as a colorless oil in 57% yield (13.6 mg). The regioselectivity was determined to be 2:1.  $^1\text{H}$  NMR (500 MHz,  $\text{CDCl}_3$ ) for the major diastereomer:  $\delta$  7.33 (d,  $J$  = 8.4 Hz, 1H), 7.01 (dd,  $J$  = 8.4, 2.6 Hz, 1H), 6.93 (d,  $J$  = 2.5 Hz, 1H), 6.53 (t,  $J$  = 73.9 Hz, 1H), 4.59 (t,  $J$  = 4.6 Hz, 1H,  $\text{CHN}_3$ ); for the minor diastereomer 7.16 (d,  $J$  = 8.4 Hz, 1H), 7.12 (d,  $J$  = 2.6 Hz, 1H), 7.04 (dd,  $J$  = 8.4, 2.7 Hz, 1H), 6.52 (t,  $J$  = 74.0 Hz, 1H), 4.56 (t,  $J$  = 5.1 Hz, 1H,  $\text{CHN}_3$ ); for the major + minor diastereomers  $\delta$  2.83 – 2.91 (m, 1H), 2.82 – 2.69 (m, 1H), 2.11 – 1.94 (m, 3H), 1.82 – 1.89 (m, 1H);  $^{13}\text{C}$  NMR (126 MHz,  $\text{CDCl}_3$ )  $\delta$  150.78, 139.49, 135.49, 134.53, 131.01, 130.79, 130.69, 119.86, 119.77, 117.31, 115.86 (t,  $J$  = 259.5 Hz), 59.17, 58.82, 29.00, 28.96, 28.80, 28.22, 19.14, 18.70; EIHR calc'd 239.0870, found 239.0871; FT-IR 2940, 2869, 2098 ( $\text{N}_3$ ).

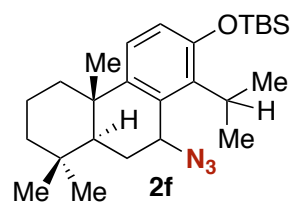

**Azidation of totarol TBS ether:** Azide **2f** was prepared from **S1** according to the general procedure (A) on a 0.1 mmol scale. EtOAc was used as the solvent, and the reaction was run at 25 °C. The crude

azide was purified by flash column chromatography (Hexane) to give a 1.4:1 diastereomeric mixture of **2f** as a white solid in 43% yield (19.1 mg). EIHR Calc'd 441.3175, found 441.3175; FT-IR 2957, 2929, 2859, 2097 ( $\text{N}_3$ ). At ambient temperature **2f** exists as a mixture of two rotomers caused by the large *i*-Pr and OTBS groups. TBS group was removed according to the following procedure for the characterization of this compound.

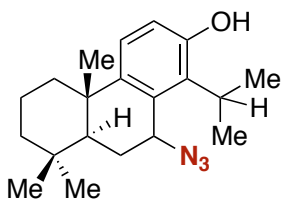

**TBS deprotection of azide **2f**:** To the solution of **2f** (12.0 mg, 0.0272 mmol, 1 equiv) in THF (0.5 mL) was added 1 M solution of TBAF in THF (40.7 mL, 0.0407 mmol, 1.5 equiv). The reaction mixture was stirred at ambient temperature for 2 hours and then diluted with Et<sub>2</sub>O (30 mL) and washed with H<sub>2</sub>O (10 mL). The ether layer was dried over

MgSO<sub>4</sub>, filtered, and concentrated. The crude azide was purified by flash column chromatography (hexanes:EtOAc 95:5) to give azidototarol **S14** in 88% yield (7.8 mg). **<sup>1</sup>H NMR** (500 MHz, CDCl<sub>3</sub>)  $\delta$  for the major diastereomer: 7.07 (d,  $J = 8.7$  Hz, 1H), 6.67 (d,  $J = 8.6$  Hz, 1H), 4.75 (dd,  $J = 4.5, 2.0$  Hz, 1H, CHN<sub>3</sub>), 4.60 (s, 1H), 3.37 (m, 1H), 2.19 (dt,  $J = 14.3, 1.9$  Hz, 1H), 1.47 (d,  $J = 7.0$  Hz, 3H), 1.39 (d,  $J = 7.1$  Hz, 3H), 1.16 (s, 3H), 1.05 (s, 3H), 0.94 (s, 3H); for the minor diastereomer: 7.03 (d,  $J = 8.6$  Hz, 1H), 6.64 (d,  $J = 8.6$  Hz, 1H), 4.66 (t,  $J = 9.0$  Hz, 1H, CHN<sub>3</sub>), 4.60 (s, 1H), 3.37 (m, 1H), 2.46 (ddd,  $J = 13.6, 9.1, 2.5$  Hz, 1H), 1.49 (d,  $J = 7.0$  Hz, 3H), 1.35 (d,  $J = 7.1$  Hz, 3H), 1.30 (s, 3H), 0.98 (s, 3H), 0.97 (s, 3H); for the major + minor diastereomers: 2.29 – 2.22 (m, 1H), 2.04 – 1.92 (m, 1H), 1.84 – 1.44 (m, 3H), 1.43 – 1.17 (m, 3H); **<sup>13</sup>C NMR** (126 MHz, CDCl<sub>3</sub>)  $\delta$  for the major diastereomer: 152.71, 143.56, 132.82, 129.64, 123.88, 117.78, 59.36, 45.29, 41.33, 39.11, 38.49, 33.29, 33.15, 28.25, 26.87, 24.92, 21.69, 20.94, 20.55, 19.34; for the minor diastereomer: 152.95, 145.37, 133.22, 130.98, 123.06, 117.10, 58.37, 48.64, 41.49, 39.95, 37.82, 33.37, 32.99, 29.21, 27.19, 24.83, 21.51, 20.89, 20.47, 19.53; **ESIHR** (M-H) calc'd 326.2238, found 326.2234; **FT-IR** 3409, 2925, 2867, 2097 (N<sub>3</sub>).

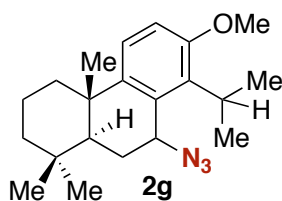

**Azidation of totarol methyl ether:** Azide **2g** was prepared from **S2** according to the general procedure (A) on a 0.1 mmol scale. EtOAc was used as the solvent, and the reaction was run at 25 °C. The crude azide was purified by flash column chromatography (Hexane:EtOAc 98:2) to

give a 1.5:1 diastereomeric mixture of **2g** as a white solid in 50% yield (17.0 mg). **<sup>1</sup>H NMR** (400 MHz, CDCl<sub>3</sub>) for the major diastereomer:  $\delta$  7.16 (d,  $J = 8.8$  Hz, 1H), 6.86 (d,  $J = 8.9$  Hz, 1H), 4.74 (dd,  $J = 4.4, 2.1$  Hz, 1H, CHN<sub>3</sub>), 3.80 (s, 3H), 3.39 – 3.24 (m, 1H), 2.17 (dt,  $J = 14.3, 1.9$  Hz, 1H), 1.40 (d,  $J = 6.9$  Hz, 3H), 1.32 (d,  $J = 7.0$  Hz, 3H), 1.15 (s, 3H), 1.03 (s, 3H), 0.93 (s, 3H); for the minor diastereomer:  $\delta$  7.12 (d,  $J = 8.8$  Hz, 1H), 6.83 (d,  $J = 8.8$  Hz, 1H), 4.66 (t,  $J = 9.0$  Hz, 1H, CHN<sub>3</sub>), 3.80 (s, 3H), 3.32 (m, 1H), 2.44 (ddd,  $J = 13.6, 9.1, 2.6$  Hz, 1H), 1.42 (d,  $J = 7.0$  Hz, 3H), 1.30 (s, 3H), 1.28 (d,  $J = 7.1$  Hz, 3H), 0.97 (s, 3H), 0.95 (s, 3H); for the major+minor



*diastereomers*:  $\delta$  2.27 (dd,  $J = 10.1, 6.3$  Hz, 1H), 2.05 – 1.90 (m, 1H), 1.75 (tt,  $J = 13.6, 3.5$  Hz, 1H), 1.69 – 1.45 (m, 4H), 1.27 – 1.17 (m, 1H);  $^{13}\text{C}$  NMR (126 MHz,  $\text{CDCl}_3$ ) *for the major diastereomer*:  $\delta$  156.99, 143.14, 135.22, 129.29, 123.68, 112.76, 58.45, 55.21, 45.30, 41.35, 39.17, 38.46, 33.30, 33.16, 28.68, 26.96, 25.03, 21.71, 21.53, 20.60, 19.56; *for the minor diastereomer*:  $\delta$  157.23, 144.96, 135.69, 130.60, 122.80, 112.11, 59.32, 55.21, 48.63, 41.35, 40.00, 37.77, 33.38, 32.99, 29.65, 27.31, 24.85, 21.53, 21.04, 20.66, 19.36; **EIHR** Calc'd 341.2467, found ; **FT-IR** 2930, 2867, 2096 ( $\text{N}_3$ ).

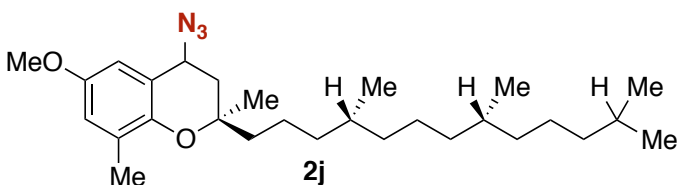

#### **Azidation of tocopherol methyl ether:**

Azide **2j** was prepared from **S4** according to the general procedure (A) on a 0.1 mmol scale. EtOAc was used as the solvent, and the reaction was run at 25 °C. The crude azide was purified by flash column chromatography (Hexane: $\text{CH}_2\text{Cl}_2$  80:20) to give a 1:1 diastereomeric mixture of **2j** as a colorless oil in 25% yield (11.6 mg).  $^1\text{H}$  NMR (600 MHz,  $\text{CDCl}_3$ ) *for a 1:1 mixture of diastereomers*:  $\delta$  6.93 – 6.72 (m, 2H), 4.64 (m, 1H,  $\text{CHN}_3$ ), 3.88 (s, 3H), 2.27 (s,  $J = 3.3$  Hz, 3H), 2.08 (m, 1H), 1.81 – 1.75 (m, 1H), 1.73 – 1.57 (m, 3H), 1.57 – 1.43 (m, 3H), 1.50 (s, 3H), 1.43 – 1.30 (m, 6H), 1.36 (s, 3H), 1.30 – 1.11 (m, 6H), 1.04 – 0.91 (m, 12H);  $^{13}\text{C}$  NMR (151 MHz,  $\text{CDCl}_3$ ) *for a 1:1 mixture of diastereomers*:  $\delta$  152.58 (2 overlapping resonances), 145.73, 145.65, 128.06, 128.02, 119.21, 119.03, 117.69, 117.59, 109.20, 108.91, 76.24, 76.21, 55.72, 55.69, 54.85, 54.60, 41.70, 39.38 (2 overlapping resonances), 38.54, 37.47, 37.44, 37.40, 37.39, 37.37, 37.34, 37.31, 37.29, 37.11, 32.84, 32.82, 32.69, 32.66, 28.01 (3 overlapping resonances), 25.50, 24.84 (2 overlapping resonances), 24.48, 24.46, 23.37, 22.76 (2 overlapping resonances), 22.67 (2 overlapping resonances), 21.09, 20.90, 19.78, 19.77, 19.70, 19.64, 16.37, 16.36; **EIHR** calc'd 457.3668, found 457.3672; **FT-IR** 2951, 2925, 2867, 2095 ( $\text{N}_3$ ).

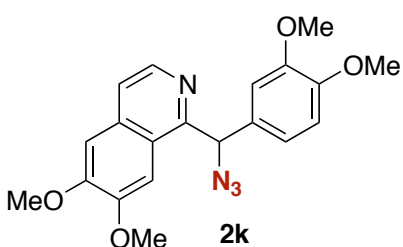

**Azidation of pyridine derivative:** Azide **2k** was prepared from papaverine according to the general procedure (A) on a 0.1 mmol scale. MeCN was used as the solvent, and the reaction was run at 25 °C. The crude azide was purified by flash column chromatography (Hexane:EtOAc 60:40) to give

**2k** as a colorless oil in 45% yield (17.0 mg). The  $^1\text{H}$  and  $^{13}\text{C}$  NMR spectral data match those of the reported molecule.<sup>12</sup>

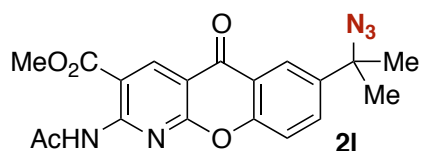

**Azidation of 2-amidopyridine derivative:** Azide **2l** was prepared from **S6** according to the general procedure (A) on a 0.1 mmol scale. MeCN was used as the solvent, and the reaction was run at 50 °C. The crude azide was purified by flash column chromatography (Hexane:EtOAc 70:30) to give **2l** as a colorless oil in 62% yield (24.4 mg).  $^1\text{H}$  NMR (600 MHz,  $\text{CDCl}_3$ )  $\delta$  11.30 (s, 1H), 9.31 (s, 1H), 8.31 (d,  $J = 1.4$  Hz, 1H), 7.91 (dd,  $J = 8.8, 1.5$  Hz, 1H), 7.62 (d,  $J = 8.8$  Hz, 1H), 4.02 (s, 3H), 2.56 (s, 3H), 1.72 (s, 6H);  $^{13}\text{C}$  NMR (151 MHz,  $\text{CDCl}_3$ )  $\delta$  176.09, 169.87, 166.37, 161.69, 155.24, 154.72, 142.85, 142.47, 133.33, 123.09, 121.42, 119.13, 111.14, 108.74, 63.40, 53.23, 28.51, 26.67. **ESIHR** (M+Na) calc'd 418.1122, found 418.1129; **FT-IR** 3237, 2955, 2107 ( $\text{N}_3$ ), 1687, 1665, 1601.

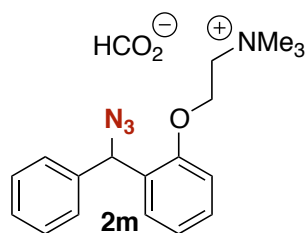

**Azidation of tetraalkyl ammonium salt S7:** Azide **2m** was prepared from **S7** according to the general procedure (A) on a 0.1 mmol scale. MeCN was used as the solvent, and the reaction was run at 50 °C. The crude azide was first purified by UHPLC-MS (C-18 column, 30% MeCN in water to 95% MeCN in water with 0.1% formic acid). This UHPLC-MS purified material was contaminated with 2-iodobenzoic acid, which was removed by further purification by flash column chromatography ( $\text{CH}_2\text{Cl}_2$ :MeOH:H<sub>2</sub>O:HCO<sub>2</sub>H 90:10:0.6:0.6 then 70:30:5:5) to give **2m** as the formate salt in 27% yield (9.6 mg).  $^1\text{H}$  NMR (600 MHz,  $\text{CD}_3\text{CN}$ )  $\delta$  8.40 (s, 1H), 7.48 – 7.26 (m, 7H), 7.14 – 6.97 (m, 2H), 6.18 (s, 1H), 4.37 (s, 2H), 3.63 (s, 2H), 3.04 (s, 9H);  $^{13}\text{C}$  NMR (226 MHz,  $\text{CD}_3\text{CN}$ )  $\delta$  166.98, 155.61, 140.24, 130.62, 129.67, 129.42, 129.06, 128.57, 128.35, 122.76, 113.13, 66.35, 63.25, 63.07, 54.75; **ESIHR** (M) calc'd 311.1866, found 311.1864; **FT-IR** 2917, 2098 ( $\text{N}_3$ ), 1619, 1598.

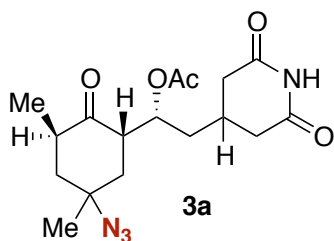

**Azidation of cycloheximide acetate:** Azide **3a** was prepared from cycloheximide acetate<sup>14</sup> according to the general procedure (A) on a 0.1 mmol scale. EtOAc was used as the solvent, and the reaction was run at 50 °C. The crude azide was purified by flash column

chromatography (Hexane:EtOAc 60:40) to give **3a** as a colorless oil in 40% yield (14.5 mg).  $^1\text{H NMR}$  (400 MHz,  $\text{CDCl}_3$ )  $\delta$  8.13 (s, 1H), 5.39 (td,  $J = 8.1, 3.6$  Hz, 1H), 2.95 (ddd,  $J = 17.3, 4.3, 1.8$  Hz, 1H), 2.87 (ddd,  $J = 13.1, 7.7, 5.7$  Hz, 1H), 2.77 (dt,  $J = 12.7, 6.2$  Hz, 1H), 2.66 (ddd,  $J = 16.9, 4.2, 1.7$  Hz, 1H), 2.36 (ddd,  $J = 36.3, 17.1, 10.6$  Hz, 2H), 2.24 – 2.13 (m, 1H), 2.13 – 2.02 (m, 1H), 2.10 (s, 3H), 1.75 – 1.48 (m, 5H), 1.46 (s, 3H), 1.03 (d,  $J = 6.5$  Hz, 3H).  $^{13}\text{C NMR}$  (101 MHz,  $\text{CDCl}_3$ )  $\delta$  210.45, 171.86, 171.74, 170.64, 68.69, 60.73, 49.08, 46.24, 40.98, 40.13, 38.89, 38.42, 37.08, 27.38, 25.86, 21.09, 13.71. **ESIHR** ( $\text{M}+\text{Na}$ ) calc'd 387.1639, found 387.1643; **FT-IR** 3462, 2102 ( $\text{N}_3$ ), 1736.

*Structural assignment for the azide 3a.*

To assign the structure of the C-H azidation product of the cycloheximide acetate we first identified  $^1\text{H}$  resonances corresponding to the two methyl groups. These resonances were 1.46 (s, 3H) and 1.03 (d,  $J = 6.5$  Hz, 3H). One these methyl groups is a singlet, indicating that the C-H bond  $\alpha$  to this methyl group underwent C-H azidation. We then used HMBC correlations to identify which of the two C-H bonds  $\alpha$  to the two methyl groups in the starting material (cycloheximide acetate) underwent C-H azidation. These key HMBC correlations are shown in Figure S1.

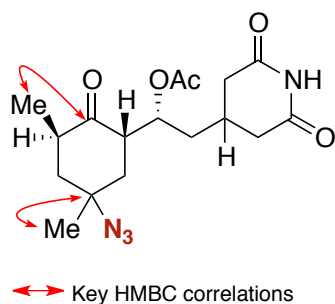

**Figure S1** Key HMBC correlations of **3a**.

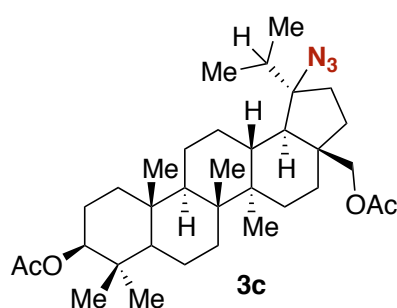

**Azidation of betulin diacetate:** Azide **3b** was prepared from **S8** according to the general procedure (A) on a 0.1 mmol scale. EtOAc was used as the solvent, and the reaction was run at 50 °C. The crude azide was purified by flash column chromatography (Hexane: $\text{CH}_2\text{Cl}_2$  70:30) to give **3b** as a colorless oil in 48% yield (17.7 mg).  $^1\text{H NMR}$  (900 MHz,  $\text{CDCl}_3$ )  $\delta$  4.48 (dd,  $J = 11.7, 4.6$  Hz, 1H), 4.14 (d,  $J = 11.3$  Hz, 1H), 4.01 (d,  $J = 11.3$  Hz, 1H), 2.15 (h,  $J = 6.8$  Hz, 1H), 2.06 (s, 3H), 2.04 (s, 3H), 1.92 (ddt,  $J = 15.4, 12.5, 5.8$  Hz, 2H), 1.82 (d,

$J = 13.2$  Hz, 1H), 1.75 (dd,  $J = 12.8, 7.5$  Hz, 1H), 1.71 – 1.57 (m, 6H), 1.51 (tt,  $J = 9.0, 4.8$  Hz, 2H), 1.45 – 1.23 (m, 8H), 1.20 (td,  $J = 12.8, 12.3, 8.6$  Hz, 1H), 1.03 (s, 3H), 1.02 (s, 3H), 0.96 (s, 3H), 0.95 (s, 3H), 0.88 (m, 1H), 0.86 (s, 3H), 0.84 (s, 3H), 0.84 (m, 3H), 0.81 (m, 2H);  $^{13}\text{C}$  NMR (226 MHz,  $\text{CDCl}_3$ )  $\delta$  171.30, 170.96, 80.79, 77.94, 62.41, 58.05, 55.26, 50.04, 45.73, 44.03, 41.10, 38.28, 37.77, 36.99, 35.07, 34.82, 34.00, 33.51, 31.58, 30.90, 27.90, 26.92, 25.12, 23.64, 21.31, 20.99, 20.71, 19.66, 19.31, 18.16, 16.45, 16.06, 16.03, 15.16. **ESIHR** (M-N<sub>2</sub>+H) calc'd 542.4204, found 542.4195; **FT-IR** 2945, 2874, 2091 (N<sub>3</sub>).

*Structural assignment for the azide 3b.*

$^1\text{H}$ - $^1\text{H}$  COSY correlations (Figure S2) indicated that the protons on two CH<sub>3</sub> groups (C29 and C30) couple with C20-H, and this spin system does not couple with the rest of protons indicating that the C19 is a quaternary center. Based on these data, we deduced that the C19 carbon is connected to the N<sub>3</sub> group. This assignment was further confirmed by  $^1\text{H}$ - $^{13}\text{C}$  HMBC correlations shown in Figure S2.

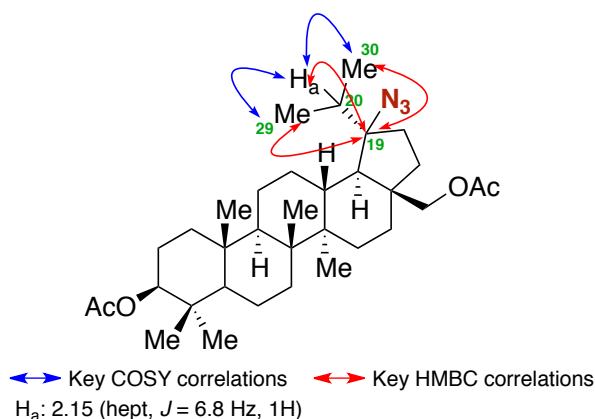

**Figure S2** Key  $^1\text{H}$ - $^1\text{H}$  COSY and  $^1\text{H}$ - $^{13}\text{C}$  HMBC correlations and coupling constants of **3b**.

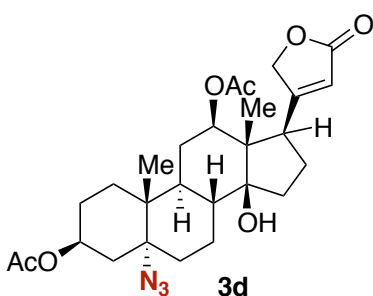

**Azidation of digoxigenin diacetate:** Azide **3d** was prepared from **10b** according to the general procedure (A) on a 0.1 mmol scale. EtOAc was used as the solvent, and the reaction was run at 50 °C. The crude azide was purified by flash column chromatography ( $\text{CH}_2\text{Cl}_2$ :EtOAc 90:10) to give **3d** as a white solid in 68% yield (35.0 mg).  $^1\text{H}$  NMR (600 MHz,  $\text{CDCl}_3$ )  $\delta$

5.83 (q,  $J = 1.6$  Hz, 1H), 5.03 (tt,  $J = 11.0, 5.4$  Hz, 1H), 4.88 (dd,  $J = 18.1, 1.8$  Hz, 1H), 4.76 (dd,  $J = 17.9, 1.8$  Hz, 1H), 4.59 (dd,  $J = 11.9, 4.2$  Hz, 1H), 2.87 (dd,  $J = 9.4, 6.2$  Hz, 1H), 2.22 – 2.10 (m, 1H), 2.06 (s, 3H), 2.01 (s, 3H), 2.05 – 1.97 (m, 1H), 1.97 – 1.86 (m, 4H), 1.85 – 1.77 (m, 2H)

1.75 – 1.57 (m, 6H) 1.57 – 1.30 (m, 4H), 1.21 (q,  $J = 12.1$  Hz, 1H), 0.99 (s, 3H), 0.87 (s, 3H).  $^{13}\text{C}$  NMR (226 MHz,  $\text{CDCl}_3$ )  $\delta$  174.26, 173.25, 170.60, 170.37, 118.02, 85.54, 77.36, 73.28, 69.45, 68.78, 53.91, 45.83, 40.26, 38.31, 37.96, 35.67, 33.09, 30.52, 29.88, 27.11, 26.45, 26.30, 21.78, 21.28, 21.20, 15.36, 10.33; **ESIHR** (M+H) calc'd 516. 2704, found 516.2720; **FT-IR** 3463, 2949, 2102 ( $\text{N}_3$ ), 1736.

*Structural assignment for the azide 3d.*

As shown in Figure S3, the A/B ring system of digoxigenin diacetate (**S8**) (starting material for this azidation reaction) has a *cis*-decalin conformation. In this case C3-OAc occupies the axial position and C3-H occupies the equatorial position. The  $^3J_{\text{H-H}}$  coupling constants involving C3-H at 5.01 ppm are smaller than those from a  $^3J_{\text{Hax-Hax}}$  value. Thus, the observed coupling is due to  $^3J_{\text{Heq-Heq}}$  and  $^3J_{\text{Heq-Hax}}$  couplings. Because the two  $^3J_{\text{H-H}}$  values are small and close in value to each other, the C3-H resonance in **S8** is a broad singlet. In azide **3d**, C3-H (labeled as  $\text{H}_a$  in Figure S3) resonates with a tt splitting pattern with coupling constants of 11.0 Hz and 5.4 Hz. The 11.0 Hz coupling constant corresponds to a  $^3J_{\text{Hax-Hax}}$  coupling. This coupling indicates that  $\text{H}_a$  occupies an axial position and the A/B ring fusion has changed from a *cis*-decalin structure to a *trans*-decalin structure. COSY and HMBC correlations shown in Figure S3 were used to identify the position of the azido group.

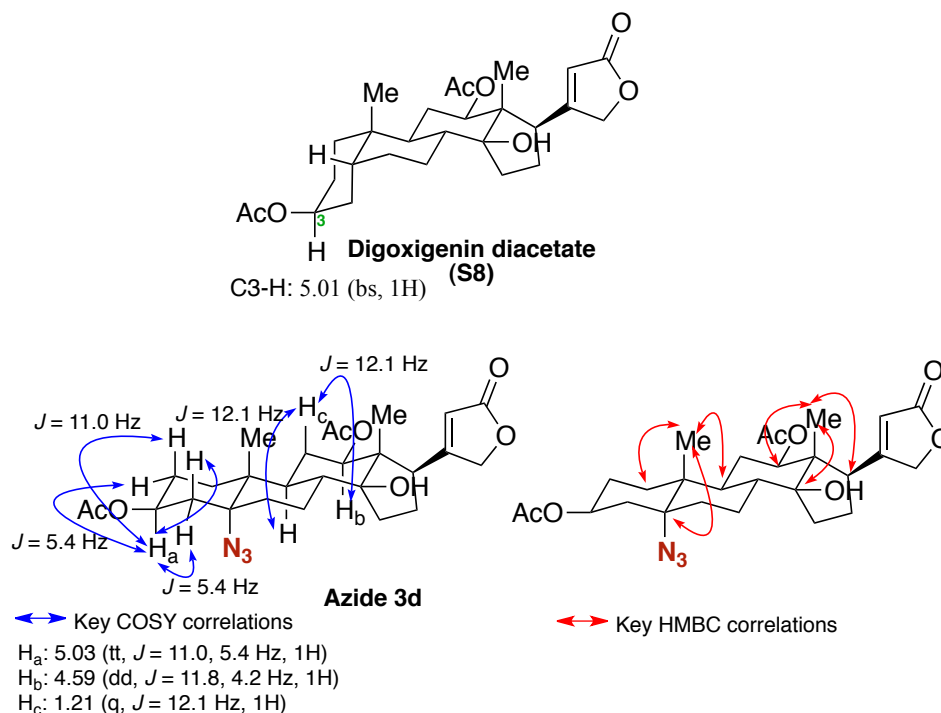

**Figure S3** Key  $^1\text{H}$ - $^1\text{H}$  COSY and HMBC correlations and coupling constants of azide **3d**.

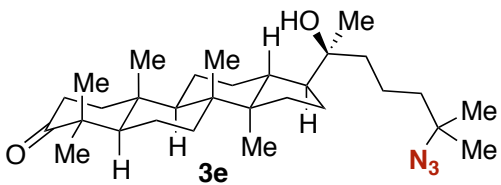

**Azidation of dihydrodipterocarpol:** Azide **3e** was prepared from 24,25-dihydrodipterocarpol<sup>15</sup> according to the general procedure (A) on a 0.1 mmol scale. MeCN was used as the solvent, and the reaction was

run at 50 °C. The crude azide was purified by flash column chromatography (Hexane:EtOAc 90:10) to give **3e** as a colorless oil in 63% yield (29.6 mg). <sup>1</sup>H NMR (600 MHz, CDCl<sub>3</sub>) δ 2.50 (ddd, *J* = 15.6, 9.6, 7.6 Hz, 1H), 2.42 (ddd, *J* = 15.6, 7.7, 4.4 Hz, 1H), 1.92 (ddd, *J* = 12.6, 7.7, 4.5 Hz, 1H), 1.86 – 1.78 (m, 1H), 1.78 – 1.69 (m, 2H), 1.69 – 1.29 (m, 20H), 1.27 (s, 6H), 1.16 (m, 1H) 1.15 (s, 3H), 1.08 (s, 3H), 1.03 (s, 3H), 1.00 (s, 3H), 0.94 (s, 3H), 0.89 (s, 3H); <sup>13</sup>C NMR (151 MHz, CDCl<sub>3</sub>) δ 218.16, 75.41, 61.85, 55.51, 50.43, 50.14, 50.07, 47.57, 42.60, 42.23, 40.82, 40.44, 40.04, 36.99, 34.69, 34.26, 31.33, 27.65, 26.86, 26.30, 26.10, 25.74, 24.99, 22.18, 21.16, 19.80, 18.64, 16.52, 16.16, 15.34; **ESIHR** (M+Na) calc'd 508.3873, found 508.3866; **FT-IR** 2952, 2869, 2097 (N<sub>3</sub>), 1704.

*Structural assignment for the azide 3e.*

The structure was assigned based on the observation that all methyl groups resonated as singlets in the <sup>1</sup>H NMR spectrum.

**Azidation of artemisinic acid derivative S9** was conducted according to the general procedure (A) on a 0.1 mmol scale. EtOAc was used as the solvent, and the reaction was run at 50 °C. The crude azide isomers were purified by flash column chromatography (Hexane:EtOAc 60:40) to give **3f-h** as white solids.

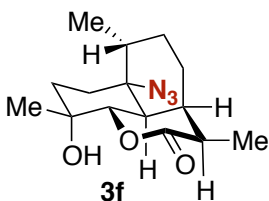

**3f** was obtained in 22% yield (6.5 mg). <sup>1</sup>H NMR (500 MHz, CDCl<sub>3</sub>) δ 4.29 (d, *J* = 11.6 Hz, 1H), 2.68 (p, *J* = 7.0 Hz, 1H), 2.42 (dd, *J* = 11.6, 3.8 Hz, 1H), 2.29 (m, 1H), 2.03 (td, *J* = 13.7, 4.4 Hz, 1H), 1.95 (m, 2H), 1.86 (m, 1H), 1.83 – 1.71 (m, 2H), 1.62 (m, 2H), 1.46 (m, 2H), 1.36 (s, 3H), 1.23 (d, *J* = 7.1 Hz, 3H), 0.89 (d, *J* = 6.5 Hz, 3H). <sup>13</sup>C NMR (151 MHz, CDCl<sub>3</sub>) δ 174.36, 80.55, 69.88, 66.37, 41.17, 40.14, 34.34, 32.93, 31.18, 30.00, 26.86, 26.69, 22.65, 15.10, 13.40; **FT-IR** 3442, 2927, 2095 (N<sub>3</sub>), 1727. Single crystals suitable for **X-ray** diffraction were obtained by slow vapor diffusion of octane into a solution of **3f** in a mixture of ether and octane.

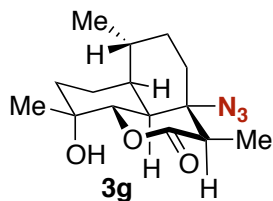

**3g** was obtained in 12% yield (3.5 mg).  $^1\text{H NMR}$  (600 MHz,  $\text{CDCl}_3$ )  $\delta$  4.19 (d,  $J = 11.7$  Hz, 1H), 2.75 (q,  $J = 7.1$  Hz, 1H), 2.32 (ddd,  $J = 11.8$ , 4.0, 1.9 Hz, 1H), 1.90 – 1.56 (m, 9H), 1.52 (td,  $J = 14.5$ , 4.3 Hz, 1H), 1.44 (td,  $J = 13.8$ , 3.9 Hz, 1H), 1.36 (s, 3H), 1.33 (d,  $J = 7.2$  Hz, 3H), 0.91 (d,  $J = 6.3$  Hz, 3H);  $^{13}\text{C NMR}$  (151 MHz,  $\text{CDCl}_3$ )  $\delta$  172.30, 80.88, 70.81, 64.81, 46.32, 40.87, 38.85, 32.89, 30.36, 27.44, 26.79, 26.33, 21.96, 19.77, 9.98; **FT-IR** 3505, 2924, 2853, 2101 ( $\text{N}_3$ ), 1731. Single crystals suitable for **X-ray** diffraction were obtained by slow vapor diffusion of octane into the solution of **3g** in a mixture of ether and octane.

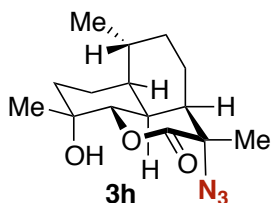

**3h** was obtained in 7% yield (2.1 mg).  $^1\text{H NMR}$  (500 MHz,  $\text{CDCl}_3$ )  $\delta$  4.34 (d,  $J = 12.0$  Hz, 1H), 2.70 (dt,  $J = 12.2$ , 4.1 Hz, 1H), 1.94 – 1.75 (m, 3H), 1.68 (m, 4H), 1.56 (m, 1H), 1.51 (s, 3H), 1.49 – 1.37 (m, 2H), 1.34 (s, 3H), 1.33 – 1.22 (m, 1H), 1.15 – 0.96 (m, 1H), 0.86 (d,  $J = 6.3$  Hz, 3H);  $^{13}\text{C NMR}$  (151 MHz,  $\text{CDCl}_3$ )  $\delta$  170.03, 82.06, 70.64, 65.62, 44.08, 42.87, 34.89, 32.82, 32.57, 27.16 (2 overlapping resonances), 23.15, 22.25, 19.96, 19.26; **FT-IR** 3435, 2937, 2109 ( $\text{N}_3$ ), 1722. Single crystals suitable for **X-Ray** analysis were obtained by slow vapor diffusion of octane into the solution of **3h** in a mixture of ether and octane.

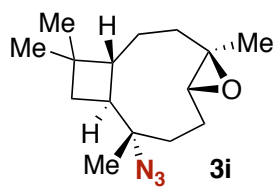

**Azidation of dihydrocaryophyllene oxide:** Azide **3i** was prepared from dihydrocaryophyllene oxide<sup>16</sup> according to the general procedure (A) on a 0.1 mmol scale. EtOAc was used as the solvent, and the reaction was run at 50 °C for 15 hours. The crude azide was purified by flash column chromatography (Hexane:EtOAc 95:5) to give **3i** as a colorless oil in 44% yield (11.6 mg).  $^1\text{H NMR}$  (600 MHz,  $\text{CDCl}_3$ )  $\delta$  2.75 (dd,  $J = 9.7$ , 5.7 Hz, 1H), 2.21 (m, 2H), 2.09 (dt,  $J = 13.0$ , 3.6 Hz, 1H), 2.05 (ddd,  $J = 14.2$ , 5.6, 2.9 Hz, 1H), 1.84 (td,  $J = 13.5$ , 5.4 Hz, 1H), 1.78 (dd,  $J = 11.7$ , 9.0 Hz, 1H), 1.74 – 1.59 (m, 3H), 1.50 (m, 1H), 1.43 (m, 1H), 1.31 (s, 3H), 1.30 (s, 3H), 0.98 (s, 3H), 0.96 (s, 3H), 0.93 (dd,  $J = 13.5$ , 4.0 Hz, 1H);  $^{13}\text{C NMR}$  (151 MHz,  $\text{CDCl}_3$ )  $\delta$  67.30, 60.47, 59.29, 50.57, 47.11, 40.10, 37.36, 36.36, 32.42, 30.23, 28.80, 24.78, 23.27, 17.48, 16.38; **ESIHR** ( $\text{M}-\text{N}_2+\text{H}$ ) calc'd 236.2009, found 236.2008; **FT-IR** 2932, 2857, 2089 ( $\text{N}_3$ ); Single crystals suitable for **X-Ray** analysis were obtained by slow evaporation of octane from a solution of **3i** in octane.

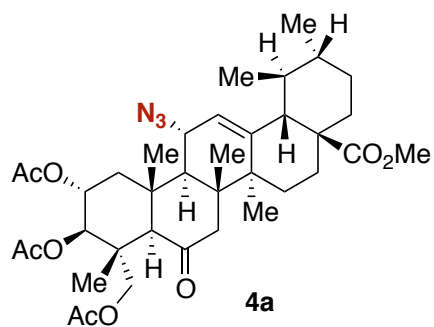

**Azidation of the madecassic acid derivative:** Azide **4a** was prepared from **S9** according to the general procedure (A) on a 0.1 mmol scale. EtOAc was used as the solvent, and the reaction was run at 50 °C for 15 hours. The crude azide was purified by flash column chromatography (Hexane:EtOAc 95:5) to give **4a** as a white solid in 42% yield (28.8 mg). A side product, diene **S15**, was obtained in

16% yield. (10.9 mg).  $^1\text{H NMR}$  (400 MHz,  $\text{CDCl}_3$ )  $\delta$  5.48 (d,  $J = 3.5$  Hz, 1H), 5.22 (td,  $J = 11.0$ , 4.7 Hz, 1H), 4.99 (d,  $J = 10.4$  Hz, 1H), 3.93 (d,  $J = 11.6$  Hz, 1H), 3.87 (dd,  $J = 9.3$ , 3.5 Hz, 1H), 3.82 (d,  $J = 11.6$  Hz, 1H), 3.63 (s, 3H), 2.74 (s, 1H), 2.59 (dd,  $J = 13.0$ , 4.7 Hz, 1H), 2.52 (d,  $J = 12.3$  Hz, 1H), 2.40 (d,  $J = 11.2$  Hz, 1H), 2.28 (d,  $J = 9.2$  Hz, 1H), 2.11 (s, 3H), 2.06 (s, 3H), 2.05 (s, 3H), 1.92 (d,  $J = 12.3$  Hz, 1H), 1.81 – 1.54 (m, 8H), 1.37 (s, 3H), 1.32 (s, 3H), 1.20 – 1.42 (m, 3H) 1.24 (s, 3H), 1.05 (d,  $J = 6.5$  Hz, 3H), 1.02 (d,  $J = 6.2$  Hz, 3H), 0.83 (s, 3H);  $^{13}\text{C NMR}$  (226 MHz,  $\text{CDCl}_3$ )  $\delta$  209.36, 177.45, 170.66, 170.41, 170.30, 143.73, 123.74, 73.38, 68.67, 65.49, 58.04, 57.15, 52.16, 51.90, 51.67, 50.07, 48.29, 47.64, 44.98, 44.78, 42.33, 40.60, 38.73, 37.92, 36.29, 30.40, 28.22, 24.26, 23.80, 21.29, 21.22, 21.08, 20.83, 19.42, 18.31, 17.17, 14.28.; **ESIHR** (M+Na) calc'd 706.3674, found 706.3702; **FT-IR** 2929, 2090 ( $\text{N}_3$ ), 1744.

*Structural assignment for the azide 4a.*

The structure of azide **4a** was assigned based on the  $^1\text{H}$ - $^1\text{H}$  COSY correlations that are shown in Figure S4. The configuration of the carbon to which the  $\text{N}_3$  group is bound was assigned on the basis of the coupling constant  $^3J_{\text{H}_d\text{-H}_c} = 9.3$  Hz. This coupling constant indicates that  $\text{H}_d$  occupies an axial position on ring C.

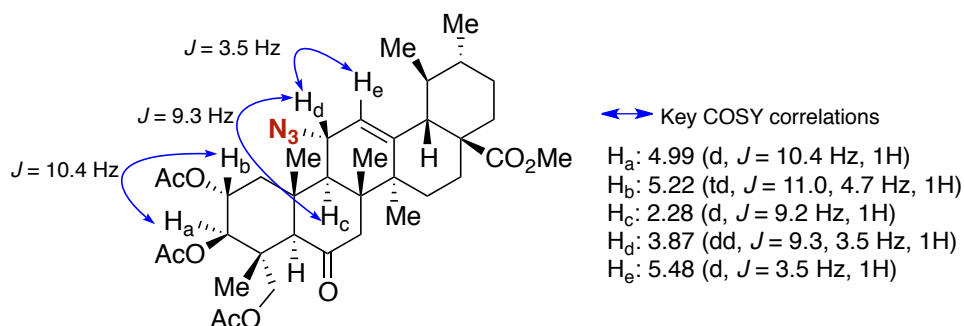

**Figure S4** Key  $^1\text{H}$ - $^1\text{H}$  COSY correlations and coupling constants of **4a**.



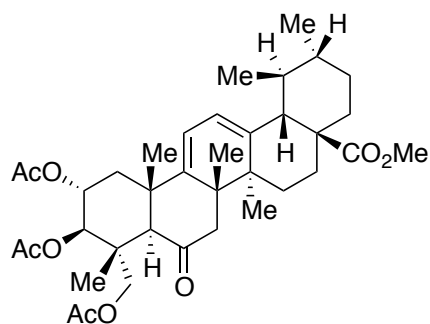

Diene **S15** was obtained in 16% yield as the main side product of the azidation of the madecassic acid derivative.  $^1\text{H NMR}$  (900 MHz,  $\text{CDCl}_3$ )  $\delta$  5.69 (d,  $J = 5.8$  Hz, 1H), 5.66 (d,  $J = 5.8$  Hz, 1H), 5.22 (ddd,  $J = 11.8, 10.3, 4.4$  Hz, 1H), 4.96 (d,  $J = 10.4$  Hz, 1H), 4.29 (d,  $J = 11.3$  Hz, 1H), 3.72 (d,  $J = 11.4$  Hz, 1H), 3.62 (s, 3H), 2.73 (s, 1H), 2.66 (d,  $J = 17.6$  Hz, 1H), 2.41 (dd,  $J = 11.2, 2.0$  Hz, 1H), 2.33 (dd,  $J = 12.6, 4.5$  Hz, 1H),

2.11 (d,  $J = 17.6$  Hz, 1H), 2.04 (s, 3H), 2.02 (s, 3H), 1.97 (s, 3H), 1.90 – 1.81 (m, 2H), 1.78 (m, 1H), 1.74 (dt,  $J = 13.3, 3.4$  Hz, 1H), 1.63 (dd,  $J = 13.6, 4.4$  Hz, 1H), 1.61 (s, 3H), 1.52 (m, 1H), 1.35 (s, 3H), 1.34 – 1.25 (m, 3H), 1.25 (s, 3H), 1.21 – 1.16 (m, 2H), 1.06 (s, 3H), 0.96 (d,  $J = 6.5$  Hz, 3H), 0.93 (s, 3H), 0.87 (d,  $J = 6.5$  Hz, 3H);  $^{13}\text{C NMR}$  (226 MHz,  $\text{CDCl}_3$ )  $\delta$  210.39, 177.73, 170.54, 170.49, 170.40, 148.39, 140.80, 123.63, 115.95, 77.36, 73.73, 69.36, 65.74, 52.70, 51.89, 51.64, 47.56, 47.09, 45.23, 41.88, 41.82, 41.48, 41.07, 38.77, 38.43, 36.18, 30.53, 27.04, 26.20, 24.40, 23.86, 21.37, 21.21, 20.89, 18.75, 17.07, 13.98; **ESIHR** ( $\text{M}+\text{Na}$ ) calc'd 663.3504, found 663.3507.

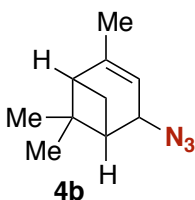

**Azidation of a-pinene:** Azide **4b** was prepared from a-pinene according to the general procedure (A) on a 0.1 mmol scale. EtOAc was used as the solvent, and the reaction was run at 50 °C for 15 hours. The crude azide was purified by flash column chromatography (Hexanes) to give **4b** as a colorless oil in 26% yield (5.0 mg).  $^1\text{H NMR}$  (600 MHz,  $\text{CDCl}_3$ )  $\delta$  5.33 (dq,  $J = 3.5, 1.7$  Hz, 1H), 4.03 (s, 1H), 2.30 (dt,  $J = 9.3, 5.5$  Hz, 1H), 2.27 – 2.21 (m, 1H), 2.05 (td,  $J = 5.6, 1.4$  Hz, 1H), 1.76 (t,  $J = 1.7$  Hz, 3H), 1.46 – 1.35 (m, 1H), 1.34 (s, 3H), 0.88 (s, 3H);  $^{13}\text{C NMR}$  (151 MHz,  $\text{CDCl}_3$ )  $\delta$  150.64, 114.04, 61.63, 47.34, 45.44, 44.84, 28.61, 26.33, 22.75, 20.38. The  $^1\text{H NMR}$  spectral data match those of the reported molecule.<sup>17</sup>

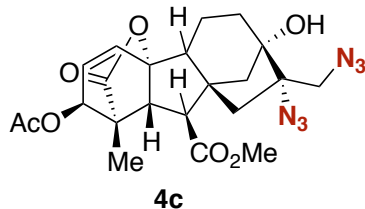

**Azidation of the gibberellic acid derivative:** Azide **4c** was prepared from **S10** according to the general procedure (A) on a 0.1 mmol scale. EtOAc was used as the solvent, and the reaction was run at 50 °C for 15 hours. The crude azide was purified by flash column chromatography (Hexane:EtOAc 65:35) to give **4c**

as a white solid in 56% yield (27.3 mg).  $^1\text{H NMR}$  (600 MHz,  $\text{CDCl}_3$ )  $\delta$  6.36 (d,  $J = 9.3$  Hz, 1H), 5.89 (dd,  $J = 9.3, 3.8$  Hz, 1H), 5.32 (d,  $J = 3.8$  Hz, 1H), 3.80 (s, 3H), 3.66 – 3.56 (m, 2H), 3.30 (d,  $J = 10.7$  Hz, 1H), 2.75 (d,  $J = 10.7$  Hz, 1H), 2.11 (s, 3H), 2.02 – 1.66 (m, 10H), 1.13 (s, 3H);  $^{13}\text{C NMR}$  (151 MHz,  $\text{CDCl}_3$ )  $\delta$  176.95, 172.42, 170.11, 133.64, 129.70, 89.94, 79.55, 73.12, 70.26, 56.08, 53.70, 53.46, 52.73, 52.31, 51.98, 49.07, 45.08, 43.26, 29.34, 20.93, 16.18, 14.38. **FT-IR** 3506, 2951, 2108 ( $\text{N}_3$ ), 1776, 1735; Single crystals suitable for **X-ray** diffraction were obtained by slow vapor diffusion of octane into a solution of **4c** in a mixture of acetone and octane.

#### **D. Trifluoromethylazidation of olefins in natural products**

**General procedure (B) for iron-catalyzed trifluoromethyl azidation of olefins.** In an  $\text{N}_2$  filled glovebox, to a 4 mL vial containing alkene (0.1 mmol) and Togni's reagent (**5**) (1.5-2.0 equiv, 0.15-0.2 mmol) was added EtOAc (0.3 mL). In a separate vial, to the solution of the  $\text{Fe}(\text{OAc})_2(\text{PyBox})$  catalyst (0.5 mL), was added  $\text{TMSN}_3$  (1.2 equiv). Both vials were allowed to stir for 5 min at ambient temperature, at which time the contents of the second vial (containing the Fe catalyst and  $\text{TMSN}_3$ ) was transferred into the first vial. The vial containing the reaction mixture was then sealed with a cap containing a PTFE septum and kept at 23 °C for 24 hours. The crude reaction mixture was then treated with 1 ml of EtOAc. The resulting mixture was filtered through a 30 x 6 mm plug of basic alumina (in a 9 mm pipette) and collected in a 20 ml vial. The basic alumina was washed with 3 x 3.0 mL of EtOAc. The solvent was evaporated from the combined resulting solution, and the product was purified by flash column chromatography on silica gel.

**General guidelines for identifying trifluoromethyl azidation products:** The absence of resonances in the  $^1\text{H}$  and  $^{13}\text{C}$  NMR spectra due to an alkene and the presence of a signal in the  $^{19}\text{F}$  NMR spectrum, as well as the presence of a stretch for an  $\text{N}_3$  group in the IR spectrum indicated that the product resulted from addition of a trifluoromethyl group and an azide to the alkene. The regioselectivity of the addition to the alkene was determined by the splitting pattern of the  $\text{CF}_3$  group in the  $^{19}\text{F}$  NMR spectrum. In addition, the structures of four compounds were determined unambiguously by X-ray diffraction of single crystals.

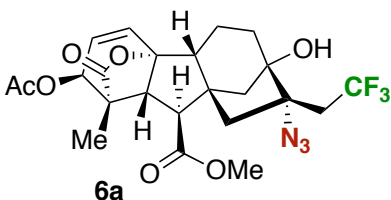

### Trifluoromethylazidation of the gibberellic acid derivative:

Trifluoromethylazide **6a** was prepared from **S10** according to the general procedure (B) on a 0.1 mmol scale using EtOAc as a solvent. The crude azide was purified by flash column chromatography (Hexane:EtOAc 65:35) to give **6a** as a white solid in 75% yield (39.3 mg).

$^1\text{H NMR}$  (600 MHz,  $\text{CDCl}_3$ )  $\delta$  6.36 (d,  $J = 9.4$  Hz, 1H), 5.89 (dd,  $J = 9.3, 3.6$  Hz, 1H), 5.33 (d,  $J = 3.8$  Hz, 1H), 3.79 (s, 3H), 3.32 (d,  $J = 10.6$  Hz, 1H), 2.74 (d,  $J = 10.6$  Hz, 1H), 2.63 – 2.53 (m, 2H), 2.43 (dq,  $J = 15.2, 10.6$  Hz, 1H), 2.11 (s, 3H), 2.08 (d,  $J = 16.0$  Hz, 1H), 2.00 (s, 2H), 1.98 – 1.90 (m, 3H), 1.84 (d,  $J = 15.9$  Hz, 1H), 1.77 – 1.67 (m, 2H), 1.14 (s, 3H);  $^{13}\text{C NMR}$  (151 MHz,  $\text{CDCl}_3$ )  $\delta$  176.98, 172.53, 170.10, 133.52, 129.78, 126.36 (q,  $J = 278.3$  Hz), 89.77, 80.82, 70.31, 70.04, 54.74, 53.84, 52.95, 52.35, 52.24, 48.92, 45.24, 41.80, 37.65 (q,  $J = 28.2$  Hz), 29.40, 20.93, 16.25, 14.35;  $^{19}\text{F NMR}$  (376 MHz,  $\text{CDCl}_3$ )  $\delta$  -59.60 (t,  $J = 10.5$  Hz); **FT-IR** 3510, 2954, 2118 ( $\text{N}_3$ ), 1778, 1735.

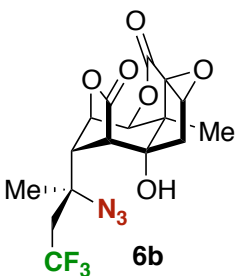

### Trifluoromethylazidation of picrotoxinin:

Trifluoromethylazide **6b** was prepared from picrotoxinin according to the general procedure (B) on a 0.1 mmol scale using EtOAc as a solvent. The crude azide was purified by flash column chromatography (Hexane:acetone 70:30) to give **6b** as a white solid in 78% yield (31.5 mg).

$^1\text{H NMR}$  (400 MHz, Acetone- $d_6$ )  $\delta$  5.39 (s, 1H), 5.16 (t,  $J = 4.1$  Hz, 1H), 5.10 (d,  $J = 3.4$  Hz, 1H), 3.59 (d,  $J = 3.4$  Hz, 1H), 3.14 (t,  $J = 4.4$  Hz, 1H), 3.11 – 2.72 (m, 5H), 2.17 (d,  $J = 15.0$  Hz, 1H), 2.09 (s, 1H), 1.81 (s, 3H), 1.31 (s, 3H);  $^{13}\text{C NMR}$  (101 MHz, Acetone- $d_6$ )  $\delta$  174.33, 170.09, 127.17 (q,  $J = 277.4$  Hz), 86.28, 80.99, 77.66, 73.67, 62.02, 58.34, 58.32, 53.51, 50.79, 48.47, 45.27, 43.82 (q,  $J = 26.4$  Hz), 20.29, 15.82;  $^{19}\text{F NMR}$  (376 MHz, Acetone- $d_6$ )  $\delta$  -59.99 (t,  $J = 11.4$  Hz); **FT-IR** 2924, 2853, 2127 ( $\text{N}_3$ ), 1793. Single crystals suitable for **X-Ray** analysis were obtained by slow evaporation of dichloromethane from a solution of **6b** in a mixture of dichloromethane and octane.

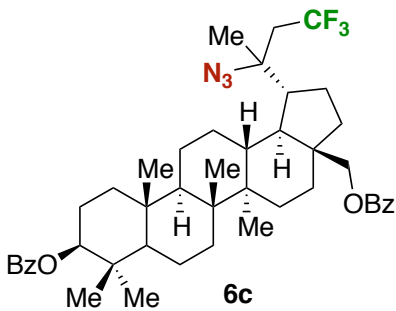

### Trifluoromethylazidation of betulin dibenzoate:

Trifluoromethylazide **6c** was prepared betulin dibenzoate<sup>18</sup> according to the general procedure (B) on a 0.1 mmol scale using EtOAc as a solvent. The crude azide was purified by flash column chromatography (Hexane:ether 90:10) to give **6c** as a white solid in 80% overall yield (61.0 mg). *For the major diastereomer:* <sup>1</sup>H NMR (600 MHz, CDCl<sub>3</sub>) δ 8.14 – 7.92 (m,

4H), 7.70 – 7.49 (m, 2H), 7.44 (dt, *J* = 9.3, 7.8 Hz, 4H), 4.74 (dd, *J* = 11.3, 4.6 Hz, 1H), 4.63 (d, *J* = 11.3 Hz, 1H), 4.03 (d, *J* = 11.2 Hz, 1H), 2.48 – 2.27 (m, 2H), 2.13 – 2.06 (m, 1H), 2.06 – 1.50 (m, 12H), 1.50 – 1.44 (m, 4H), 1.43 (s, 3H), 1.41 – 1.19 (m, 5H), 1.15 (s, 3H), 1.11 (m, 2H), 1.06 (s, 3H), 1.01 (s, 3H), 0.93 (s, 6H), 0.91 – 0.80 (m, 1H); <sup>13</sup>C NMR (151 MHz, CDCl<sub>3</sub>) δ 166.86, 166.40, 133.15, 132.82, 131.18, 130.42, 129.70, 129.67, 128.57, 128.45, 125.83 (q, *J* = 278.6 Hz), 81.69, 63.18, 63.00, 55.51, 50.39, 48.81, 48.59, 47.36, 43.79, 43.73, 43.64 (q, *J* = 26.6 Hz), 41.82, 38.60, 38.37, 37.22, 34.58, 34.37, 30.80, 29.85, 28.45, 28.29, 27.95, 27.51, 23.90, 21.72, 18.38, 16.96, 16.45, 16.41, 15.37; <sup>19</sup>F NMR (376 MHz, CDCl<sub>3</sub>) δ -59.23 (d, *J* = 10.8 Hz); FT-IR 2950, 2107 (N<sub>3</sub>), 1716. Single crystals suitable for X-Ray analysis were obtained by slow evaporation of dichloromethane from a solution of **6c** (major diastereomer) in dichloromethane/octane mixture. *For the minor diastereomer:* <sup>1</sup>H NMR (600 MHz, CDCl<sub>3</sub>) δ 8.11 – 7.98 (m, 4H), 7.56 (m, 2H), 7.45 (m, 4H), 4.74 (dd, *J* = 11.4, 4.8 Hz, 1H), 4.60 (d, *J* = 11.2 Hz, 1H), 4.04 (d, *J* = 11.1 Hz, 1H), 2.32 (m, 2H), 2.15 – 1.67 (m, 9H), 1.58 (m, 5H), 1.54 (s, 3H), 1.50 – 1.18 (m, 8H), 1.14 (s, 3H), 1.13 – 1.06 (m, 3H), 1.04 (s, 3H), 1.01 (s, 3H), 0.93 (s, 6H); <sup>13</sup>C NMR (151 MHz, CDCl<sub>3</sub>) δ 166.91, 166.43, 133.15, 132.84, 131.15, 130.42, 129.70, 129.67, 128.57, 128.45, 126.1 (q, *J* = 279.1 Hz), 81.67, 63.41, 63.30, 55.50, 50.40, 49.21, 48.62, 48.54, 43.78, 41.79, 40.94 (q, *J* = 27.3 Hz), 38.62, 38.36, 37.22, 37.04, 34.57, 34.23, 30.84, 29.18, 28.27, 27.96, 27.47, 23.90, 23.64, 21.76, 18.34, 16.97, 16.44, 16.42, 15.32; <sup>19</sup>F NMR (376 MHz, CDCl<sub>3</sub>) δ -58.82 (t, *J* = 11.0 Hz); FT-IR 2953, 2107 (N<sub>3</sub>), 1716.

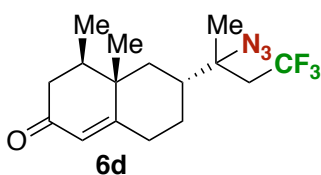

**Trifluoromethylazidation of nootkatone:** Azide **6d** was prepared from nootkatone according to the general procedure (B) on a 0.1 mmol scale. EtOAc was used as the solvent, and the reaction was run at 25 °C for 15 hours. The crude azide was purified by flash

column chromatography (Hexane:EtOAc 65:35) to give **6d** as a white solid in 56% yield (23.1 mg).  $^1\text{H NMR}$  (400 MHz,  $\text{CDCl}_3$ ) for the mixture of diastereomers:  $\delta$  5.74 (d,  $J = 1.7$  Hz, 1H), 2.55 – 2.12 (m, 6H), 2.09 – 1.76 (m, 4H), 1.42 (two overlapping singlets, 3H), 1.24 (m, 1H), 1.07 (s, 3H), 1.04 (d,  $J = 12.8$  Hz, 1H), 0.97 (two overlapping doublets,  $J = 6.9$ , 3H);  $^{13}\text{C NMR}$  (101 MHz,  $\text{CDCl}_3$ ) for the mixture of diastereomers:  $\delta$  199.25, 199.21, 168.85, 168.82, 125.86 (q,  $J = 278.4$  Hz), 125.80 (q,  $J = 278.4$  Hz), 124.93, 124.91, 62.70 (2 overlapping resonances), 42.21, 42.05 (2 overlapping resonances), 41.88, 40.57 (2 overlapping resonances), 40.75 (q,  $J = 27.4$  Hz), 40.22 (q,  $J = 27.4$  Hz), 39.28, 39.25, 39.16, 38.99, 32.51 (2 overlapping resonances), 27.35, 27.27, 20.28, 20.17, 16.82 (2 overlapping resonances), 15.06 (2 overlapping resonances);  $^{19}\text{F NMR}$  (376 MHz,  $\text{CDCl}_3$ ) for the mixture of diastereomers:  $\delta$  -59.15 (t,  $J = 10.9$  Hz), -59.24 (t,  $J = 10.9$  Hz); **ESIHR** (M+H) calc'd 330.1788, found 330.1788; **FT-IR** 3376, 2959, 2108 ( $\text{N}_3$ ), 1664.

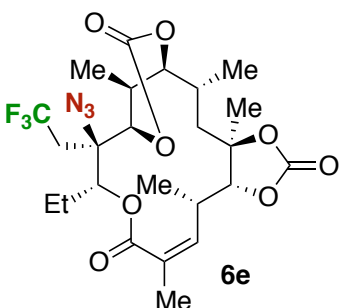

#### Trifluoromethylazidation of the erythronolide derivative **S13**:

Trifluoromethylazide **6e** was prepared from **S13** according to the general procedure (B) on a 0.055 mmol scale using EtOAc as a solvent. The crude azide was purified by flash column chromatography (Hexane:acetone 70:30) to give **6e** as a white solid in 60% yield (18.0 mg).  $^1\text{H NMR}$  (500 MHz,  $\text{CDCl}_3$ )  $\delta$  5.96 (dd,  $J = 9.7, 1.6$  Hz, 1H), 5.29 (bs, 1H), 5.02 (bs, 1H), 4.43 (d,  $J = 10.4$  Hz, 1H), 3.86 (d,  $J = 9.9$  Hz, 1H), 3.15 (bs, 1H), 2.86 (m, 1H), 2.54 (m, 2H), 2.29 (bs, 1H), 1.97 – 1.94 (m, 1H), 1.94 (d,  $J = 1.5$  Hz, 3H), 1.97 (m, 1H), 1.75 (t,  $J = 13.8$  Hz, 1H), 1.67 (dd,  $J = 15.2, 3.5$  Hz, 1H), 1.31 (m, 9H), 1.28 (d,  $J = 7.0$  Hz, 3H), 0.98 (t,  $J = 7.3$  Hz, 3H);  $^{13}\text{C NMR}$  (226 MHz, Acetone- $d_6$ )  $\delta$  167.98, 153.39, 146.51, 138.43, 131.53, 126.88 (q,  $J = 277.6$  Hz), 91.83, 86.80, 83.47, 81.74, 79.00, 69.25, 37.40, 34.47, 33.69 (q,  $J = 28.8$  Hz), 33.44, 28.64, 25.46, 23.10, 17.00, 16.08, 14.16, 13.14, 11.84;  $^{19}\text{F NMR}$  (376 MHz,  $\text{CDCl}_3$ )  $\delta$  -58.35; **FT-IR** 2977, 2919, 2849, 2128 ( $\text{N}_3$ ), 1801, 1788, 1743. Single crystals suitable for **X-Ray** analysis were obtained by slow vapor diffusion of octane into the solution of **6e** in acetone/octane mixture.

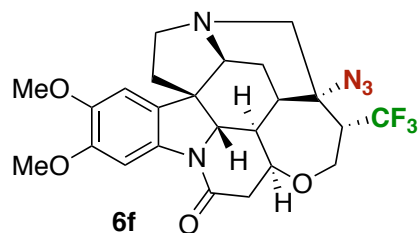

**Trifluoromethylazidation of brucine:** Trifluoromethylazide **6f** was prepared from brucine according to the general procedure (B) on a 0.1 mmol scale using EtOAc as a solvent. The crude azide was purified by flash column chromatography (Hexane:Et<sub>2</sub>O 50:50) to give **6f** as a white solid in 70% yield (35.3 mg). <sup>1</sup>H NMR (600 MHz, CDCl<sub>3</sub>) δ 7.74 (s, 1H), 6.66 (s, 1H), 4.12 (dd, *J* = 13.4, 2.4 Hz, 1H), 4.07 (dt, *J* = 8.2, 5.4 Hz, 1H), 3.89 (d, *J* = 3.8 Hz, 3H), 3.87 (s, 3H), 3.80 (dd, *J* = 13.4, 9.2 Hz, 1H), 3.48 (t, *J* = 3.2 Hz, 1H), 3.30 (d, *J* = 13.7 Hz, 1H), 3.20 (dt, *J* = 12.6, 9.3 Hz, 1H), 2.99 (dd, *J* = 16.0, 8.2 Hz, 1H), 2.90 (ddd, *J* = 12.8, 8.7, 2.2 Hz, 1H), 2.74 (dt, *J* = 14.3, 3.6 Hz, 1H), 2.64 – 2.52 (m, 2H), 2.49 – 2.35 (m, 3H), 2.04 (ddd, *J* = 14.4, 9.4, 2.3 Hz, 1H), 1.75 (dq, *J* = 5.4, 3.7 Hz, 1H), 1.60 (dt, *J* = 14.3, 2.9 Hz, 1H) 1.33 – 1.27 (m, 1H); <sup>13</sup>C NMR (151 MHz, CDCl<sub>3</sub>) δ 168.06, 149.33, 146.75, 134.28, 125.40 (q, *J* = 280.8 Hz), 124.95, 105.17, 100.58, 74.93, 67.72, 64.05, 63.14, 62.53, 58.78, 56.53, 56.20, 55.25 (q, *J* = 22.1 Hz), 53.82, 52.02, 51.43, 45.81, 40.45, 34.73, 28.16; <sup>19</sup>F NMR (565 MHz, CDCl<sub>3</sub>) δ -64.84 (d, *J* = 10.5 Hz); Single crystals suitable for **X-Ray** analysis were obtained by slow evaporation of solution of **6f** in dichloromethane/CHCl<sub>3</sub>/octane mixture.

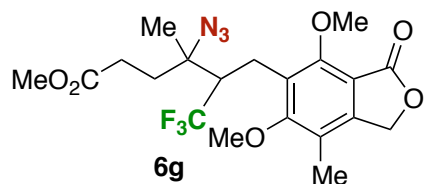

**Trifluoromethylazidation of the mycophenolic acid derivative S5:** Trifluoromethylazide **6g** was prepared from **S5** according to the general procedure (B) on a 0.1 mmol scale using EtOAc as a solvent. The crude azide was purified by flash column chromatography (Hexane:CH<sub>2</sub>Cl<sub>2</sub> 70:30 to 50:50) to give **6g** as a light yellow colored oil in 67% overall yield (30.8 mg). *For the major diastereomer:* <sup>1</sup>H NMR (500 MHz, CDCl<sub>3</sub>) δ 5.15 (s, 2H), 4.12 (s, 3H), 3.81 (s, 3H), 3.70 (s, 3H), 3.21 (dd, *J* = 15.1, 10.1 Hz, 1H), 3.00 – 2.88 (m, 2H), 2.48 (ddd, *J* = 9.5, 6.2, 4.8 Hz, 2H), 2.23 – 2.16 (m, 1H), 2.18 (s, 3H), 2.11 (ddd, *J* = 15.2, 9.6, 6.6 Hz, 1H), 1.52 – 1.44 (s, 3H); <sup>13</sup>C NMR (226 MHz, CDCl<sub>3</sub>) δ 173.26, 168.86, 163.05, 156.84, 147.82, 127.21 (q, *J* = 282.7 Hz), 126.14, 119.70, 112.24, 68.46, 64.11, 62.93, 61.06, 51.98, 48.81 (q, *J* = 22.8 Hz), 34.35, 28.94, 20.98, 20.40, 11.81; <sup>19</sup>F NMR (376 MHz, CDCl<sub>3</sub>) δ -62.09 (d, *J* = 9.1 Hz); **ESIHR** (M) calc'd 482.1509, found 482.1506; **FT-IR** 2953, 2108 (N<sub>3</sub>), 1759.

For the minor diastereomer:  $^1\text{H NMR}$  (500 MHz,  $\text{CDCl}_3$ )  $\delta$  5.15 (s, 2H), 4.14 (s, 3H), 3.82 (s, 3H), 3.70 (s, 3H), 3.18 (dd,  $J = 14.9, 10.3$  Hz, 1H), 3.05 – 2.89 (m, 2H), 2.46 (ddd,  $J = 8.5, 6.8, 1.3$  Hz, 2H), 2.19 (s, 3H), 2.10 – 2.02 (m, 1H), 2.02 – 1.94 (m, 1H), 1.53 (d,  $J = 1.6$  Hz, 3H);  $^{13}\text{C NMR}$  (226 MHz,  $\text{CDCl}_3$ )  $\delta$  173.47, 168.83, 163.01, 156.86, 147.96, 127.22 (q,  $J = 283.2$  Hz), 125.84, 119.58, 112.15, 68.46, 64.00, 62.97, 61.03, 51.97, 50.76 (q,  $J = 22.6$  Hz), 31.85, 28.96, 21.75, 20.87, 11.87;  $^{19}\text{F NMR}$  (376 MHz,  $\text{CDCl}_3$ )  $\delta$  -61.54 (d,  $J = 9.3$  Hz); **ESIHR** (M) calc'd 482.1509, found 482.1503; **FT-IR** 2954, 2108 ( $\text{N}_3$ ), 1759.

### E. Azidation of the cholesterol scaffold.

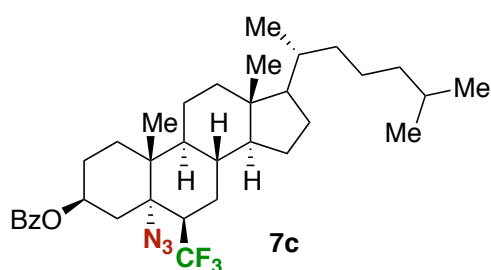

#### Trifluoromethylazidation of the cholesterol benzoate derivative:

Trifluoromethylazide **7c** was prepared from cholesterol benzoate according to the general procedure (B) on a 0.1 mmol scale using EtOAc as a solvent. The crude azide was purified by flash column chromatography (Hexane:acetone 70:30) to give **7c** as a

white solid in 60% yield (36.1 mg).  $^1\text{H NMR}$  (300 MHz,  $\text{CDCl}_3$ )  $\delta$  8.10 – 7.98 (m, 2H), 7.62 – 7.50 (m, 1H), 7.50 – 7.37 (m, 2H), 5.27 (dq,  $J = 10.9, 5.4$  Hz, 1H), 2.48 – 2.19 (m, 3H), 2.12 – 1.94 (m, 2H), 1.93 – 1.15 (m, 18H), 1.19 – 1.04 (m, 6H), 1.12 (s, 3H), 0.90 (d,  $J = 6.5$  Hz, 3H), 0.88 (d,  $J = 1.4$  Hz, 3H), 0.86 (d,  $J = 1.4$  Hz, 3H), 0.67 (s, 3H);  $^{13}\text{C NMR}$  (151 MHz,  $\text{CDCl}_3$ )  $\delta$  166.05, 133.05, 130.65, 129.78, 128.47, 127.07 (q,  $J = 281.7$  Hz), 71.25, 70.64, 56.39, 55.99, 46.17, 46.17 (q,  $J = 26.1$  Hz), 42.92, 39.95, 39.70, 38.52, 36.34, 35.93, 35.26 (q,  $J = 3.2$  Hz), 33.47, 31.86, 28.32, 28.17, 27.10, 26.85, 24.17, 24.03, 22.94, 22.70, 21.23, 18.82, 16.57 (q,  $J = 3.8$  Hz), 12.38;  $^{19}\text{F NMR}$  (376 MHz,  $\text{CDCl}_3$ )  $\delta$  -59.12 (d,  $J = 11.8$  Hz); **EIHR** (M-H) calc'd 601.3810, found 601.3803; **FT-IR** 2950, 2865, 2101 ( $\text{N}_3$ ), 1720.

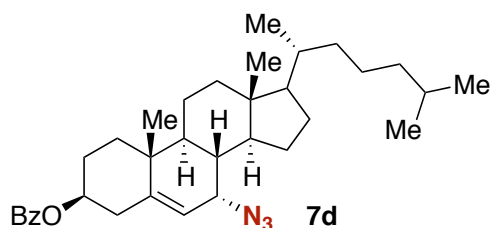

#### Azidation of the cholesterol benzoate derivative:

Azide **7d** was prepared from cholesterol benzoate according to the general procedure (A) on a 0.1 mmol scale using EtOAc as a solvent. The crude azide was purified by flash column chromatography (Hexane:acetone 97:3) to

give **7d** as a white solid in 43% yield (22.9 mg).  $^1\text{H NMR}$  (600 MHz,  $\text{CDCl}_3$ )  $\delta$  8.05 (d,  $J = 8.0$

Hz, 2H), 7.55 (t,  $J = 7.4$  Hz, 1H), 7.44 (t,  $J = 7.6$  Hz, 2H), 5.61 (dd,  $J = 5.4, 1.8$  Hz, 1H), 4.93 (tt,  $J = 10.9, 5.0$  Hz, 1H), 3.68 – 3.49 (m, 1H), 2.67 – 2.52 (m, 2H), 2.11 – 2.04 (m, 1H), 2.02 (dt,  $J = 12.7, 3.5$  Hz, 1H), 1.95 (dt,  $J = 14.0, 3.9$  Hz, 1H), 1.90 (ddd,  $J = 13.4, 9.5, 6.1$  Hz, 1H), 1.76 (dtd,  $J = 15.3, 12.0, 3.8$  Hz, 1H), 1.68 (ddd,  $J = 12.2, 6.8, 2.7$  Hz, 1H), 1.62 (td,  $J = 11.5, 4.2$  Hz, 1H), 1.59 – 0.99 (m, 17H), 1.08 (s, 3H), 0.93 (d,  $J = 6.5$  Hz, 3H), 0.88 (d,  $J = 3.0$  Hz, 3H), 0.87 (d,  $J = 3.0$  Hz, 3H), 0.68 (s, 3H);  $^{13}\text{C NMR}$  (151 MHz,  $\text{CDCl}_3$ )  $\delta$  165.77, 147.30, 132.77, 130.60, 129.51, 128.25, 119.22, 74.25, 58.22, 55.78, 50.42, 43.27, 42.18, 39.48, 38.97, 38.00, 37.48, 36.99, 36.75, 36.10, 35.70, 28.10, 27.99, 27.51, 24.02, 23.70, 22.78, 22.53, 20.73, 18.69, 18.52, 11.62; **ESIHR** (M+Na) calc'd 554.3717, found 554.3714; **FT-IR** 2949, 2096 ( $\text{N}_3$ ), 1718.

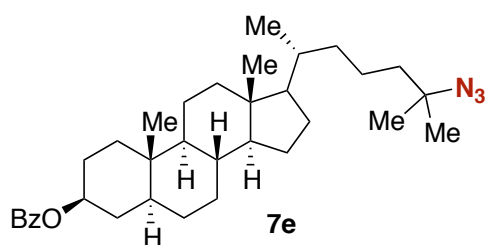

**Azidation of the dihydrocholesterol benzoate derivative:** Azide 7e was prepared according to the general procedure (A) on a 0.1 mmol scale using EtOAc as a solvent. The crude azide was purified by flash column chromatography (first hexane:ether 95:5. The 4

fractions obtained were concentrated and repurified by flash column chromatography using hexanes: $\text{CH}_2\text{Cl}_2$ ) to give 7e as a white solid in 23% yield (12.2 mg).  $^1\text{H NMR}$  (500 MHz,  $\text{CDCl}_3$ )  $\delta$  8.03 (dd,  $J = 8.1, 1.6$  Hz, 2H), 7.59 – 7.48 (m, 1H), 7.43 (t,  $J = 7.7$  Hz, 2H), 4.94 (tt,  $J = 11.1, 4.9$  Hz, 1H), 1.97 (dt,  $J = 12.8, 3.4$  Hz, 1H), 1.86 – 1.27 (m, 19H), 1.25 (s, 6H), 1.24 – 0.95 (m, 8H), 0.92 (d,  $J = 6.6$  Hz, 3H), 0.87 (d,  $J = 4.4$  Hz, 3H), 0.85 – 0.79 (m, 1H), 0.72 – 0.67 (m, 1H), 0.66 (s, 3H);  $^{13}\text{C NMR}$  (151 MHz,  $\text{CDCl}_3$ )  $\delta$  166.29, 132.80, 131.06, 129.65, 128.38, 74.51, 61.97, 56.53, 56.30, 54.34, 44.84, 42.76, 42.04, 40.10, 36.93, 36.29, 35.86, 35.66, 34.26, 32.14, 29.86, 28.77, 28.41, 27.72, 26.22, 26.16, 24.35, 21.36, 20.90, 18.75, 12.45, 12.23; **ESIHR** (M- $\text{N}_2$ +H) calc'd 506.3993, found 506.3984; **FT-IR** 2930, 2850, 2095 ( $\text{N}_3$ ), 1712.

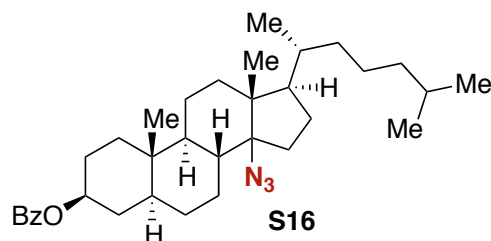

**S16** was obtained as a minor product in 7% yield (3.7 mg) from the azidation of the dihydrocholesterol benzoate.  $^1\text{H NMR}$  (500 MHz,  $\text{CDCl}_3$ )  $\delta$  8.08 – 7.97 (m, 2H), 7.54 (t,  $J = 7.4$  Hz, 1H), 7.43 (t,  $J = 7.7$  Hz, 2H), 4.94 (tt,  $J = 11.0, 4.9$  Hz, 1H), 2.00 – 1.92 (m, 1H), 1.92 – 1.13 (m, 26H), 1.13 – 1.05 (m, 1H), 1.04 (s, 3H), 0.97 (m, 2H), 0.89 (d,  $J = 6.3$  Hz, 3H),



0.88 (d,  $J = 2.2$  Hz, 3H), 0.88 (s, 3H), 0.87 (d,  $J = 1.5$  Hz, 3H);  $^{13}\text{C}$  NMR (151 MHz,  $\text{CDCl}_3$ )  $\delta$  166.28, 132.86, 131.01, 129.67, 128.41, 79.58, 74.23, 56.72, 49.59, 48.28, 44.39, 43.25, 40.25, 39.67, 37.07, 36.15, 34.29, 34.02, 33.06, 28.76, 28.76, 28.58, 28.11, 27.57, 25.39, 24.58, 22.87, 22.81, 21.15, 20.99, 16.97, 12.32; ESIHR (M-N<sub>2</sub>+H) calc'd 506.3993, found 506.3996; FT-IR 2950, 2866, 2099 (N<sub>3</sub>), 1715.

Key  $^1\text{H}$ - $^{13}\text{C}$  HMBC correlations that were used to assign the structure are shown in Figure S5.

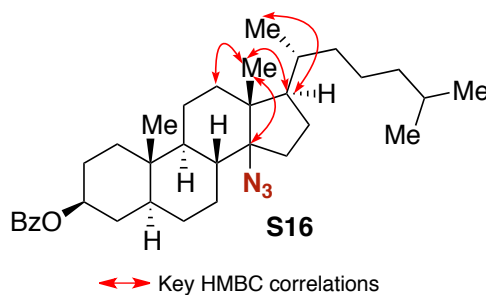

Figure S5 Key HMBC correlations for S16.

## F. Derivatization of azides.

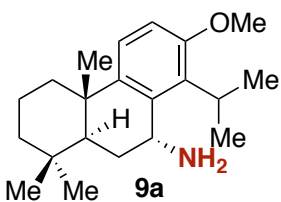

**Preparation of amine 9a:** In a 4 mL vial, totarol azide **2g** (dr = 5:1, 8.0 mg, 0.023 mmol, 1 equiv) was dissolved in THF (0.3 mL). A 1 M solution of  $\text{Me}_3\text{P}$  (500  $\mu\text{l}$ , 0.500 mmol, 21 equiv) was added, followed by  $\text{H}_2\text{O}$  (4.2  $\mu\text{l}$ , 0.23 mmol, 10 equiv). The reaction mixture was stirred at ambient temperature for 24 hours. The volatile materials were evaporated using a stream of  $\text{N}_2$ , and the crude amine was purified by flash column chromatography (hexanes: $\text{Et}_3\text{N}$  98:2) to give **9a** in 78% yield (7.4 mg).  $^1\text{H}$  NMR (600 MHz,  $\text{CDCl}_3$ )  $\delta$  7.12 (d,  $J = 8.8$  Hz, 1H), 6.78 (d,  $J = 8.8$  Hz, 1H), 4.29 (dd,  $J = 4.9, 1.9$  Hz, 1H), 3.78 (s, 3H), 3.53 – 3.40 (m, 1H), 2.26 (dd,  $J = 12.8, 3.7$  Hz, 1H), 1.98 – 1.91 (m, 1H), 1.76 (dd,  $J = 13.8, 2.7$  Hz, 2H), 1.67 (dd,  $J = 12.9, 1.6$  Hz, 1H), 1.62 (m, 1H), 1.51 (m, 1H), 1.49 – 1.43 (m, 1H), 1.41 (d,  $J = 7.0$  Hz, 3H), 1.37 (dd,  $J = 13.0, 3.9$  Hz, 1H), 1.32 (d,  $J = 7.0$  Hz, 3H), 1.31 – 1.24 (m, 3H), 1.13 (s, 3H), 0.99 (s, 3H), 0.92 (s, 3H), 0.90 – 0.83 (m, 1H);  $^{13}\text{C}$  NMR (151 MHz,  $\text{CDCl}_3$ )  $\delta$  157.21, 142.06, 137.40, 134.36, 123.53, 111.17, 55.15, 47.11, 44.24, 41.61, 39.36, 38.77, 33.35, 33.00, 29.24, 28.24, 25.38, 21.92, 21.18, 21.15, 19.73; ESIHR (M+H) calc'd 316.2635, found 316.2594.

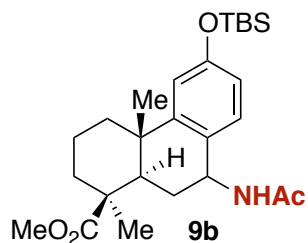

**Preparation of acetamide 9b:** In a 4 mL vial, the azide **2i** (dr = 5:1, 11.0 mg, 0.0248 mmol, 1 equiv) was dissolved in THF (0.3 mL). A 1M solution of Me<sub>3</sub>P (500 μl, 0.500 mmol, 20 equiv) was added followed by H<sub>2</sub>O (4.5 μl, 0.25 mmol, 10 equiv). The reaction mixture was stirred at ambient temperature for 24 hours. The volatile materials

were evaporated using a stream of N<sub>2</sub>, and the crude amine was kept under high vacuum for 2 hours. This crude amine was then dissolved in a mixture of pyridine (0.6 mL) and Ac<sub>2</sub>O (0.3 mL) and allowed to stir for 15 hours. Excess pyridine and Ac<sub>2</sub>O were removed under high vacuum, and the residue was purified by flash column chromatography (hexanes:EtOAc 80:20) to give **9b** in 63% yield (7.2 mg). <sup>1</sup>H NMR (400 MHz, CDCl<sub>3</sub>) δ 7.05 (d, *J* = 8.4 Hz, 1H), 6.73 (d, *J* = 2.5 Hz, 1H), 6.65 (dd, *J* = 8.3, 2.4 Hz, 1H), 5.69 (d, *J* = 7.0 Hz, 1H), 5.05 (t, *J* = 5.5 Hz, 1H), 3.64 (s, 3H), 2.39 (d, *J* = 14.6 Hz, 1H), 2.32 (d, *J* = 13.6 Hz, 1H), 2.23 – 2.11 (m, 2H), 1.99 (s, 3H), 1.35 (td, *J* = 13.3, 4.0 Hz, 1H), 1.29 – 1.22 (m, 2H), 1.20 (s, 3H), 1.16 – 1.02 (m, 2H), 0.97 (s, 12H), 0.17 (dd, *J* = 4.3, 1.6 Hz, 6H); <sup>13</sup>C NMR (151 MHz, CDCl<sub>3</sub>) δ 177.72, 168.84, 155.54, 150.48, 131.44, 126.94, 118.65, 116.88, 51.45, 48.40, 47.41, 43.66, 39.37, 38.52, 37.83, 28.45, 27.36, 25.86, 23.71, 22.05, 19.95, 18.39, -4.21, -4.22; ESIHR (M+H) calc'd 460.2878, found.

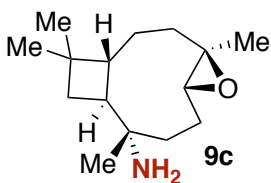

**Preparation of amine 9c:** Caryophyllene azide **3i** (20.0 mg, 0.0759 mmol, 1 equiv) was dissolved in EtOAc (1 mL) in a 20 mL vial. Pd/C (10%, 16.2 mg, 0.0152 mmol, 0.2 equiv) was added, vial was closed with septa and a balloon containing hydrogen was attached. The reaction

mixture was allowed to stir at ambient temperature for 20 hours. Pd/C was removed by filtration and washed with EtOAc (2 x 5 mL). The combined EtOAc solution was concentrated to yield amine **9c** in 98% yield (17.7 mg). <sup>1</sup>H NMR (600 MHz, CDCl<sub>3</sub>) δ 2.82 (dd, *J* = 9.7, 5.7 Hz, 1H), 2.18 (ddt, *J* = 14.2, 12.3, 6.2 Hz, 1H), 2.08 (dt, *J* = 12.8, 3.6 Hz, 1H), 1.98 (q, *J* = 9.2 Hz, 1H), 1.75 – 1.61 (m, 4H), 1.56 (m, 2H), 1.53 – 1.30 (m, 5H), 1.29 (s, 3H), 1.21 (s, 3H), 0.96 (s, 3H), 0.94 (s, 3H); <sup>13</sup>C NMR (151 MHz, CDCl<sub>3</sub>) δ 61.01, 59.42, 53.96, 53.40, 47.36, 40.45, 40.44, 35.62, 31.89, 30.26, 29.09, 25.32, 23.32, 21.68, 16.37; ESIHR (M+H) calc'd 238.2165, found 238.2177.

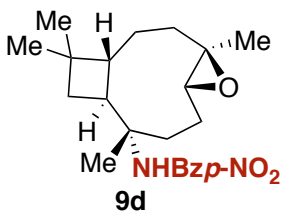

**Preparation of amide 9d:** Caryophyllene oxide amine **9c** (11.0 mg, 0.0463 mmol, 1 equiv) was dissolved in CH<sub>2</sub>Cl<sub>2</sub> (1.0 mL) and cooled to 0 °C. Pyridine (19 μl, 0.23 mmol, 5 equiv) and a small crystal of DMAP, followed by *p*-NO<sub>2</sub>BzCl (12.9 mg, 0.0695 mmol, 1.5 equiv), were added, and the cooling bath was removed. The reaction mixture

was stirred at ambient temperature for 24 hours then diluted with ether (30 mL). The organic layer was washed with a saturated solution of NaHCO<sub>3</sub> (15 mL) and dried over MgSO<sub>4</sub>. MgSO<sub>4</sub> was removed by filtration and the resulting solution was concentrated. The crude amide was purified by flash column chromatography to give **9d** in 92% yield as off white solid (16.4 mg). <sup>1</sup>H NMR (500 MHz, CDCl<sub>3</sub>) δ 8.25 (d, *J* = 8.8 Hz, 2H), 7.79 (d, *J* = 8.7 Hz, 2H), 5.87 (s, 1H), 2.88 (q, *J* = 9.3 Hz, 1H), 2.82 (dd, *J* = 9.6, 5.5 Hz, 1H), 2.46 – 2.21 (m, 3H), 2.12 (dt, *J* = 13.0, 3.6 Hz, 1H), 1.78 – 1.54 (m, 6H), 1.53 (s, 3H), 1.46 – 1.38 (m, 1H), 1.36 (s, 3H), 1.00 (s, 3H), 0.98 (s, 3H); <sup>13</sup>C NMR (151 MHz, CDCl<sub>3</sub>) δ 164.45, 149.55, 141.56, 127.90, 123.98, 60.96, 60.19, 59.38, 48.74, 46.15, 40.31, 36.90, 35.92, 32.06, 30.34, 29.00, 24.98, 23.42, 18.69, 16.53; ESIHR (M+H) calc'd 387.2278, found 387.2274.

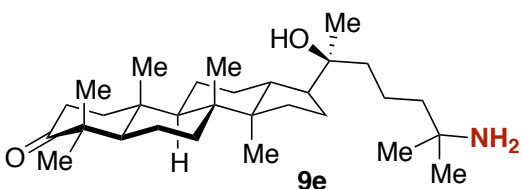

**Preparation of amine 9e:** Azide **3e** (10.0 mg, 0.0206 mmol, 1 equiv) was dissolved in EtOAc (1 mL). Pd/C (10%, 4.4 mg, 0.041 mmol, 0.2 equiv) was added, and a balloon containing hydrogen was

attached. The reaction mixture was allowed to stir at ambient temperature for 20 hours. The Pd/C was removed by filtration, and the resulting solution was concentrated to yield amine **9e** in 99% yield (9.4 mg). <sup>1</sup>H NMR (500 MHz, CDCl<sub>3</sub>) δ 2.50 (ddd, *J* = 16.5, 9.5, 7.7 Hz, 1H), 2.42 (ddd, *J* = 15.5, 7.7, 4.4 Hz, 1H), 1.90 (ddd, *J* = 12.5, 7.6, 4.4 Hz, 1H), 1.85 – 1.18 (m, 26H), 1.43 (s, 3H), 1.42 (s, 3H), 1.12 (s, 3H), 1.07 (s, 3H), 1.03 (s, 3H), 1.01 (s, 3H), 0.93 (s, 3H), 0.87 (s, 3H); <sup>13</sup>C NMR (151 MHz, CDCl<sub>3</sub>) δ 218.29, 75.86, 55.42, 50.51, 50.41, 50.10, 47.56, 42.62, 41.21, 40.42, 40.36, 40.02, 36.94, 34.63, 34.24, 31.35, 27.63, 26.82, 26.47, 25.68, 25.17, 24.67, 22.16, 21.14, 19.76, 18.08, 16.56, 16.18, 15.31, 14.28; ESIHR (M+H) calc'd 460.4149, found 460.4154.

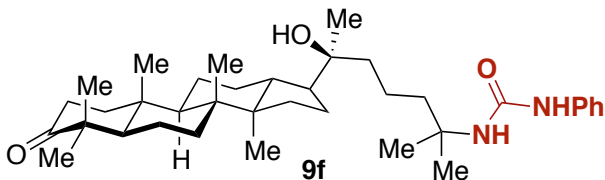

**Preparation of urea 9f:** Dipterocarpol amine **9e** (7.0 mg, 0.0152 mmol, 1 equiv) was dissolved in CH<sub>2</sub>Cl<sub>2</sub> (1.0 mL) and cooled to 0 °C. Pyridine (13 μl, 0.16 mmol, 11 equiv),

followed by phenylisocyanate (5 μl, 0.05 mmol, 3 equiv) was added, and the cooling bath was removed. The reaction mixture was stirred at ambient temperature for 24 hours, then diluted with ether (30 mL) and washed with a saturated solution of NaHCO<sub>3</sub> (15 mL). The ether layer was dried over MgSO<sub>4</sub>, filtered, and concentrated. The crude urea was purified by flash column chromatography to give **9f** in 83% yield as white solid (7.3 mg). <sup>1</sup>H NMR (400 MHz, CDCl<sub>3</sub>) δ 7.32 – 7.26 (m, 4H), 7.09 – 6.99 (m, 1H), 6.28 (s, 1H), 4.63 (s, 1H), 2.56 – 2.36 (m, 2H), 1.88 (ddd, *J* = 12.7, 7.5, 4.5 Hz, 1H), 1.84 – 1.15 (m, 24H), 1.33 (s, 3H), 1.33 (s, 3H) 1.12 (s, 3H), 1.08 (s, 3H), 1.03 (s, 3H), 0.98 (s, 3H), 0.93 (s, 3H), 0.86 (s, 3H); <sup>13</sup>C NMR (151 MHz, DMSO) δ 218.32, 154.99, 138.87, 129.43, 123.85, 121.11, 75.79, 55.52, 53.66, 50.40, 50.22, 50.13, 47.60, 42.61, 41.48, 40.58, 40.40, 40.03, 36.96, 34.68, 34.28, 31.31, 29.85, 27.75, 27.63, 26.83, 25.51, 25.06, 22.16, 21.17, 19.78, 18.35, 16.49, 16.15, 15.33; **ESIHR** (M+Na) calc'd 601.4340, found 601.4343.

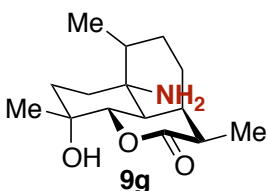

**Preparation of amine 9g:** Azide **3f** (10.0 mg, 0.0341 mmol, 1 equiv) was dissolved in MeOH (0.5 mL). PtO<sub>2</sub> (1.6 mg, 0.0068 mmol, 0.2 equiv) was added, and a balloon containing hydrogen was attached. The reaction mixture was allowed to stir at ambient temperature for 20 hours.

PtO<sub>2</sub> was removed by filtration and the resulting solution was concentrated. The crude amine was purified by flash column chromatography (CHCl<sub>3</sub>:MeOH:Et<sub>3</sub>N 97:2:1) to yield amine **9g** in 86% yield (7.8 mg). <sup>1</sup>H NMR (500 MHz, CDCl<sub>3</sub>) δ 4.34 (d, *J* = 11.8 Hz, 1H), 2.70 – 2.57 (m, 1H), 2.33 (ddt, *J* = 13.6, 5.8, 3.9 Hz, 1H), 2.11 (dd, *J* = 11.7, 3.6 Hz, 1H), 1.83 – 1.36 (m, 12H), 1.34 (s, 3H), 1.21 (d, *J* = 7.3 Hz, 3H), 0.83 (d, *J* = 6.7 Hz, 3H); <sup>13</sup>C NMR (151 MHz, CDCl<sub>3</sub>) δ 175.00, 81.00, 70.27, 53.99, 44.61, 40.39, 33.86, 33.12, 32.58, 30.28, 29.82, 27.16, 22.81, 14.55, 13.53; **ESIHR** (M+H) calc'd 268.1907, found 268.1890, (2M+H) calc'd 535.3742, found 535.3722.

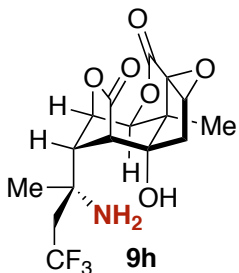

**Preparation of picrotoxinin amine 9h:** Picrotoxinin azide **6b** (18.0 mg, 0.0449 mmol, 1 equiv) was dissolved in MeOH (1 mL). PtO<sub>2</sub> (2.04 mg, 0.00897 mmol, 0.2 equiv) was added, and a balloon containing hydrogen was attached. The reaction mixture was allowed to stir at ambient temperature for 20 hours. PtO<sub>2</sub> was removed by filtration, and the resulting solution was concentrated to yield amine **9h** in 98% yield (16.5 mg). <sup>1</sup>H

**NMR** (400 MHz, Acetone-*d*<sub>6</sub>) δ 5.28 – 5.10 (m, 2H), 3.64 – 3.56 (m, 1H), 3.09 (t, *J* = 4.3 Hz, 1H), 2.97 – 2.77 (m, 3H), 2.73 (dd, *J* = 14.8, 3.5 Hz, 1H), 2.11 – 2.06 (m, 3H), 1.99 (d, *J* = 14.9 Hz, 1H), 1.57 – 1.50 (s, 3H), 1.25 (s, 3H); <sup>13</sup>C **NMR** (151 MHz, Acetone-*d*<sub>6</sub>) δ 174.80, 170.12, 127.47 (q, *J* = 278.0 Hz), 85.60, 80.41, 78.10, 74.23, 62.80, 54.41, 51.38, 50.39, 48.45, 45.09 (q, *J* = 25.7 Hz), 43.93, 26.28 (q, *J* = 1.27 Hz), 16.52; <sup>19</sup>F **NMR** (376 MHz, Acetone-*d*<sub>6</sub>) δ -59.25 (t, *J* = 11.5 Hz); **ESIHR** (M+Na) calc'd 400.0978, found 400.0932.

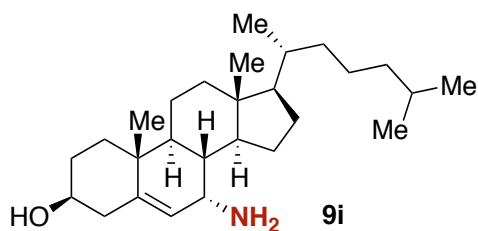

**Preparation of amine 9i:** In an N<sub>2</sub> filled glovebox, in a 4 mL vial, azide **7e** (14.0 mg, 0.0263 mmol, 1 equiv) was dissolved in THF (1.0 mL), and LiAlH<sub>4</sub> (3.0 mg, 0.079 mmol, 3 equiv) was added at ambient temperature.

The vial was sealed with a PTFE lined cap and heated at 65 °C for 6 hours. The reaction mixture was cooled to ambient temperature and sequentially treated with H<sub>2</sub>O (3 μl), a 20% NaOH solution (3 μl), and H<sub>2</sub>O (9 μl). The solids were removed by filtration and the resulting solution was concentrated. The crude mixture was purified by flash column chromatography (CHCl<sub>3</sub>:MeOH:Et<sub>3</sub>N 95:4:1) to yield **9i** in 77% yield (8.1 mg). The <sup>1</sup>H and <sup>13</sup>C **NMR** data match those of the reported molecule.<sup>19</sup>

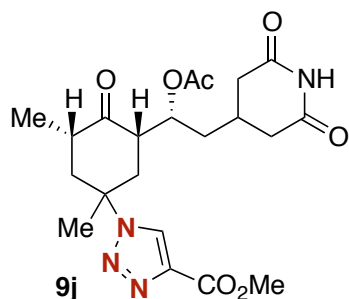

**Preparation of triazole 9j:** Cycloheximide azide **3a** (8.0 mg, 0.022 mmol, 1 equiv) was dissolved in methyl propiolate (400 μl, 4.39 mmol, 200 equiv) and heated to 65 °C. The reaction mixture was stirred at this temperature for 4 hours and concentrated. The crude product was purified by flash column chromatography (hexanes:EtOAc 30:70) to give **9j** in 71% yield (7.0 mg). <sup>1</sup>H **NMR**

(500 MHz, CDCl<sub>3</sub>) δ 8.31 (s, 1H), 8.10 – 7.92 (m, 1H), 5.41 (ddd, *J* = 9.4, 6.8, 3.2 Hz, 1H), 3.98

(s, 3H), 3.07 (dt,  $J = 14.4, 4.6$  Hz, 1H), 2.91 (ddd,  $J = 17.3, 4.3, 1.8$  Hz, 1H), 2.84 (dt,  $J = 14.7, 4.8$  Hz, 1H), 2.68 – 2.56 (m, 2H), 2.45 – 2.20 (m, 3H), 2.15 (dq,  $J = 9.5, 4.7$  Hz, 1H), 2.10 (s, 3H), 2.08 – 1.90 (m, 2H), 1.76 – 1.62 (m, 2H), 1.60 (s, 3H), 1.03 (d,  $J = 6.4$  Hz, 3H);  $^{13}\text{C}$  NMR (126 MHz,  $\text{CDCl}_3$ )  $\delta$  208.91, 171.71, 171.61, 170.69, 161.26, 140.78, 125.52, 68.28, 62.31, 52.59, 48.75, 46.25, 40.61, 39.12, 38.73, 38.28, 37.05, 31.29, 27.26, 21.17, 13.81; **ESIHR** (M+Na) calc'd 471.1850, found 471.1840.

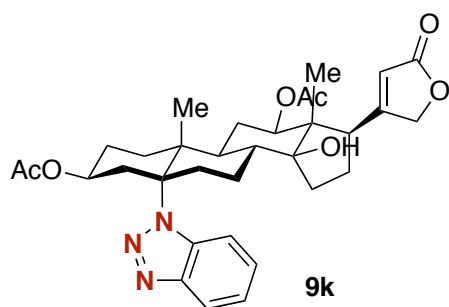

**Preparation of benzotriazole 9k:** In an  $\text{N}_2$  filled glovebox to the solution of azide **3d** (8.7 mg, 0.017 mmol, 1 equiv) and 2-(trimethylsilyl)phenyl triflate (7.6 mg, 0.025 mmol, 1.5 equiv) in acetonitrile was added  $\text{CsF}$  (7.7 mg, 0.051 mmol, 3 equiv). The reaction mixture was stirred at ambient temperature for 48 hours. The solids were removed by filtration, and the resulting solution was

concentrated. The crude product was purified by preparative thin layer chromatography (hexane:EtOAc 70:30) to give **9k** in 37% yield (3.7 mg).  $^1\text{H}$  NMR (500 MHz,  $\text{CDCl}_3$ )  $\delta$  8.10 (d,  $J = 8.3$  Hz, 1H), 7.68 (d,  $J = 8.5$  Hz, 1H), 7.51 – 7.41 (m, 1H), 7.38 (t,  $J = 7.6$  Hz, 1H), 5.80 (d,  $J = 1.8$  Hz, 1H), 4.81 (dd,  $J = 18.0, 1.8$  Hz, 1H), 4.75 – 4.65 (m, 2H), 3.90 (p,  $J = 6.0$  Hz, 1H), 3.38 (td,  $J = 12.4, 3.1$  Hz, 1H), 3.17 – 3.04 (m, 1H), 2.97 – 2.80 (m, 2H), 2.57 (dt,  $J = 14.5, 3.4$  Hz, 1H), 2.21 – 1.64 (m, 16H), 1.39 (s, 3H), 1.34 – 1.22 (m, 4H), 0.91 (s, 3H), 0.23 (qd,  $J = 13.4, 3.6$  Hz, 1H);  $^{13}\text{C}$  NMR (151 MHz,  $\text{CDCl}_3$ )  $\delta$  174.48, 173.58, 170.61, 170.08, 146.42, 131.96, 126.91, 124.07, 120.76, 118.02, 113.28, 85.58, 73.46, 71.70, 69.34, 54.35, 46.01, 41.56, 40.96, 36.19, 36.15, 32.81, 31.12, 29.47, 27.51, 27.33, 26.49, 21.37, 21.37, 21.27, 19.28, 10.62 (one carbon was not observed because the signal overlapped with that of the  $\text{CDCl}_3$ ). **ESIHR** (M+Na) calc'd 614.2837, found 614.2825.

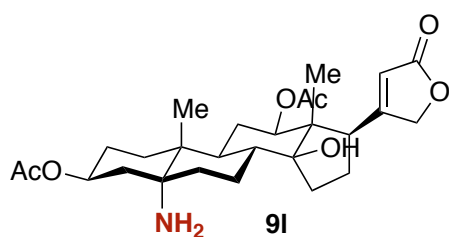

Under an  $\text{N}_2$  atmosphere, finely grinded  $\text{CuSO}_4$  (1.4 mg, 0.0054 mmol, 0.2 equiv.) and  $\text{NaBH}_4$  (20.5 mg, 0.543 mmol, 20 equiv.) were added to dry MeOH (0.5 mL) that was cooled to 0 °C. A dark suspension formed. Then, a solution of the azide **3d** (14.0 mg, 0.0272 mmol, 1 equiv)

in THF (0.5 mL) was added dropwise to the above mixture at the same temperature. The resulting mixture was allowed to warm to ambient temperature slowly, and the reaction mixture was stirred until the substrate **3d** was completely consumed. Water (2 mL) was added to quench the reaction. The mixture was diluted with ethyl acetate (30 mL), and the organic layer was washed with saturated solution of NaHCO<sub>3</sub> (15 mL). The organic layer was dried over Na<sub>2</sub>SO<sub>4</sub>, filtered and concentrated. The residue was purified by flash column chromatography on silica gel (hexanes:acetone 70:40 with 1% Et<sub>3</sub>N) to yield **9l** (11.2 mg, 84% yield). <sup>1</sup>H NMR (600 MHz, CDCl<sub>3</sub>) δ 5.84 (s, 1H), 5.15 (tt, *J* = 11.0, 5.5 Hz, 1H), 4.87 (dd, *J* = 18.0, 1.8 Hz, 1H), 4.77 (dd, *J* = 17.9, 1.8 Hz, 1H), 4.62 (dd, *J* = 11.8, 4.3 Hz, 1H), 2.89 (dd, *J* = 9.5, 6.4 Hz, 1H), 2.20 – 2.12 (m, 1H), 2.08 (s, 3H), 2.05-1.99 (m, 1H), 2.01 (s, 3H), 1.98 – 1.86 (m, 2H), 1.85 – 1.79 (m, 1H), 1.76 – 1.49 (m, 10H), 1.41 – 1.34 (m, 2H), 1.30 – 1.21 (m, 1H), 1.20 – 1.15 (m, 1H), 1.00 (s, 3H), 0.89 (s, 3H); <sup>13</sup>C NMR (151 MHz, CDCl<sub>3</sub>) δ 174.36, 173.42, 170.80, 170.77, 118.19, 85.95, 77.55, 73.43, 70.33, 54.39, 54.15, 46.12, 40.99, 40.70, 38.76, 37.51, 34.97, 33.29, 30.61, 27.35, 26.98, 26.74, 21.54, 21.36, 21.17, 15.60, 10.54; **ESIHR** (M+H) calc'd 490.2799, found 490.2790.

## G. References

- (1) Zhdankin, V. V.; Krasutsky, A. P.; Kuehl, C. J.; Simonsen, A. J.; Woodward, J. K.; Mismash, B.; Bolz, J. T. Preparation, X-ray Crystal Structure, and Chemistry of Stable Azidoiodinanes - Derivatives of Benziodoxole. *J. Am. Chem. Soc.* **1996**, *118*, 5192–5197.
- (2) Akai, S.; Okuno, T.; Egi, M.; Takada, T.; Tohma, H.; Kita, Y. Preparation of novel cyclic hypervalent iodine(III) compounds having azido, cyano, and nitrate ligands. *Heterocycles* **1996**, *42*, 47-51.
- (3) Kolb, H. C.; Finn, M. G.; Sharpless, K. B. Click chemistry: Diverse chemical function from a few good reactions. *Angew. Chem. Int. Ed.* **2001**, *40*, 2004-2021.
- (4) Kolb, H. C.; Sharpless, K. B. The growing impact of click chemistry on drug discovery. *Drug. Discov. Today* **2003**, *8*, 1128-1137.
- (5) Covarrubias-Zuniga, A.; Gonzalez-Lucas, A.; Dominguez, M. M. Total synthesis of mycophenolic acid. *Tetrahedron* **2003**, *59*, 1989-1994.
- (6) Sejbal, J.; Klinot, J.; Budesinsky, M.; Protiva, J. Triterpenes .97. Functionalization of 3-Beta,28-Lupanediol Diacetate with Chromium(Vi) Oxide. *Collect. Czech. Chem. C.* **1991**, *56*, 2936-2949.
- (7) Napoletano, M.; Moriggi, E.; Mereu, A.; Ornaghi, F.; Morazzoni, G.; Longoni, R.; Pacchetti, L.; Pellacini, F. Macrolide Compounds Endowed with Antiinflammatory Activity. WO/2004/013153. 2004
- (8) Peng, Z. H.; Woerpel, K. A. [3+2] Annulation of allylic silanes in acyclic stereocontrol: Total synthesis of (9S)-dihydroerythronolide A. *J. Am. Chem. Soc.* **2003**, *125*, 6018-6019.
- (9) Sharma, A.; Hartwig, J. F. Metal-Catalysed Azidation of Tertiary C-H Bonds Suitable for Late-Stage Functionalization. *Nature* **2015**, *517*, 600–604.
- (10) Dallery, L.; Bertigny, J. P.; Doussot, J.; Garreau, R.; Guy, A.; Platzer, N. H-1 and C-13 NMR study of a series of C-9-substituted 19-norsteroids. *J. Phys. Org. Chem.* **2002**, *15*, 14-20.

- (11) Fier, P. S.; Hartwig, J. F. Synthesis of Difluoromethyl Ethers with Difluoromethyltriflate. *Angew. Chem. Int. Ed.* **2013**, *52*, 2092-2095.
- (12) Huang, X.; Bergsten, T. M.; Groves, J. T. Manganese-Catalyzed Late-Stage Aliphatic C-H Azidation. *J. Am. Chem. Soc.* **2015**, *137*, 5300–5303.
- (13) Guy, A.; Lemor, A.; Doussot, J.; Lemaire, M. Selective conversion of benzylic carbon-hydrogen bonds to an amine function by oxidative nucleophilic substitution. *Synthesis* **1988**, *11*, 900-902.
- (14) Christner, C.; Wyrwa, R.; Marsch, S.; Kullertz, G.; Thiericke, R.; Grabley, S.; Schumann, D.; Fischer, G. Synthesis and cytotoxic evaluation of cycloheximide derivatives as potential inhibitors of FKBP12 with neuroregenerative properties. *J. Med. Chem.* **1999**, *42*, 3615-3622.
- (15) Tori, M.; Tsuyuki, T.; Takahashi, T. Reaction of Dammarane Derivatives - Reactions Involving C-20 Carbonium-Ions. *Bull. Chem. Soc. Jpn.* **1977**, *50*, 3349-3359.
- (16) Nii, K.; Tagami, K.; Kijima, M.; Munakata, T.; Ooi, T.; Kusumi, T. Acid-catalyzed reactions of sarcophytoxide, a marine cembranoid: An apparently enantio-directive reaction, unusual products and stereochemical reconsideration of epoxide-ketone rearrangement. *Bull. Chem. Soc. Jpn.* **2008**, *81*, 562-573.
- (17) Stutz, A.; Zbiral, E. Transfer-Reactions by Means of Pb(Oac)<sub>4</sub>-N(N<sub>3</sub>)N, .9. Contribution to Reactivity of Bridged Olefins .2. *Liebigs Ann. Chem.* **1972**, *765*, 34-46.
- (18) Yang, S. J.; Liu, M. C.; Xiang, H. M.; Zhao, Q.; Xue, W.; Yang, S. Synthesis and in vitro antitumor evaluation of betulin acid ester derivatives as novel apoptosis inducers. *Eur. J. Med. Chem.* **2015**, *102*, 249-255.
- (19) Choucair, B.; Dherbomez, M.; Roussakis, C.; El Kihel, L. Synthesis of spermidinylcholestanol and spermidinylcholesterol, squalamine analogues. *Tetrahedron* **2004**, *60*, 11477-11486.



## H. NMR Spectra

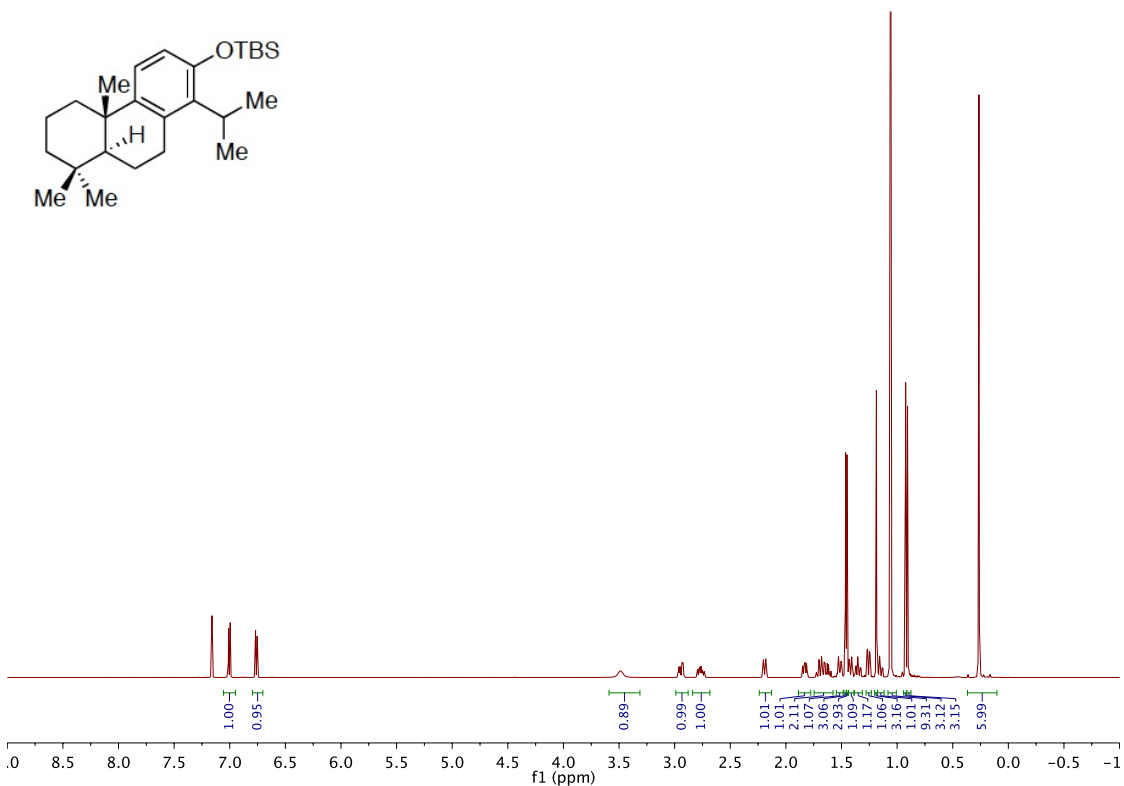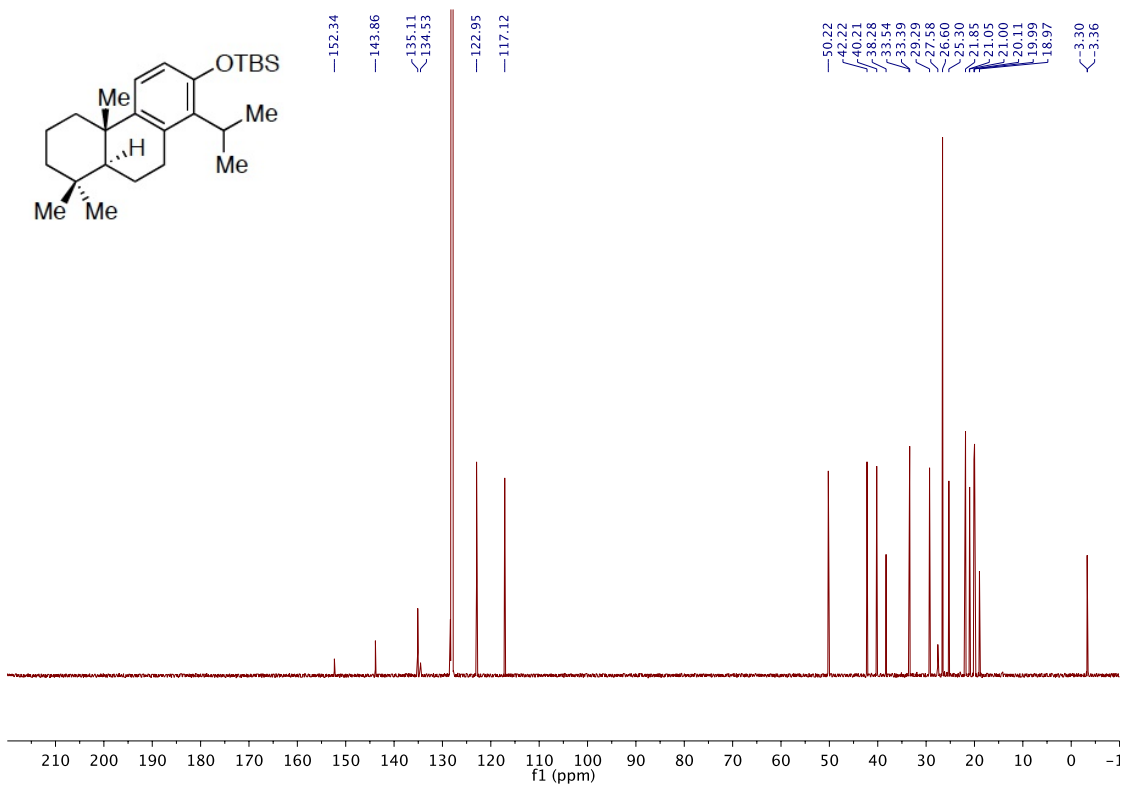

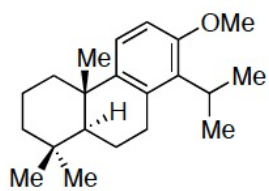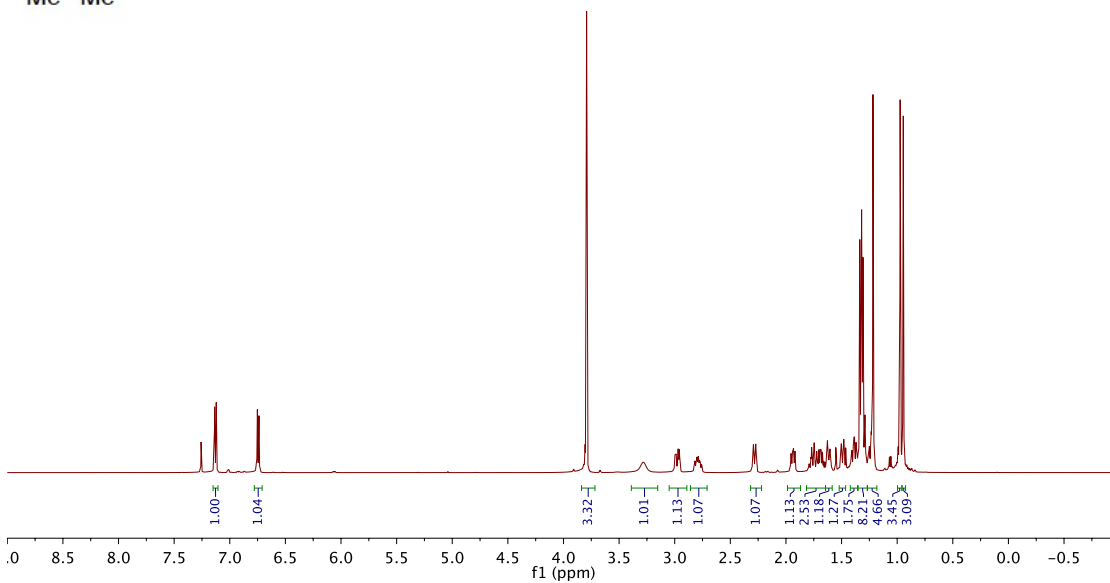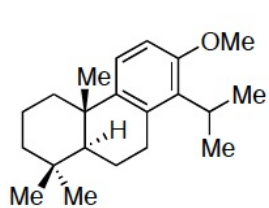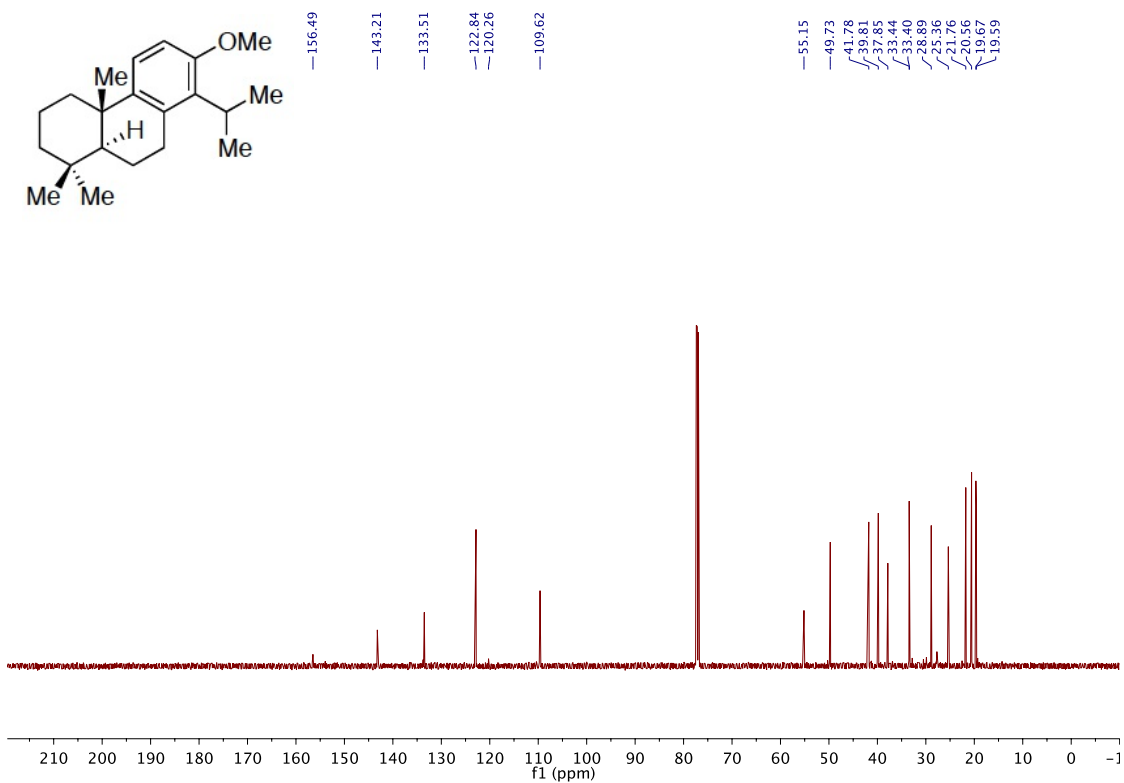

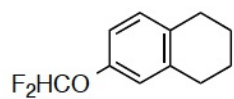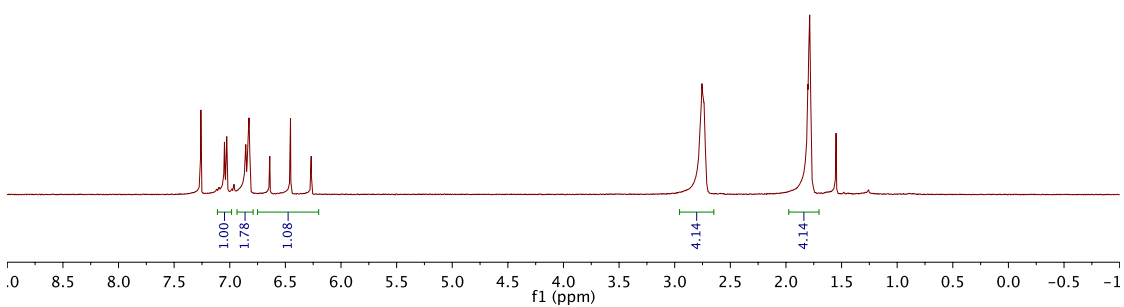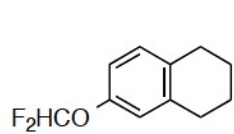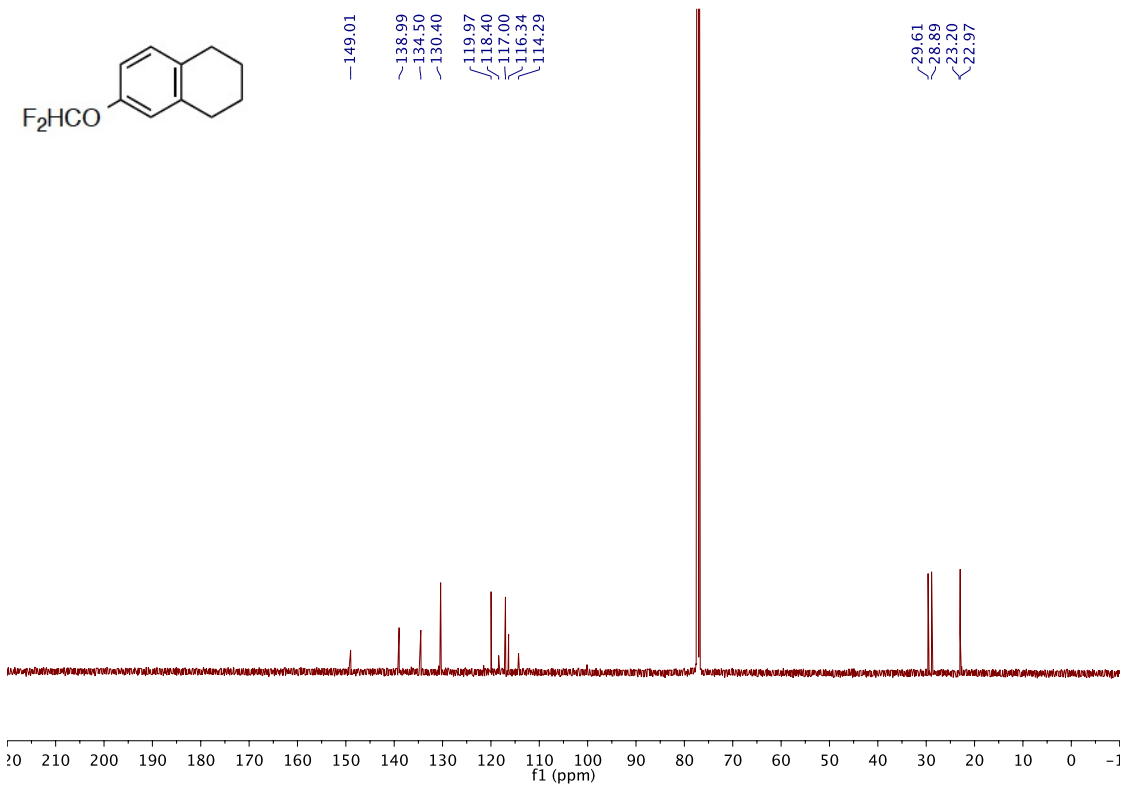

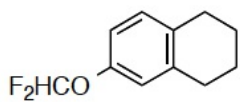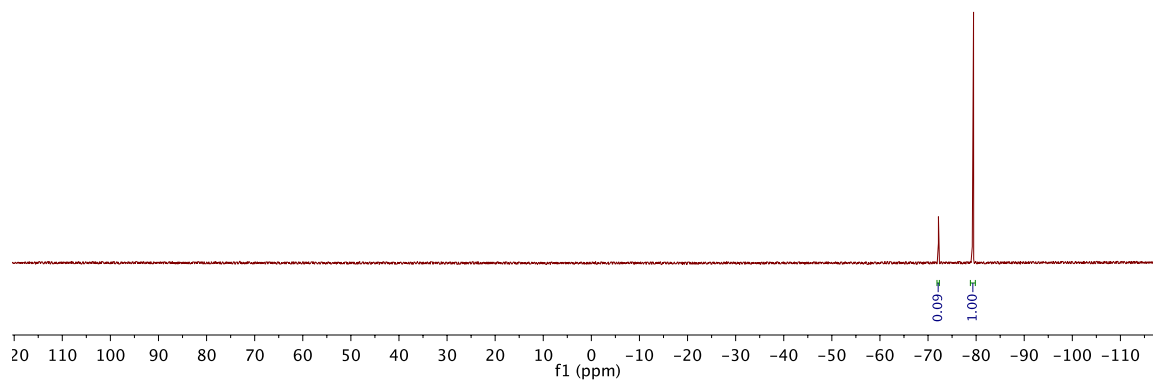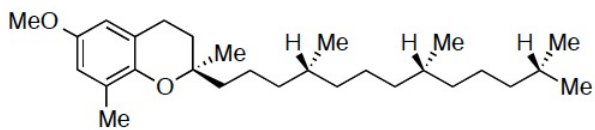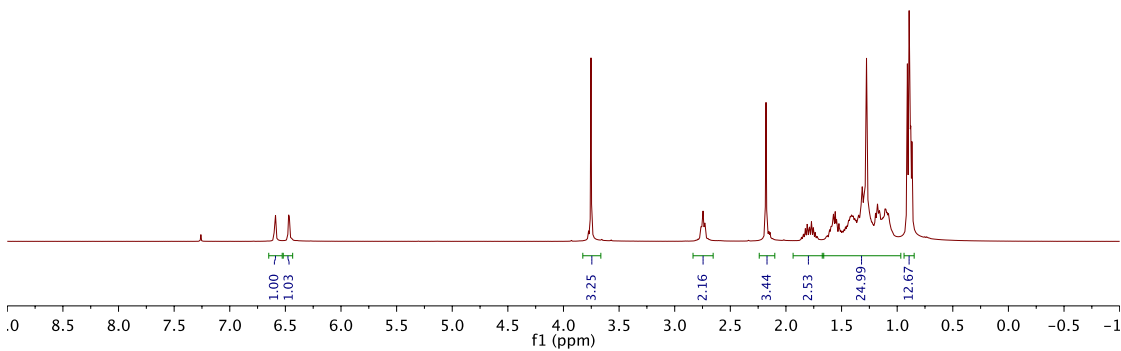

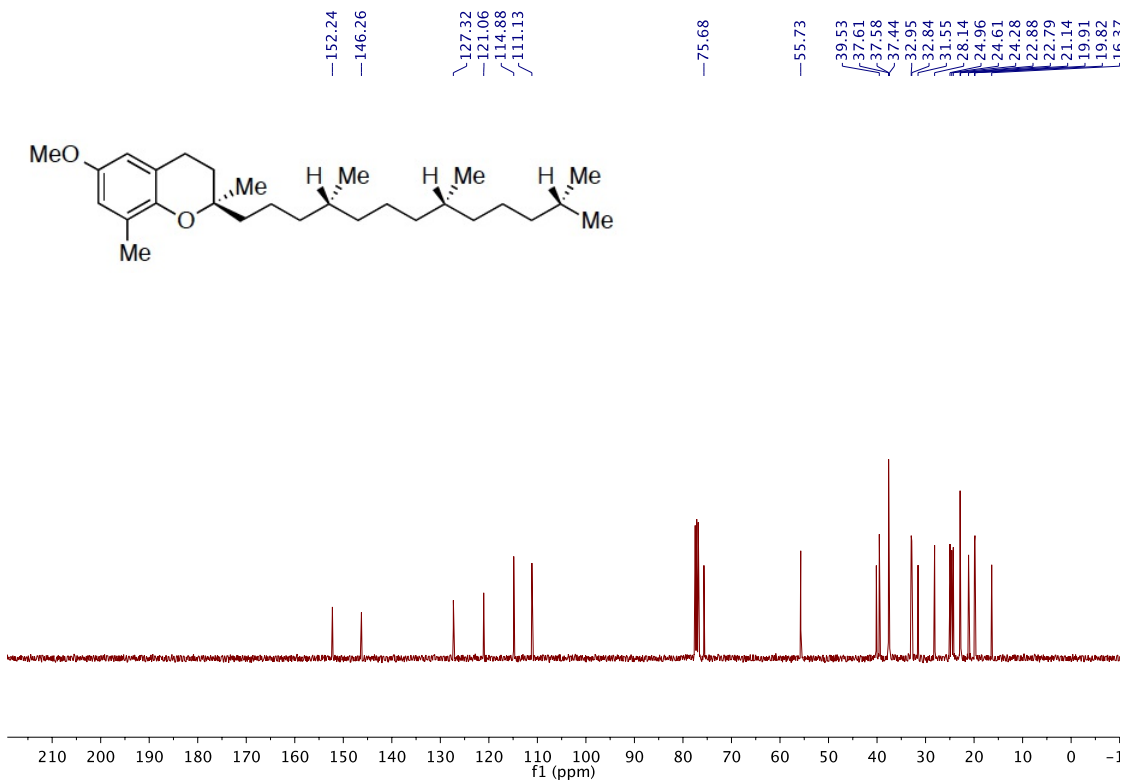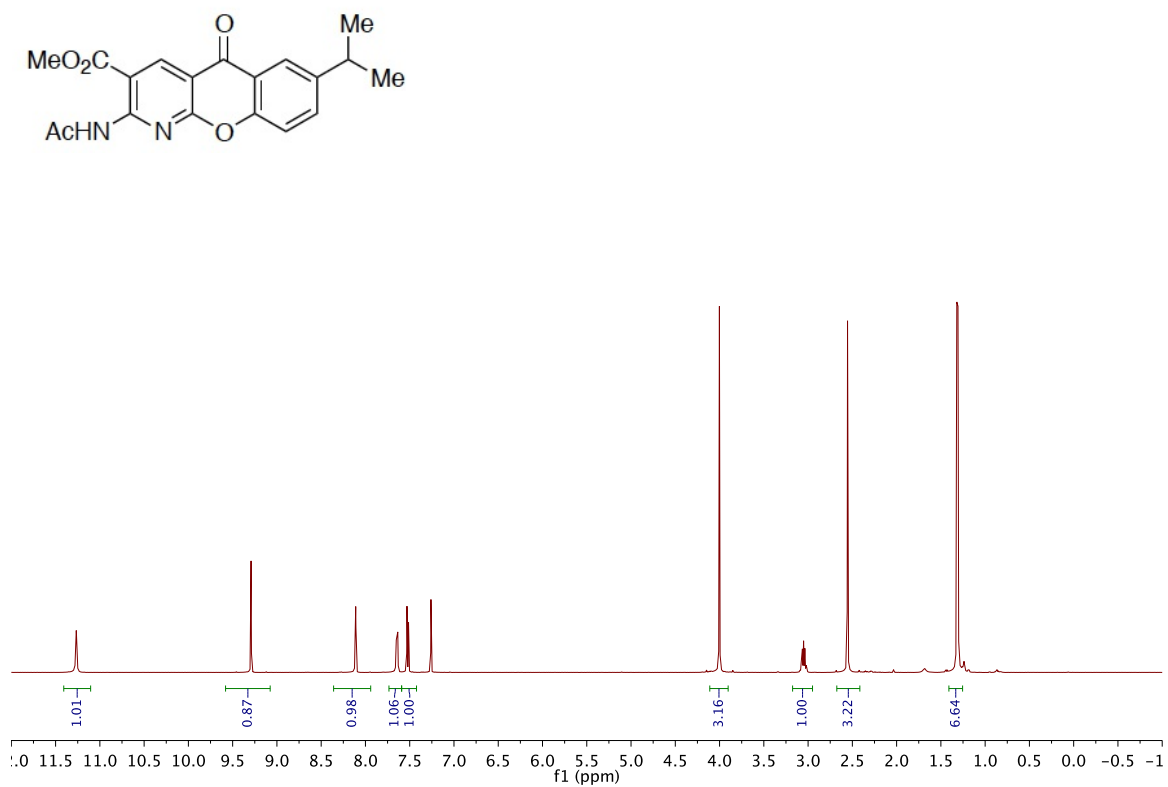

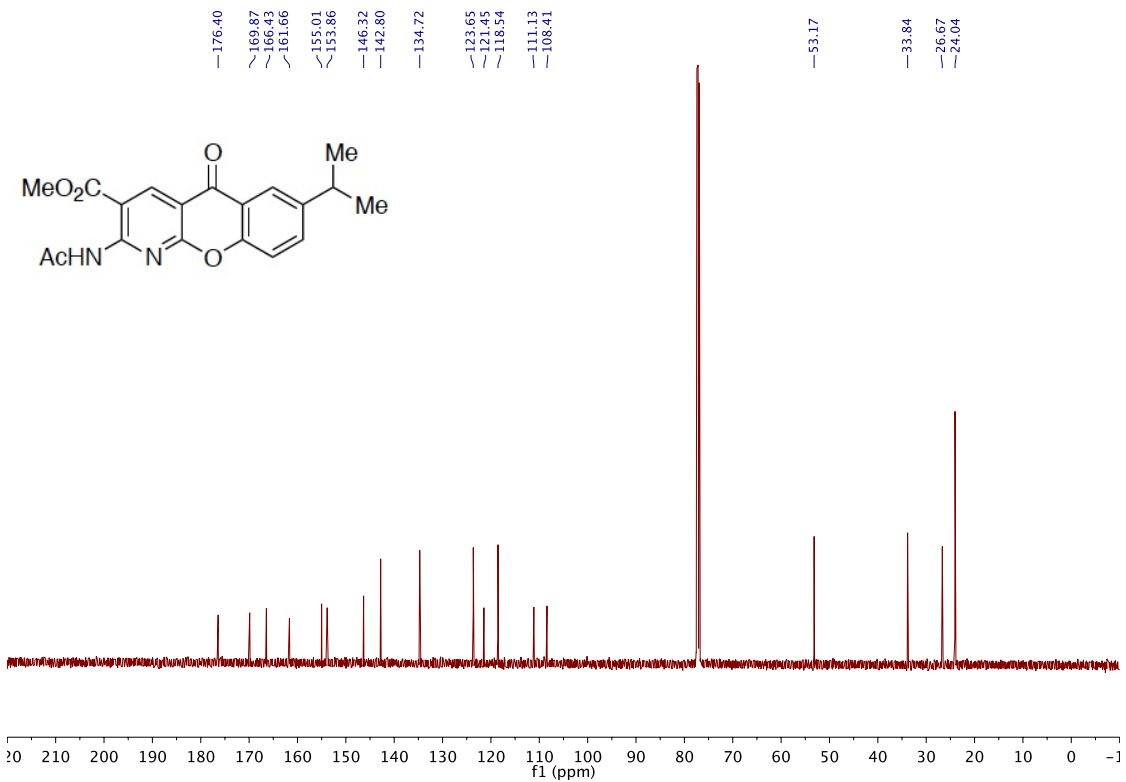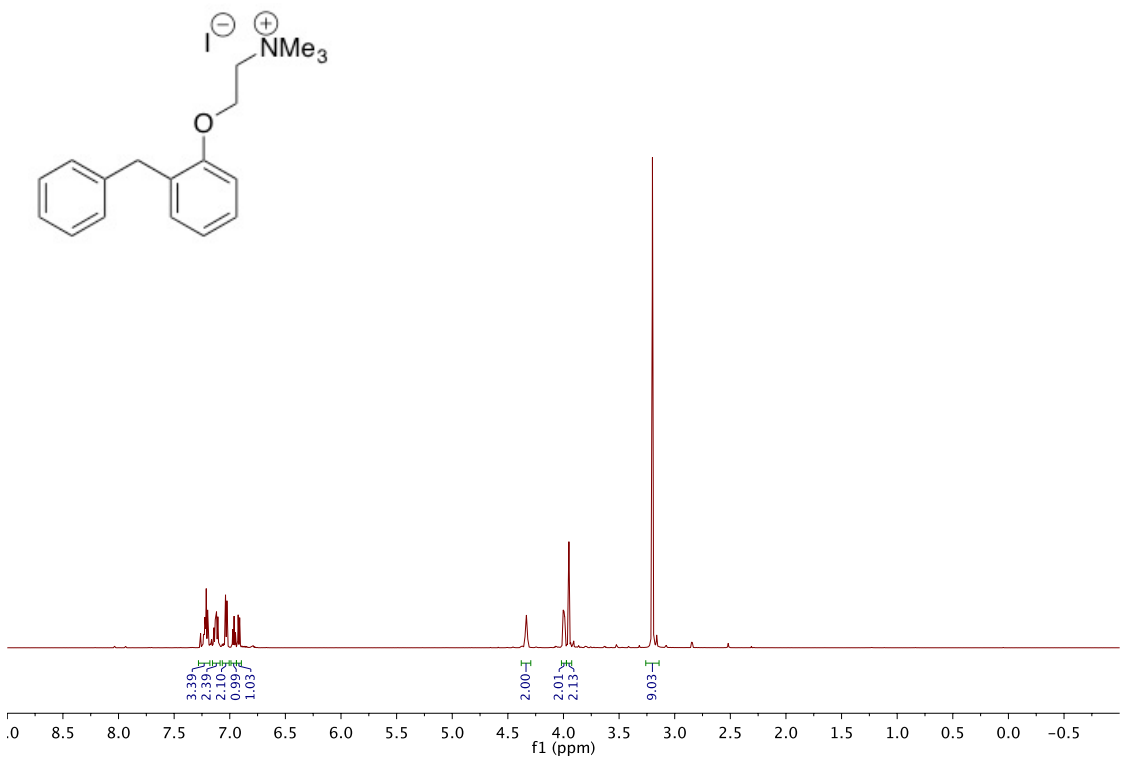

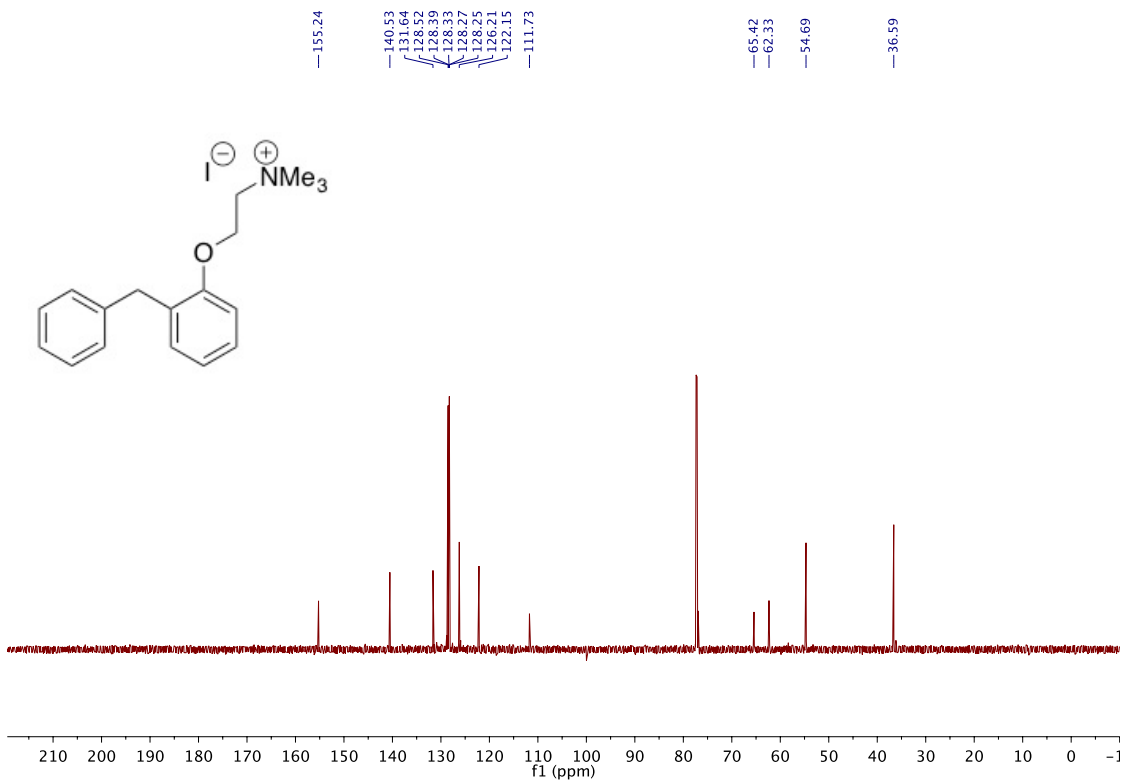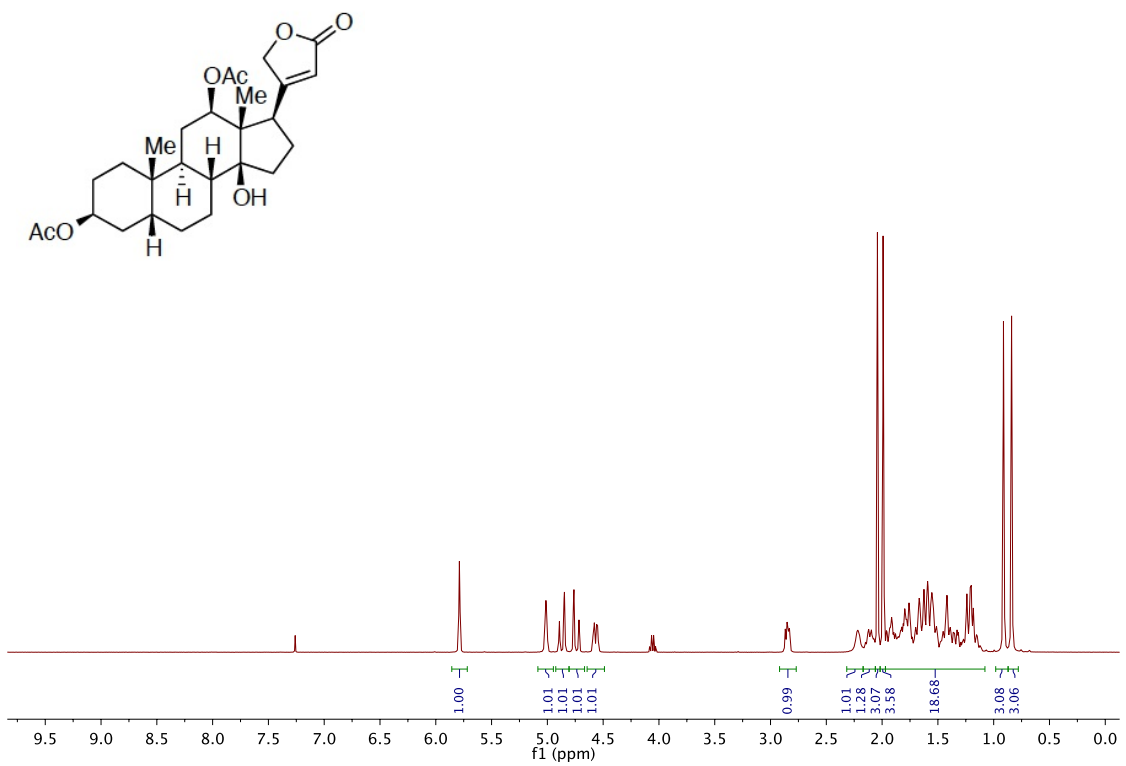

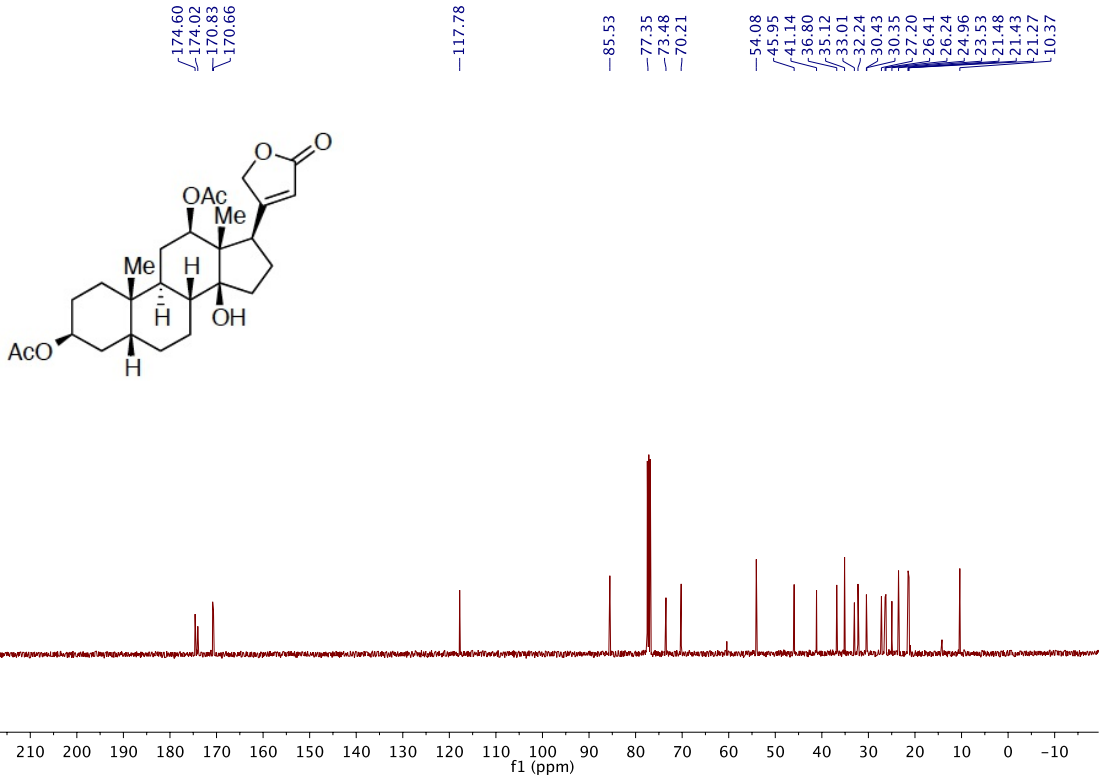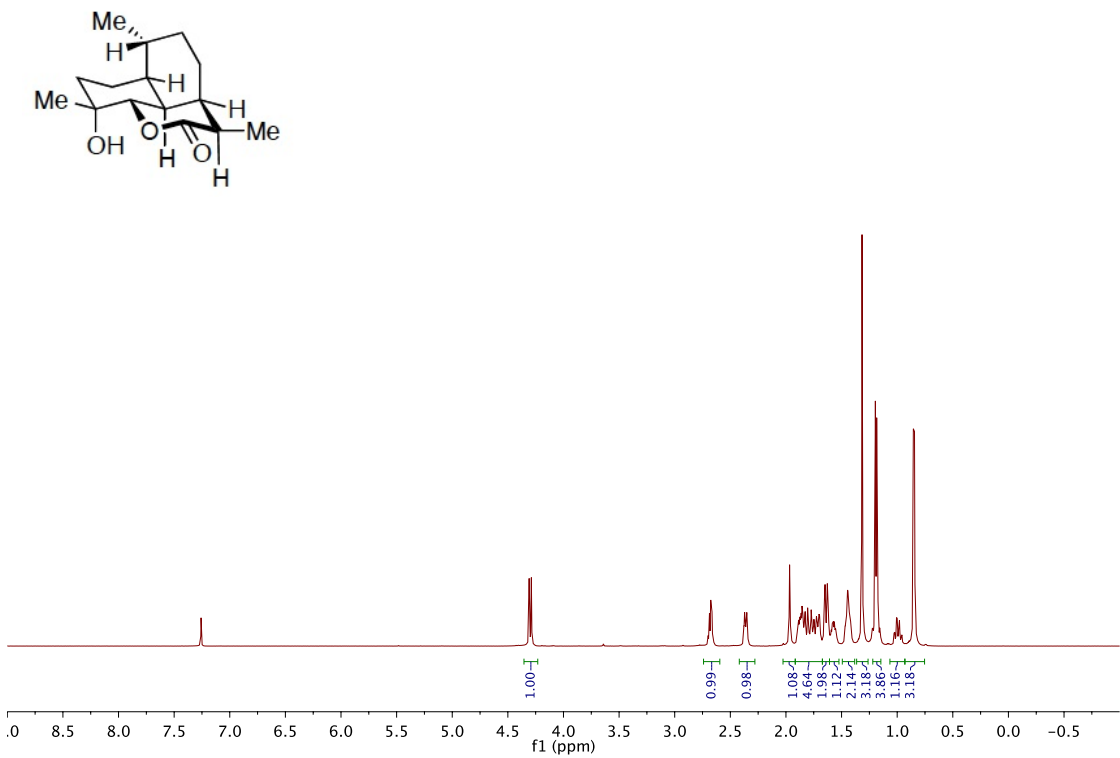



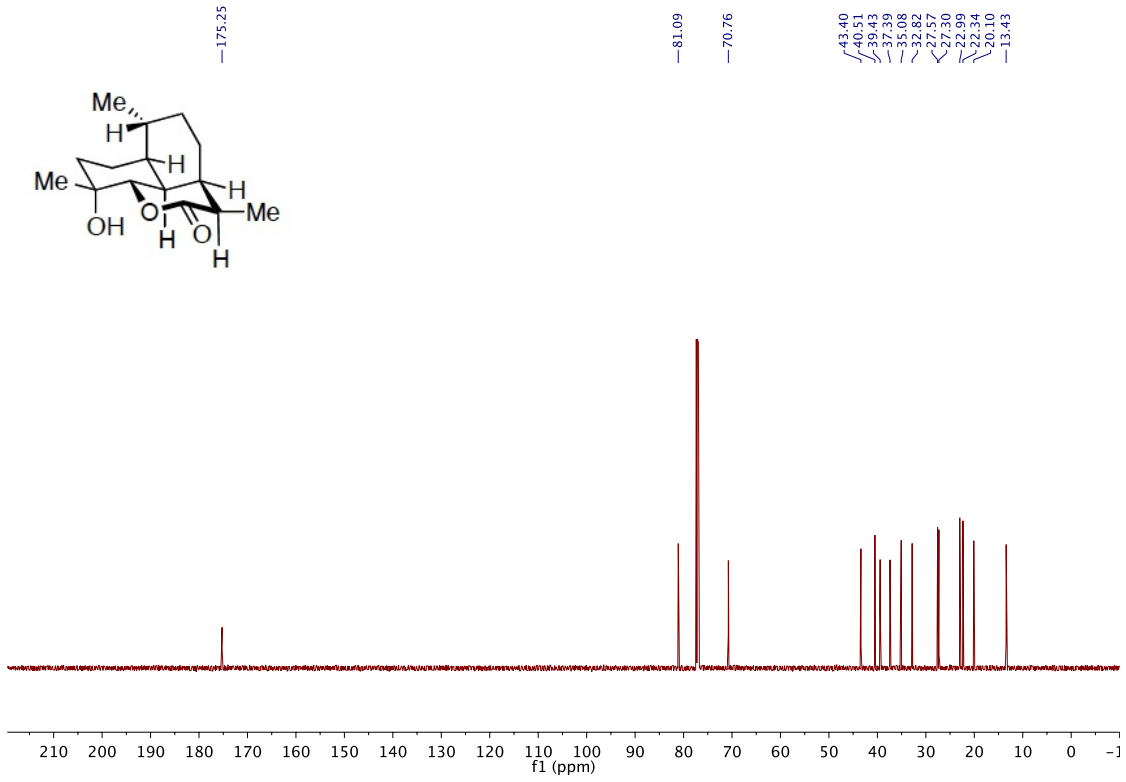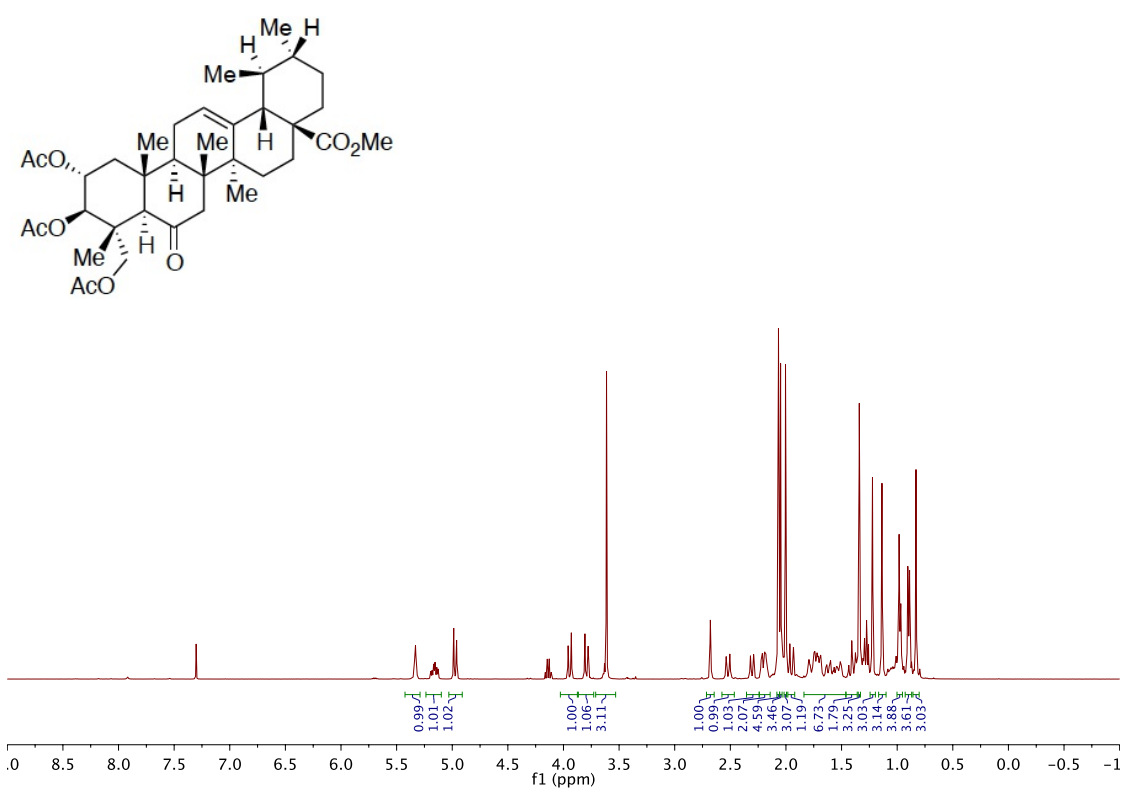

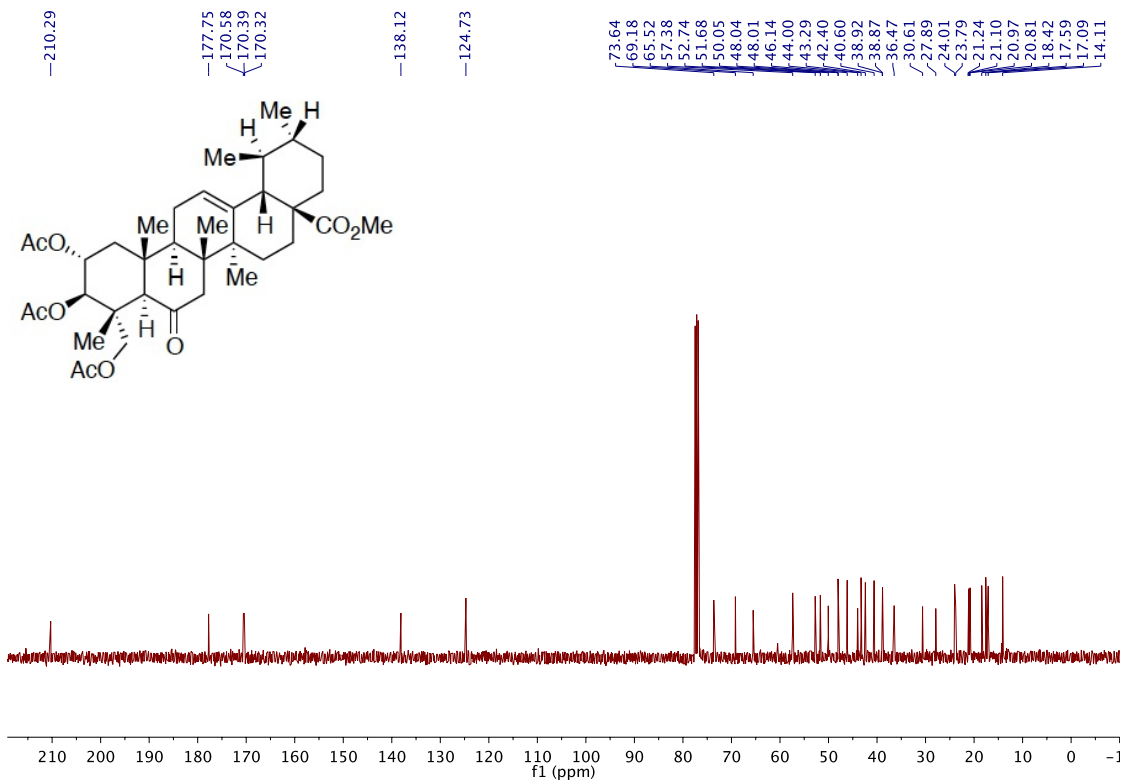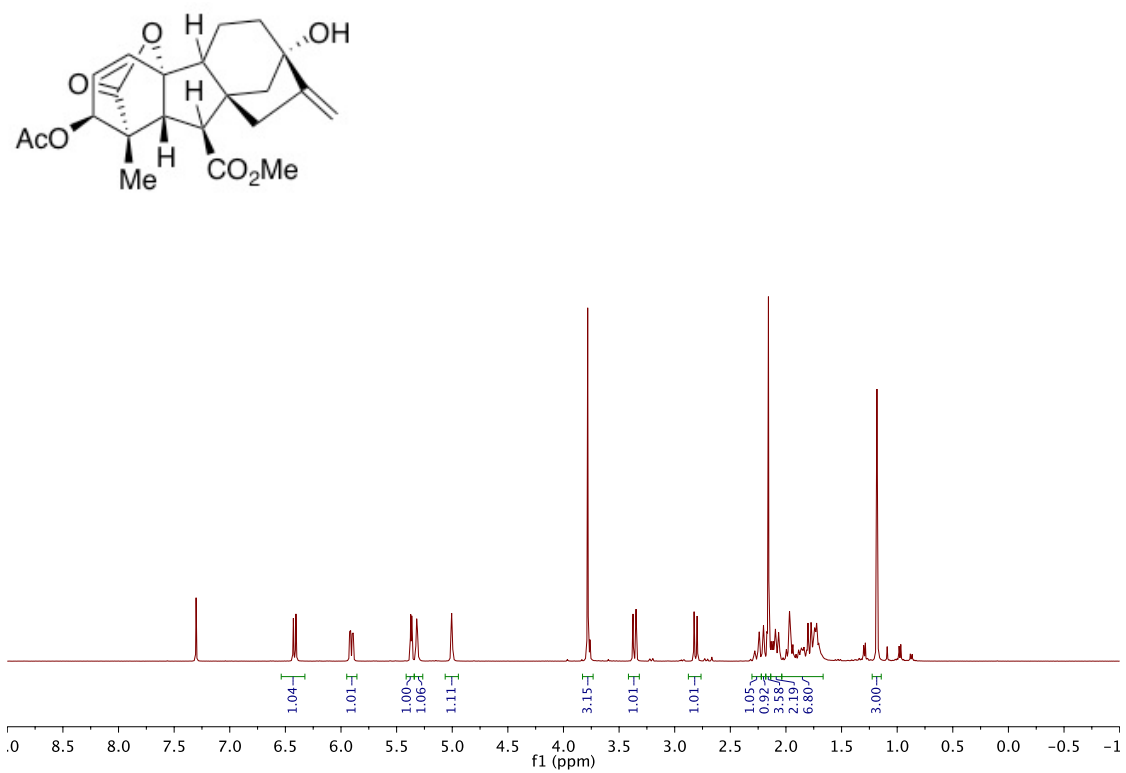

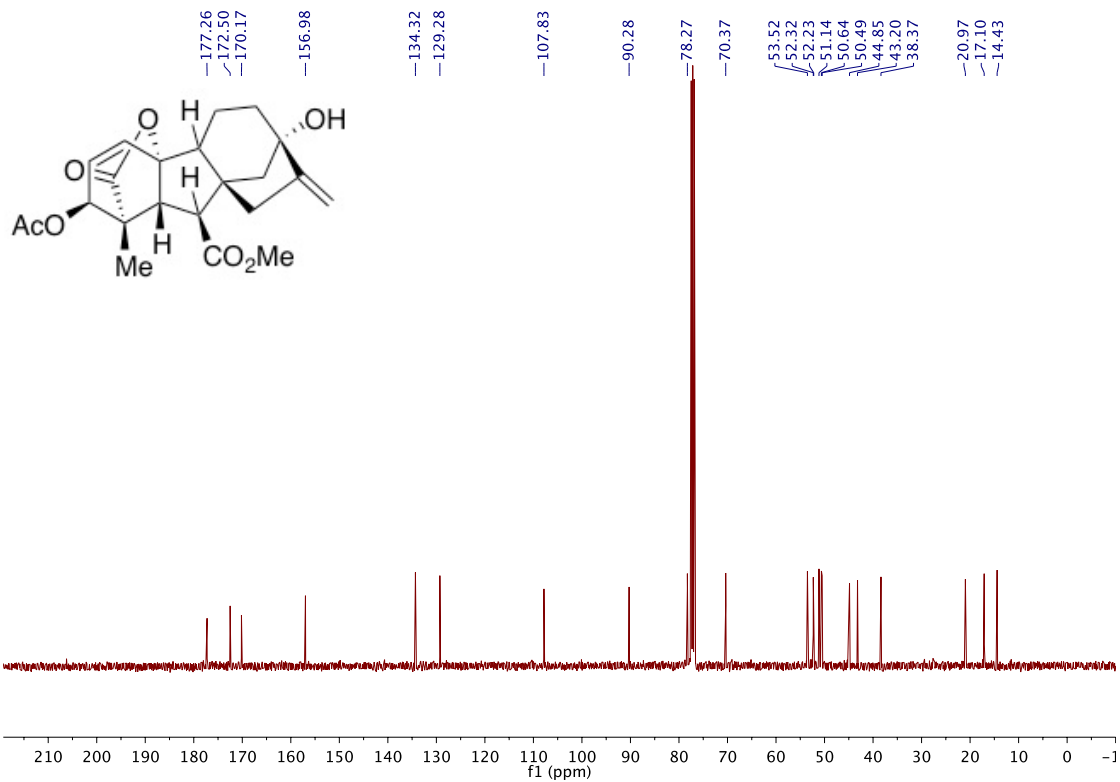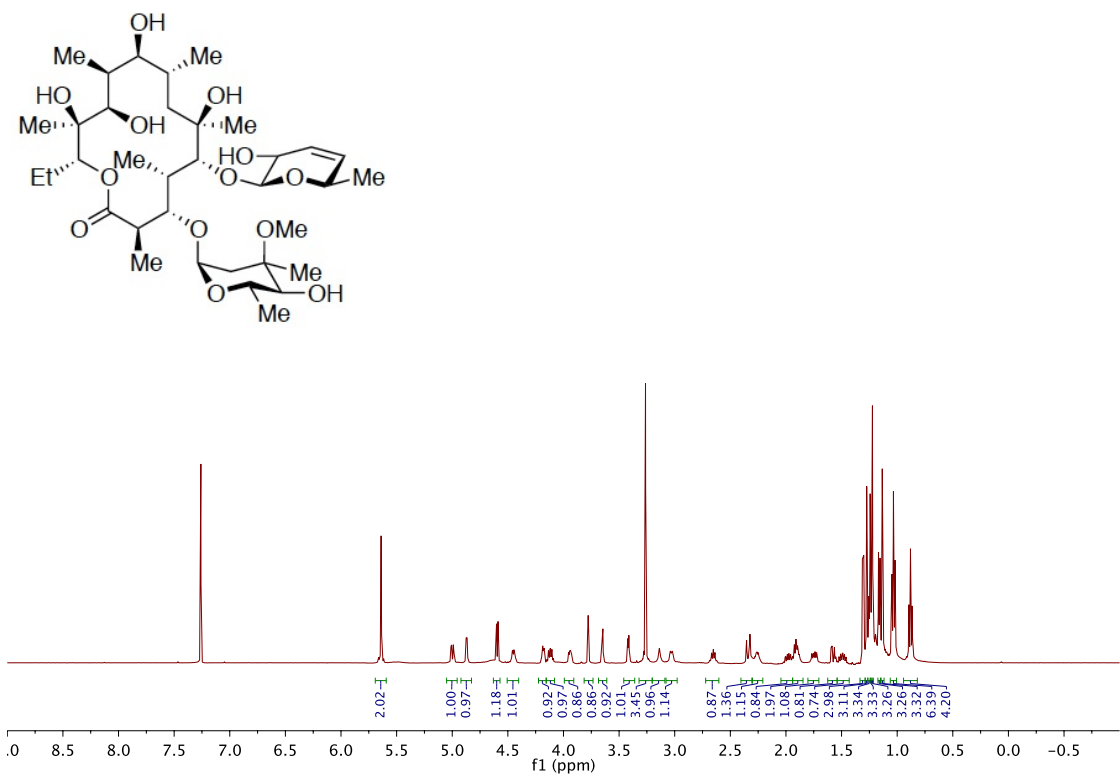

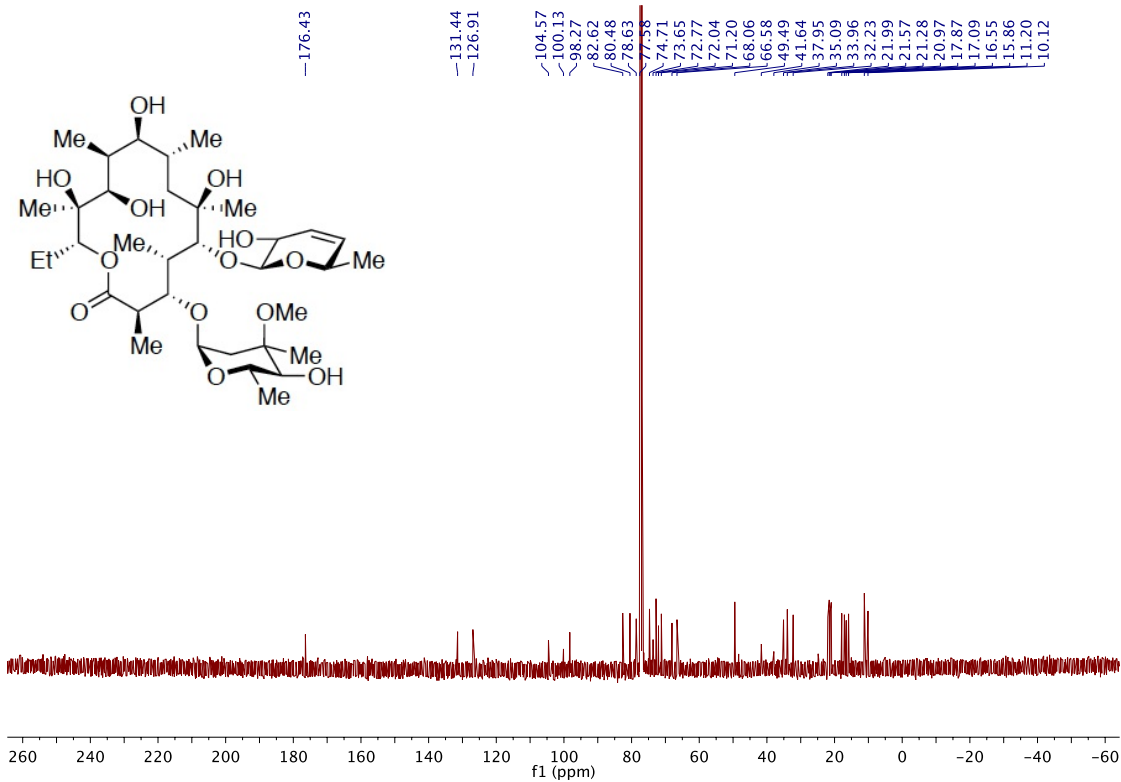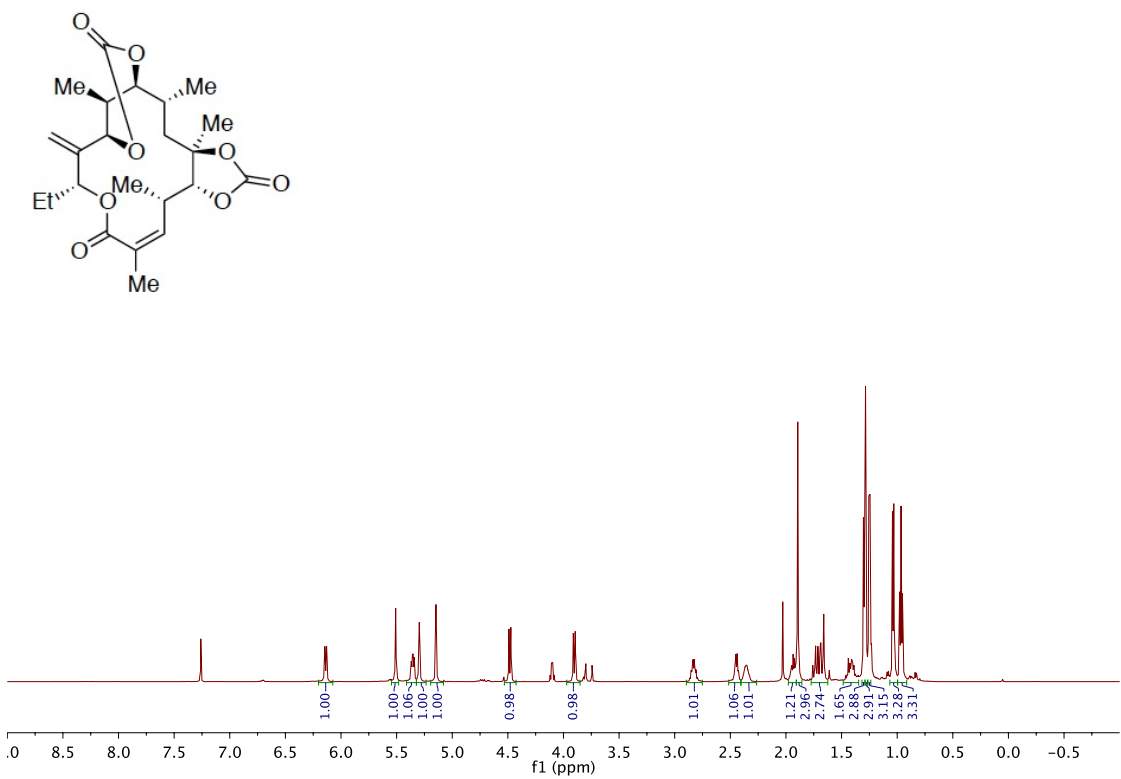

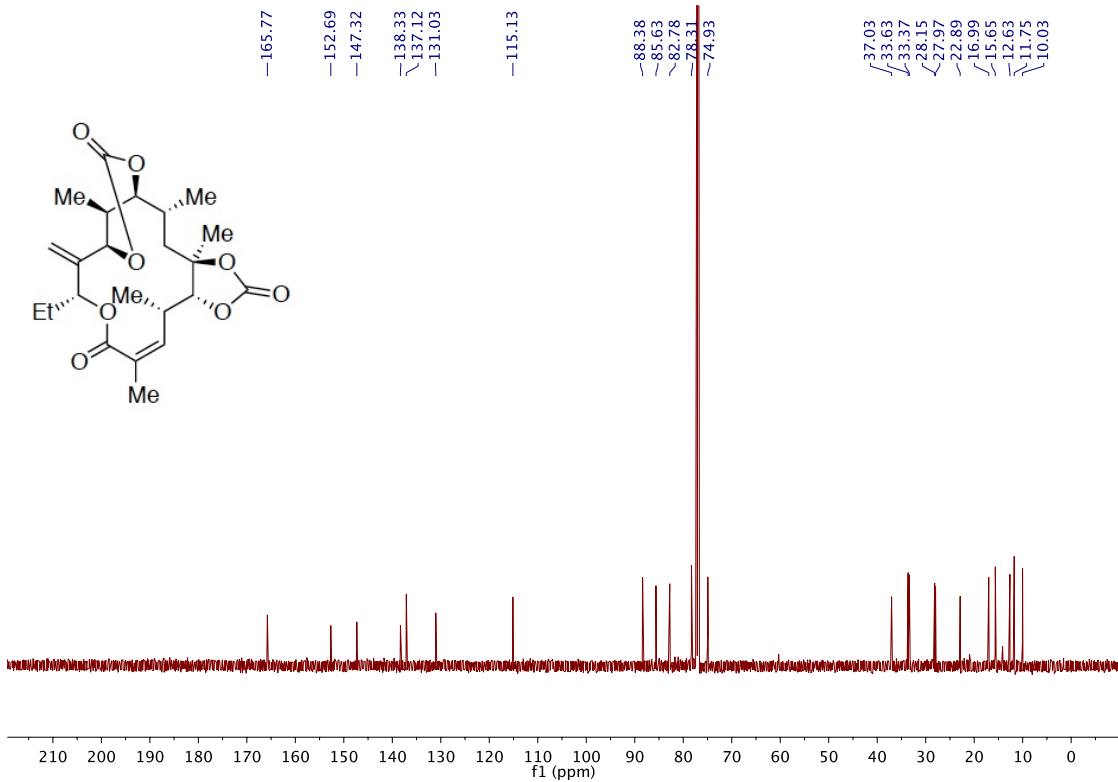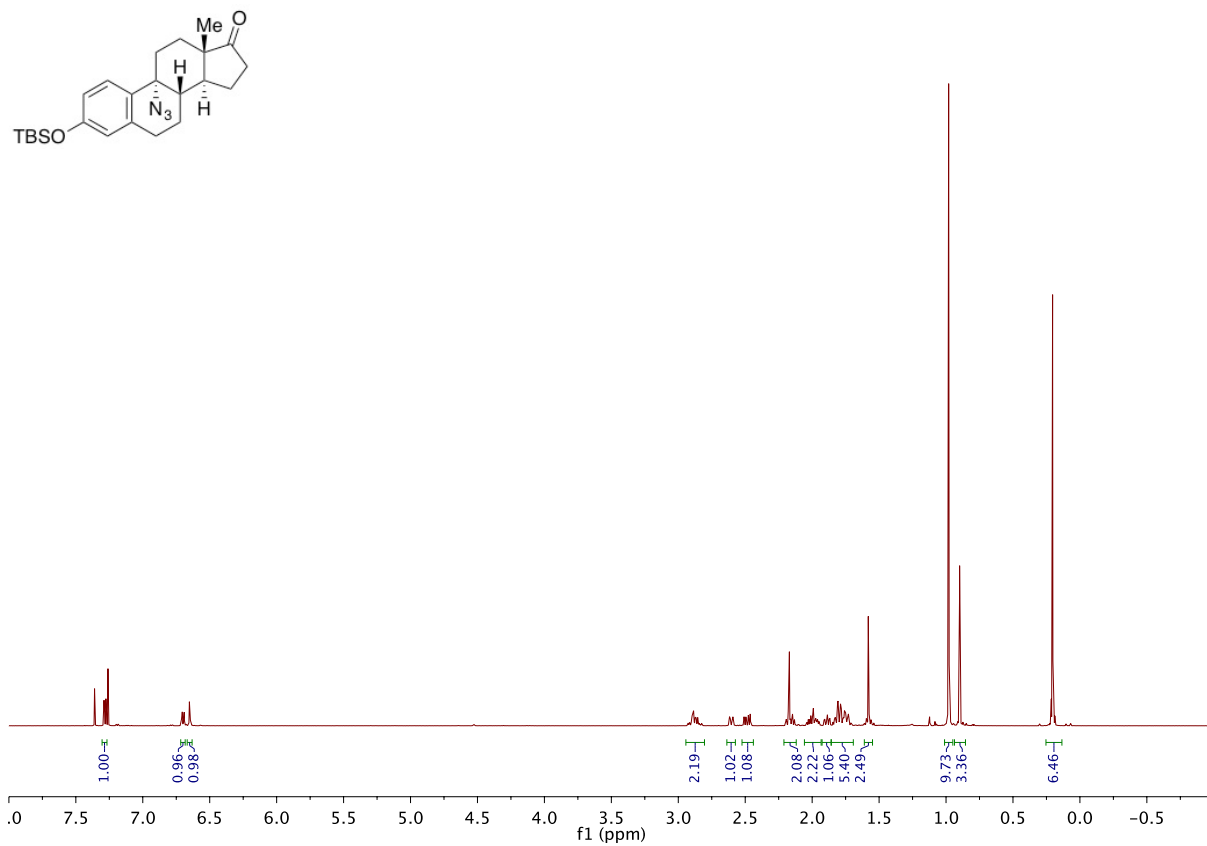

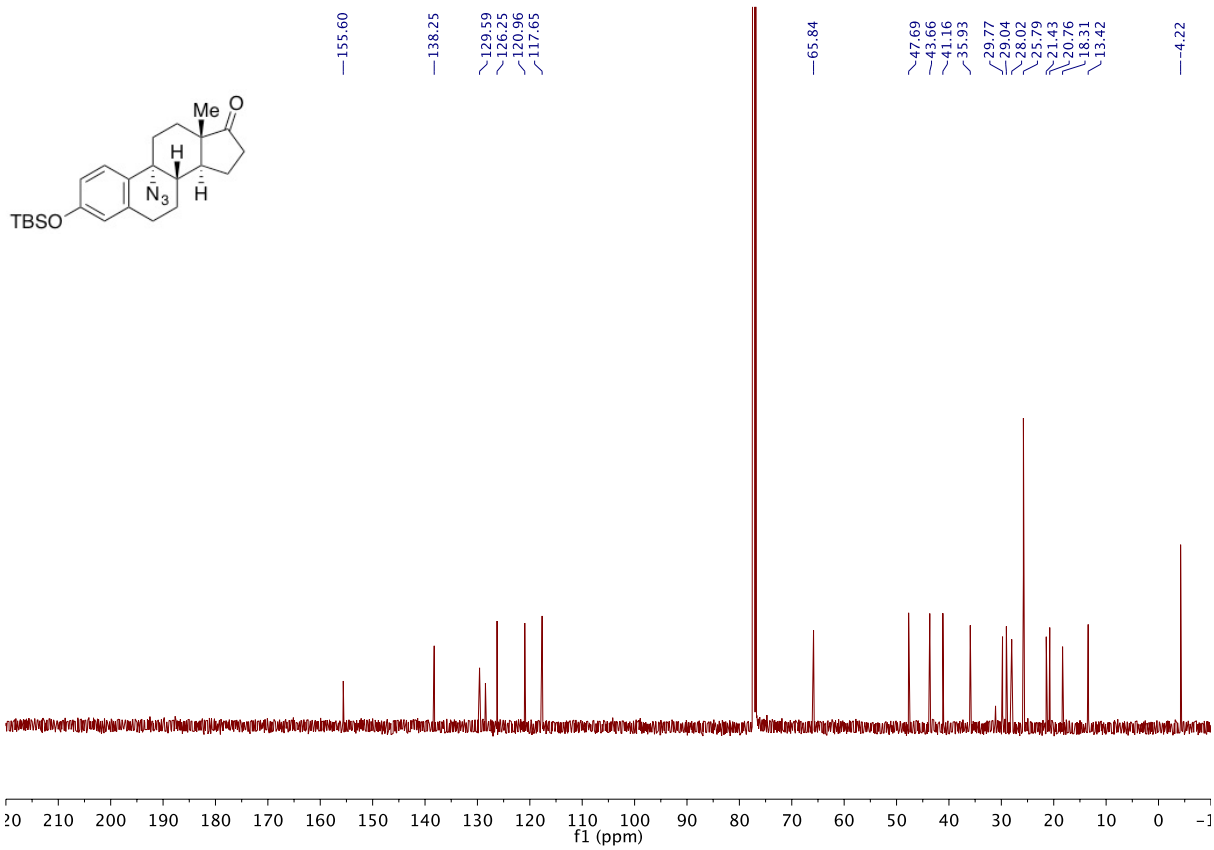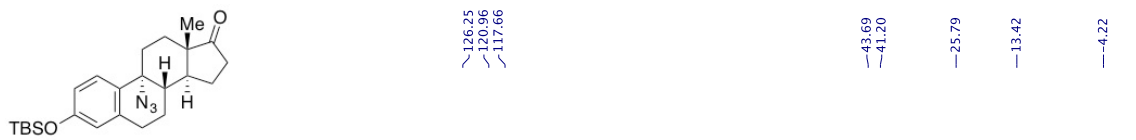

DEPT 135 NMR spectrum of azide **2a**

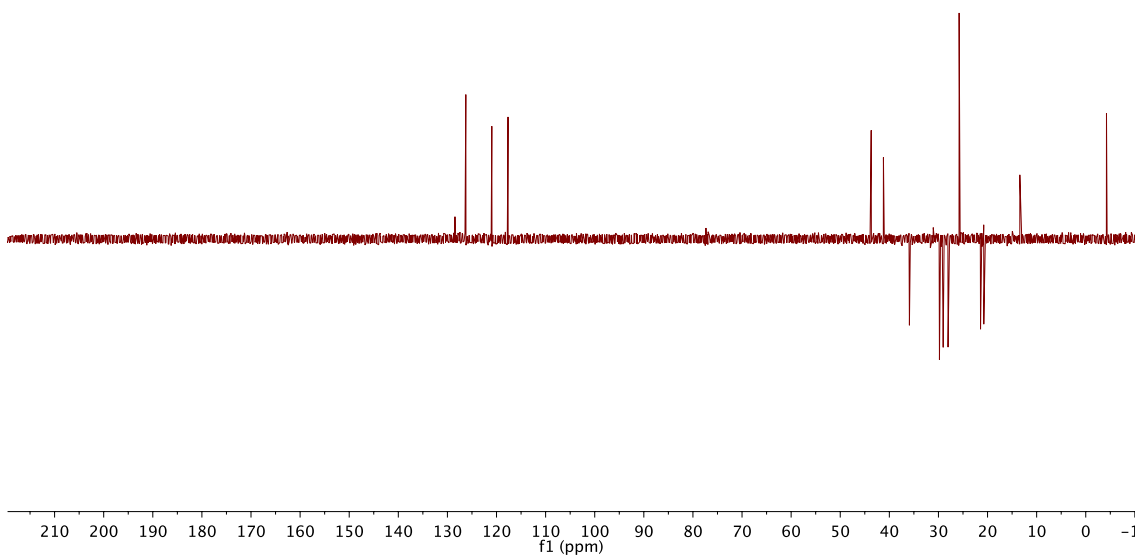

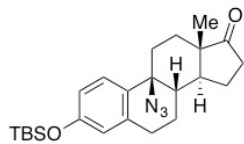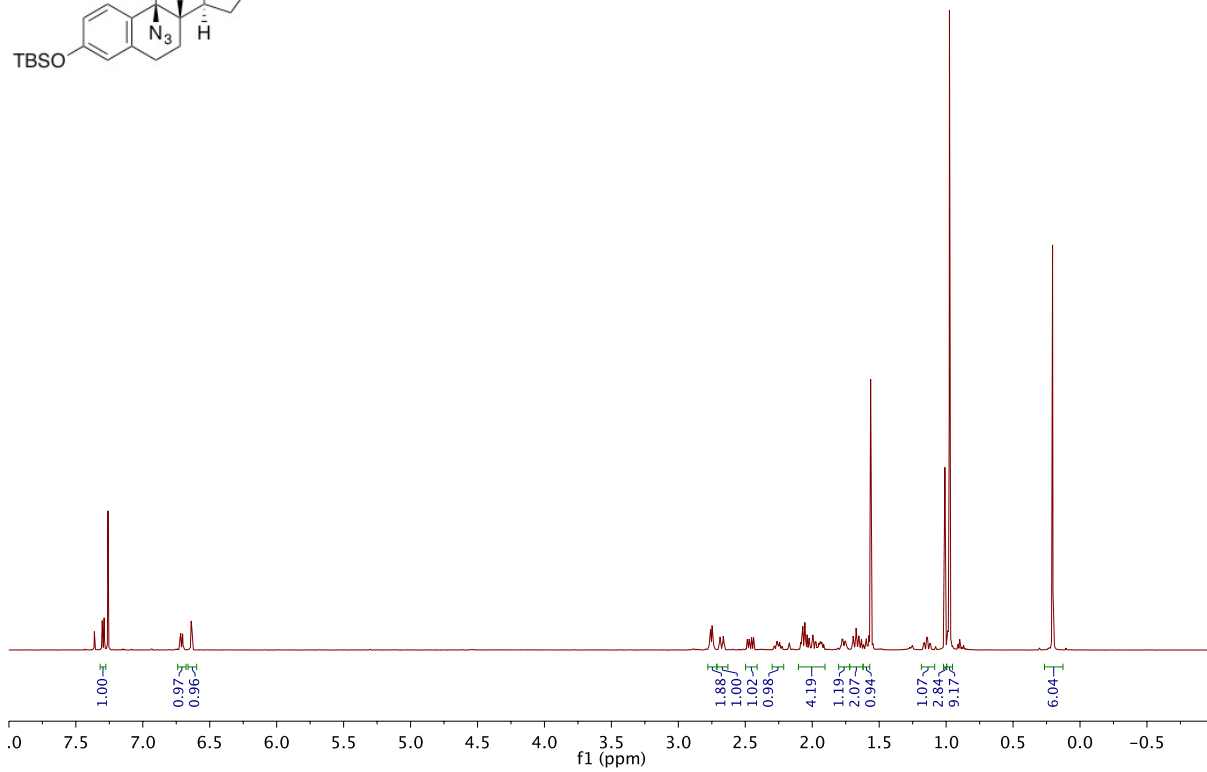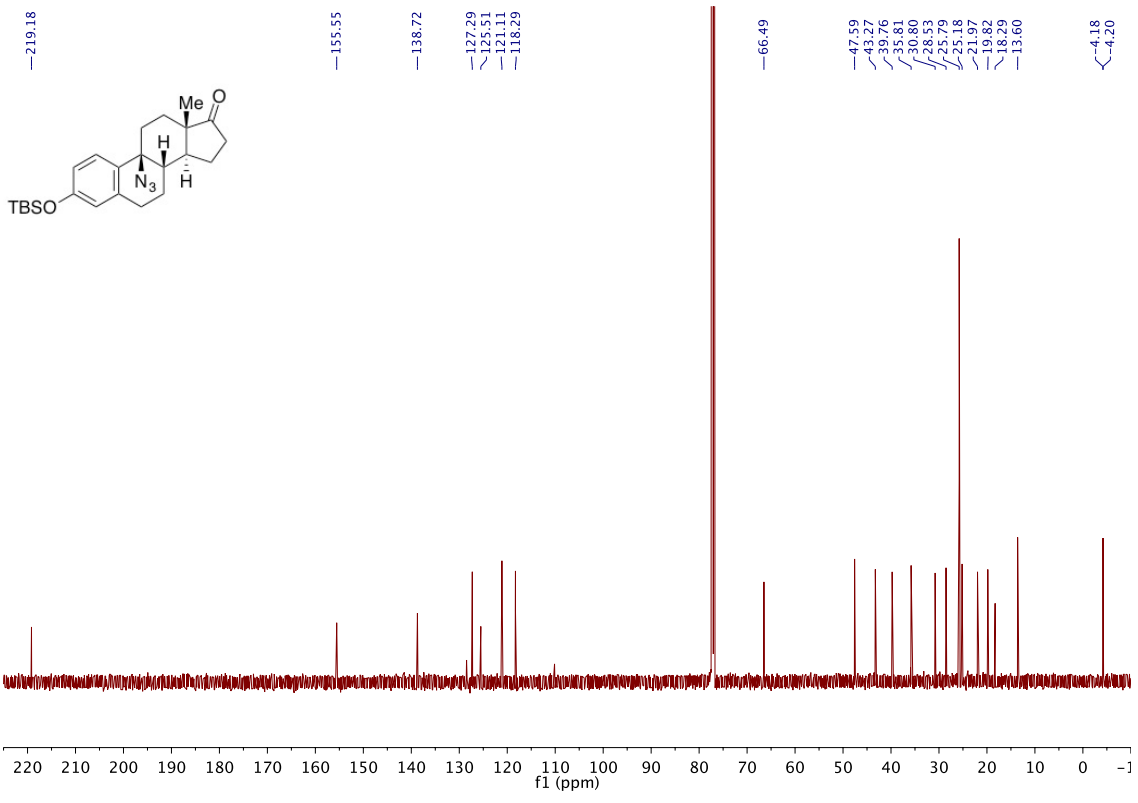

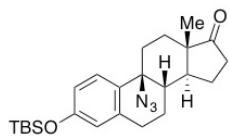

—127.29  
—121.11  
—118.28

—43.26  
—39.75

—25.78

—13.60

—4.18  
—4.20

DEPT 135 NMR spectrum of azide **2a**

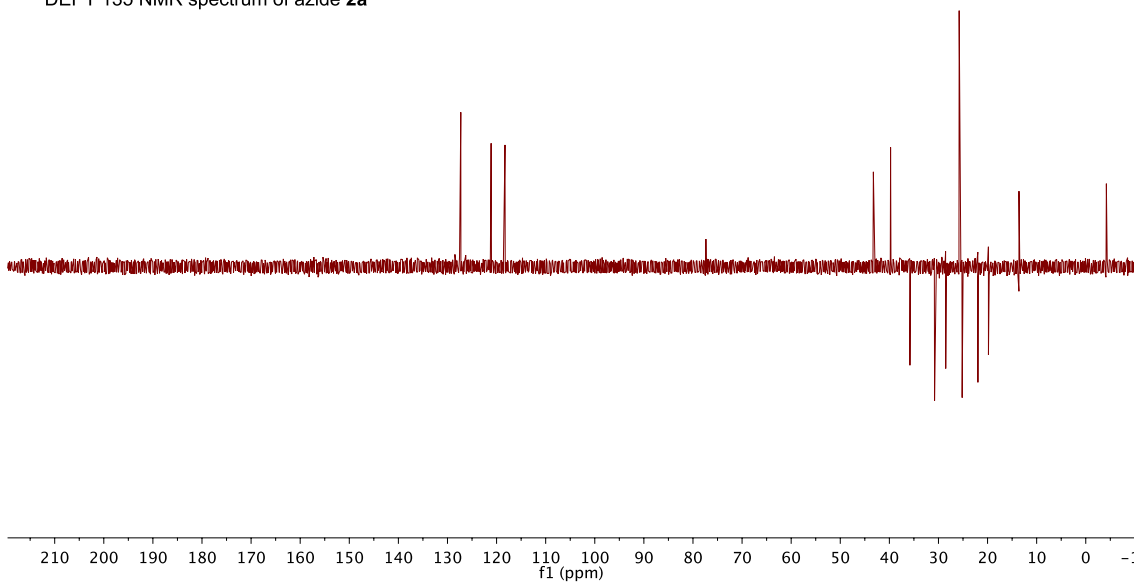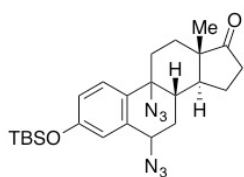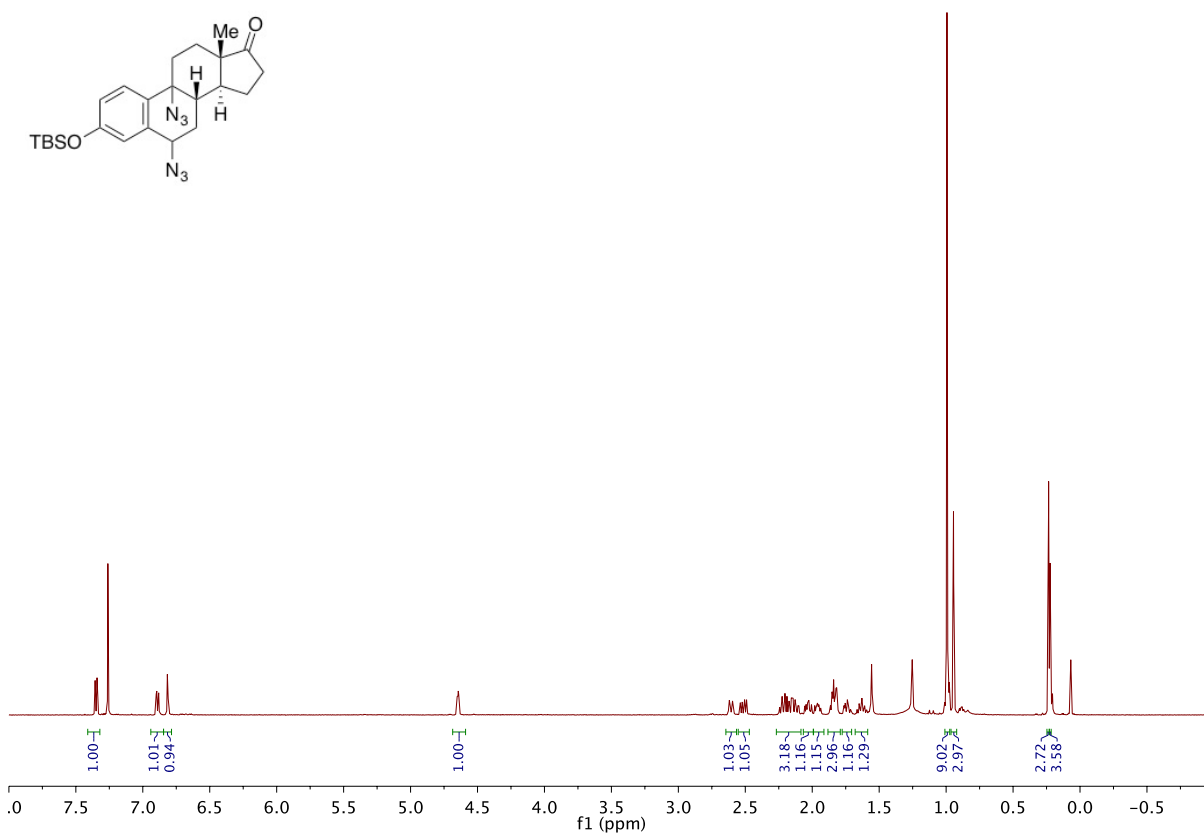



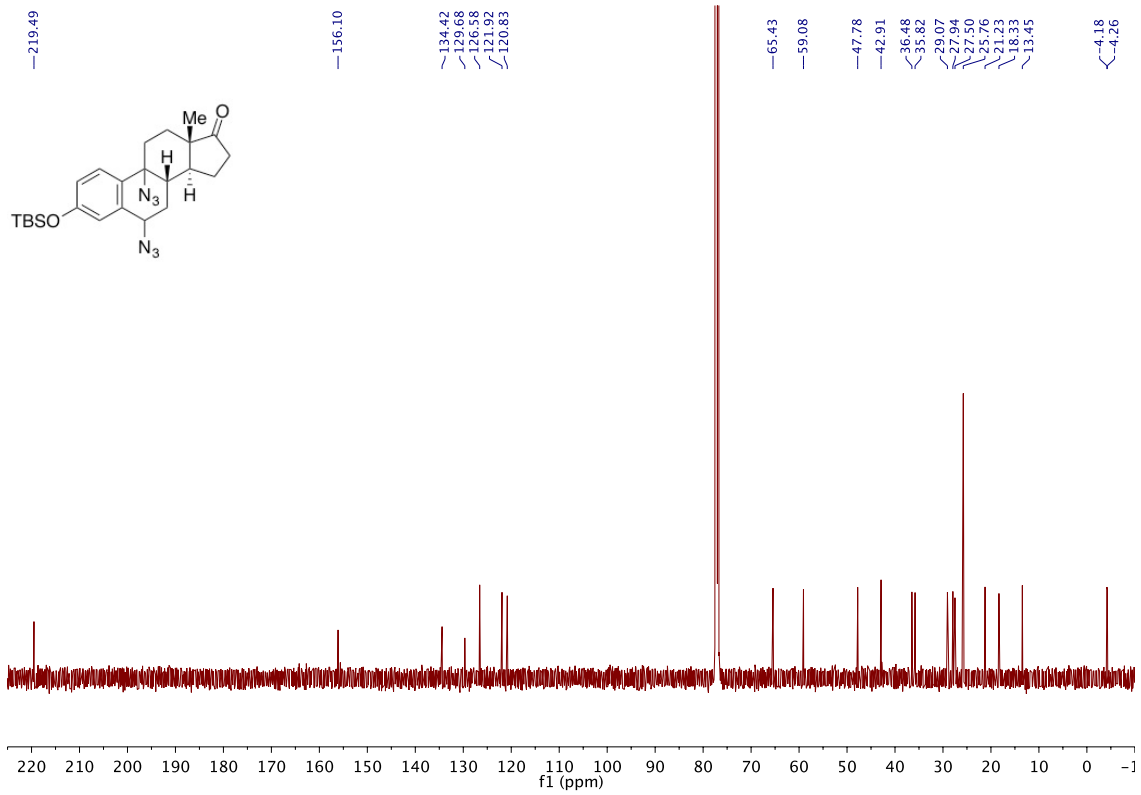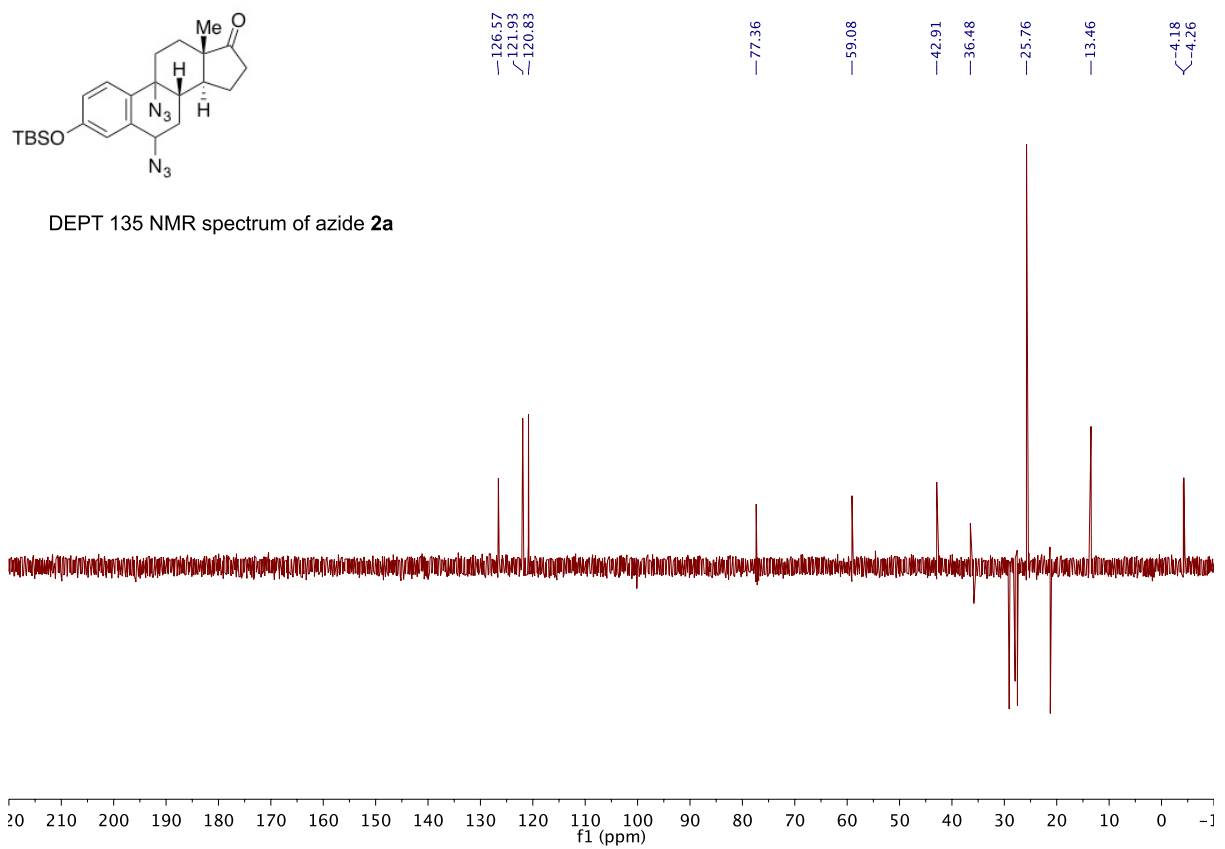

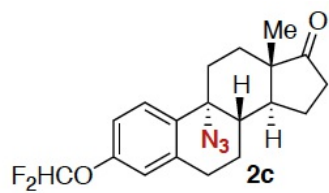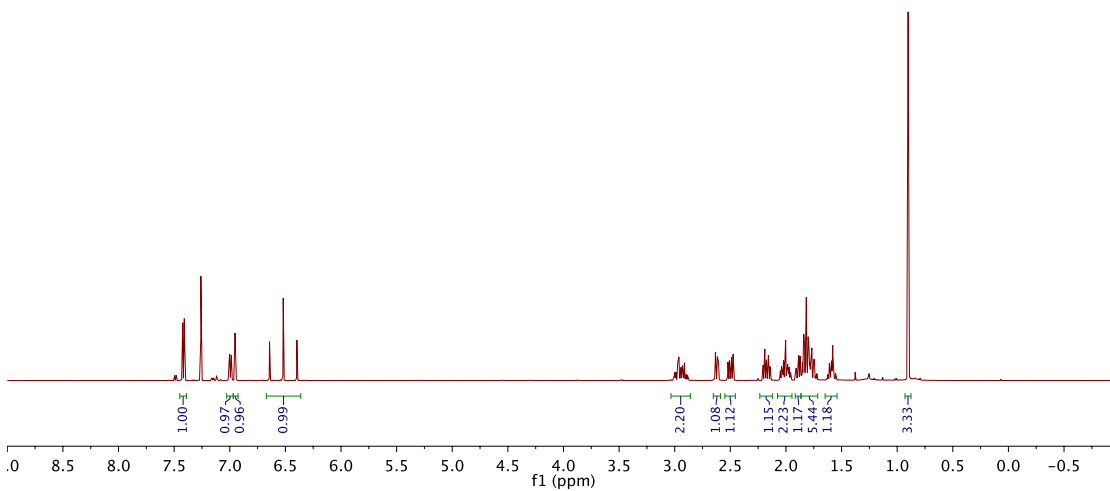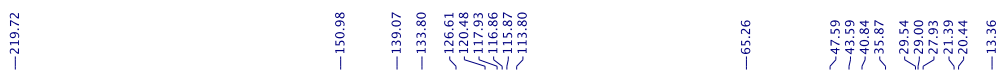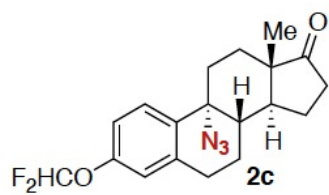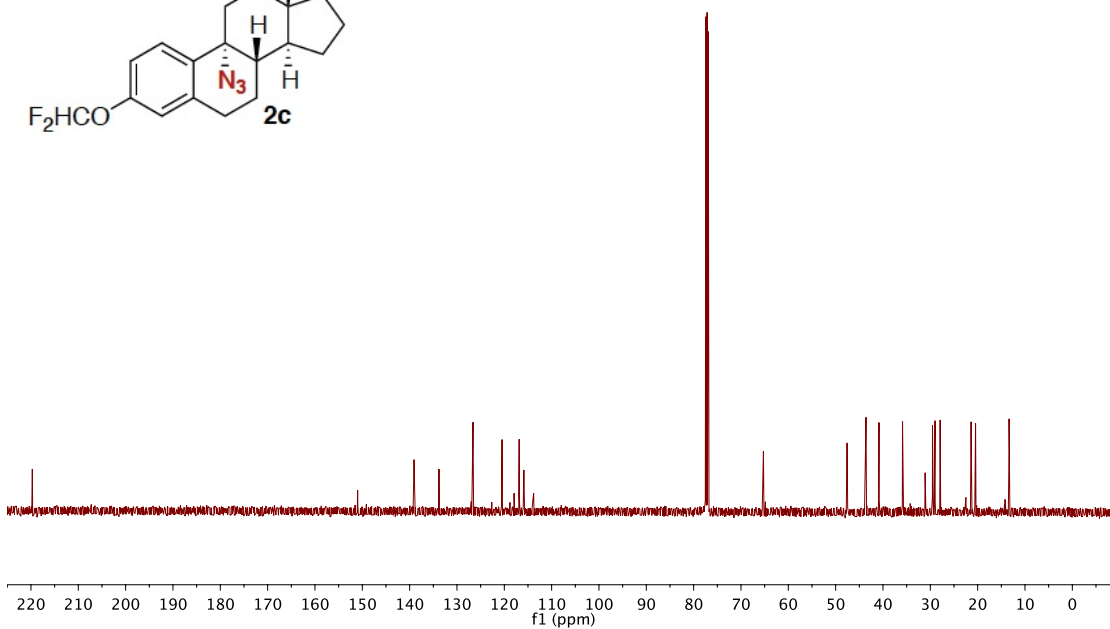

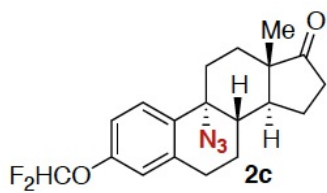

DEPT 90 NMR spectrum of azide **2c**

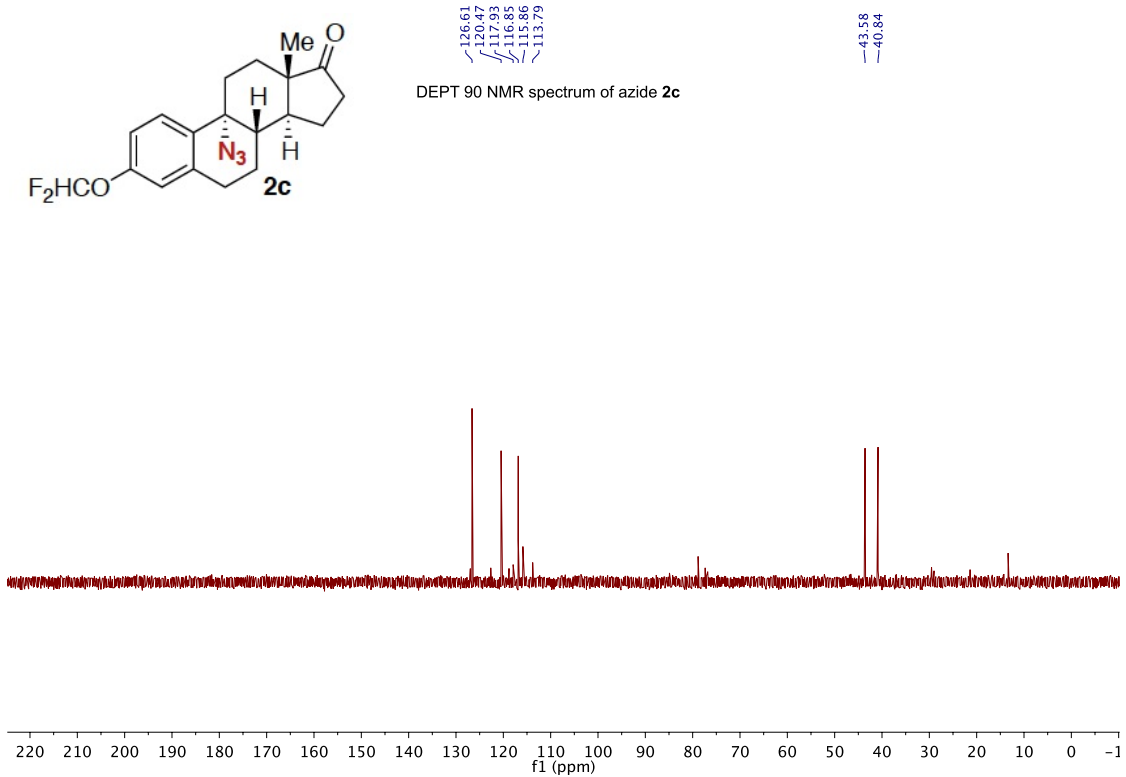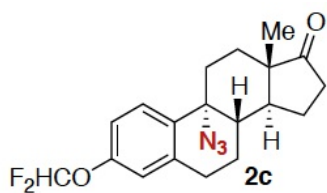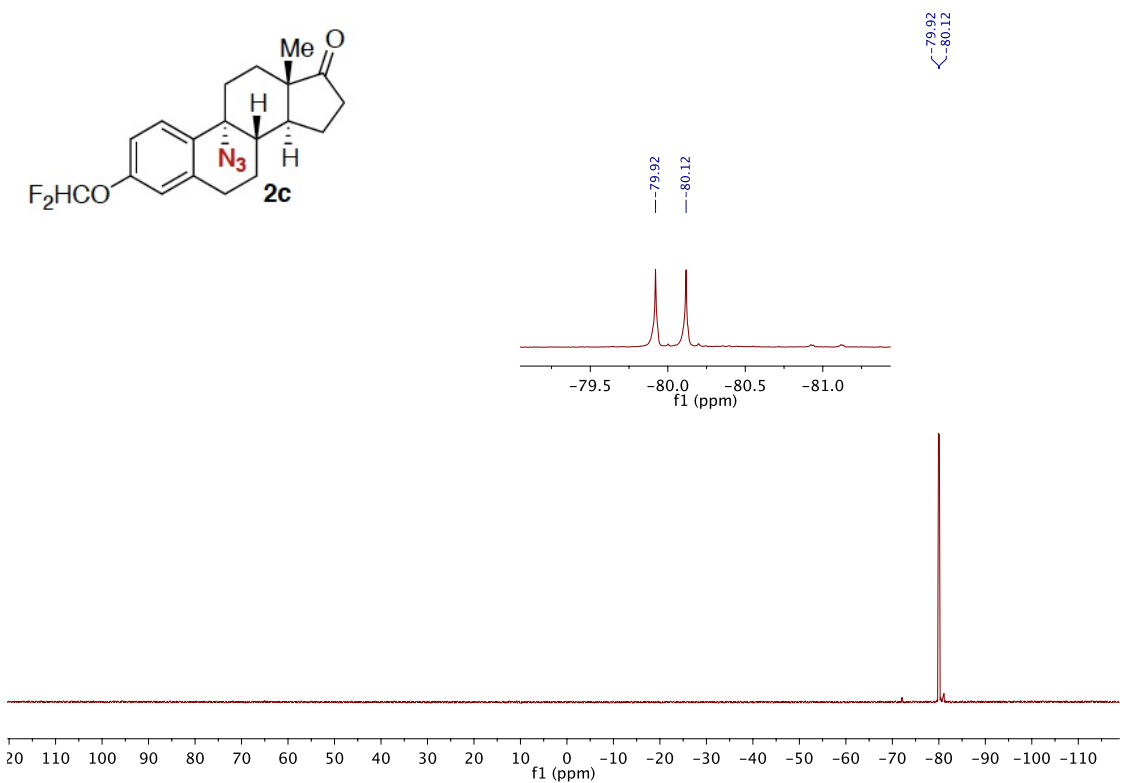

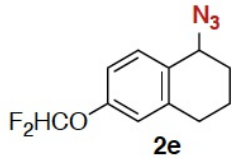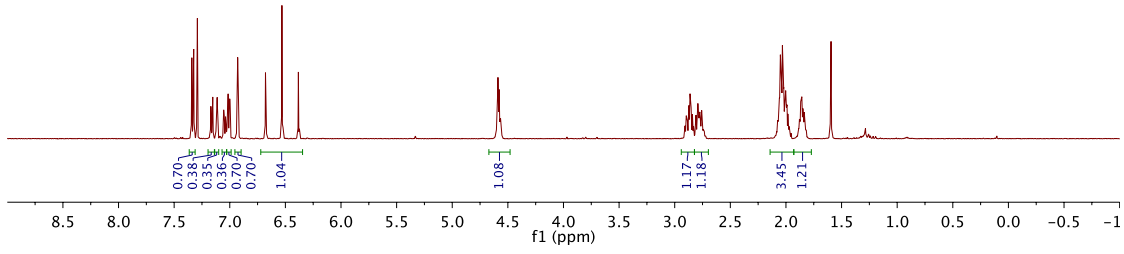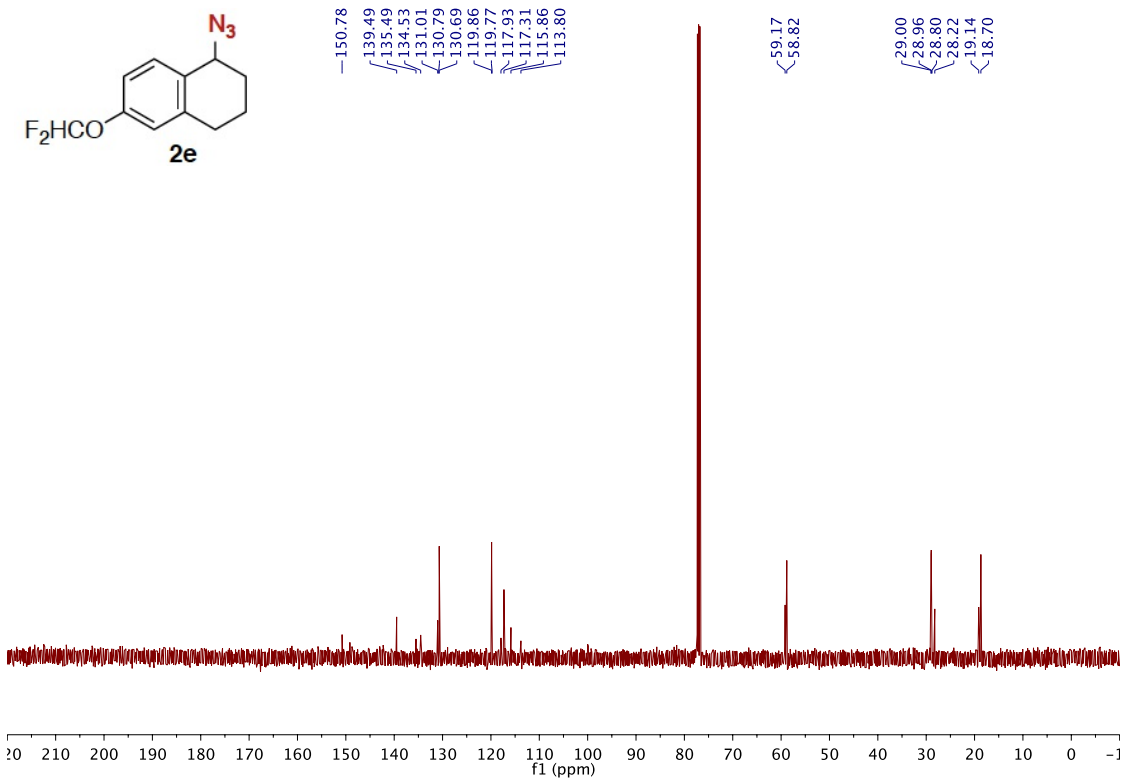

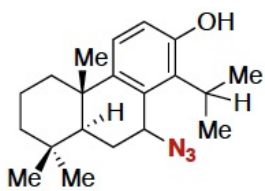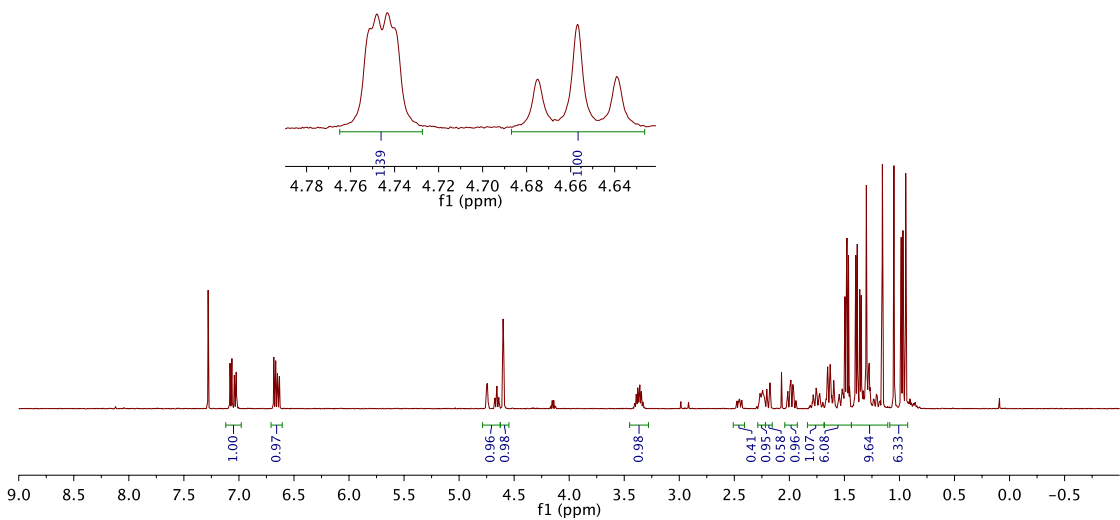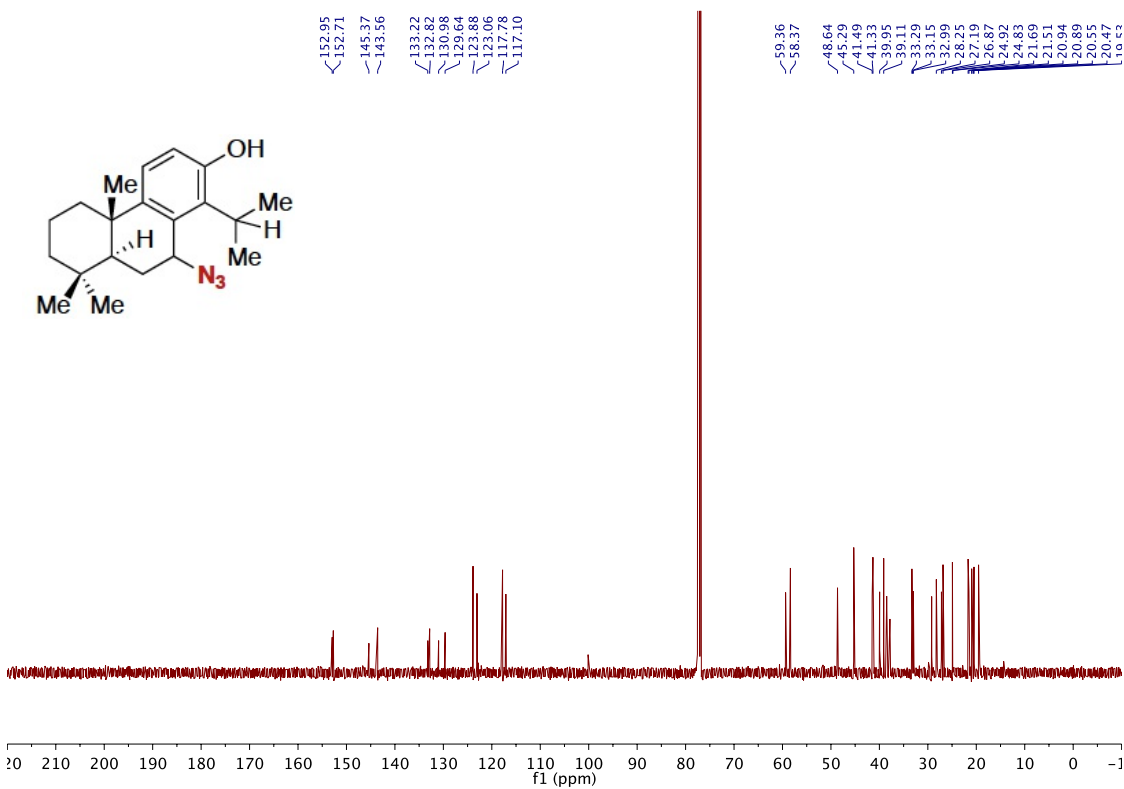

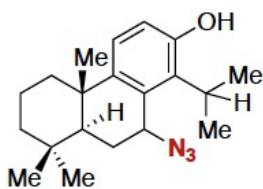

123.88  
123.07  
117.82  
117.13

59.37  
58.40

48.71  
45.32  
33.30  
33.00  
29.21  
28.26  
24.94  
24.82  
21.70  
21.53  
20.98  
20.88  
20.58  
20.50

DEPT135 NMR spectrum of azide **S14**

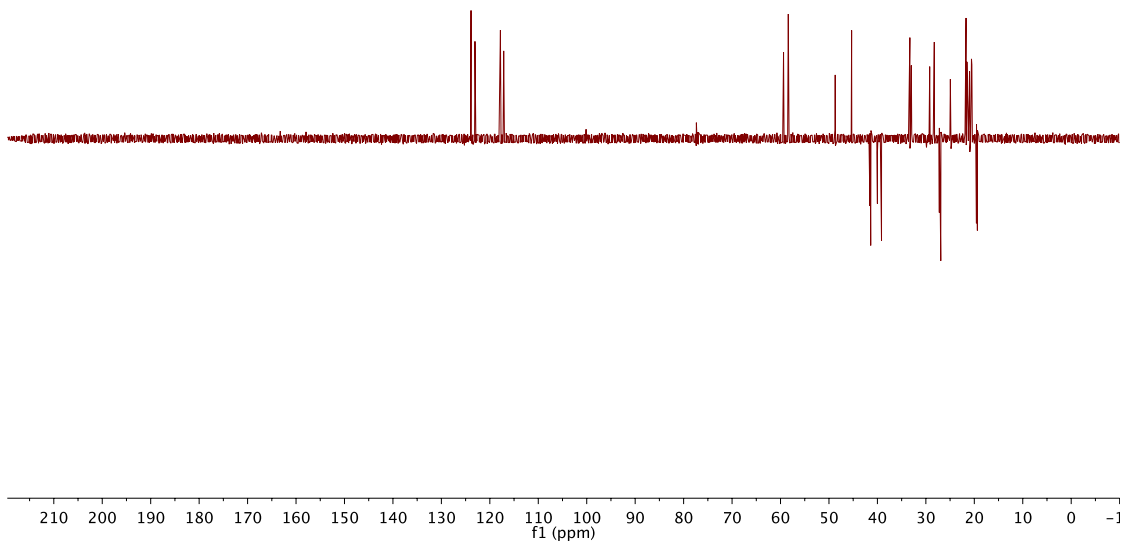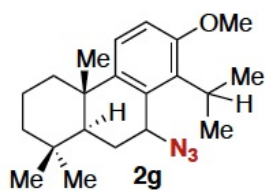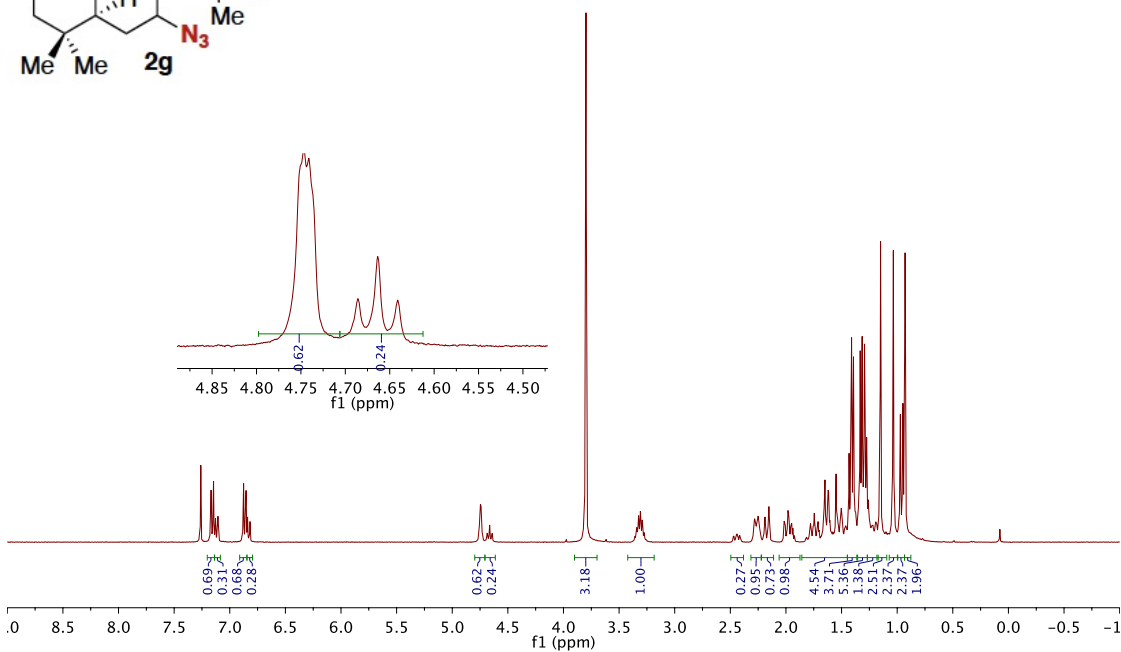

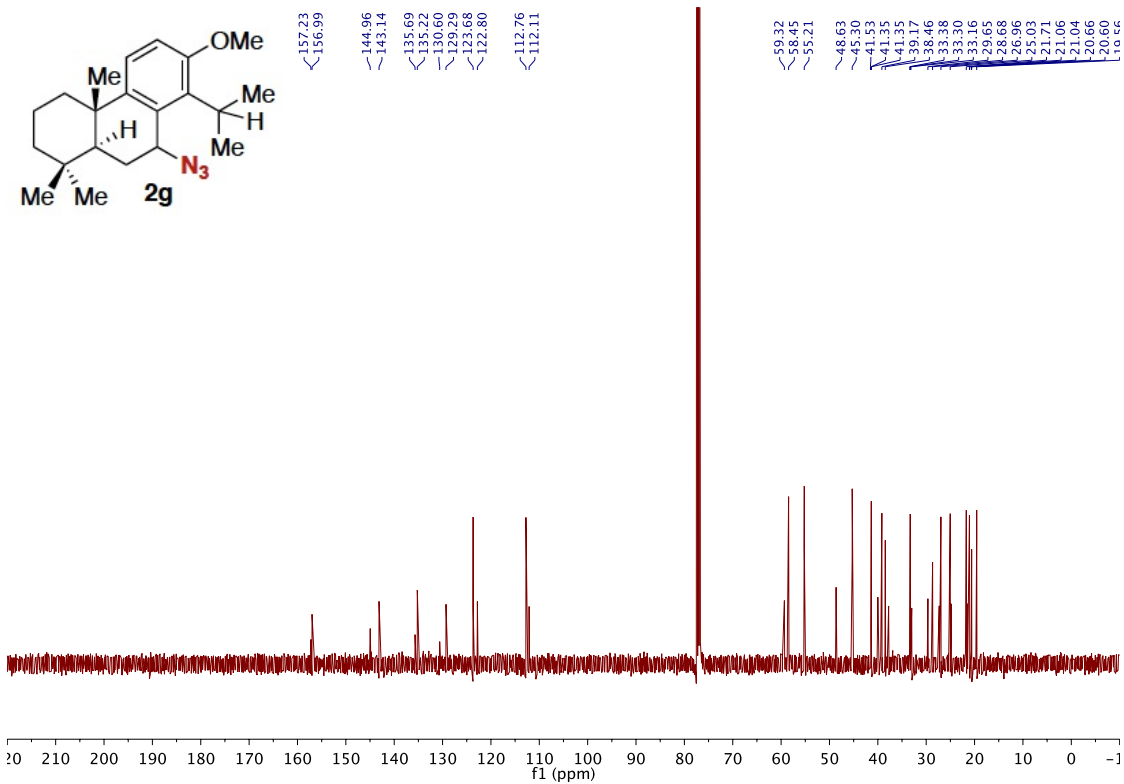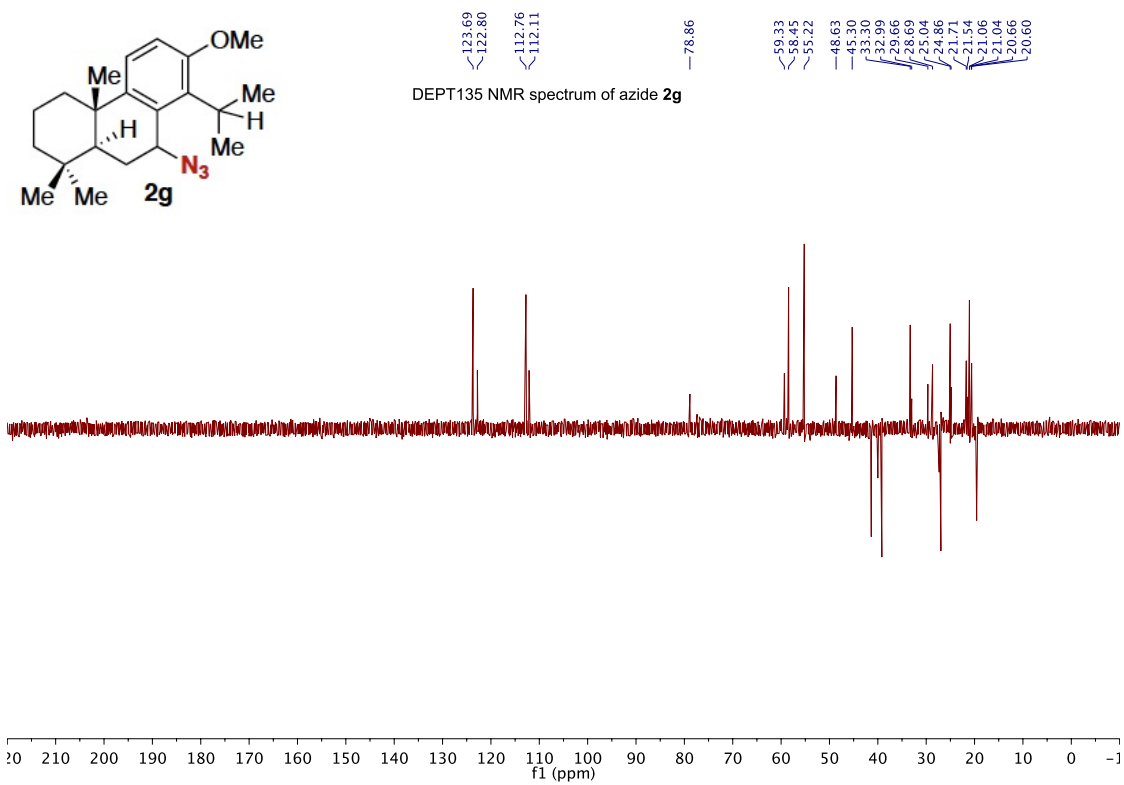

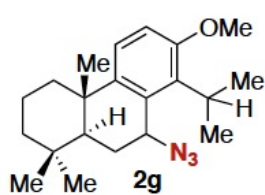

DEPT90 NMR spectrum of azide **2g**

Chemical shifts (ppm): 123.69, 122.80, 112.76, 112.11, 59.32, 58.45, 48.63, 45.30, 29.65, 28.68

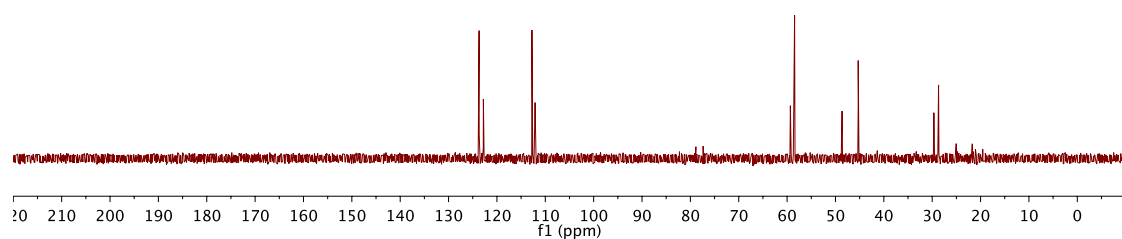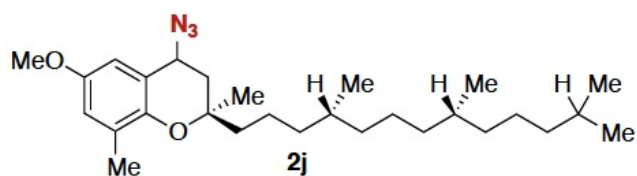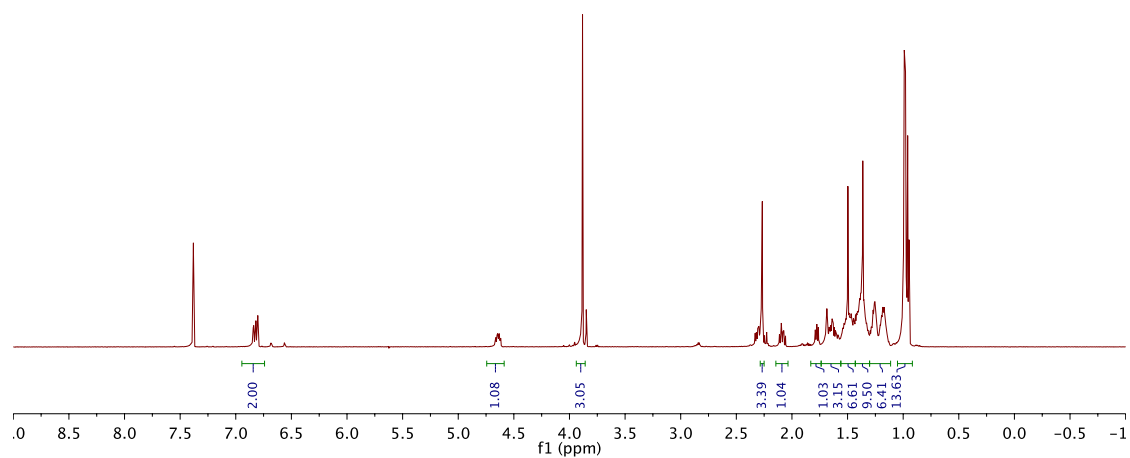





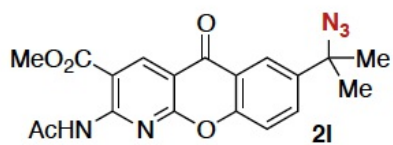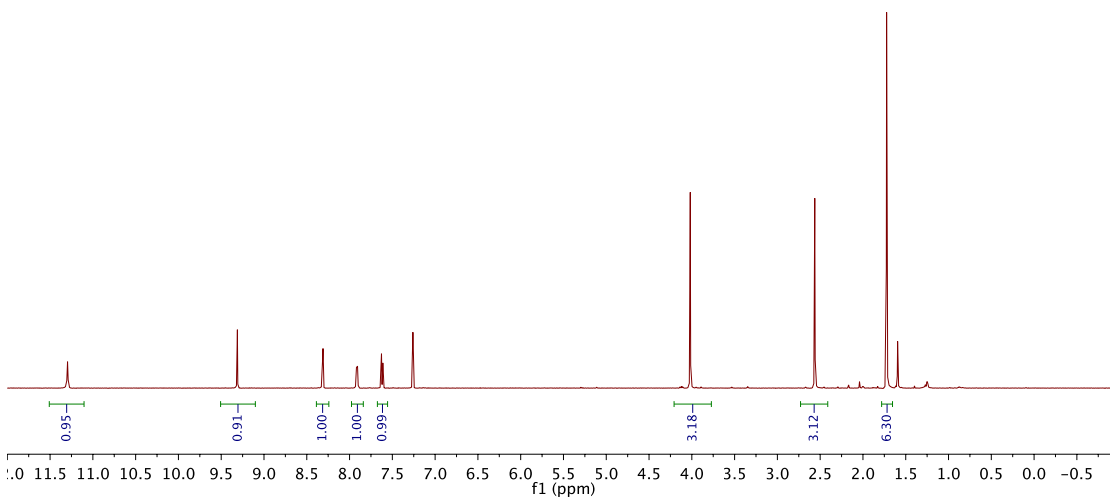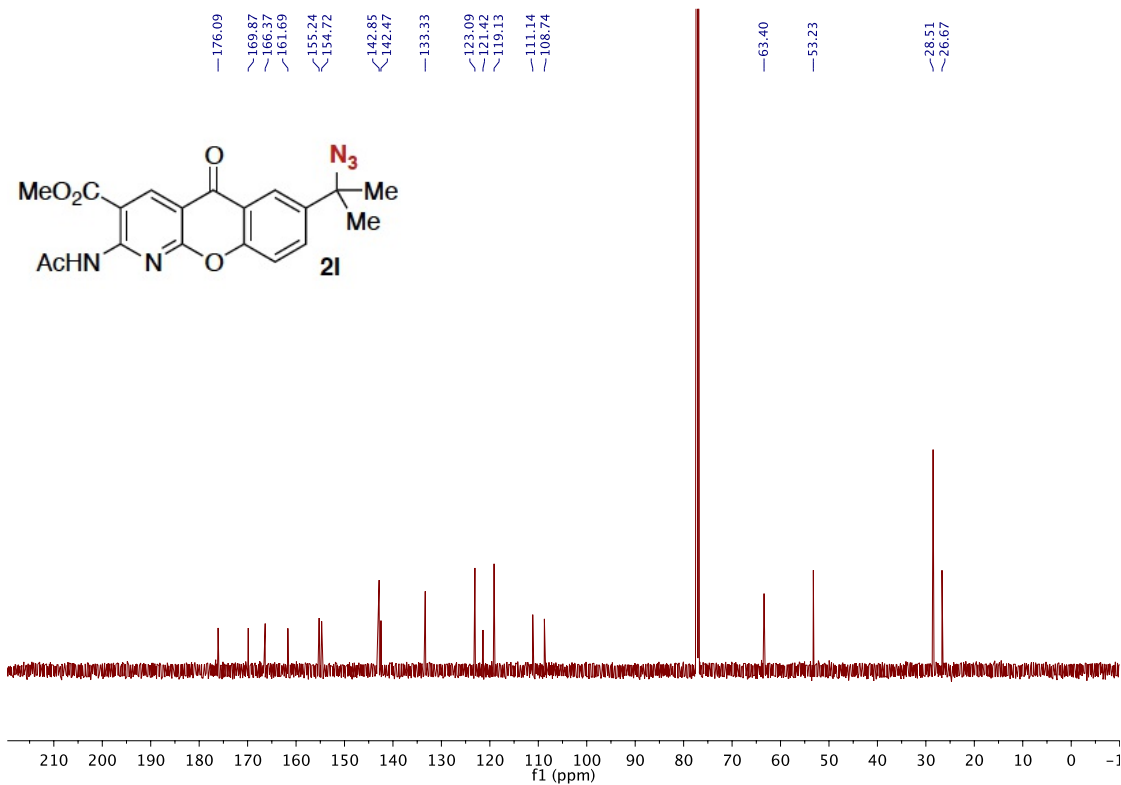

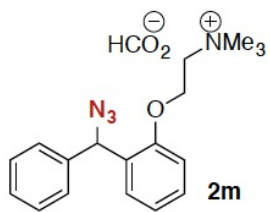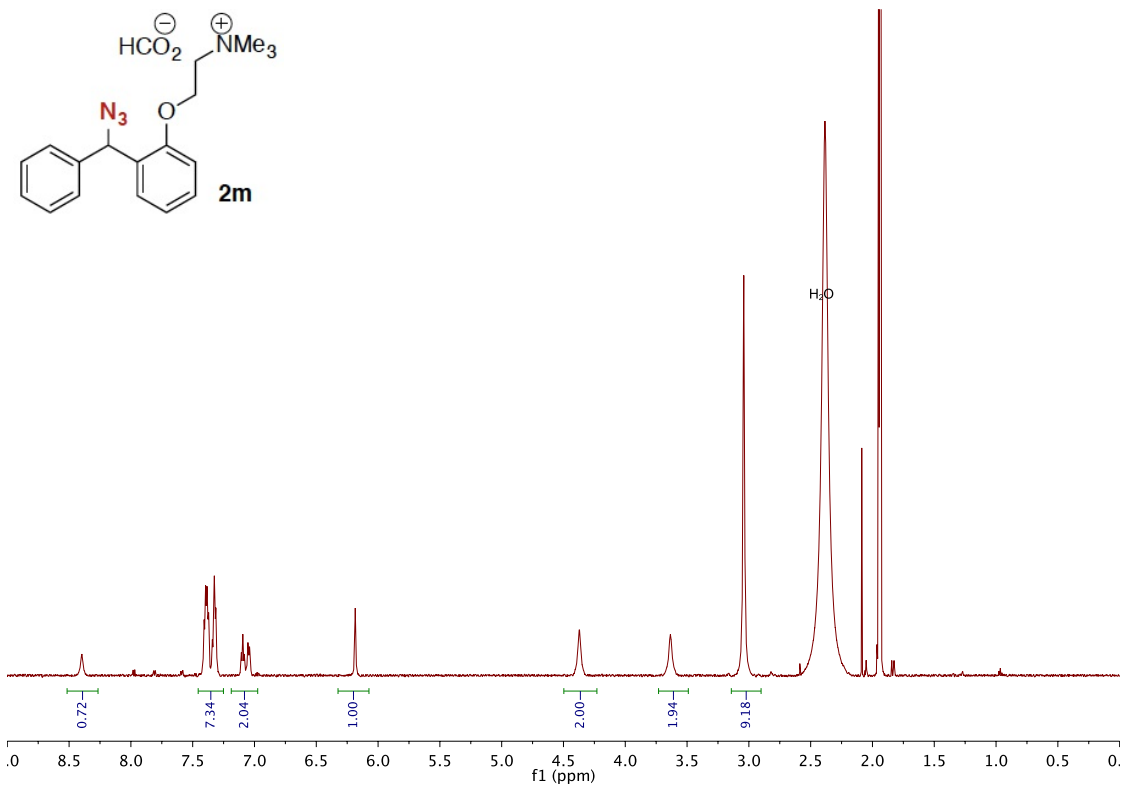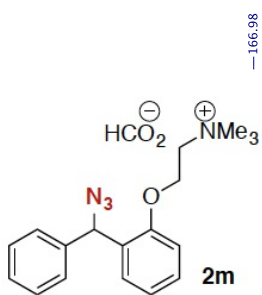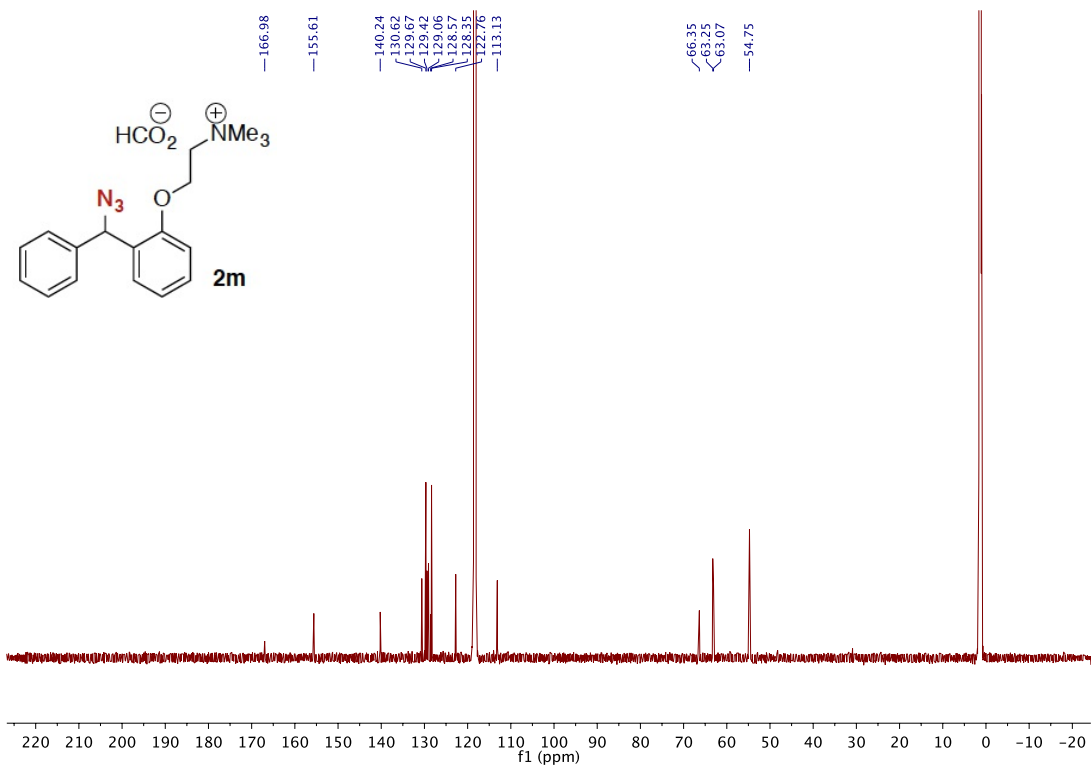

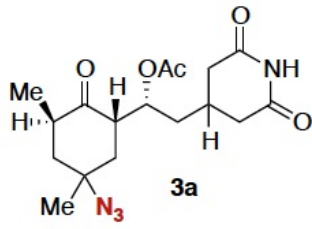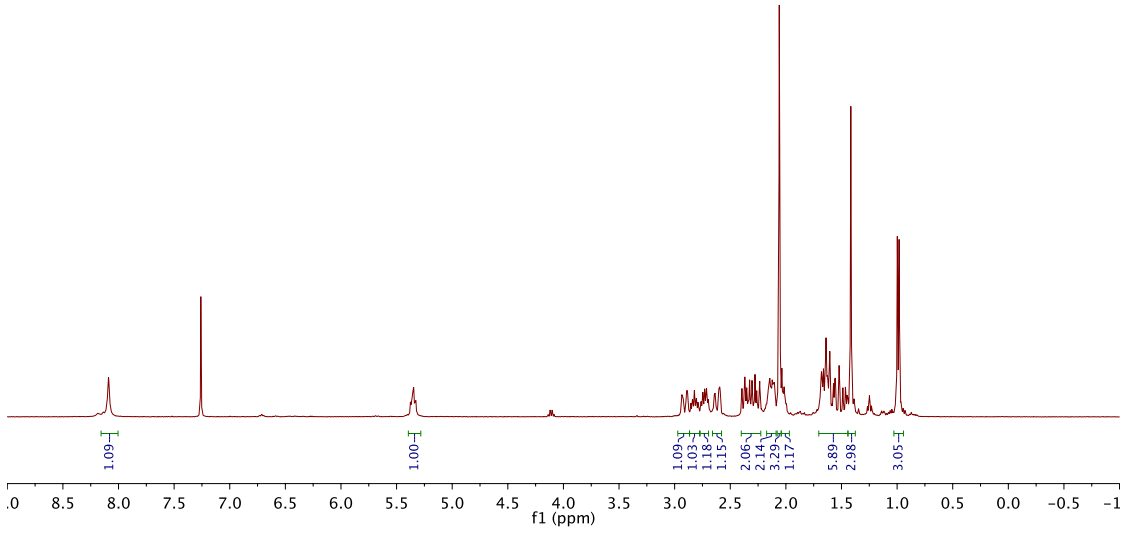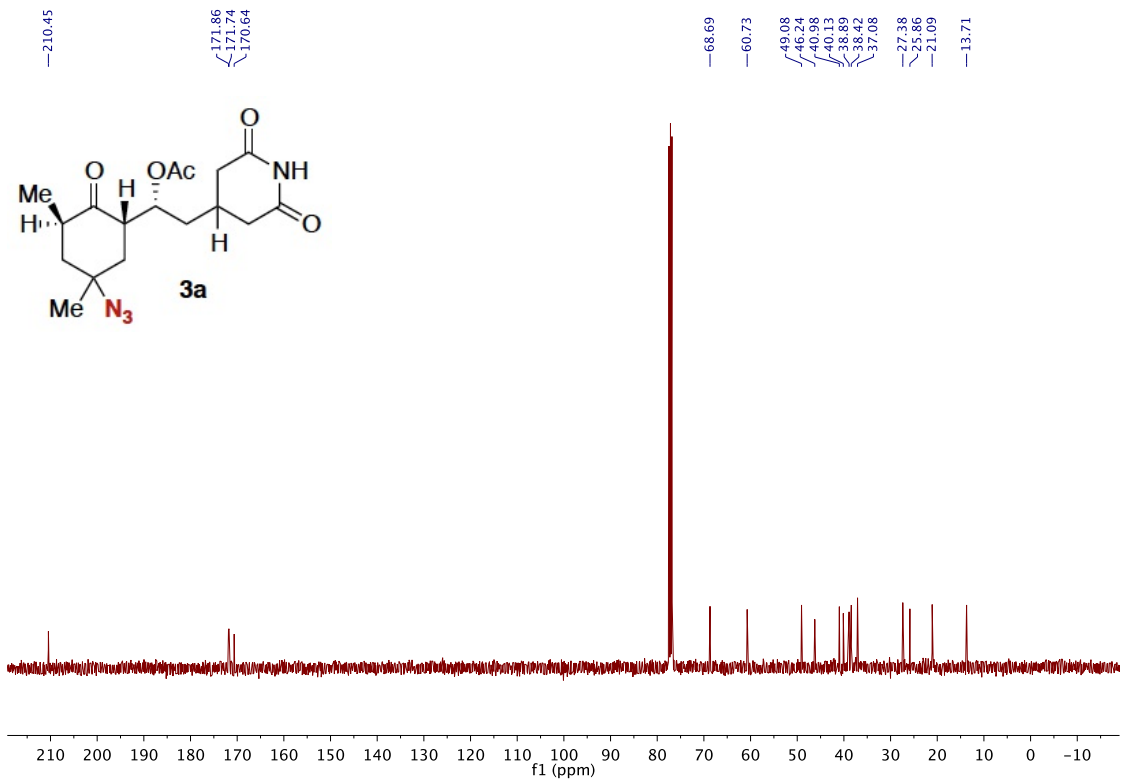



DEPT135 NMR spectrum of azide **3a**

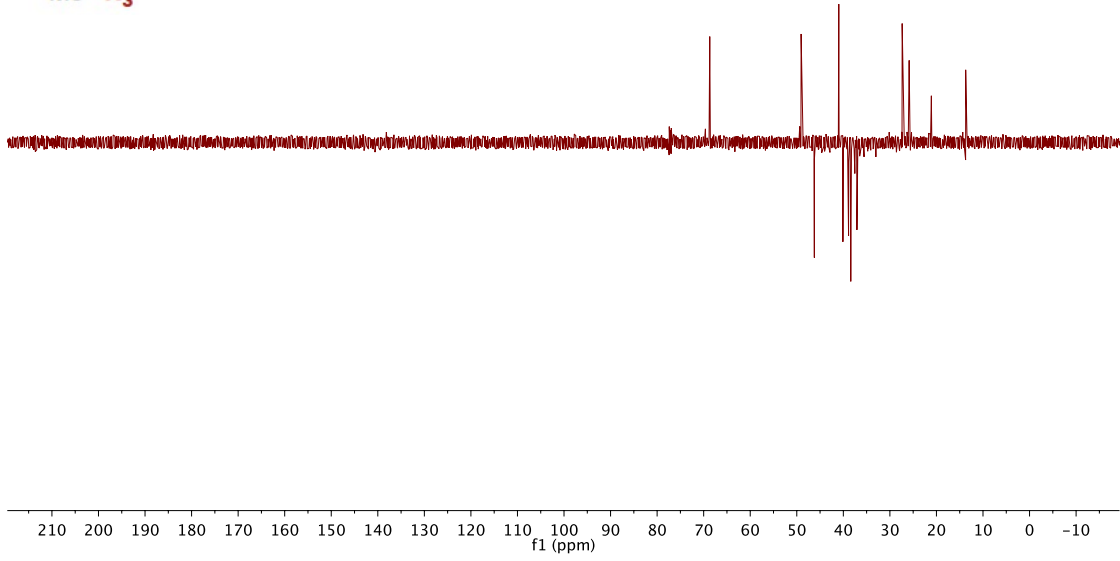

$^1\text{H}$ - $^{13}\text{C}$  HMBC spectrum of azide **3a**

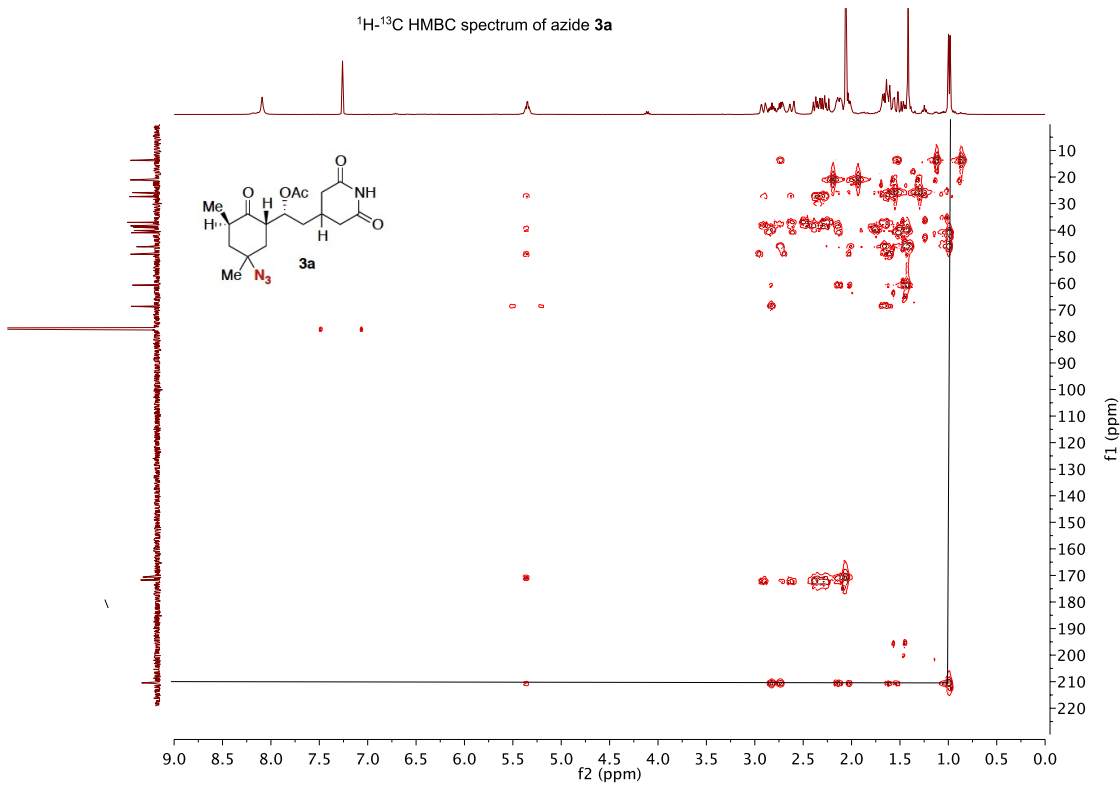

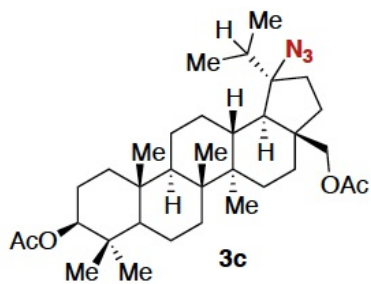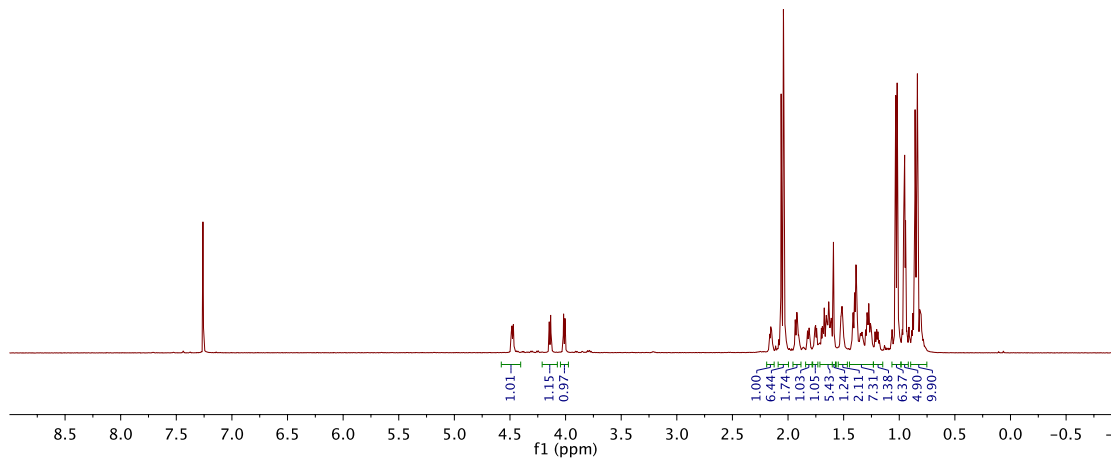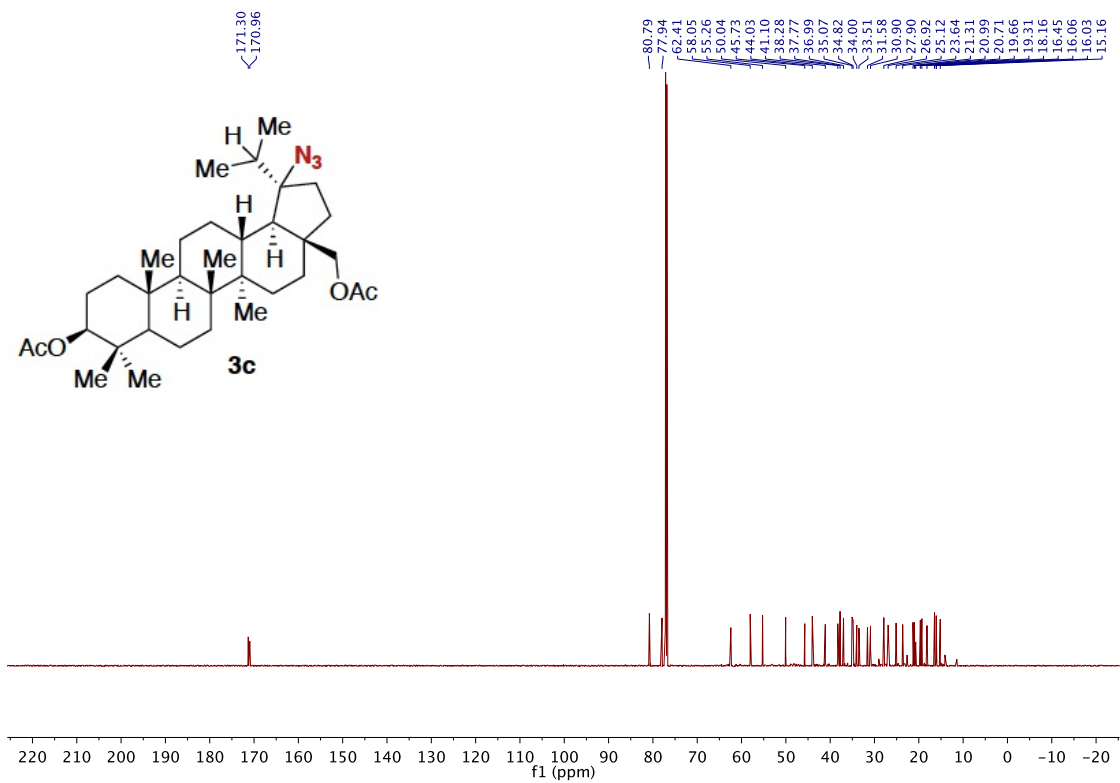

$^1\text{H}$ - $^1\text{H}$  gCOSY NMR spectrum of azide **3c**

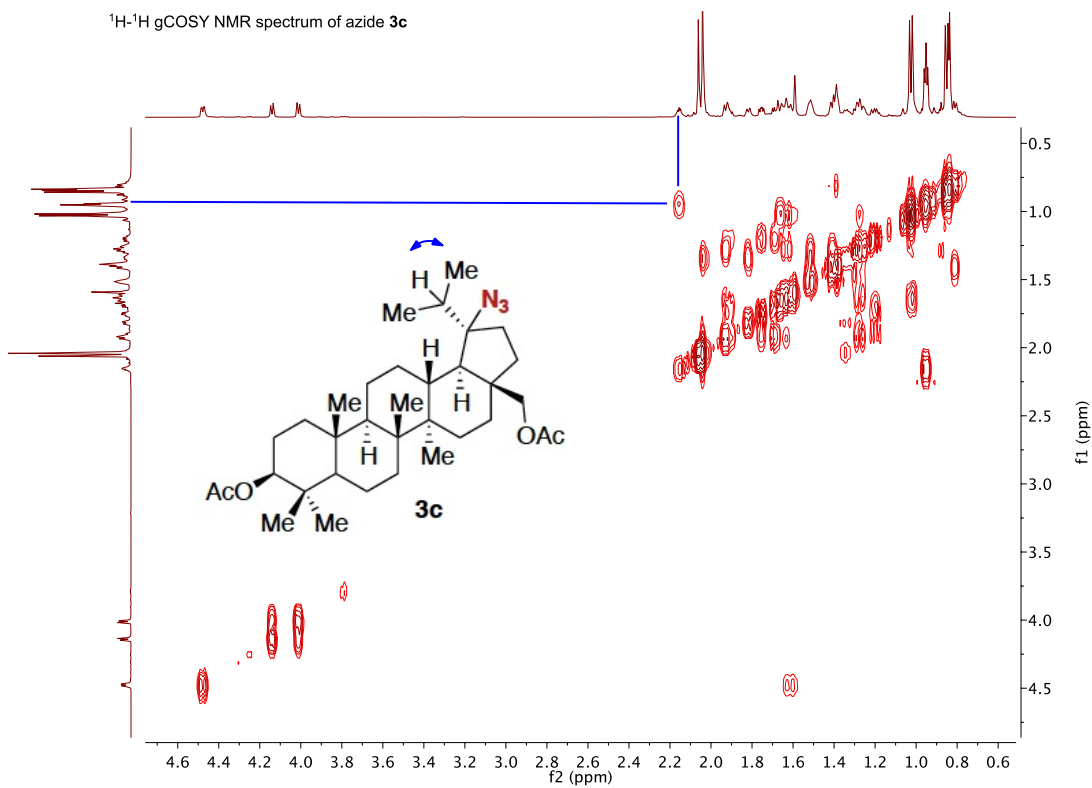

$^1\text{H}$ - $^{13}\text{C}$  gHSQC NMR spectrum of azide **3c**

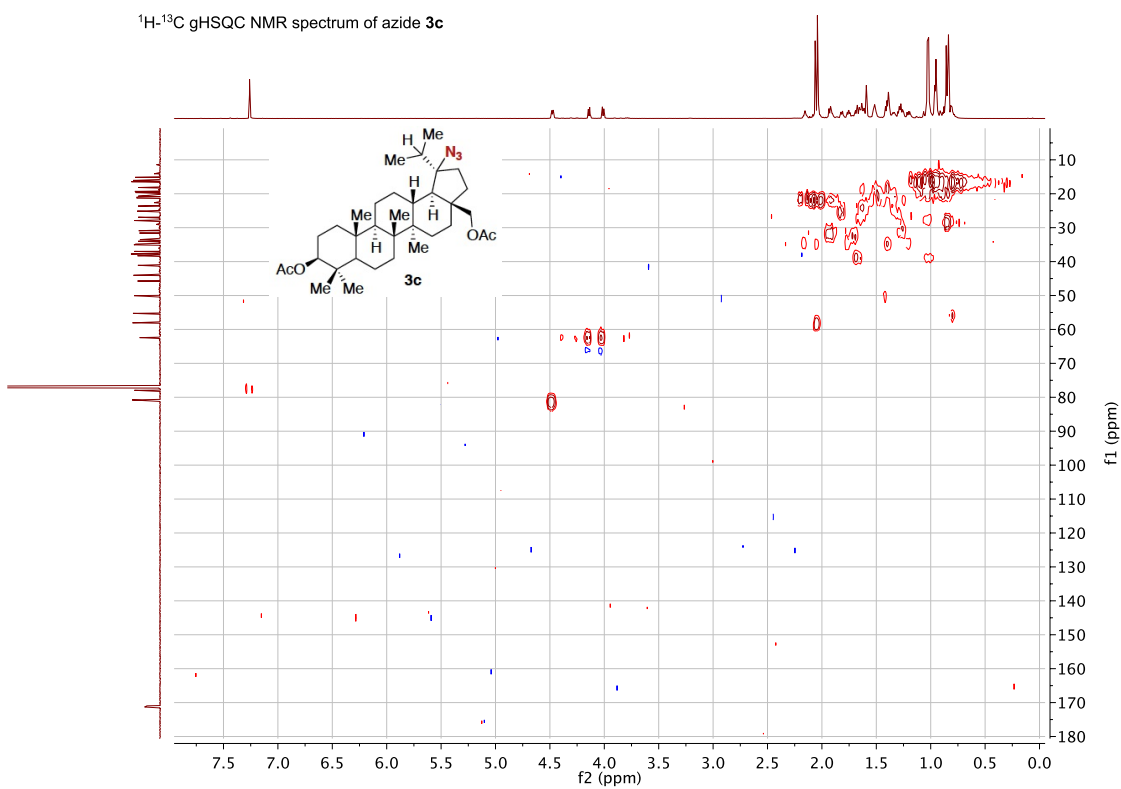

$^1\text{H}$ - $^{13}\text{C}$  gHMBC NMR spectrum of azide **3c**

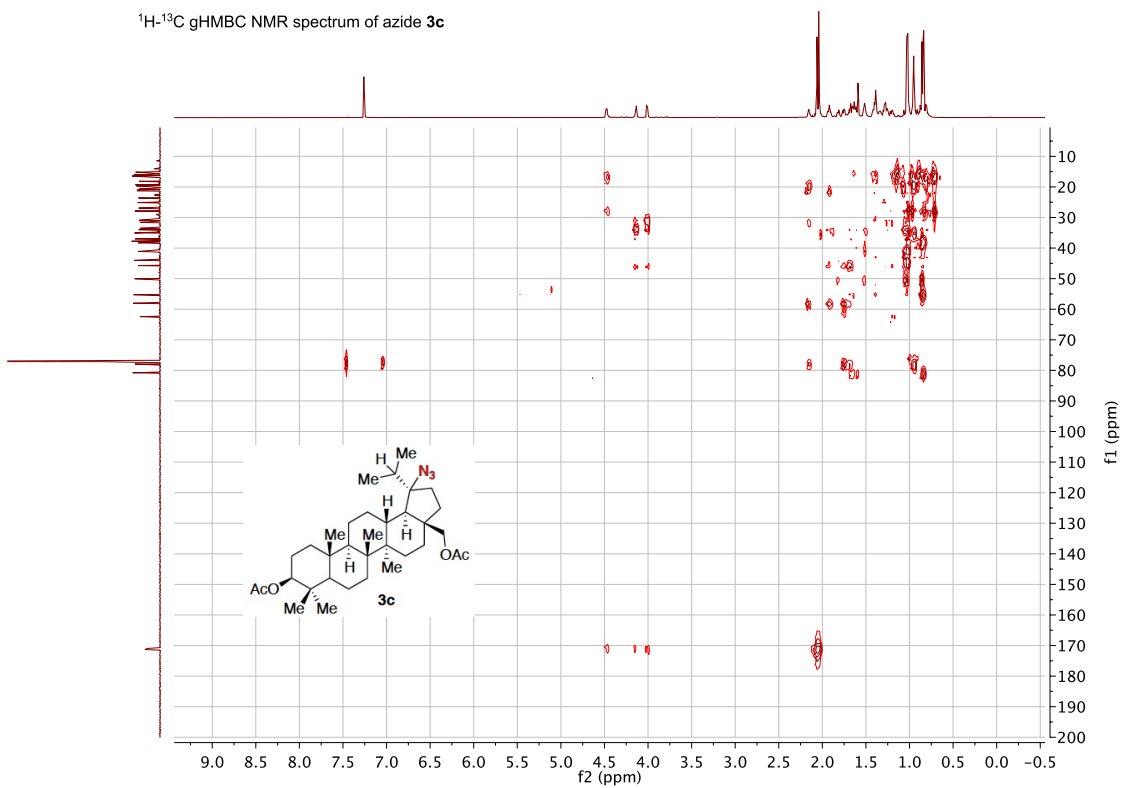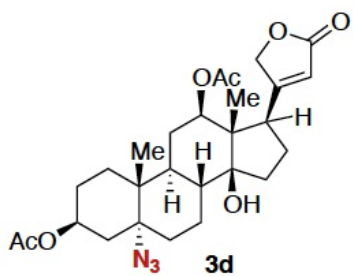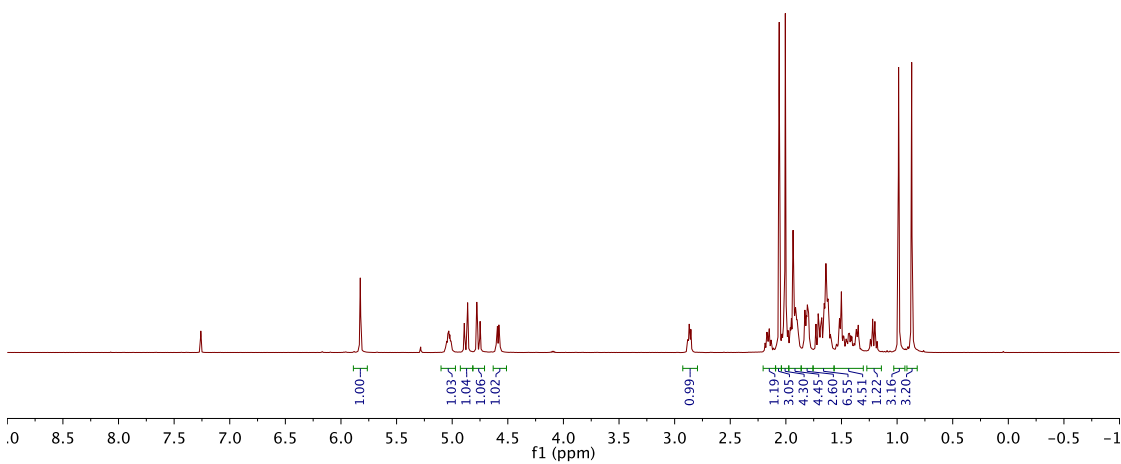



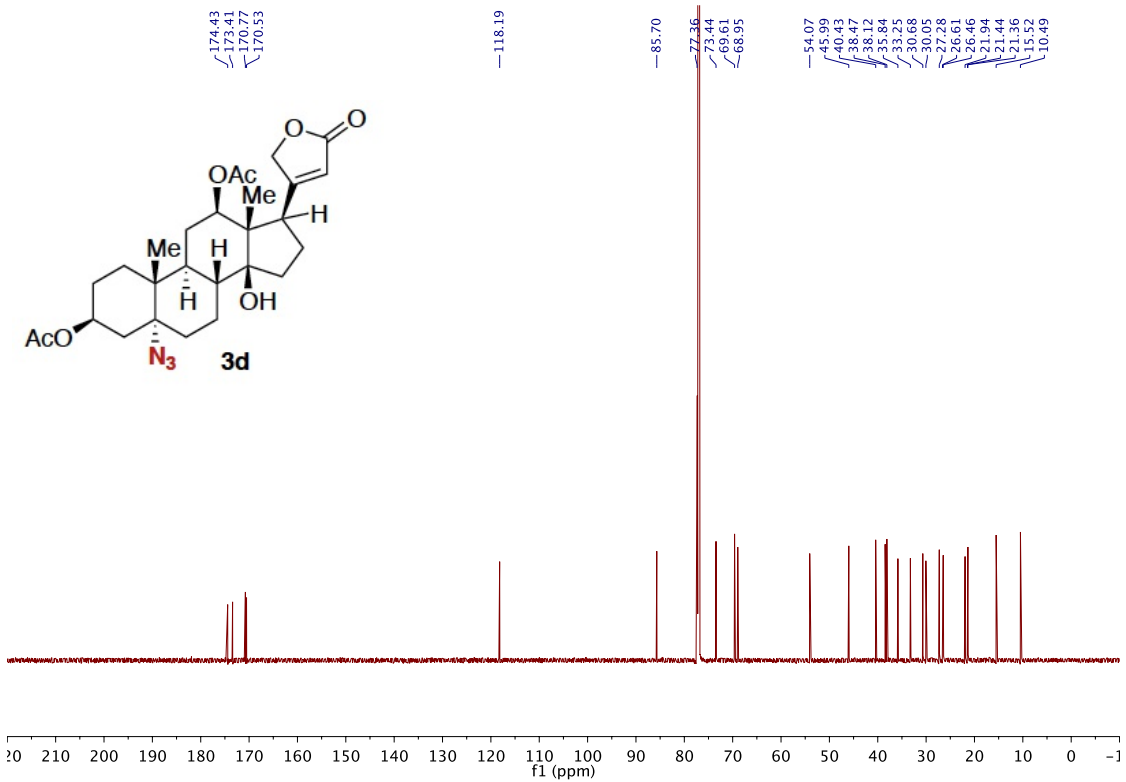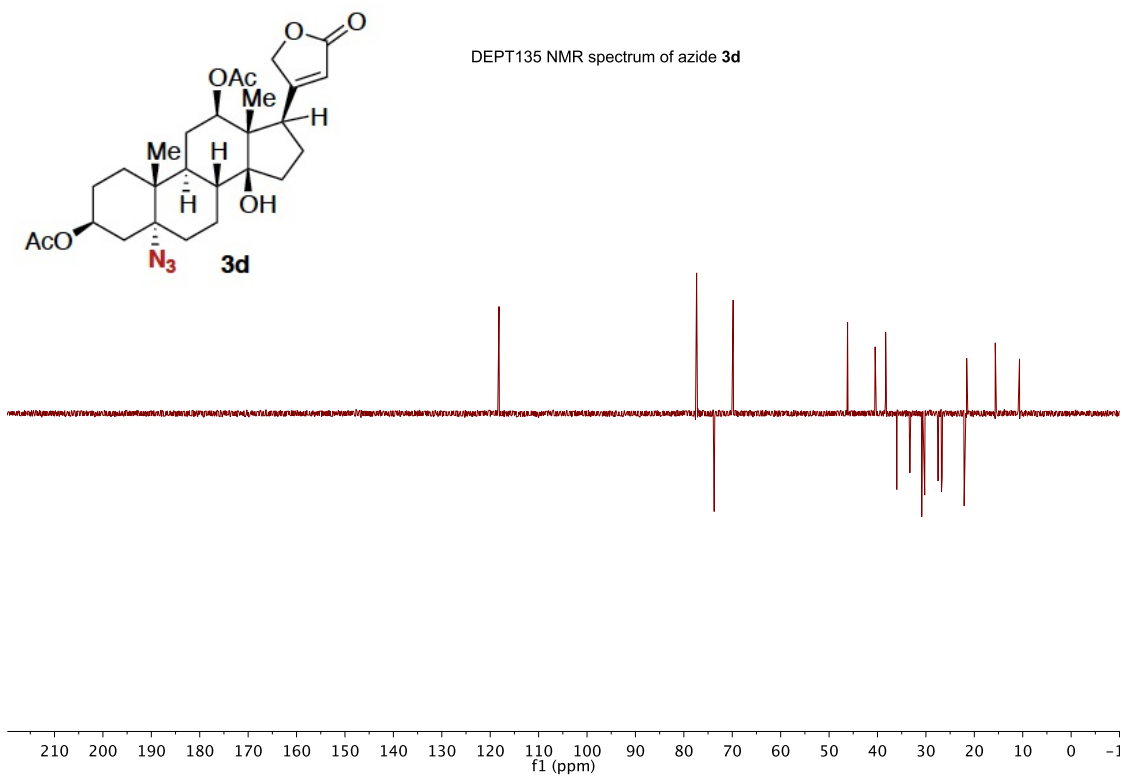

<sup>1</sup>H-<sup>1</sup>H COSY NMR spectrum of azide **3d**

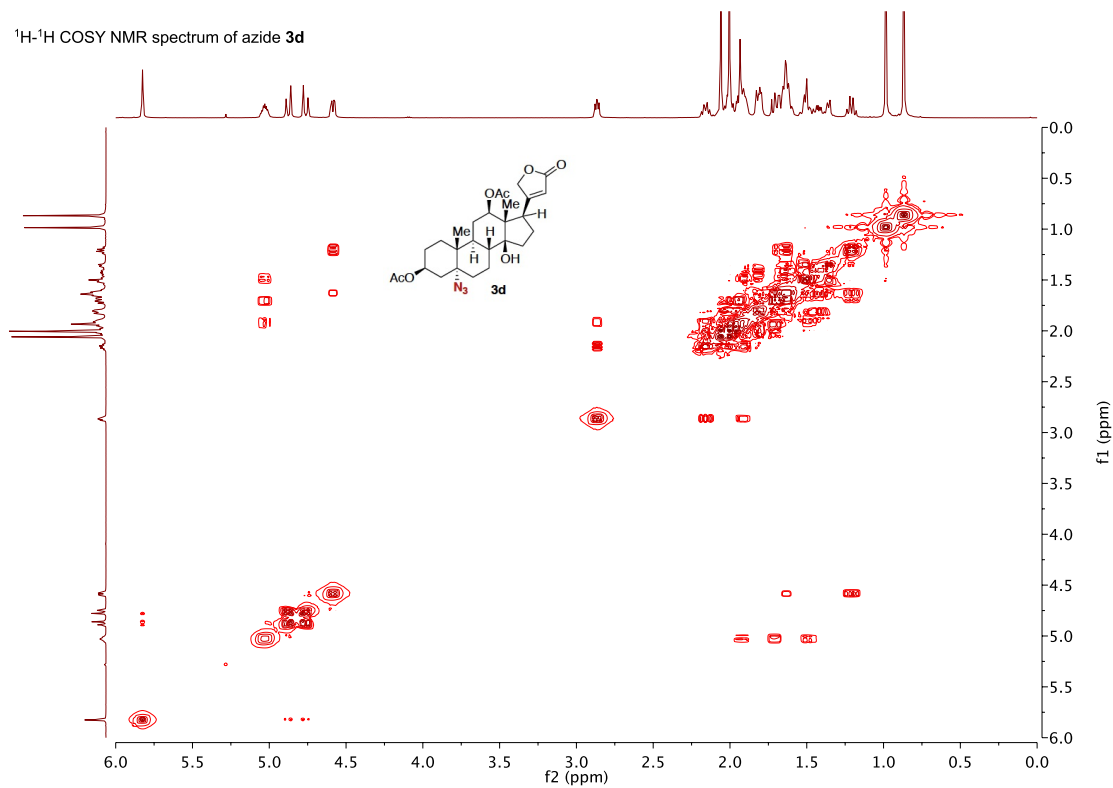

<sup>1</sup>H-<sup>13</sup>C gHSQC NMR spectrum of azide **3d**

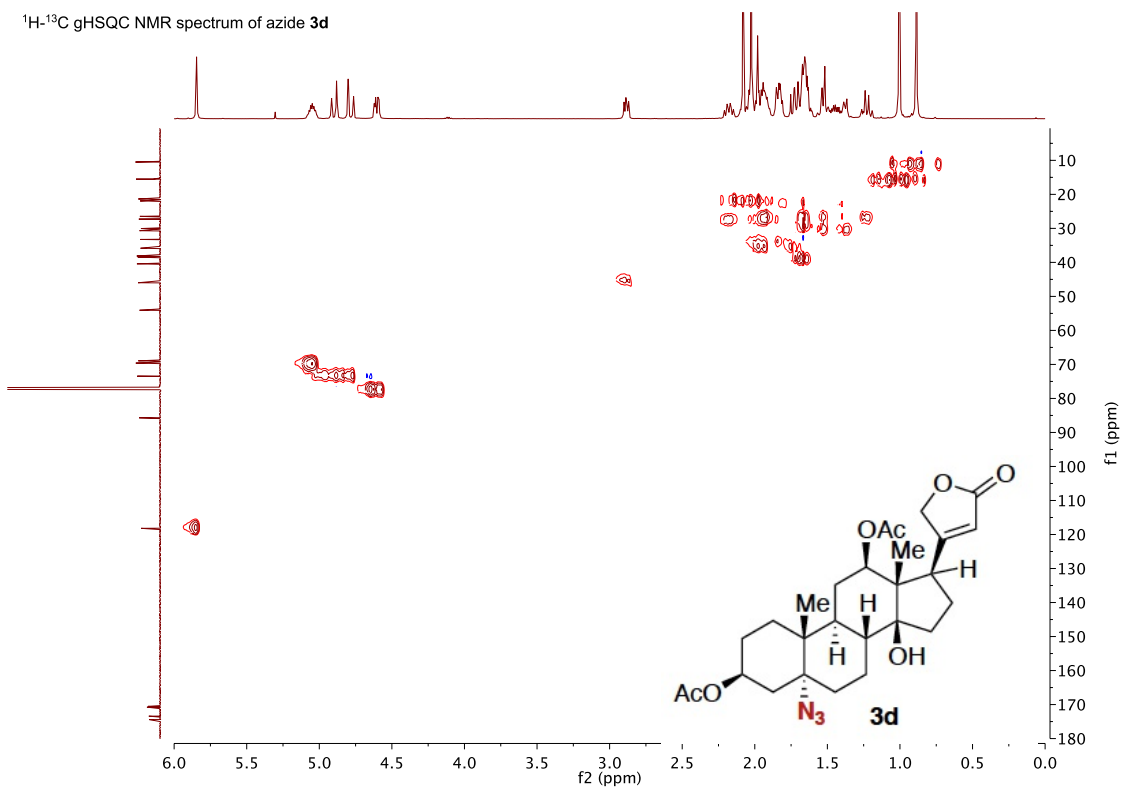

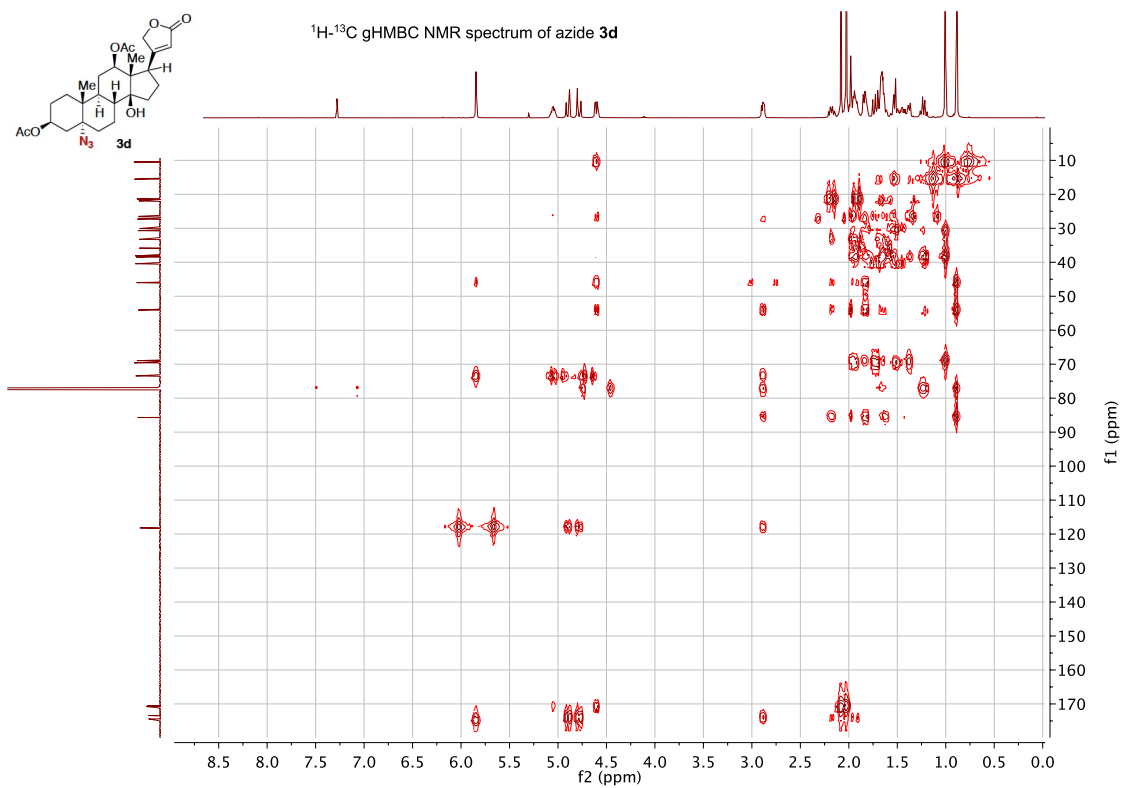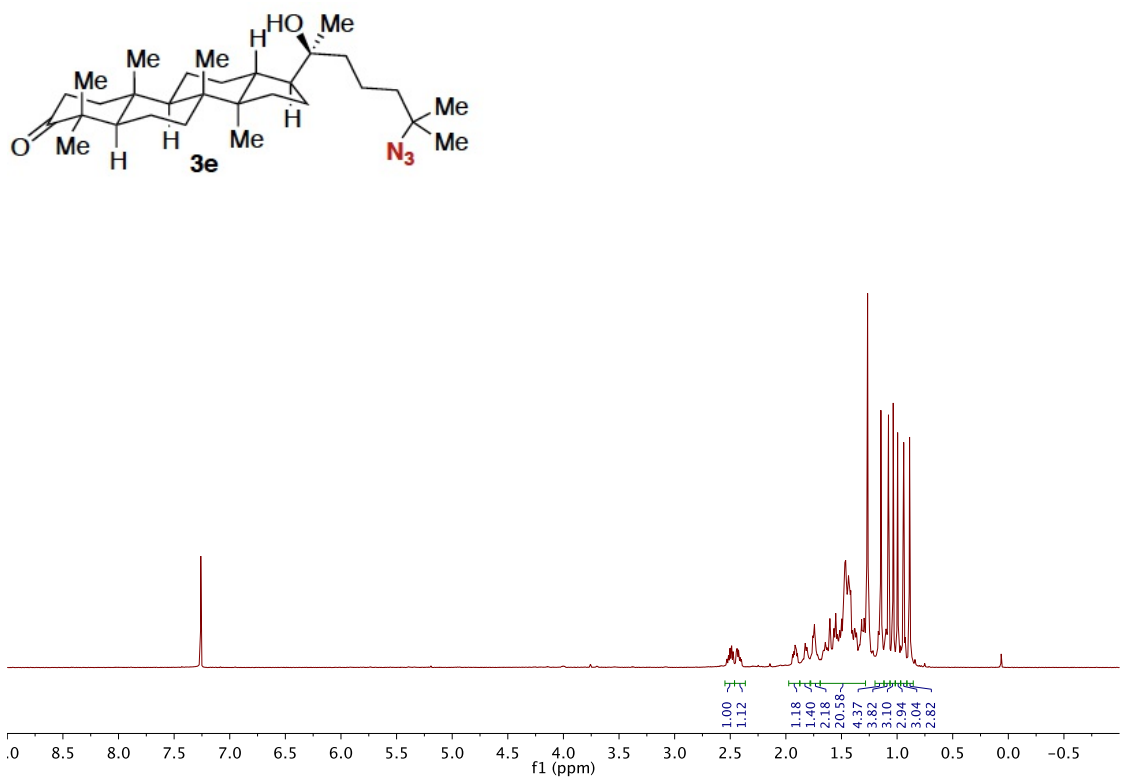

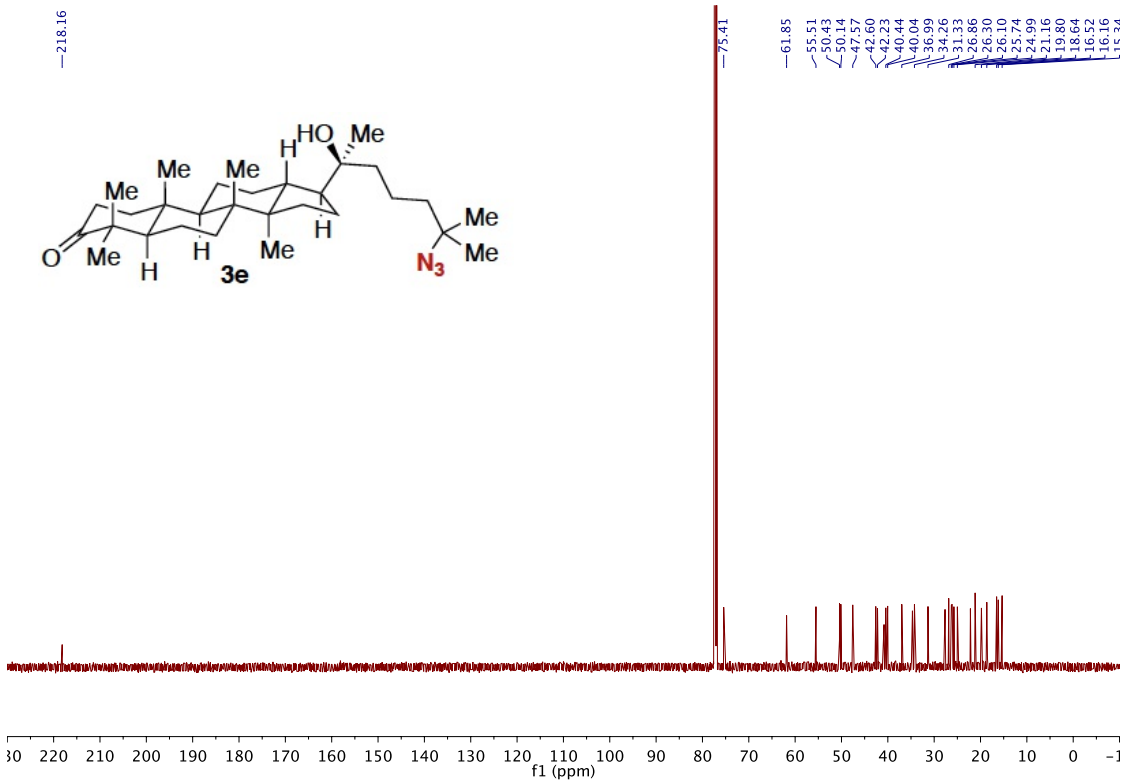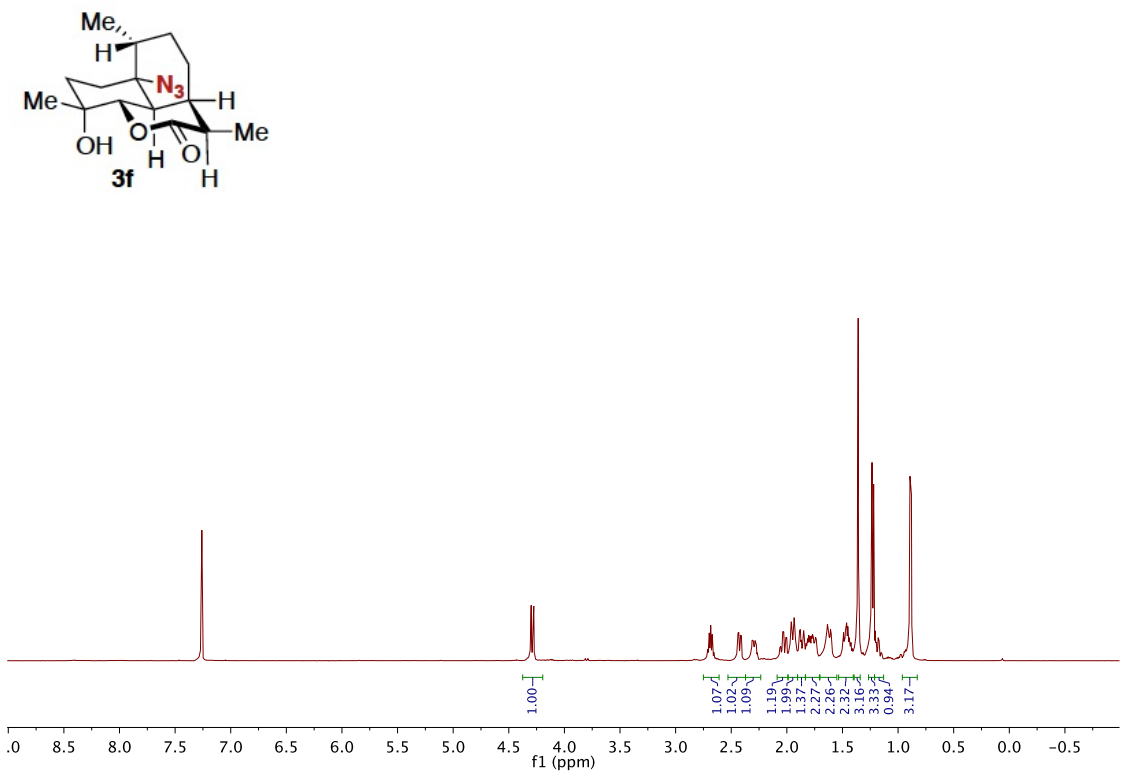

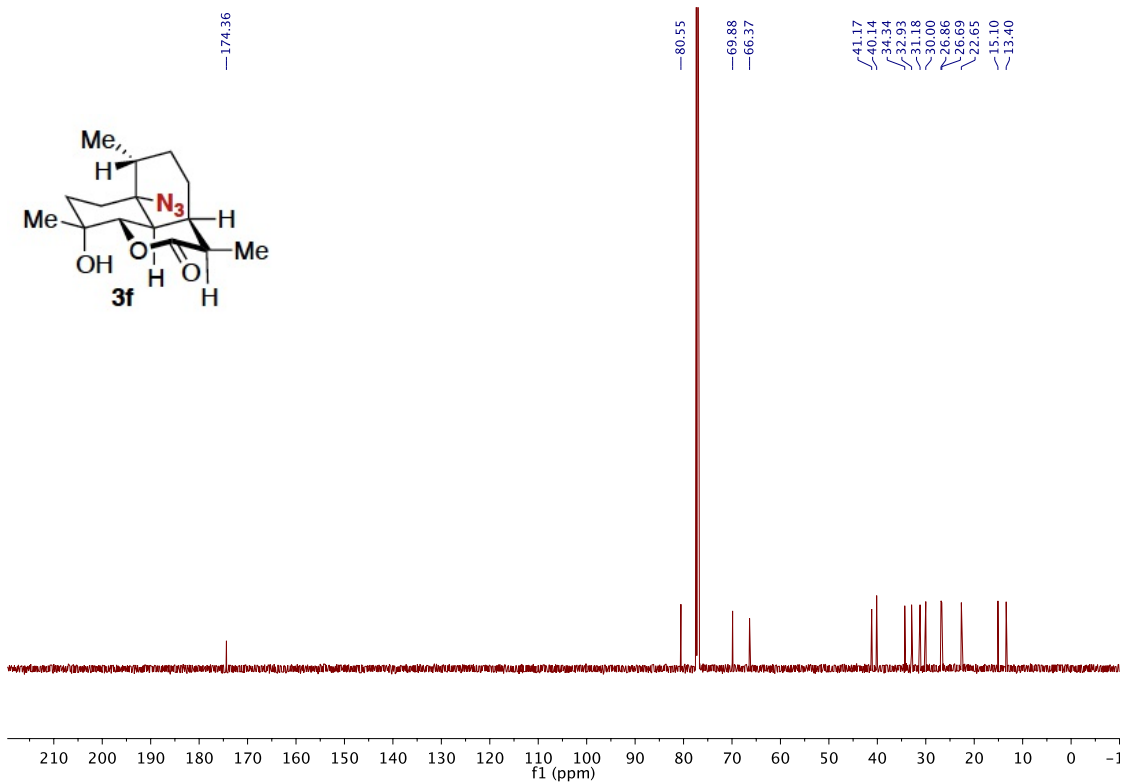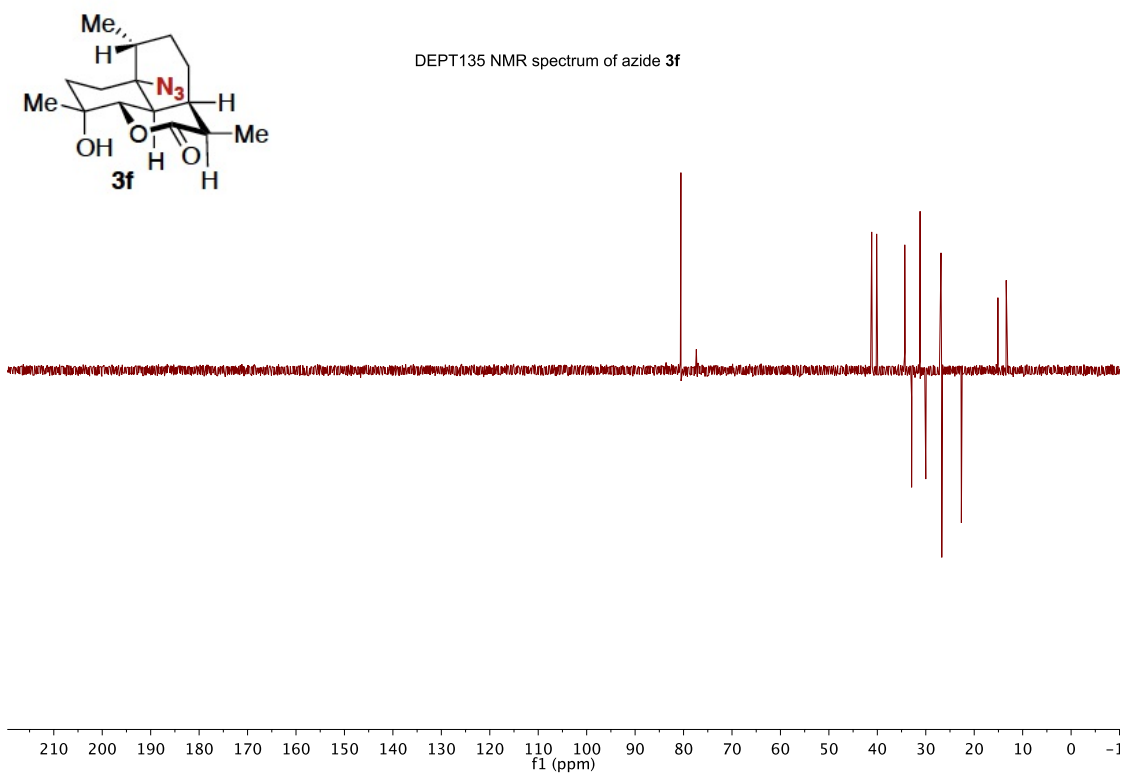

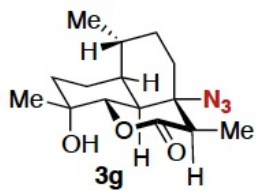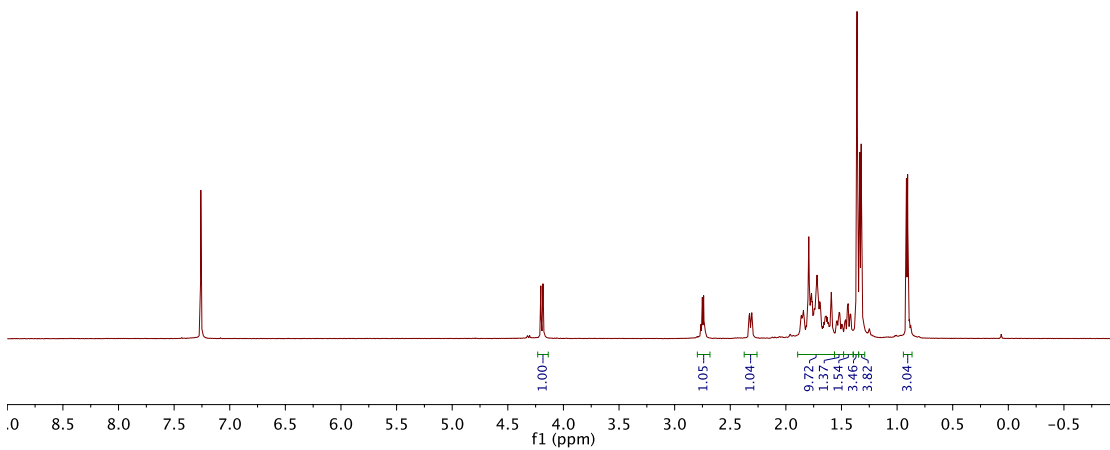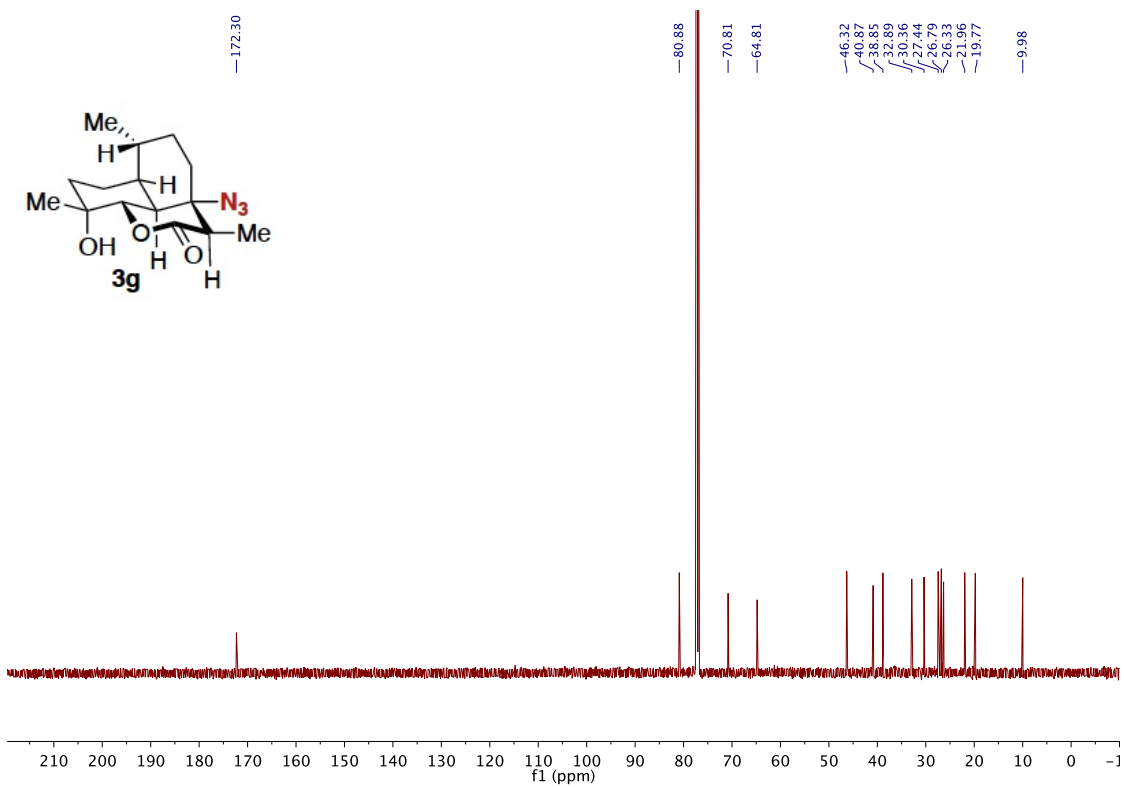

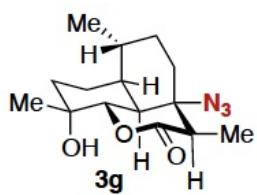

DEPT135 NMR spectrum of azide **3g**

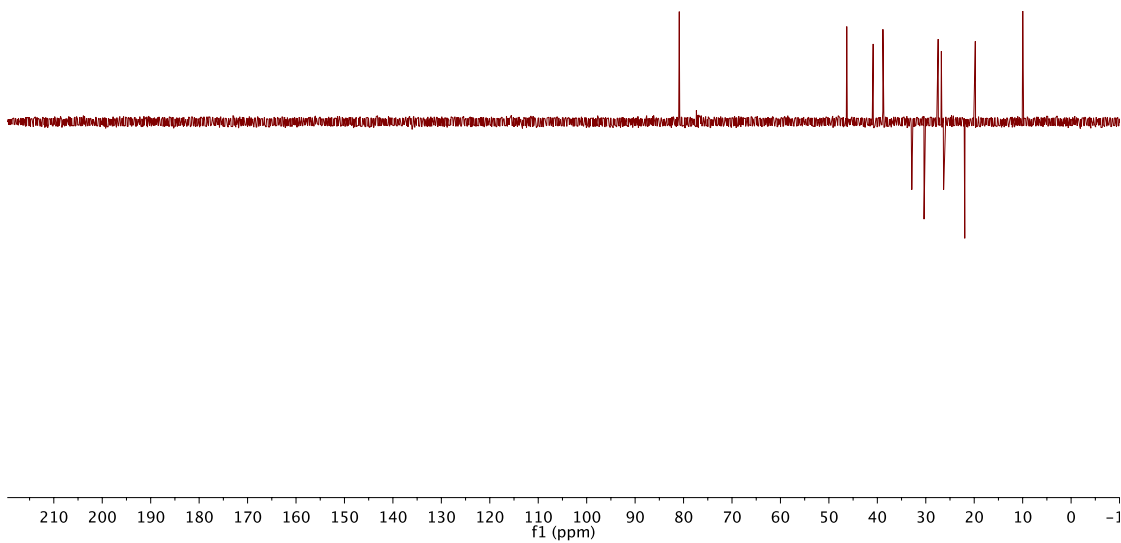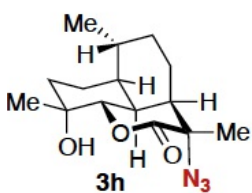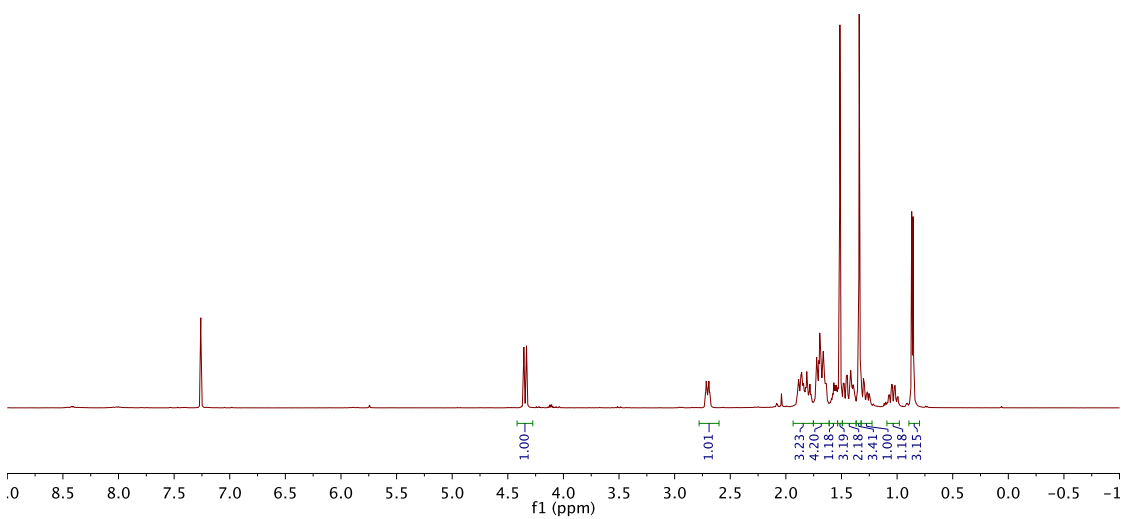

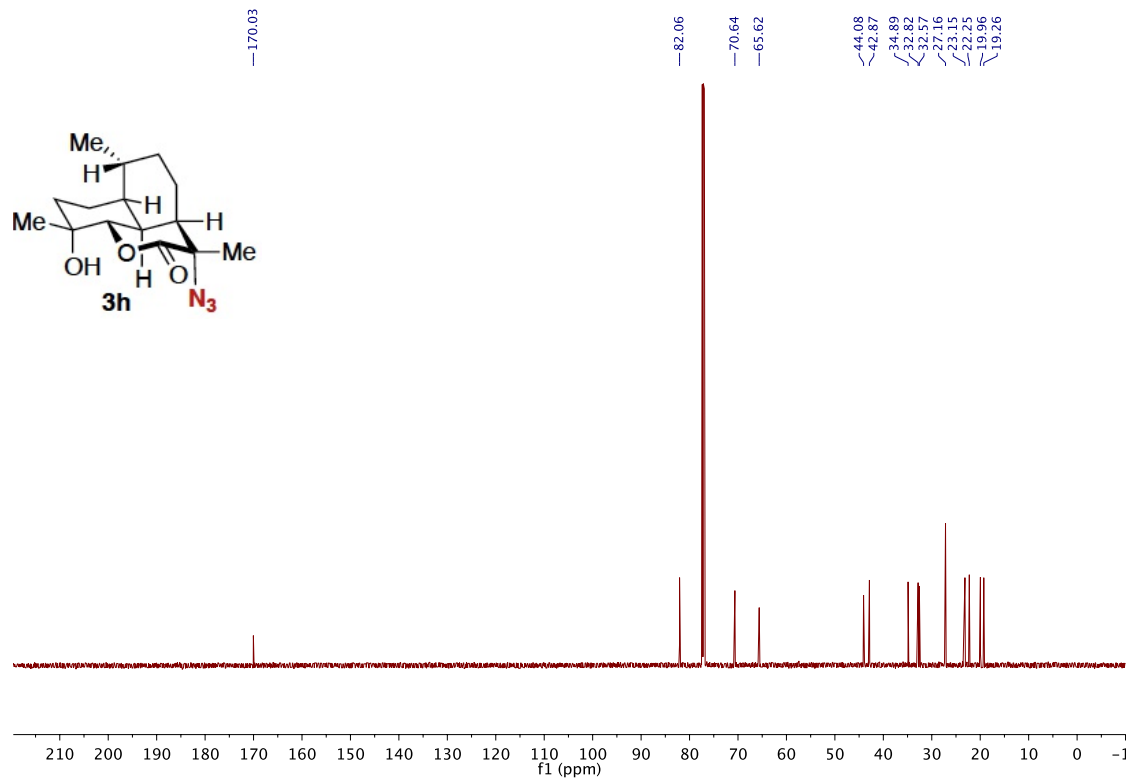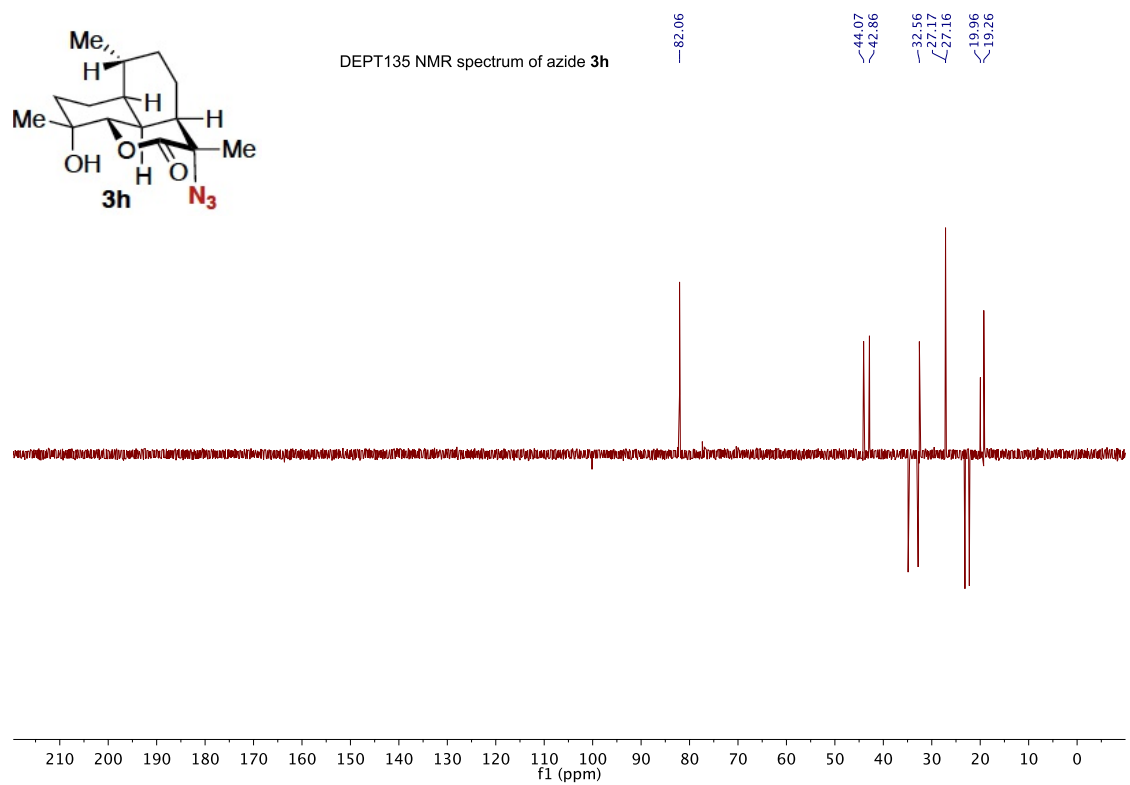



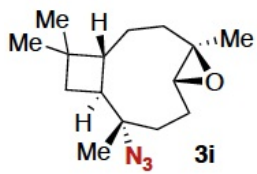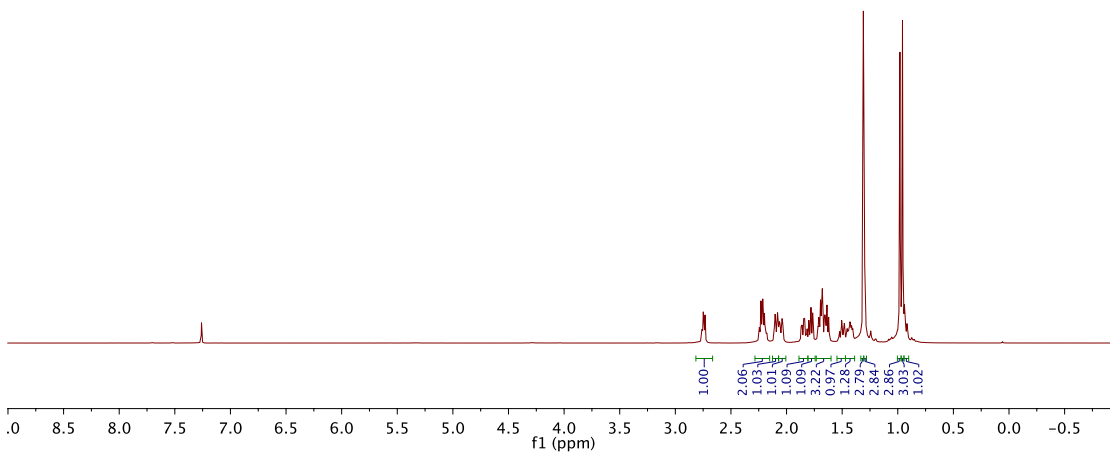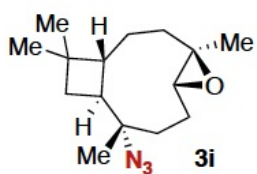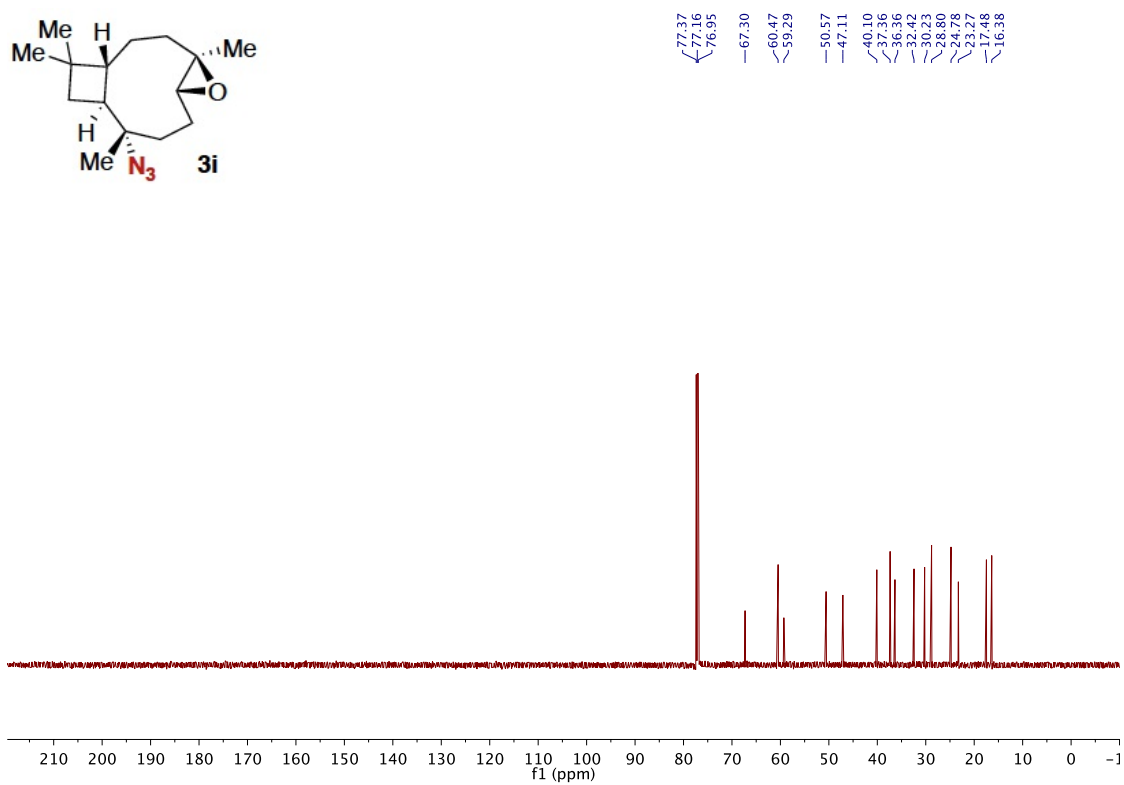

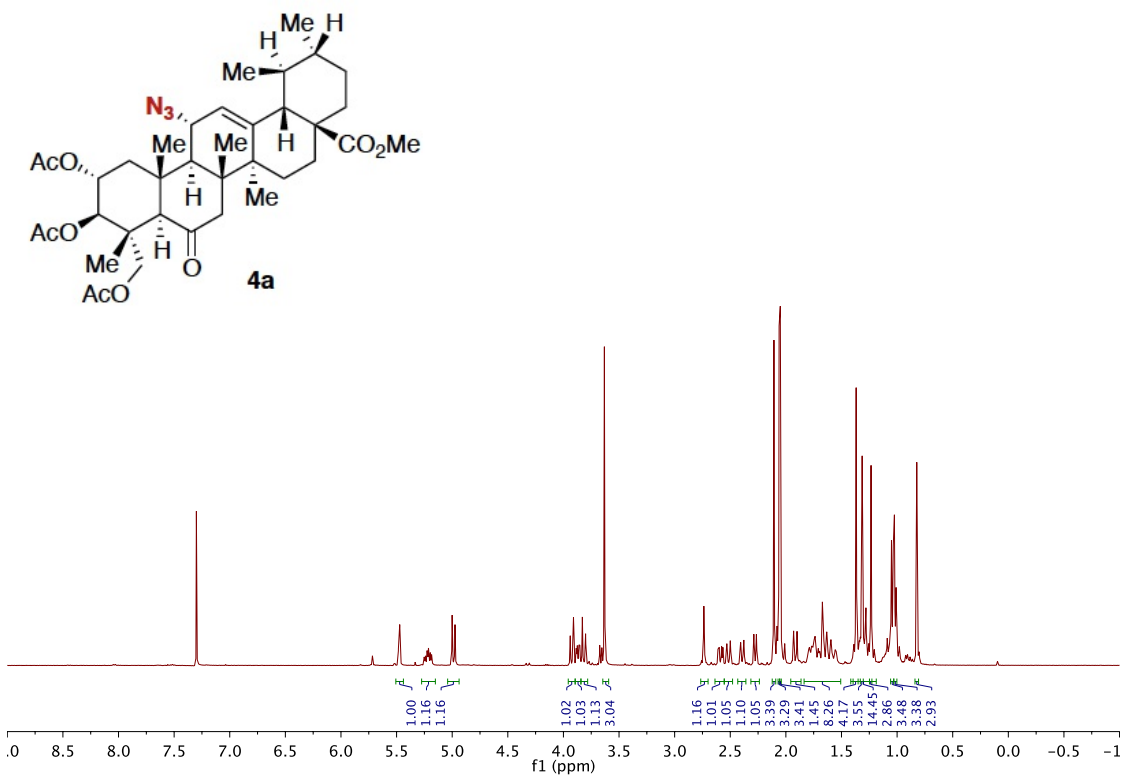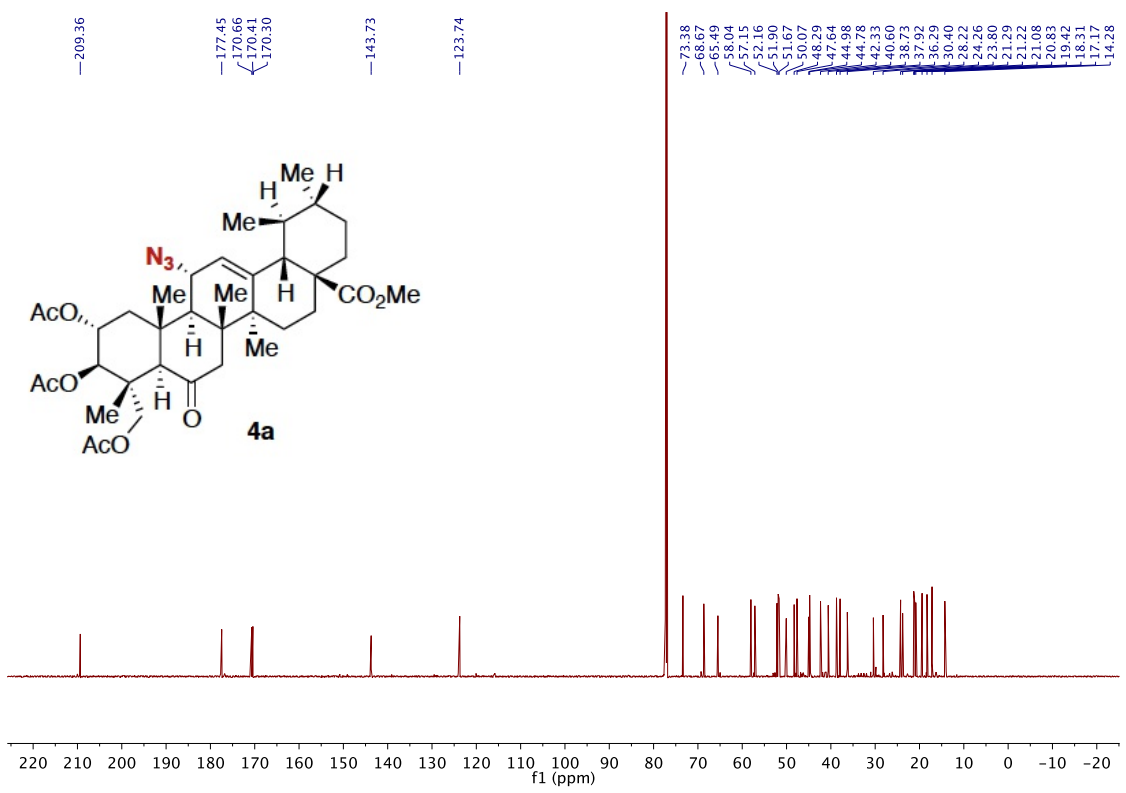

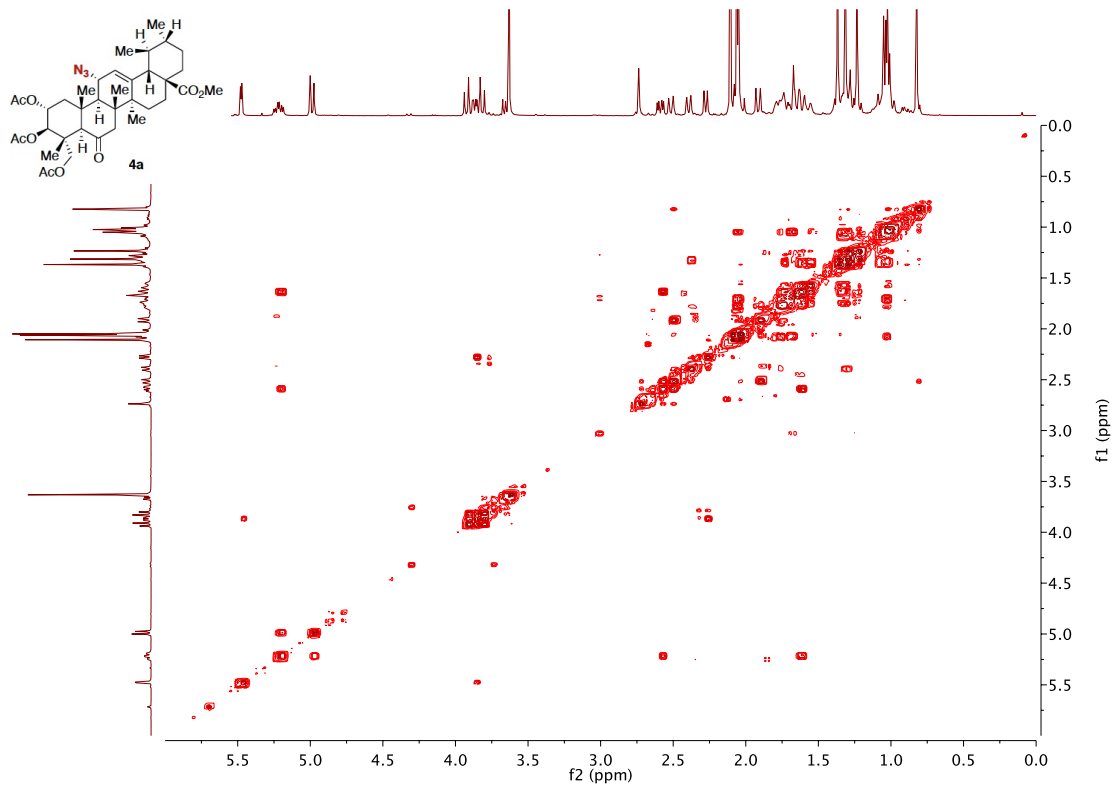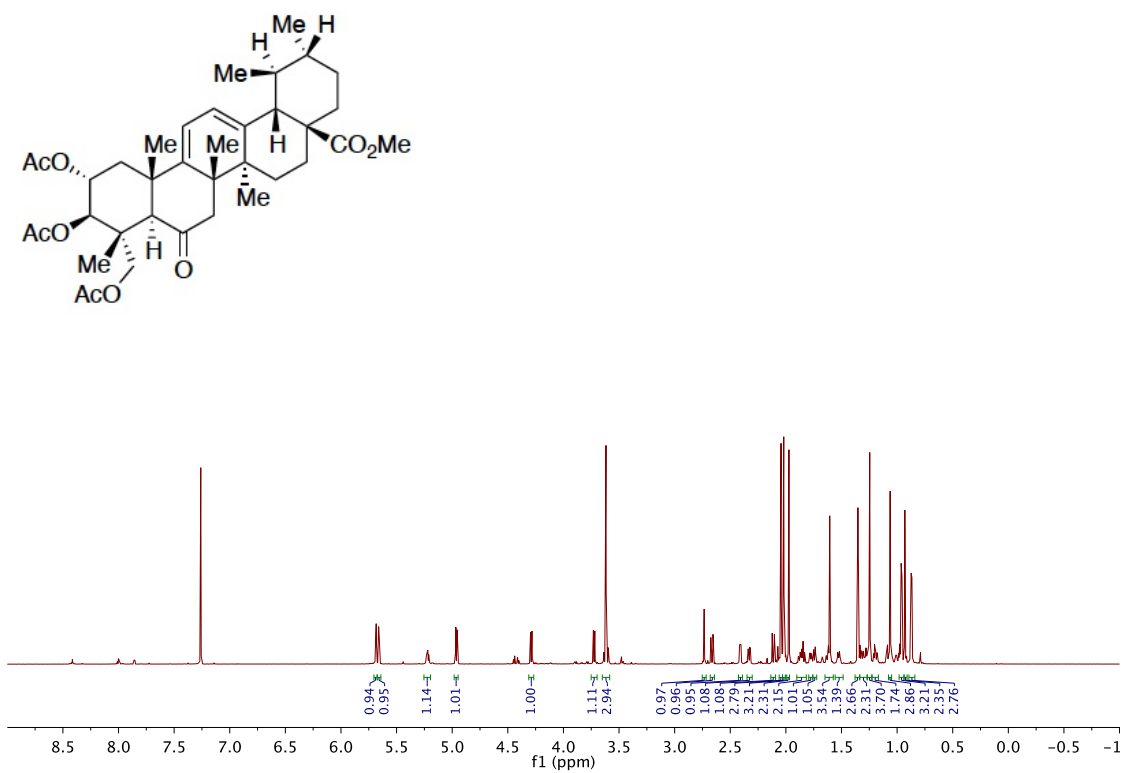

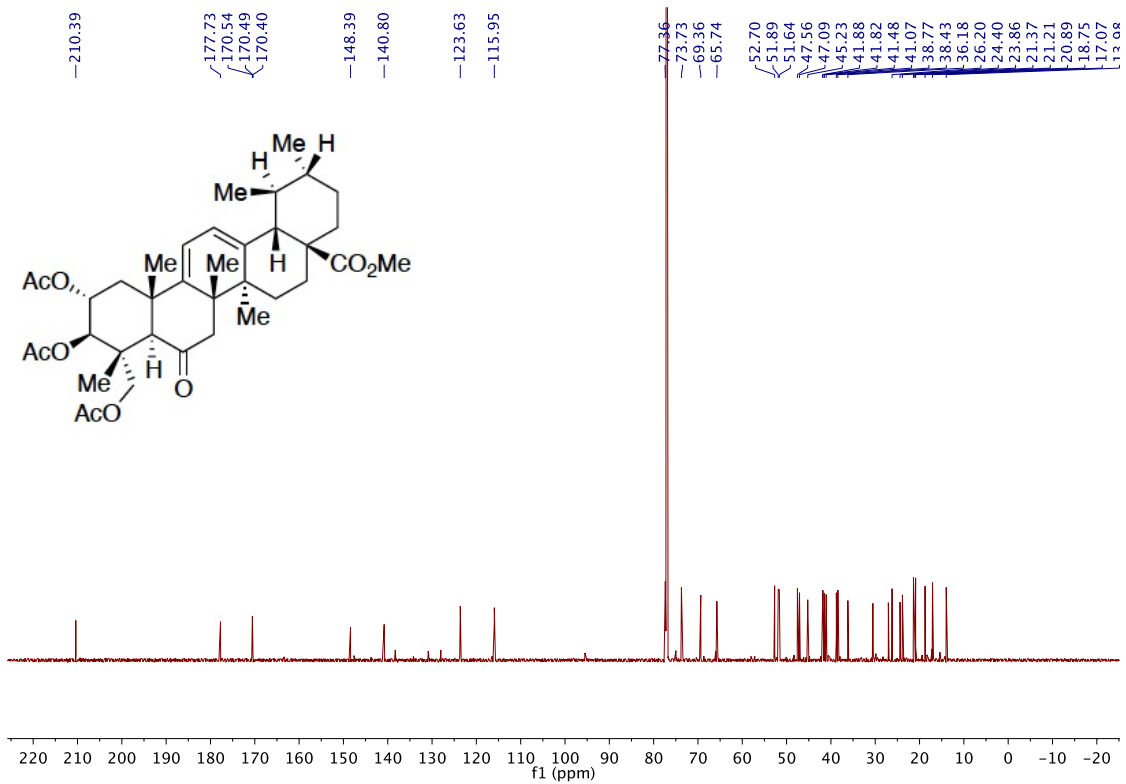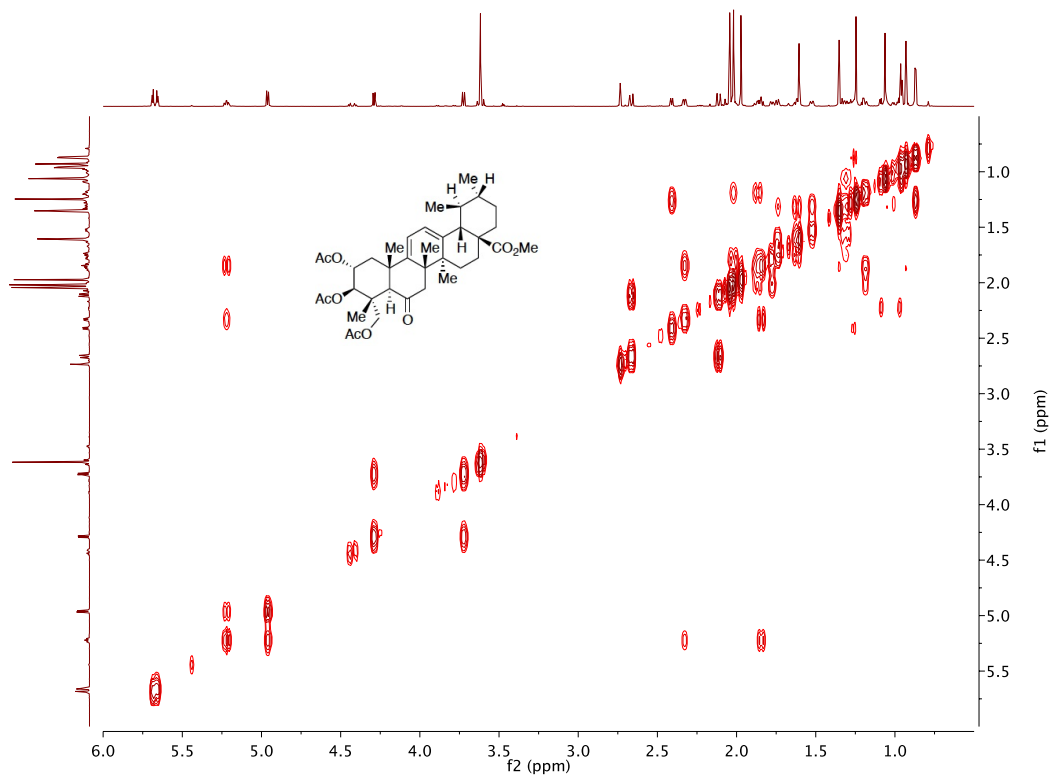

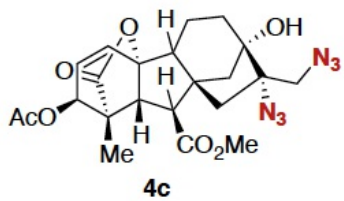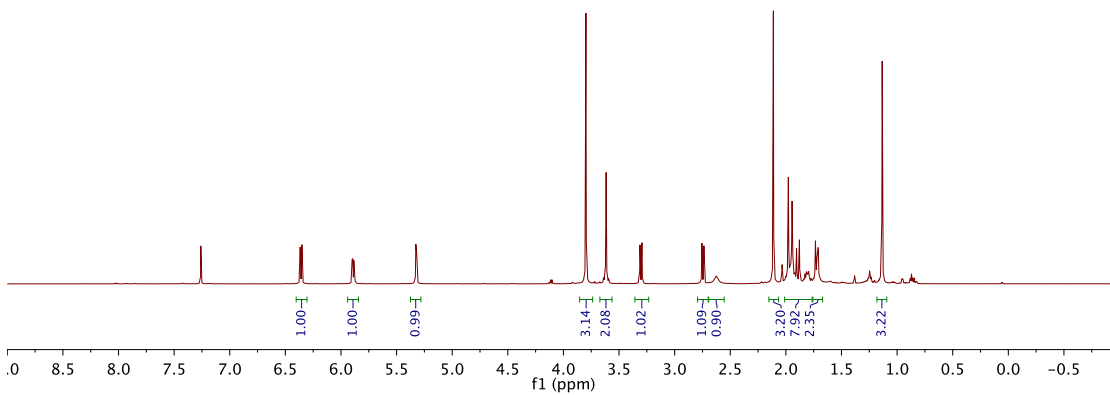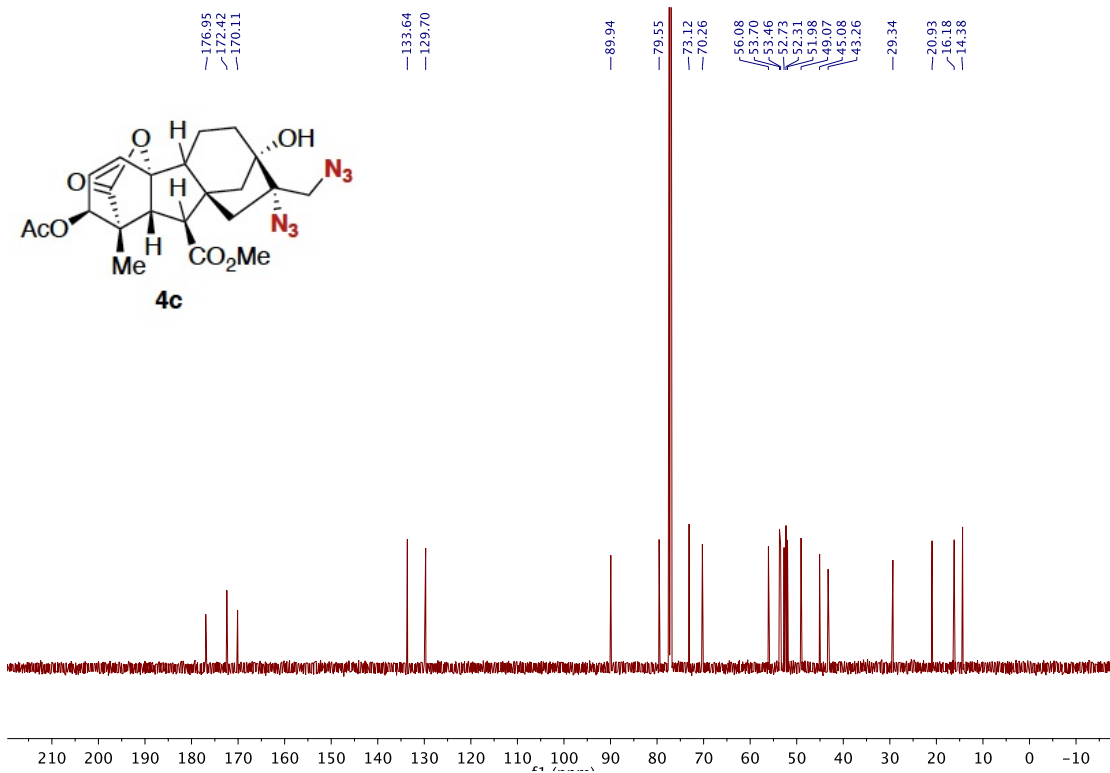

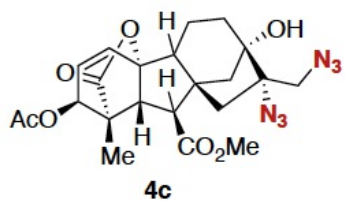

DEPT135 NMR spectrum of azide **4c**

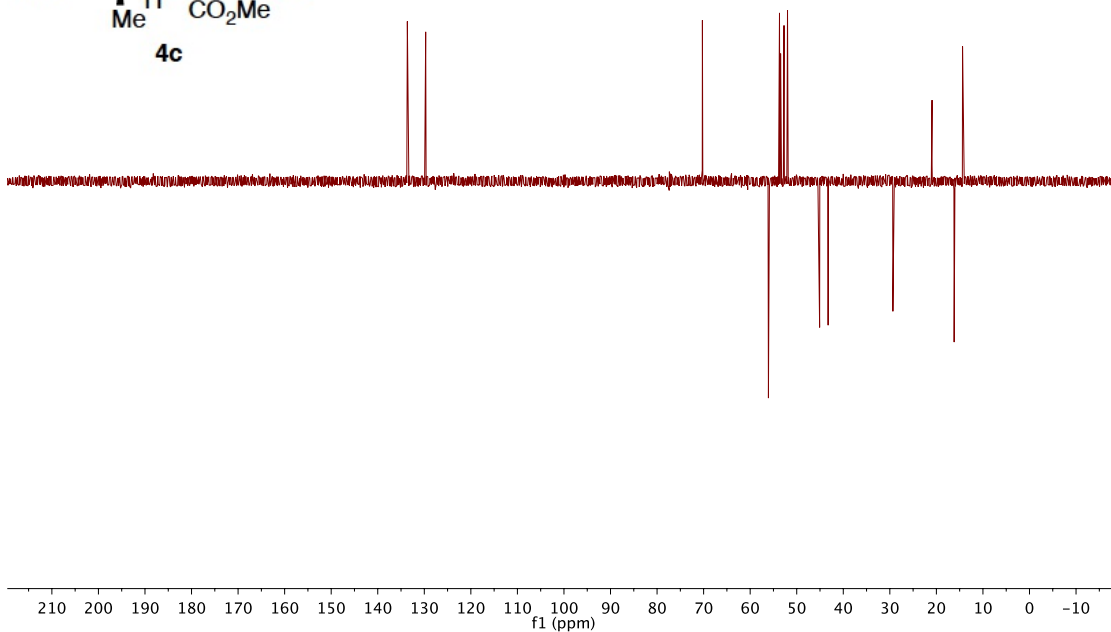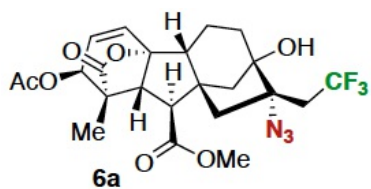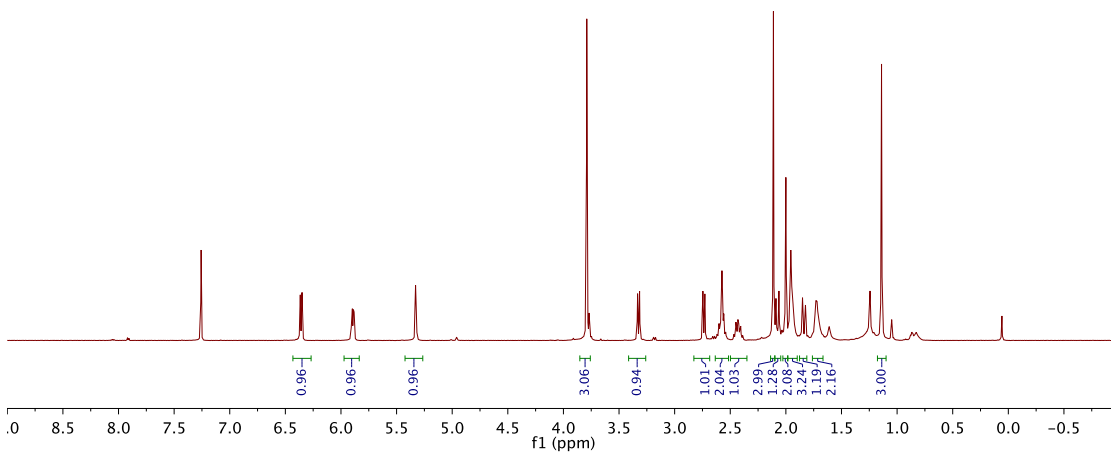

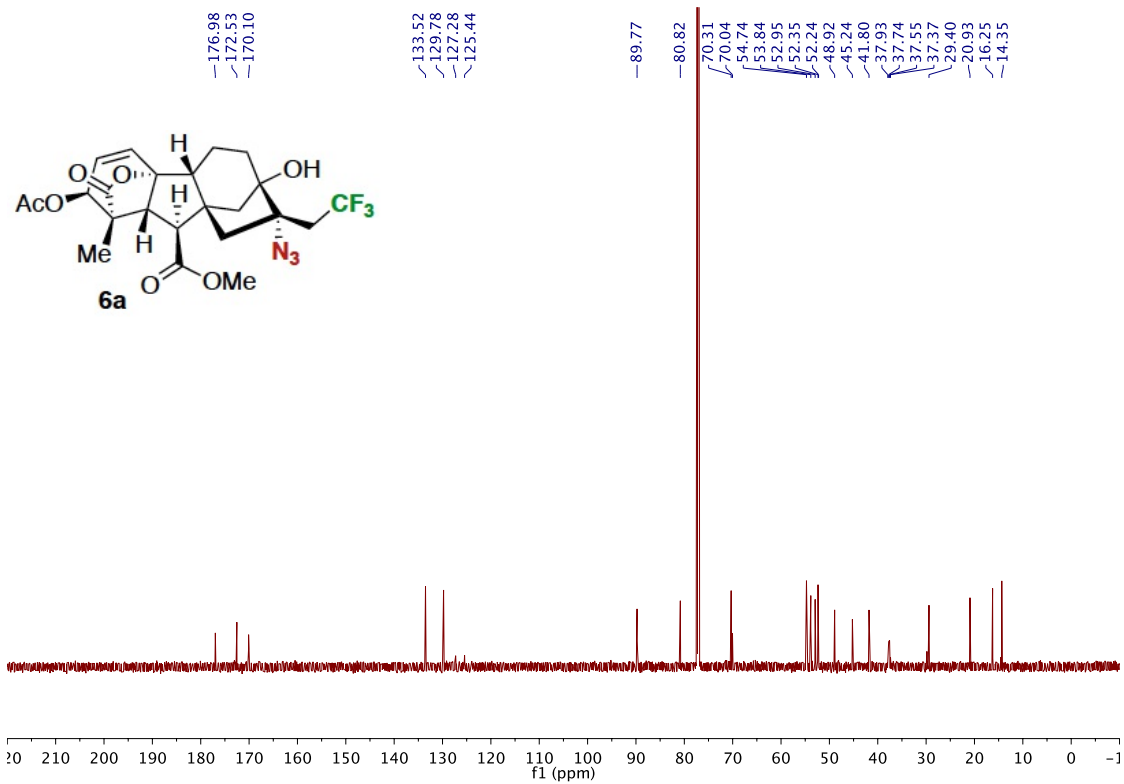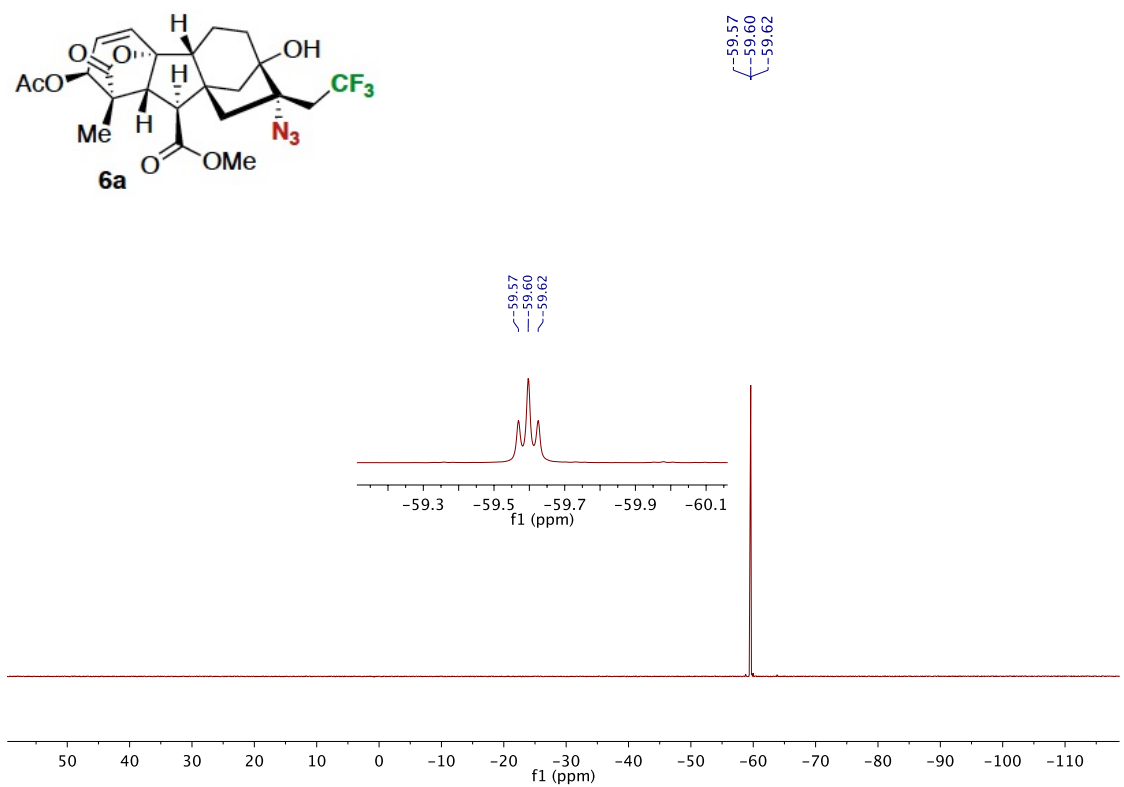

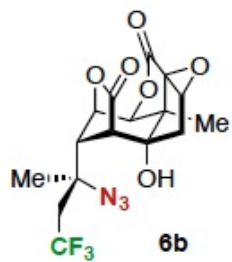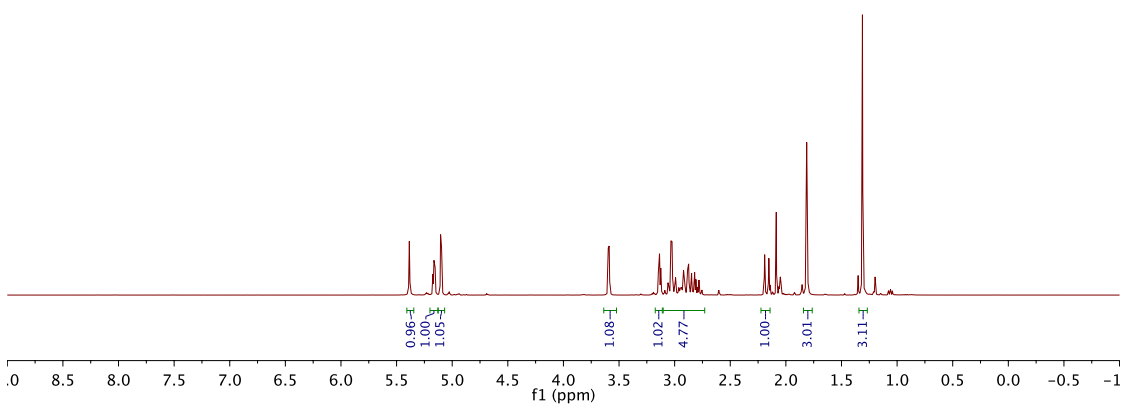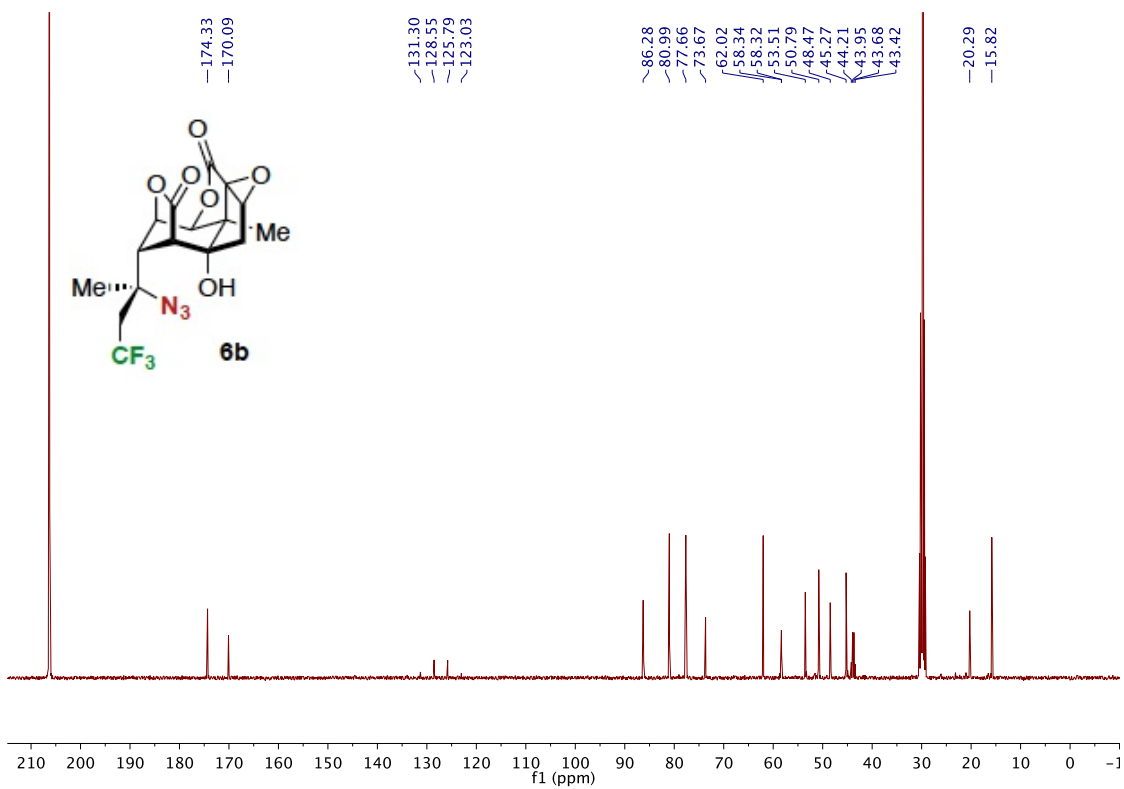



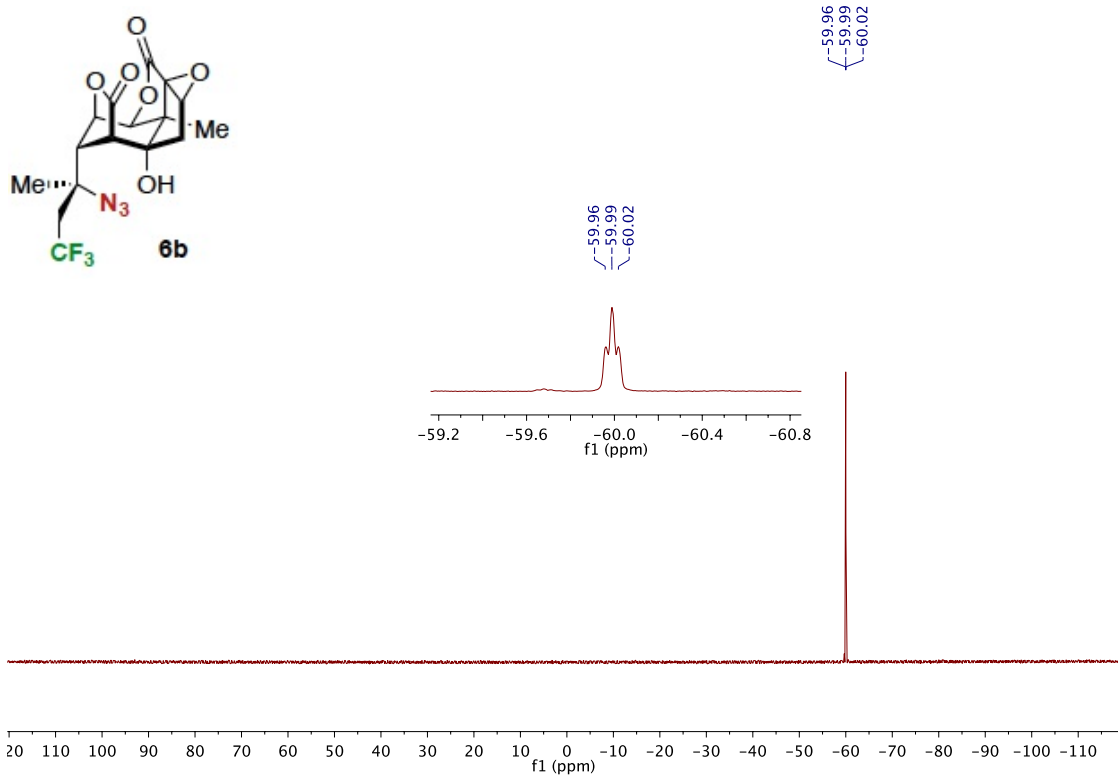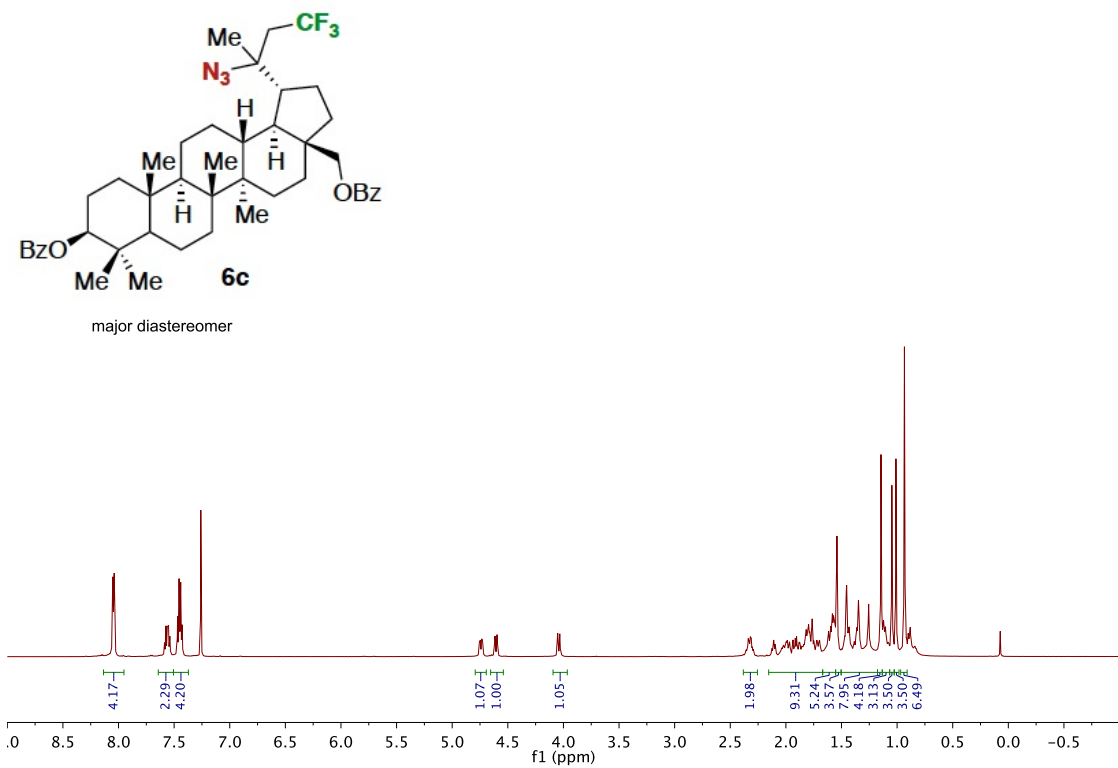

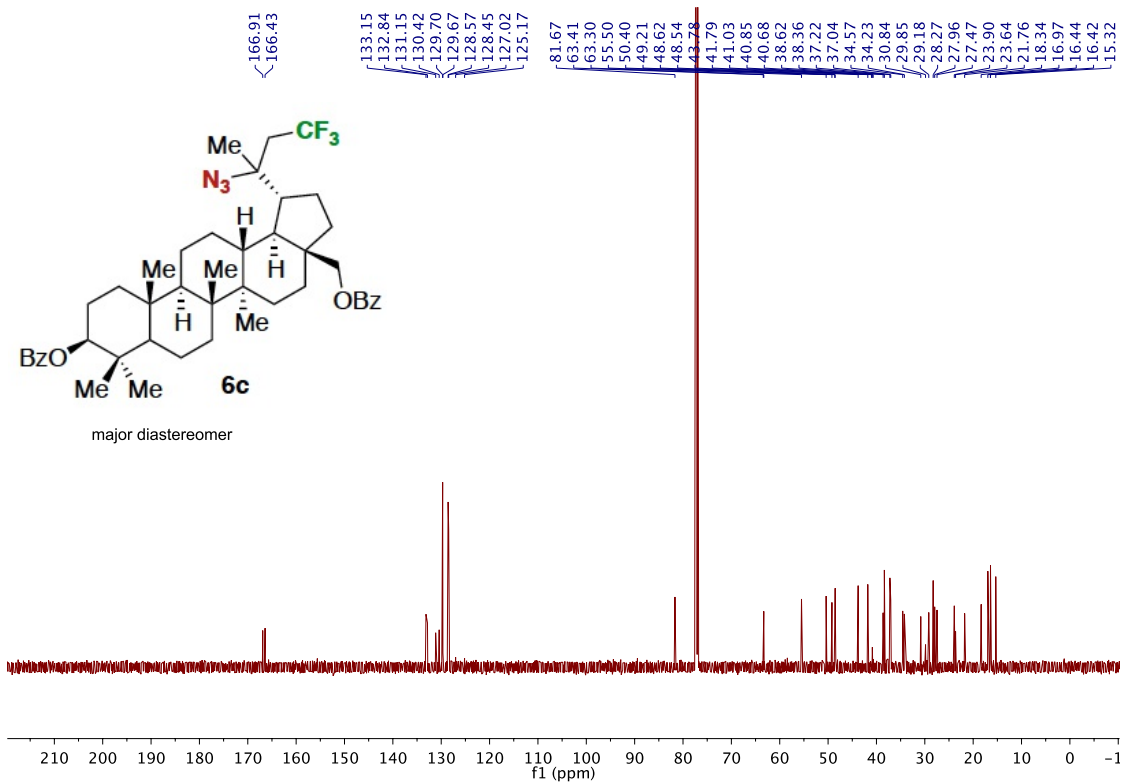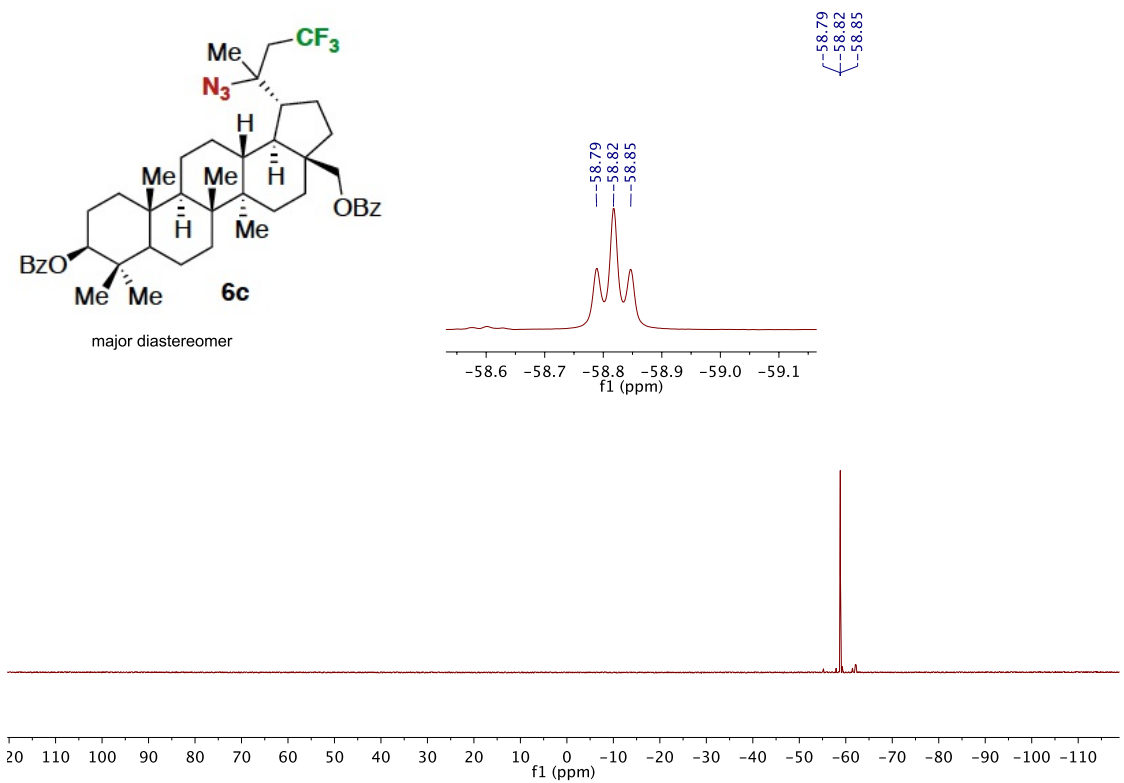

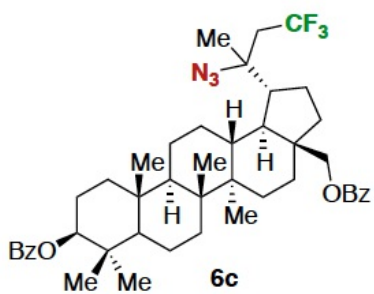

minor diastereomer

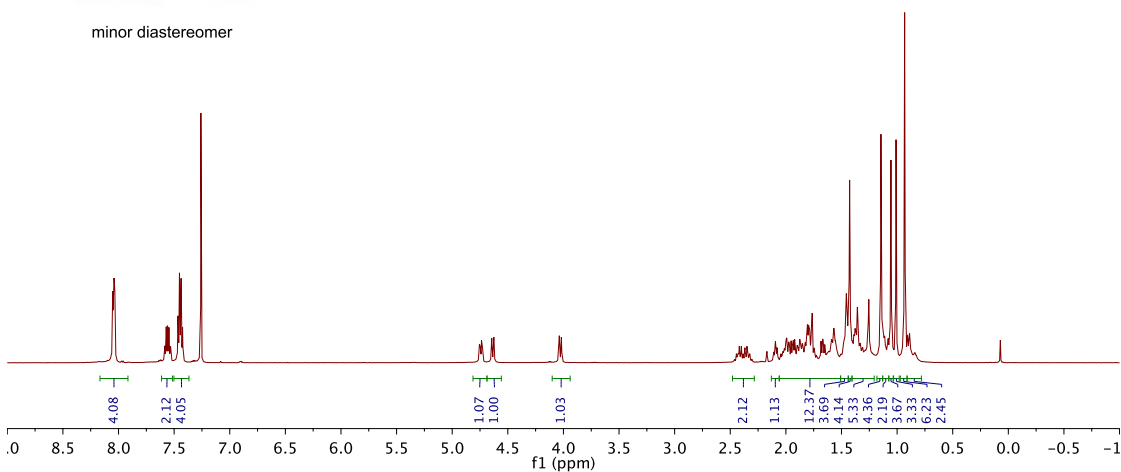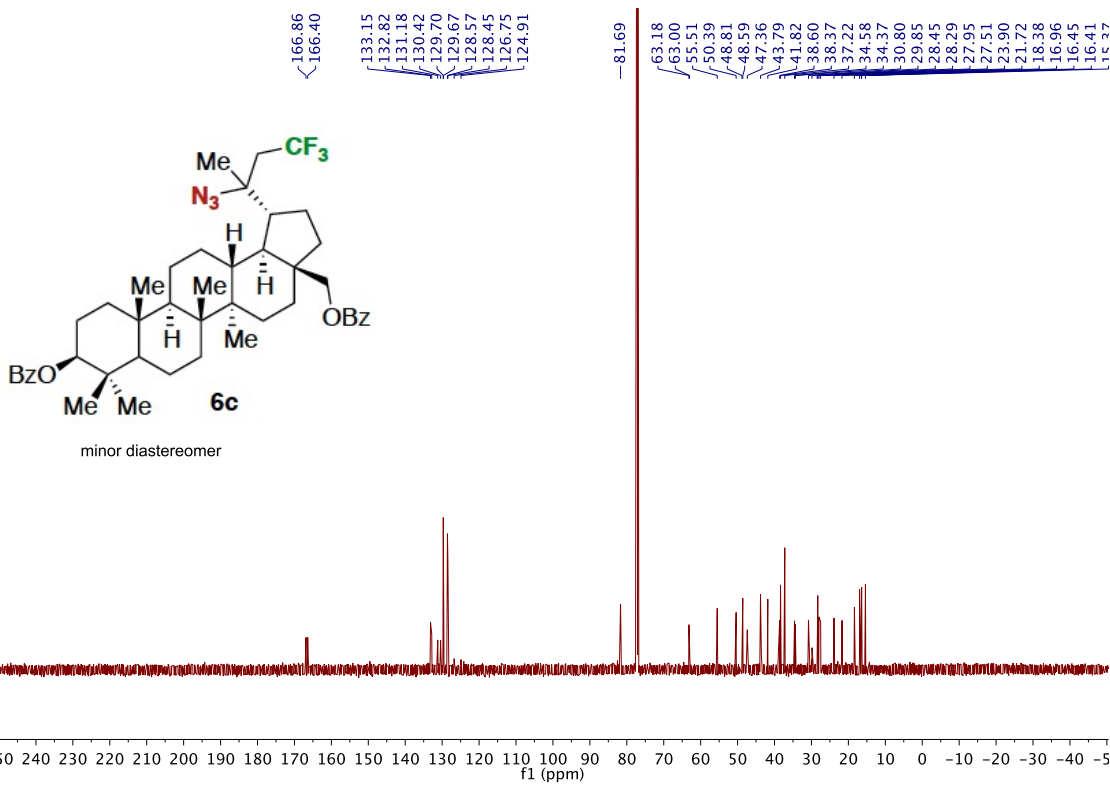



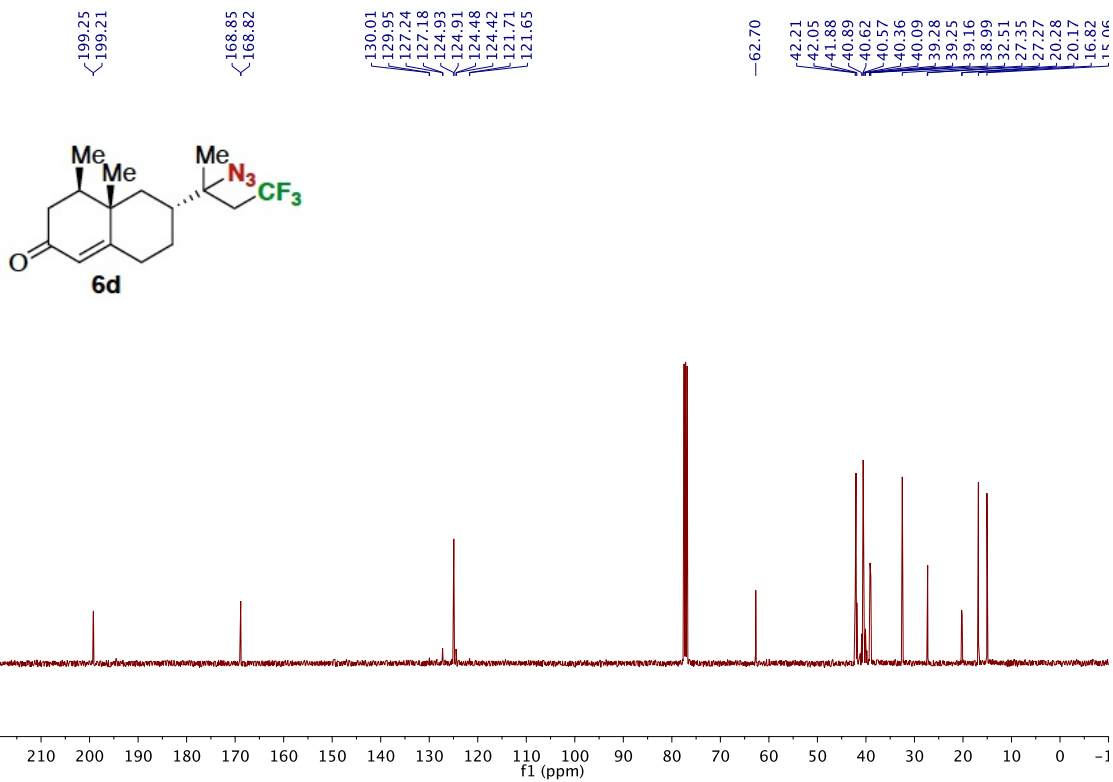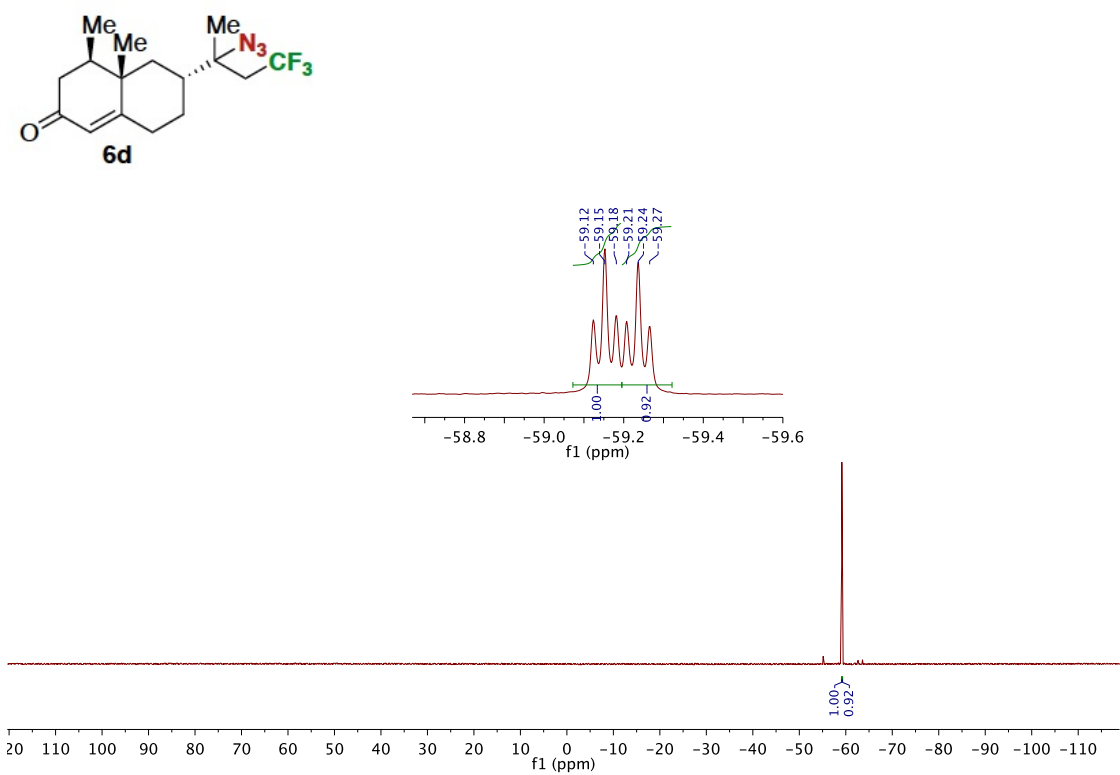

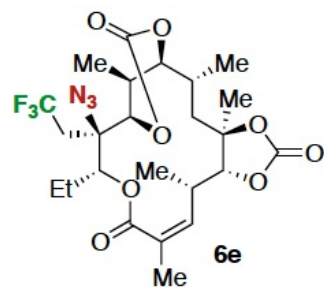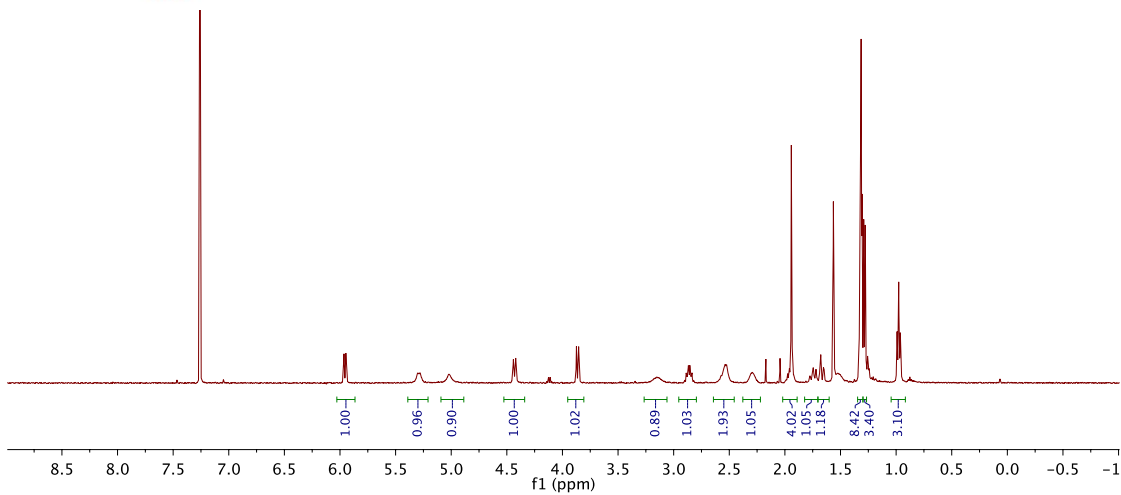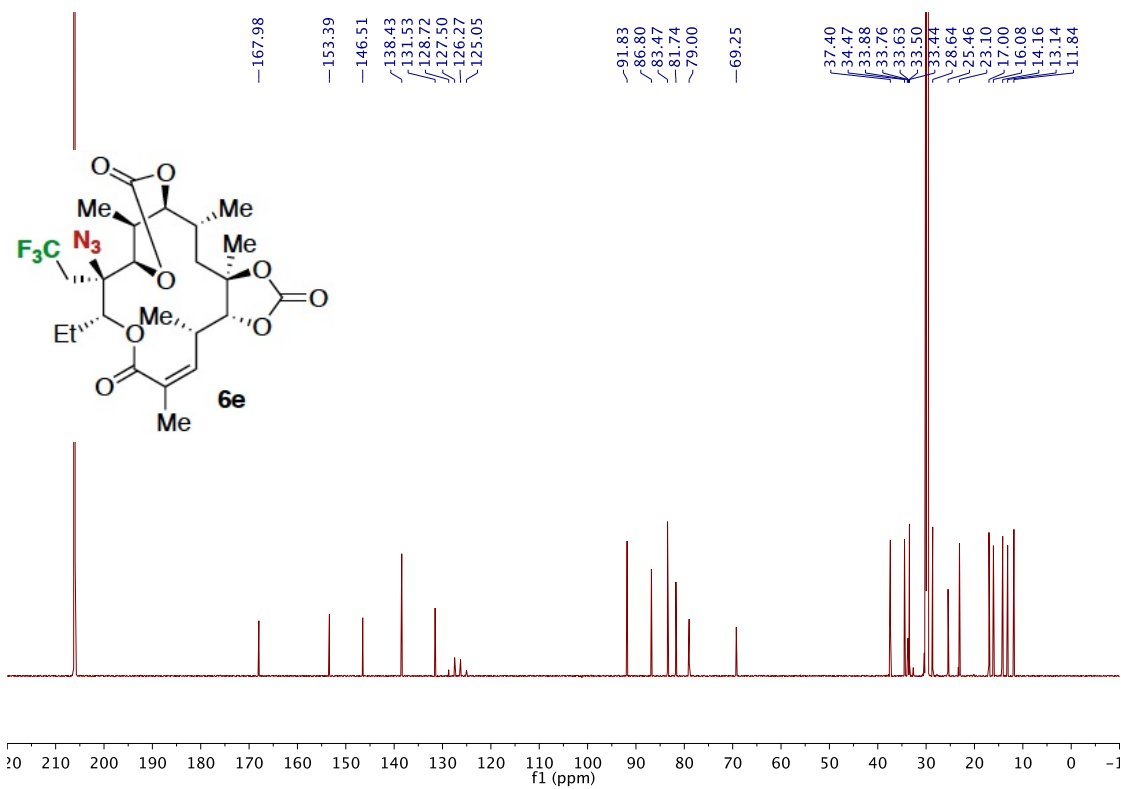

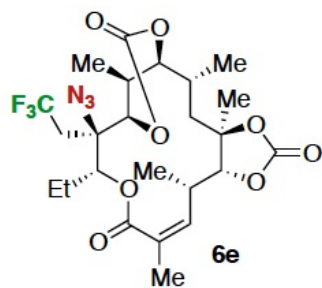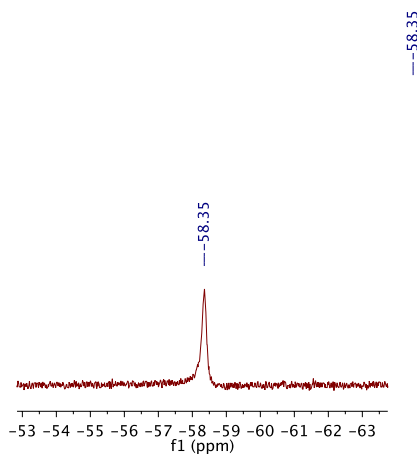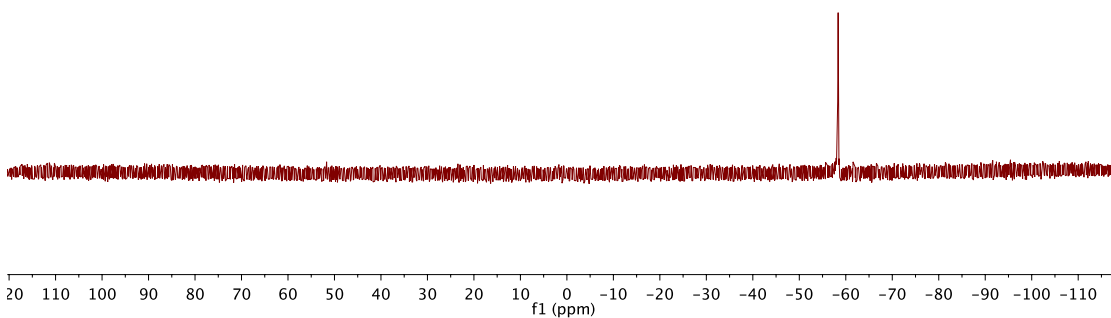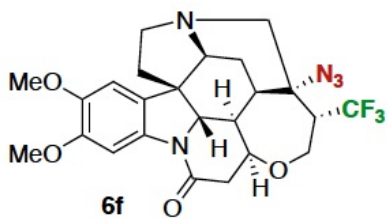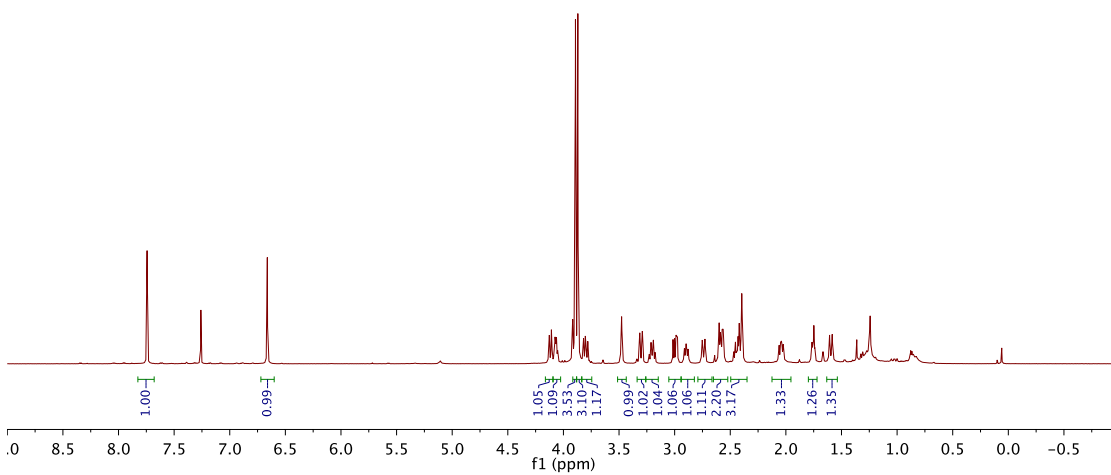

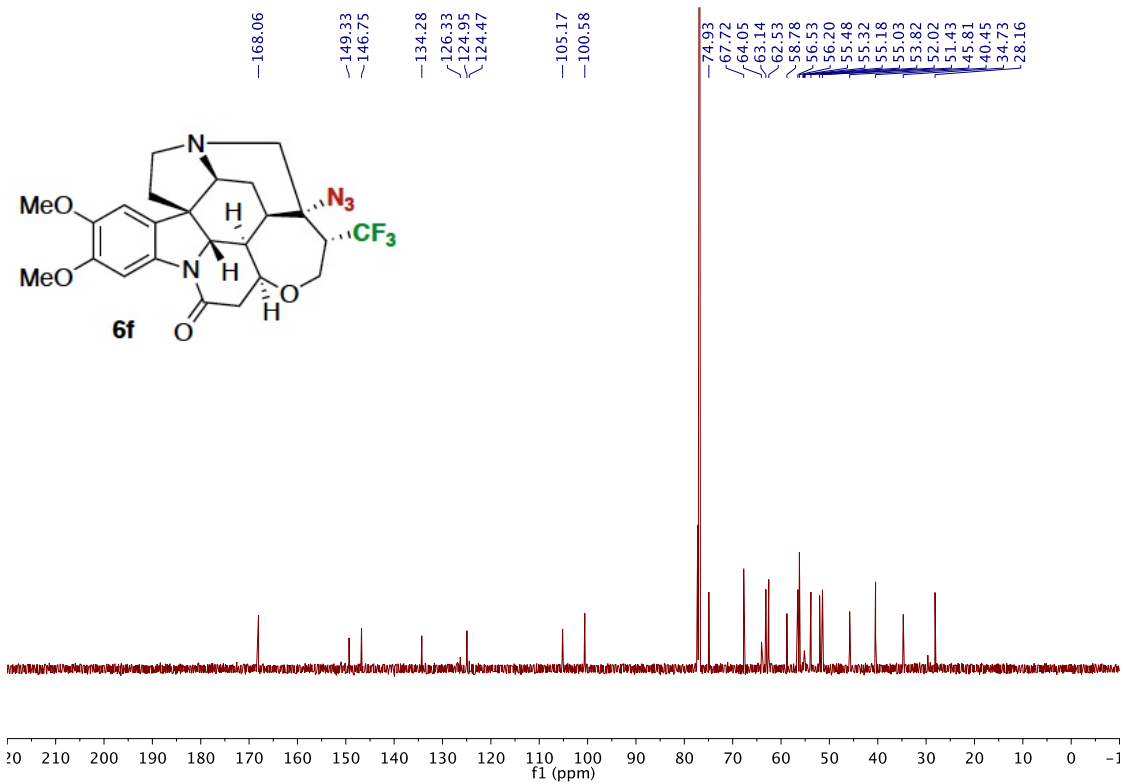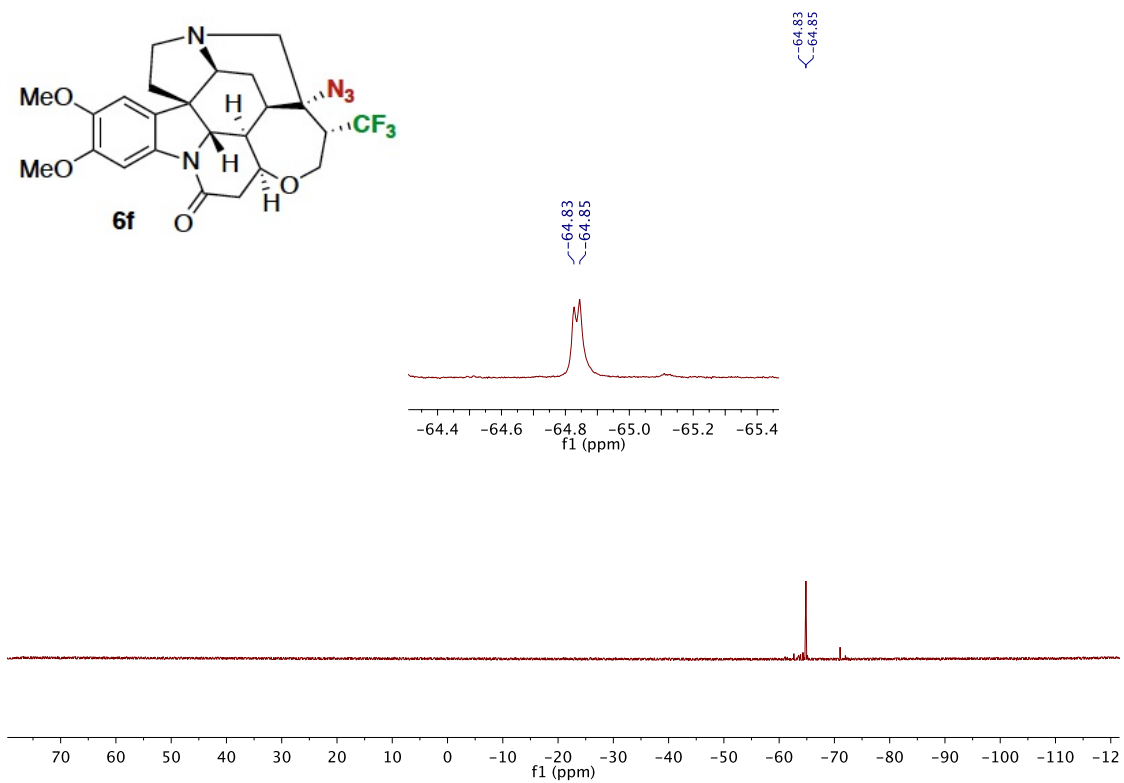



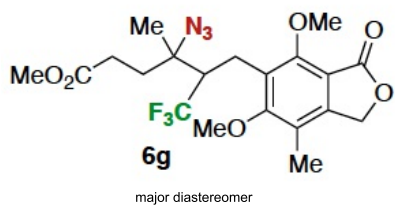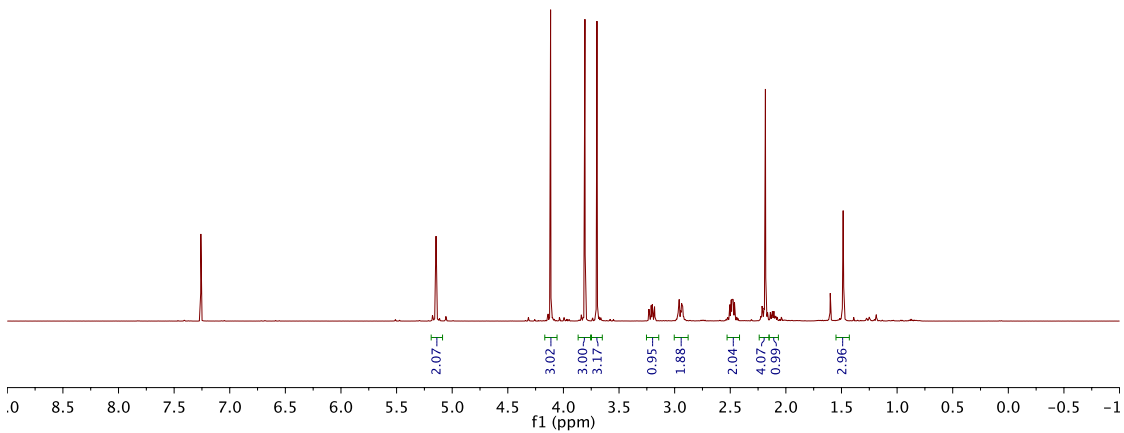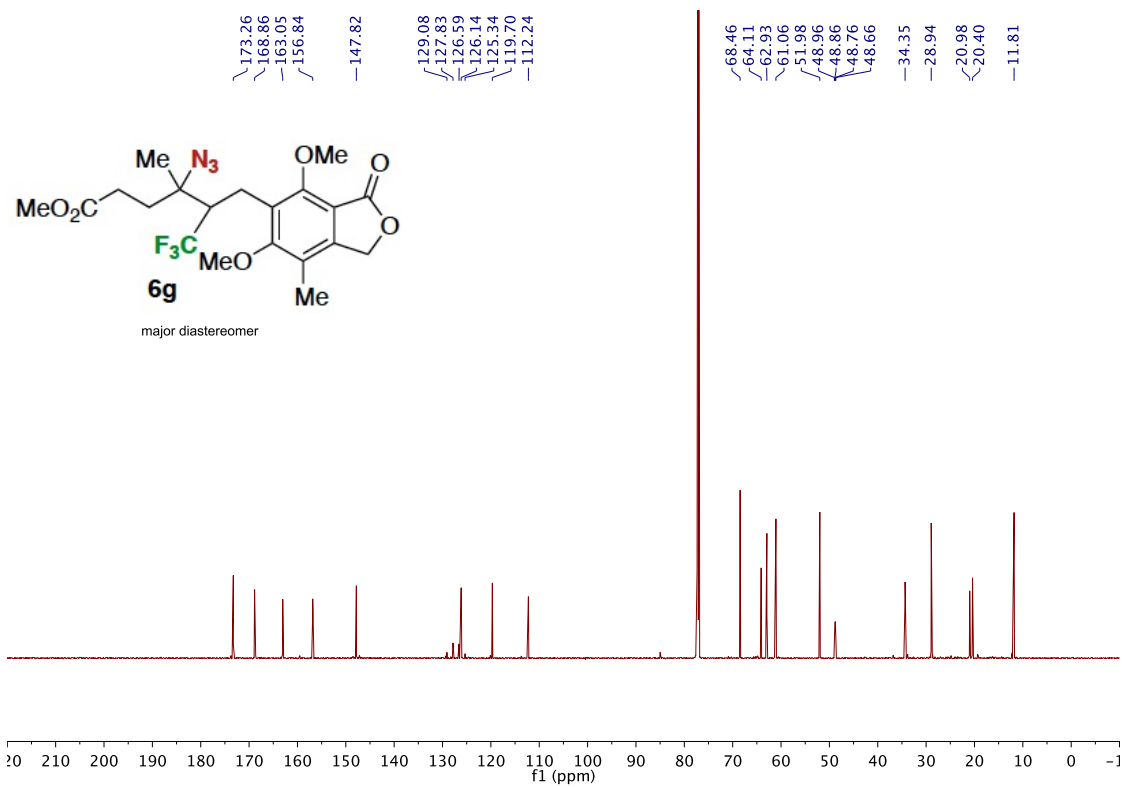

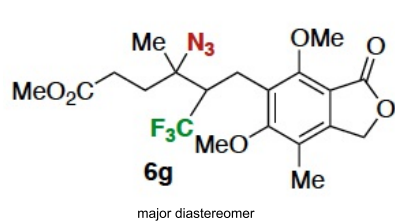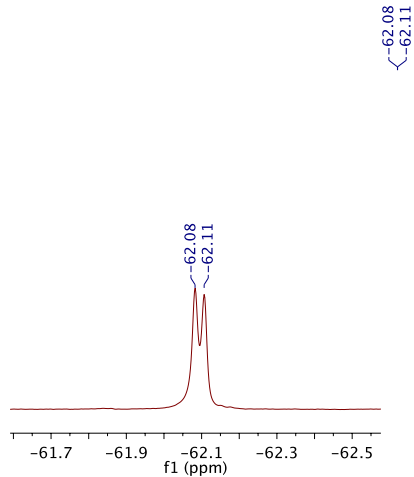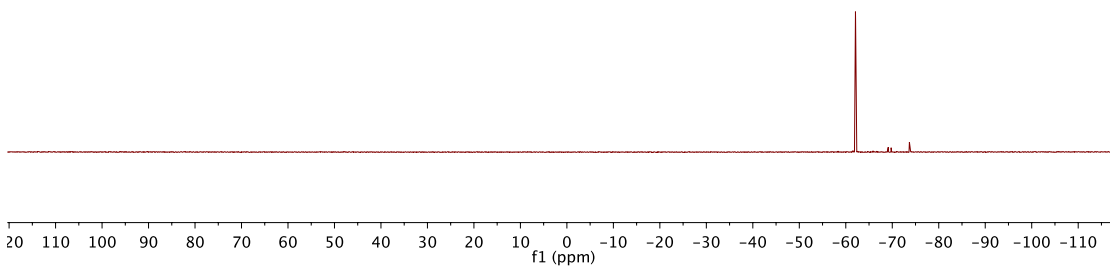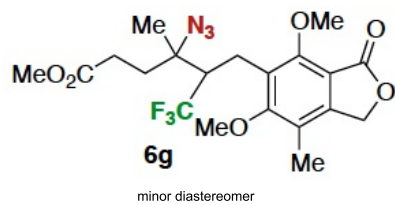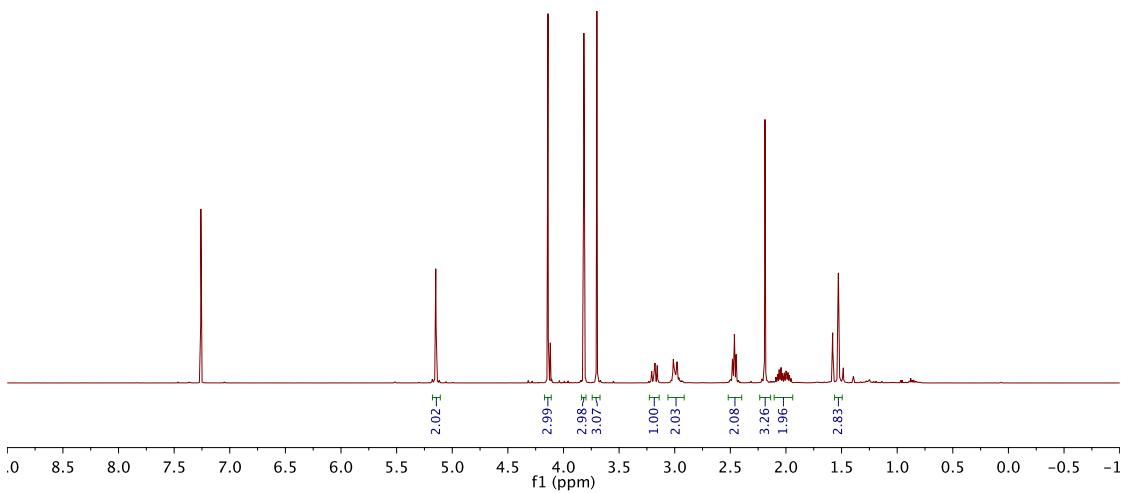

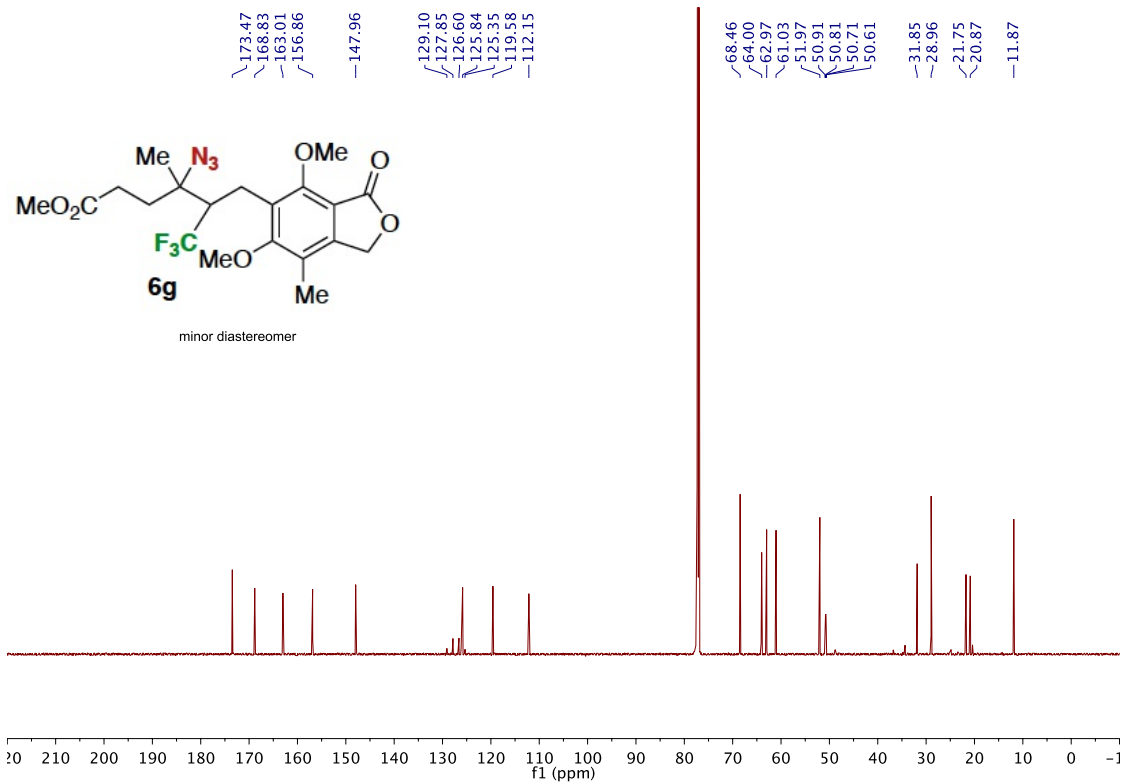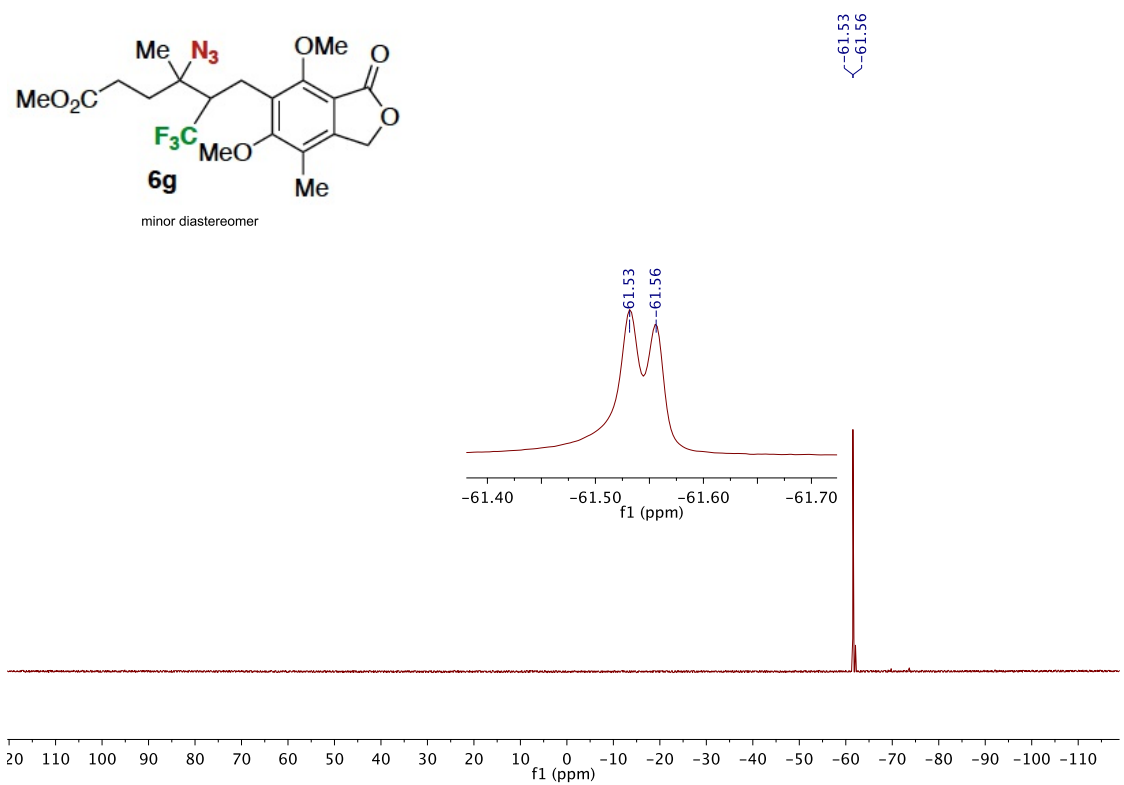

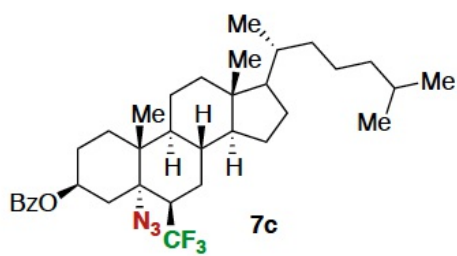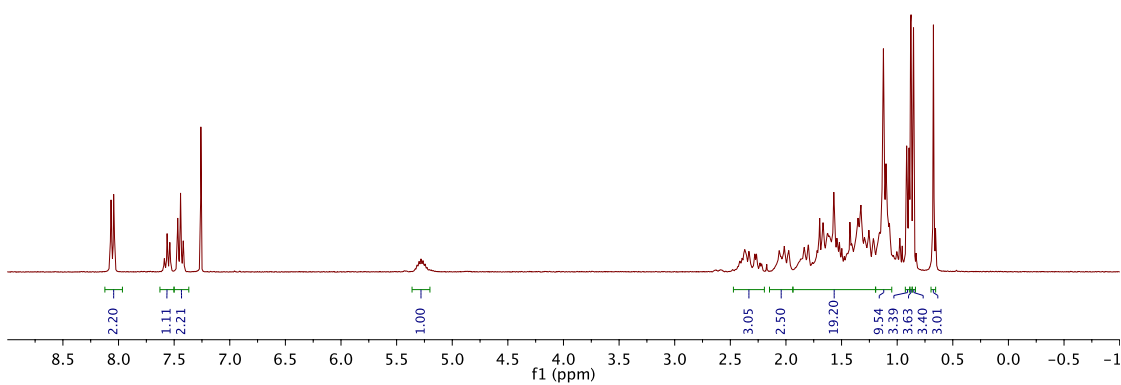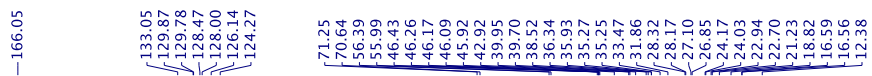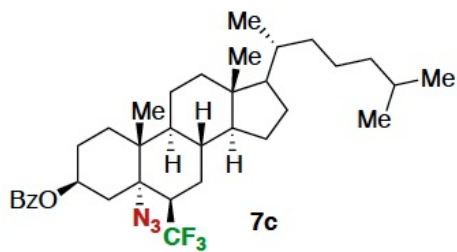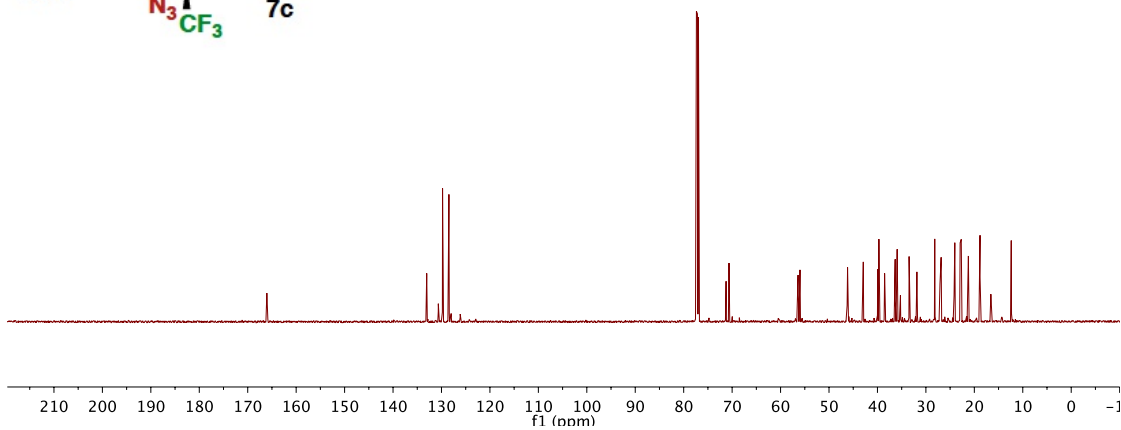

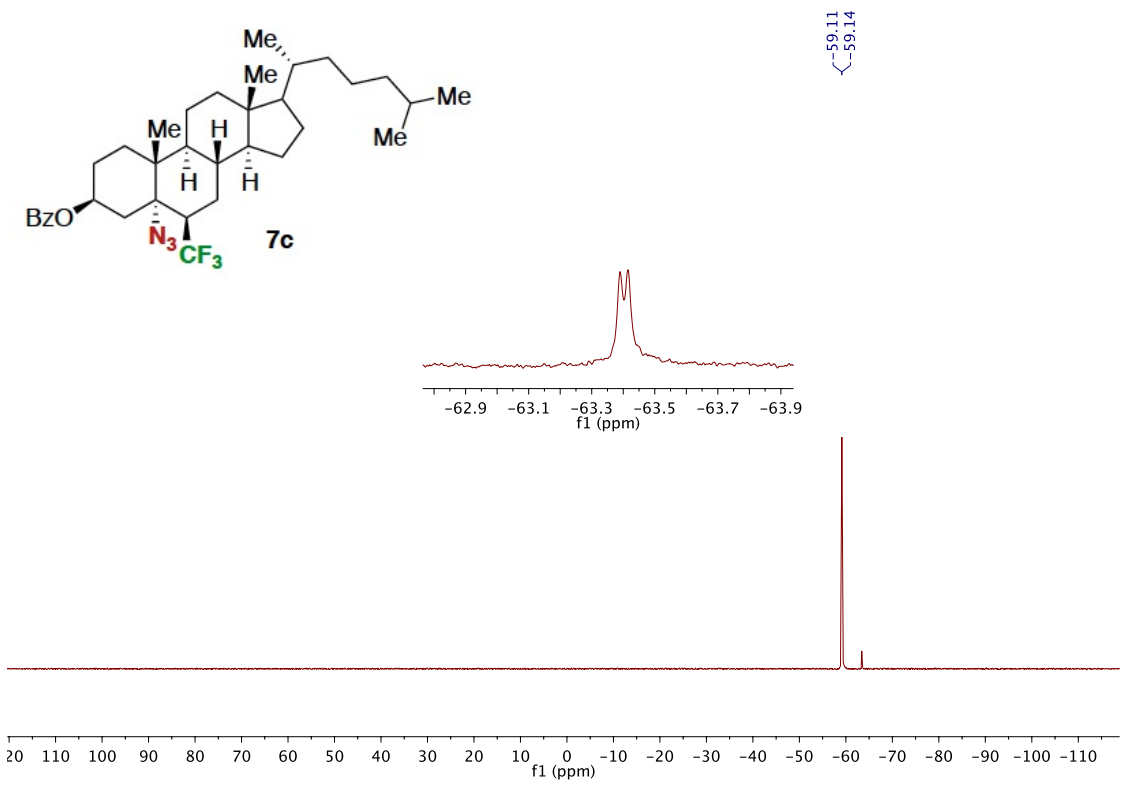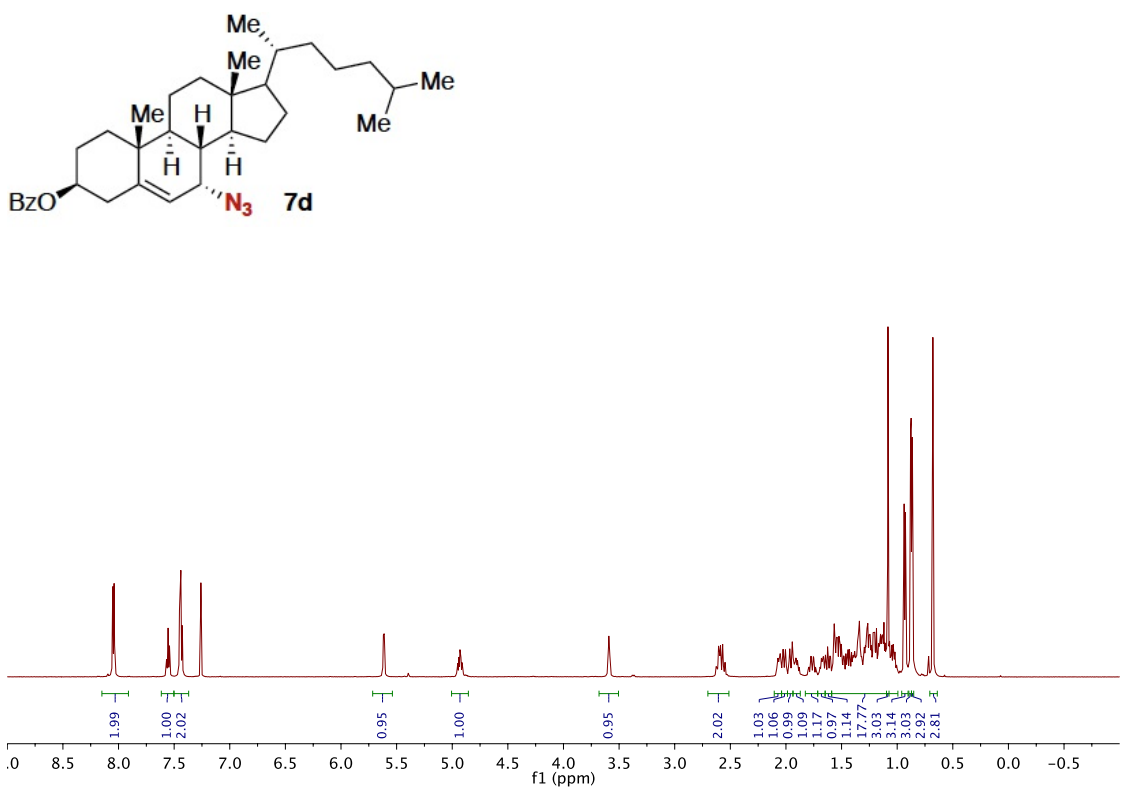

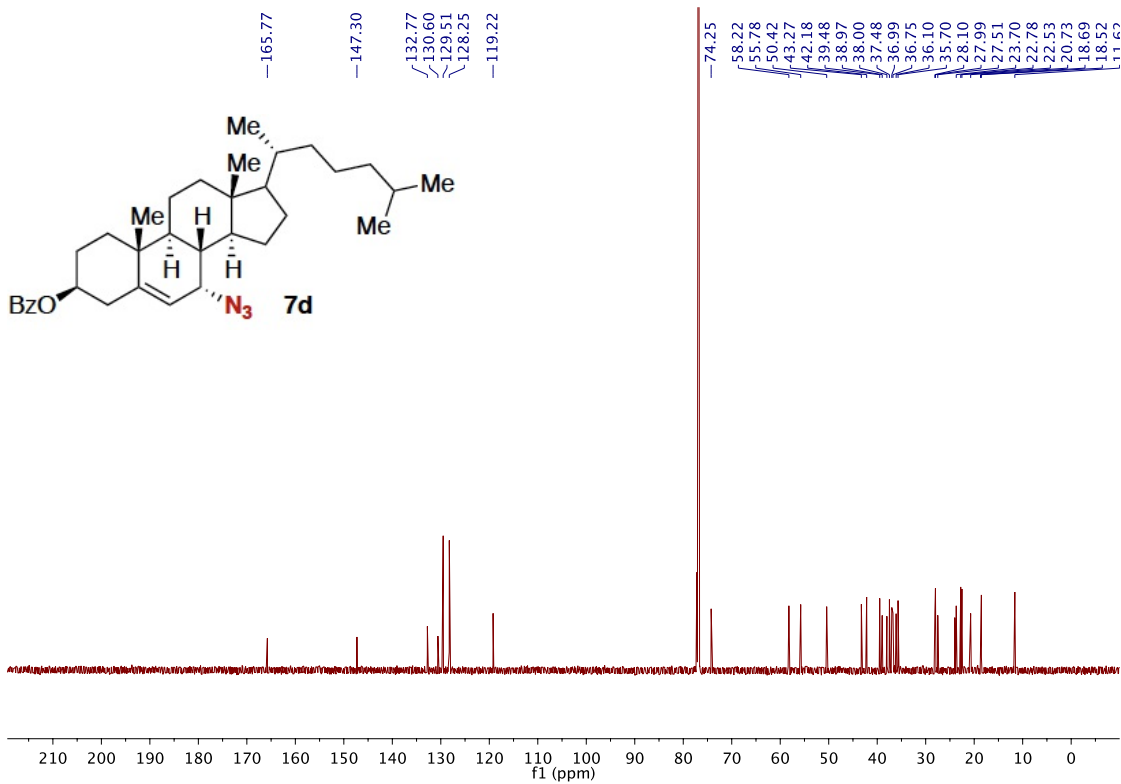

DEPT135 NMR spectrum of azide **7d**

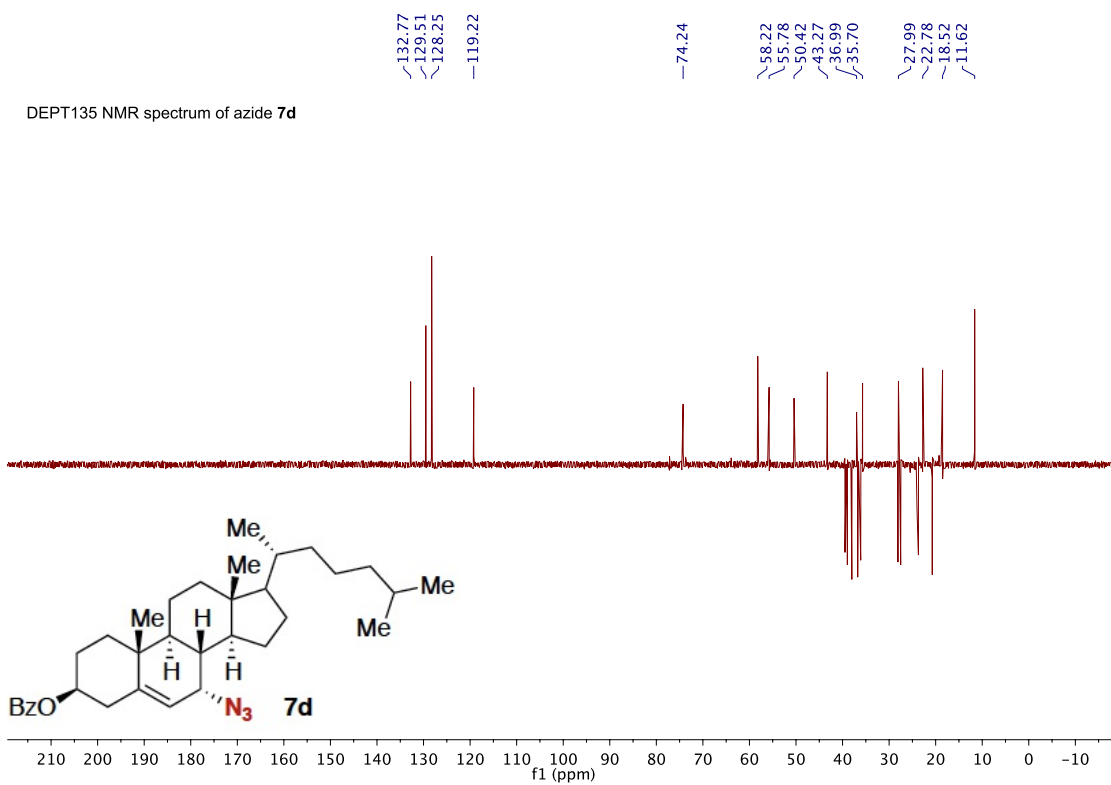

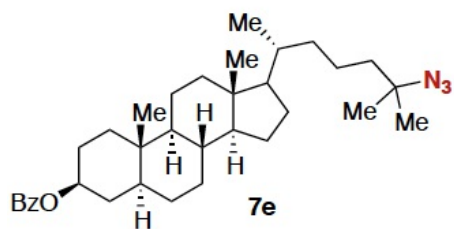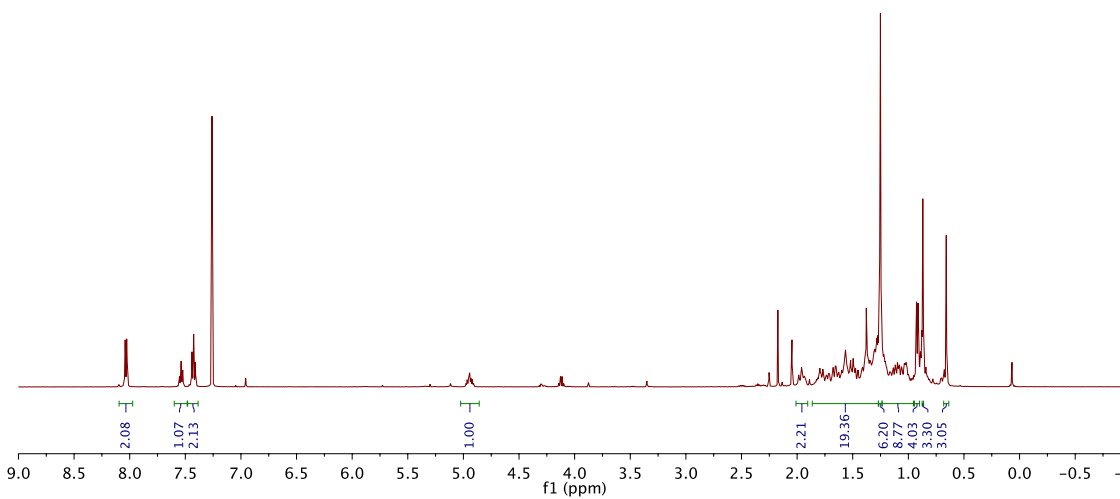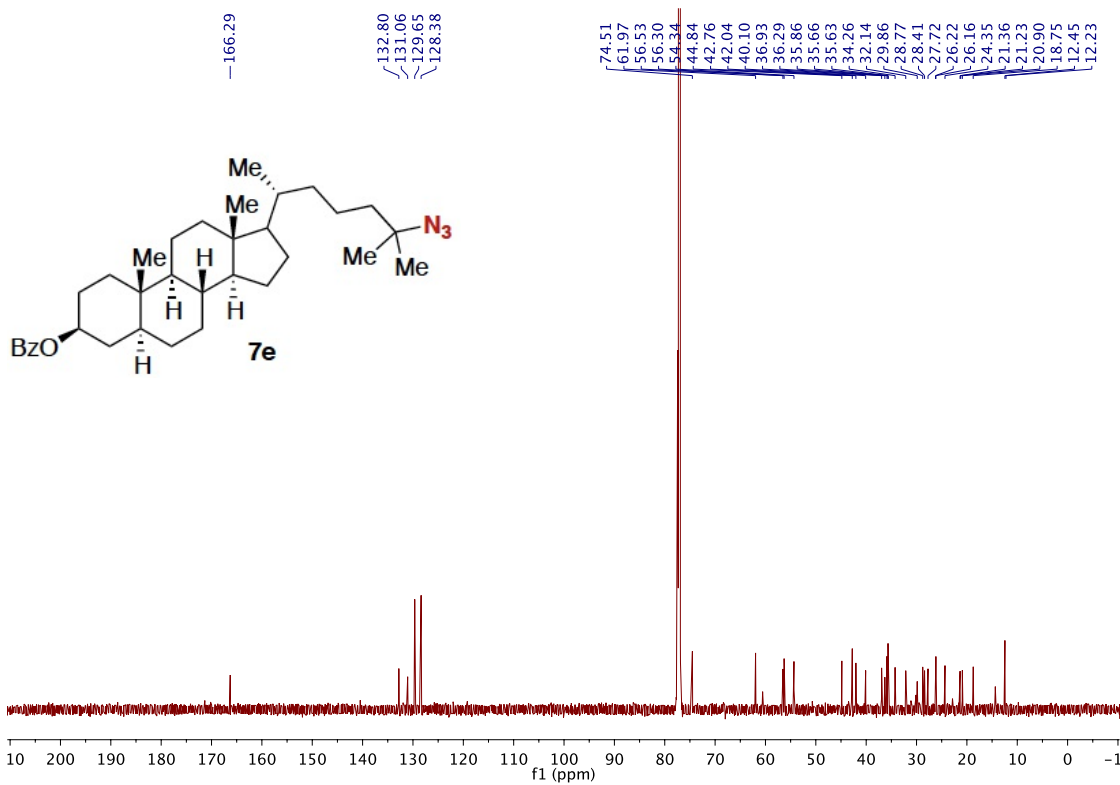

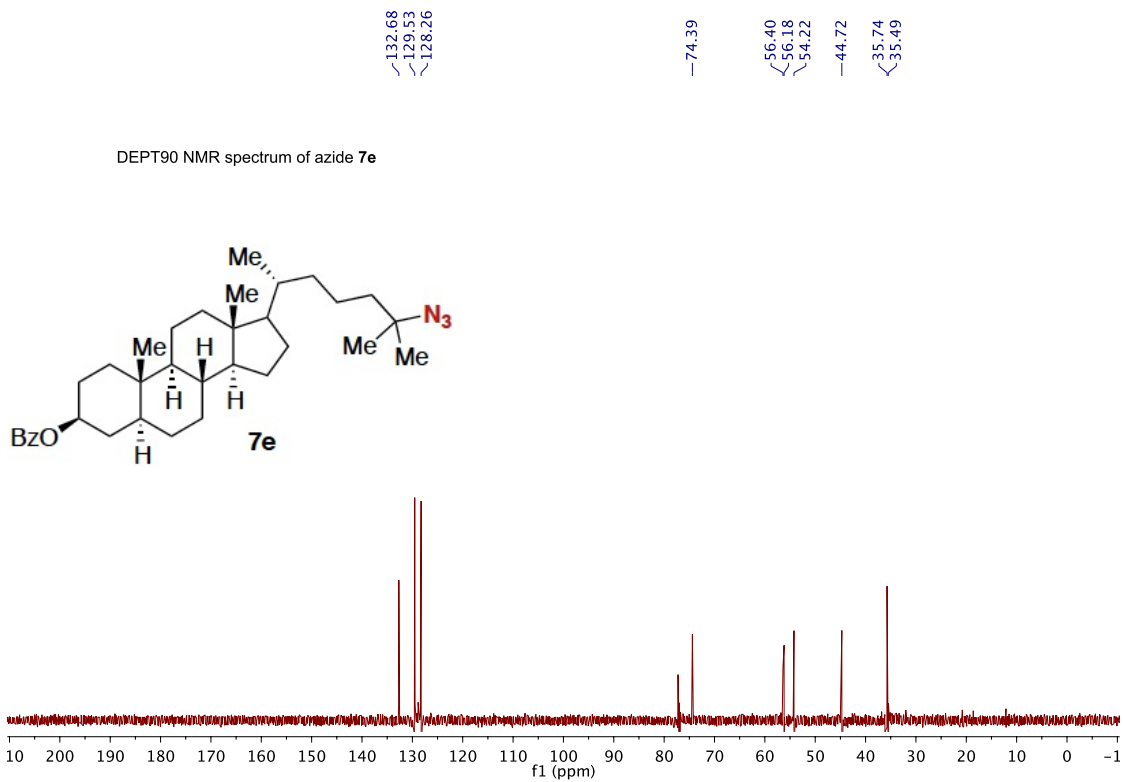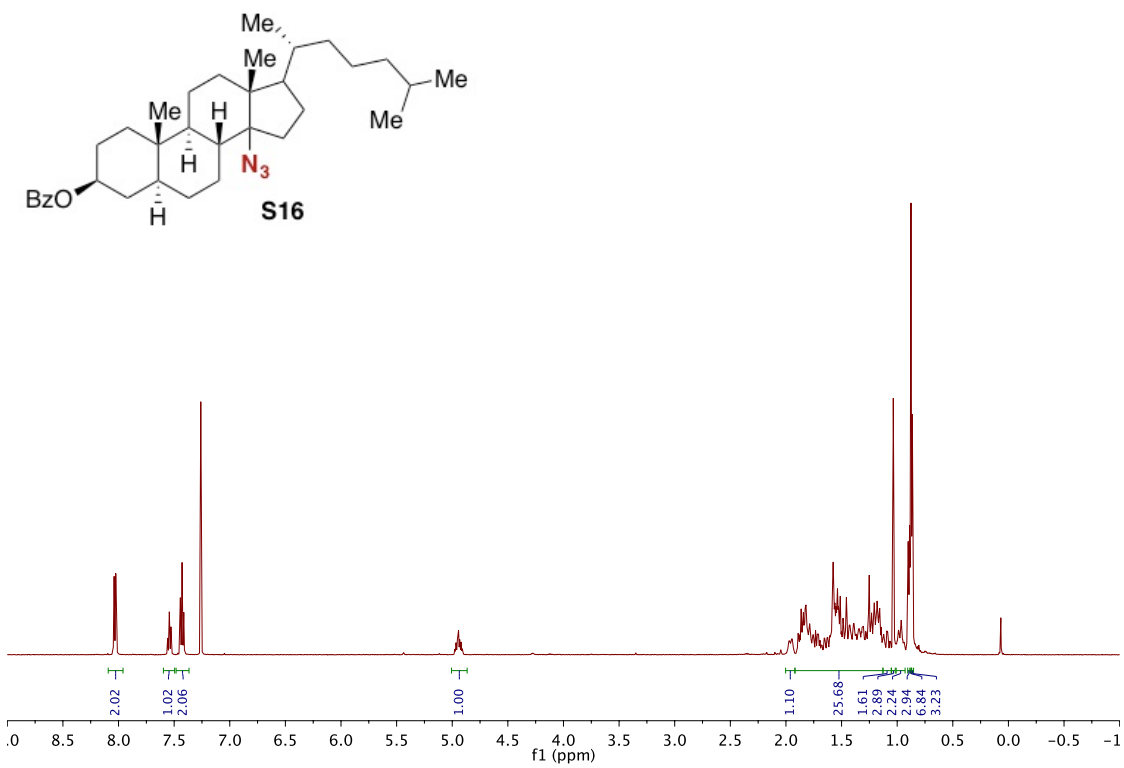



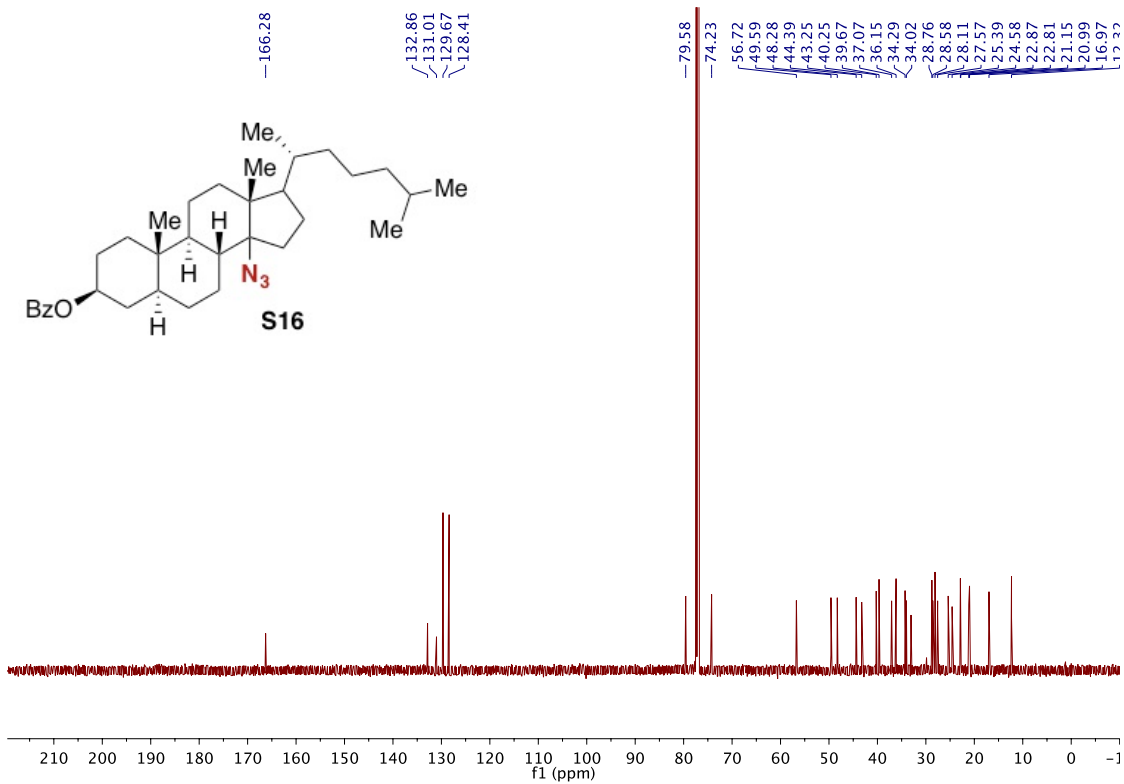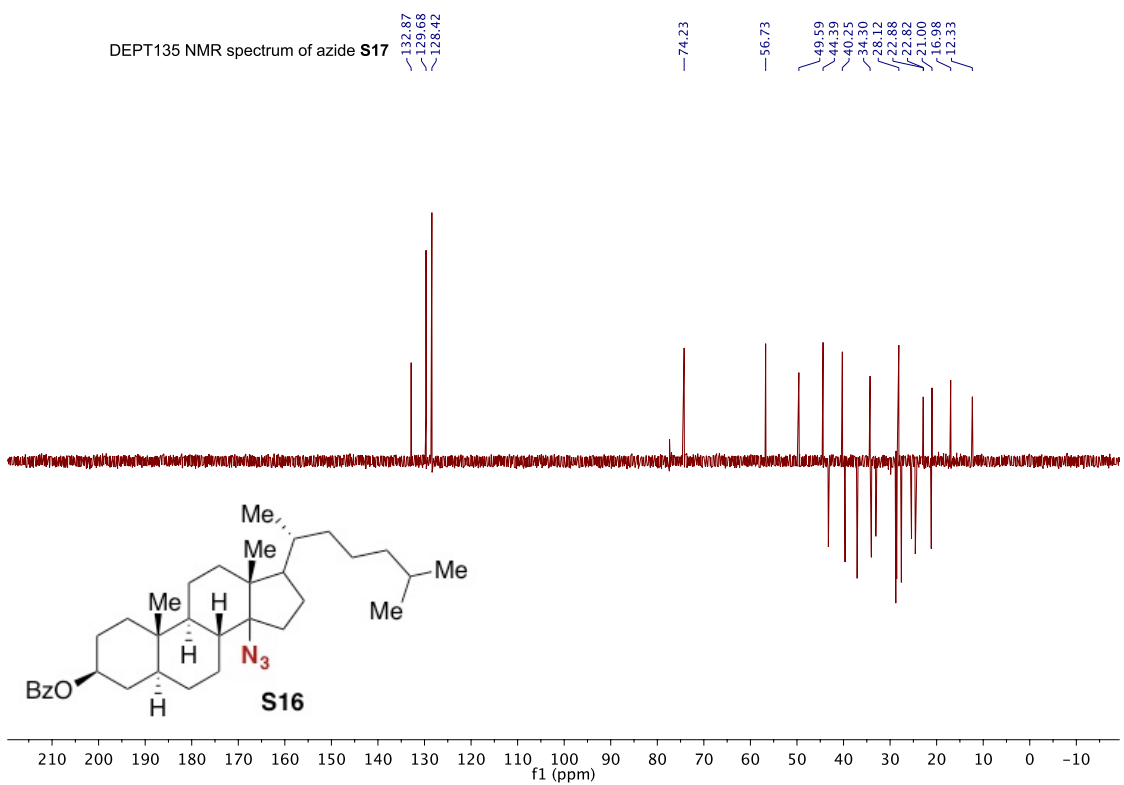

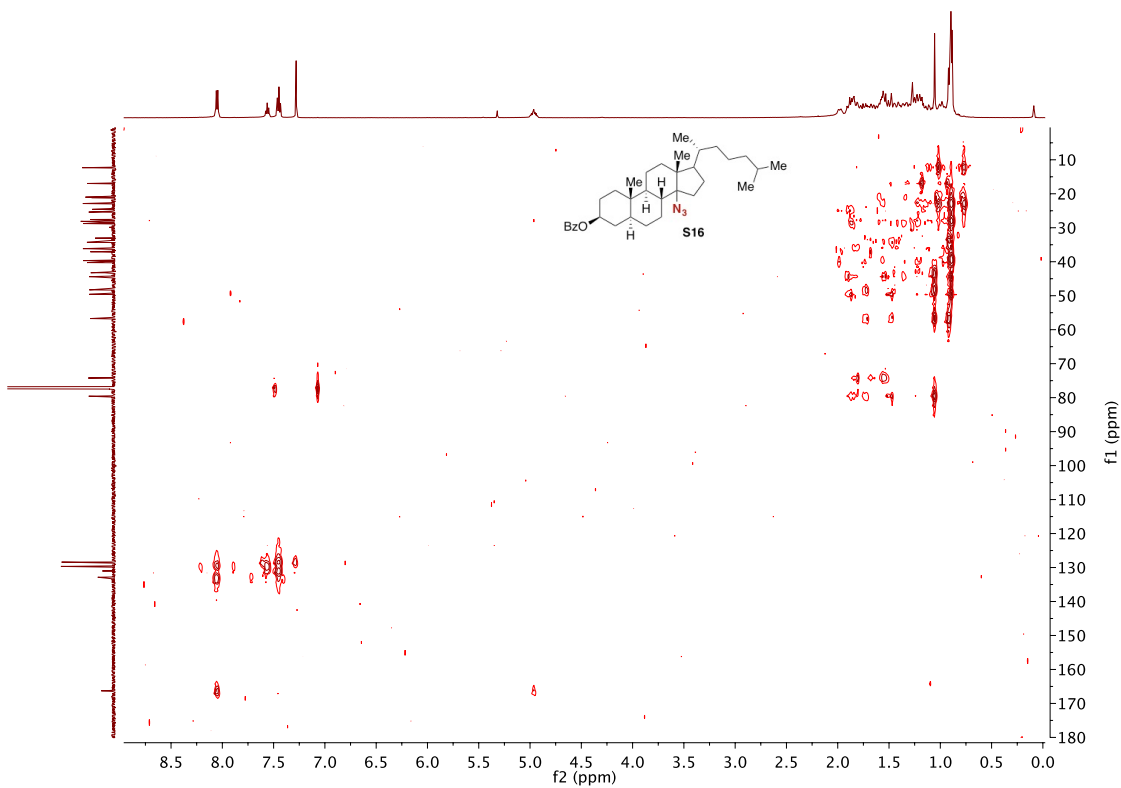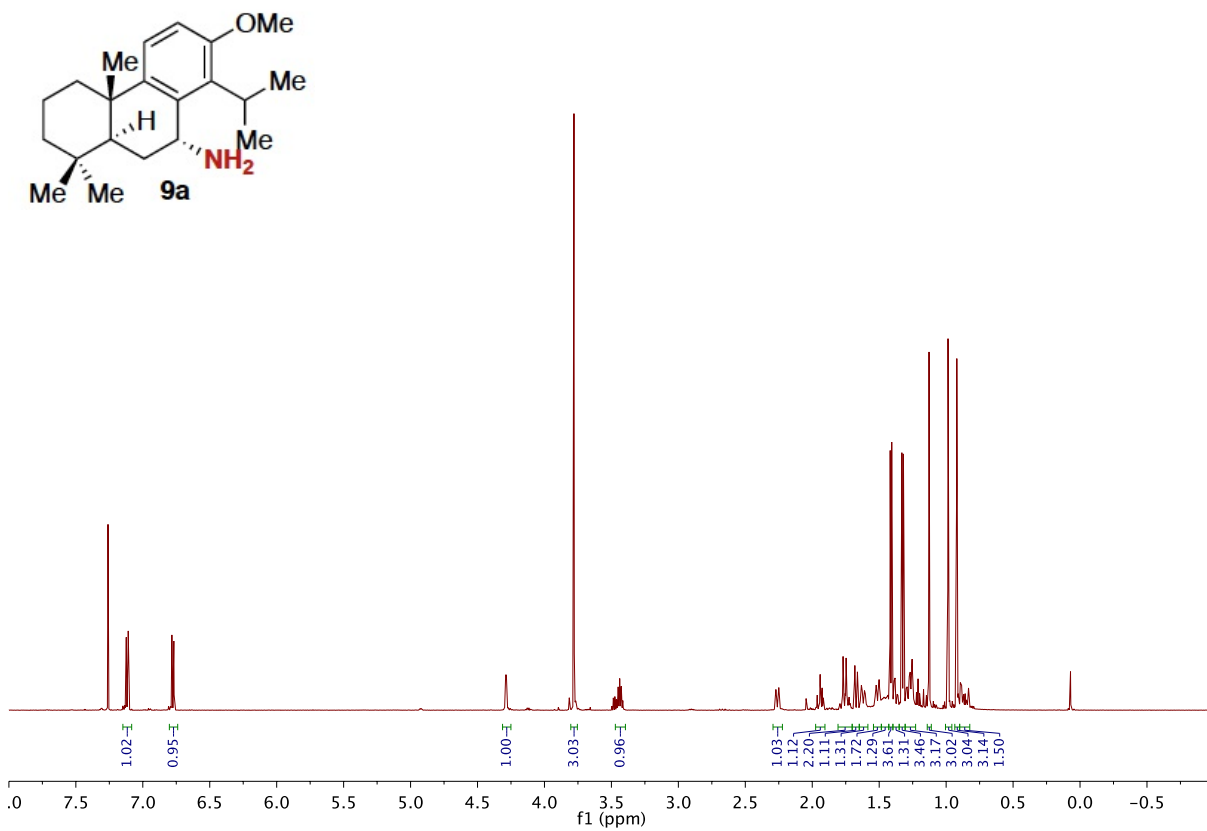

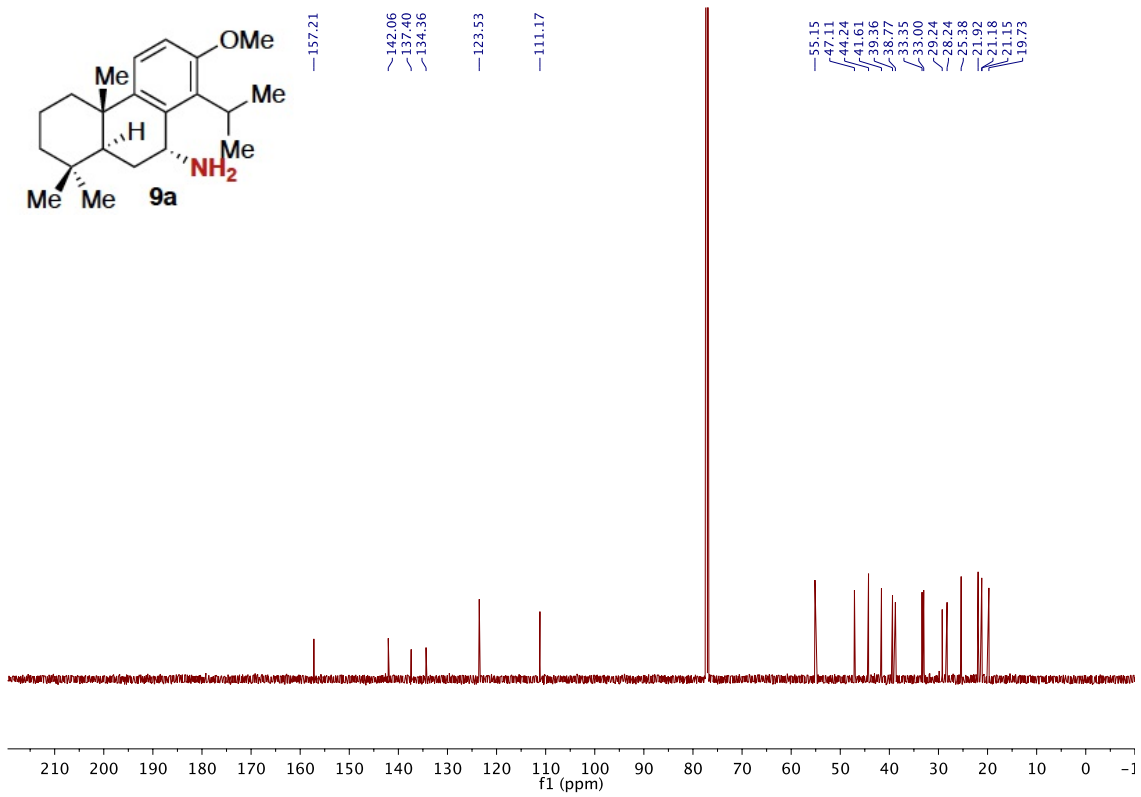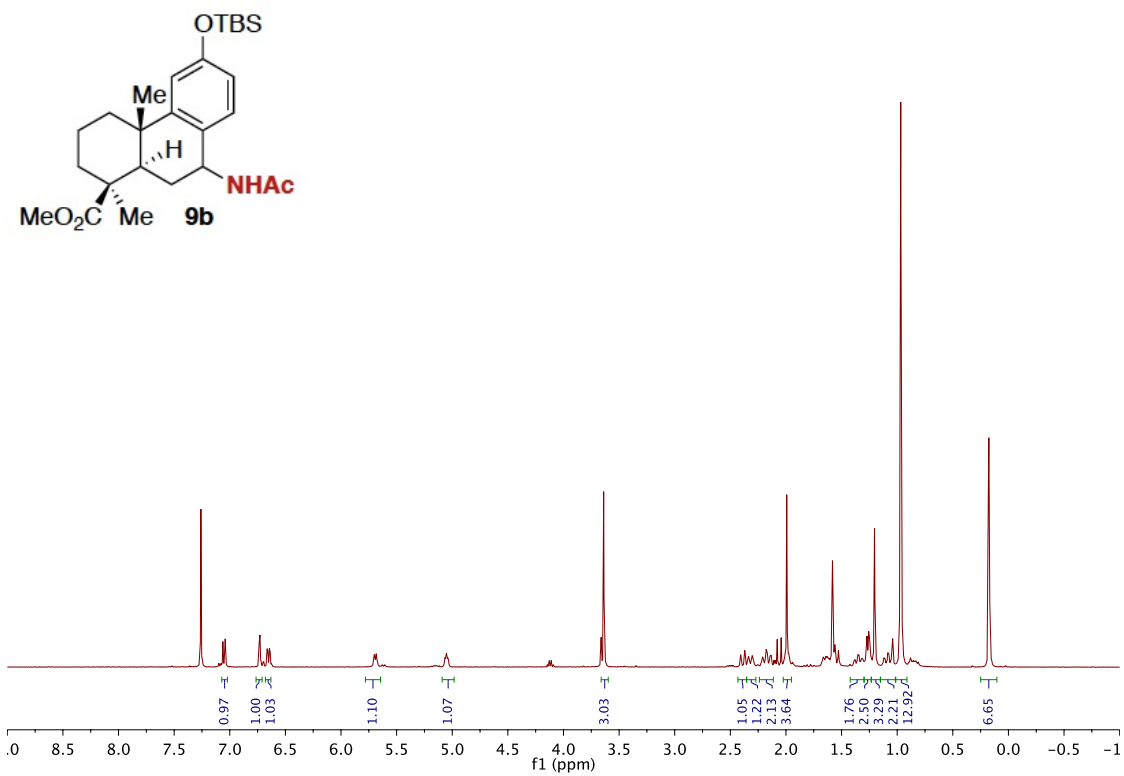

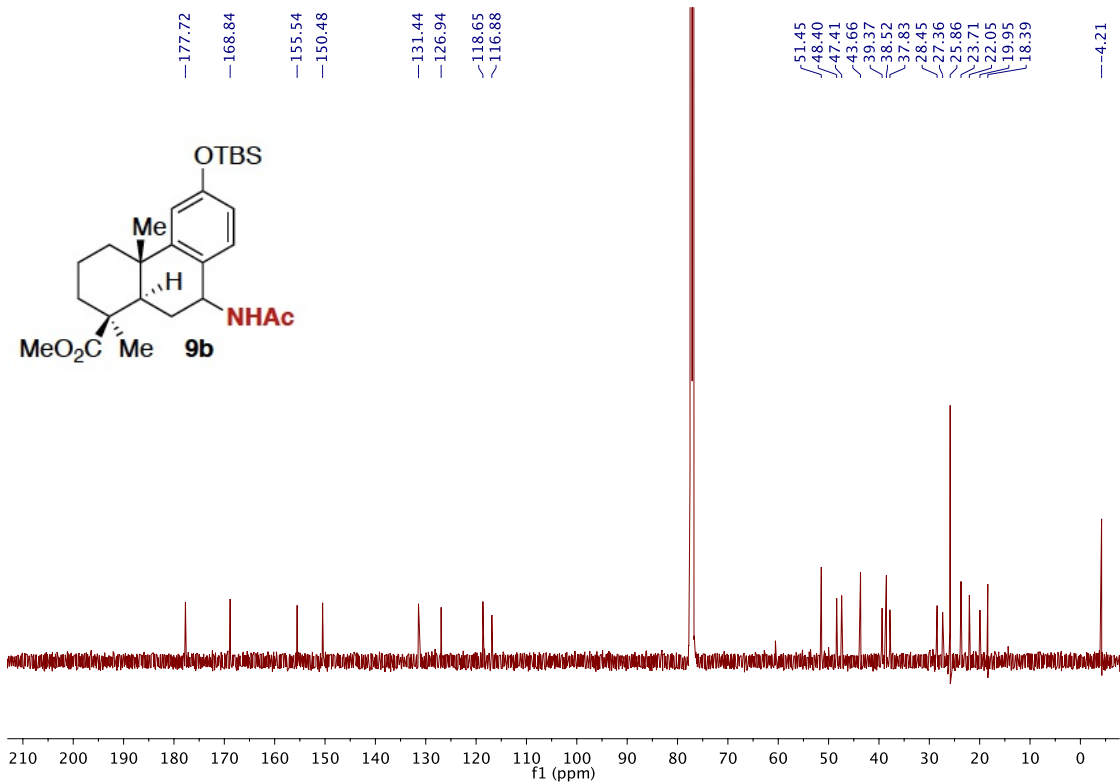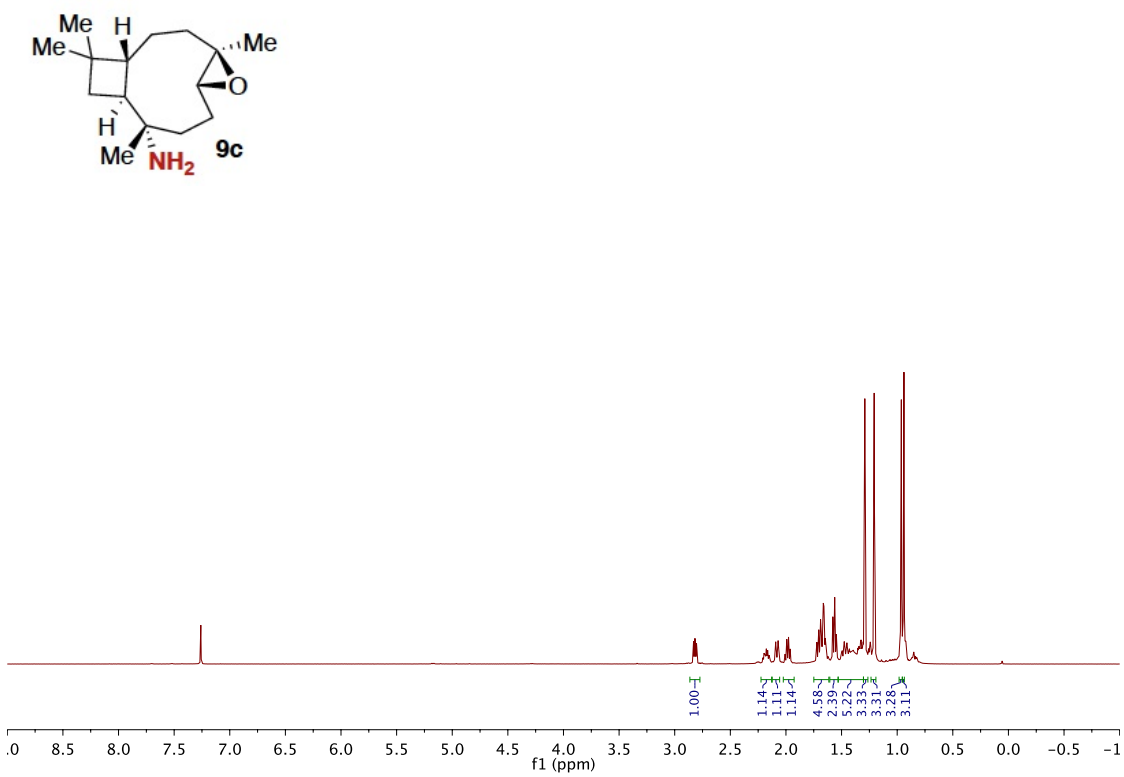

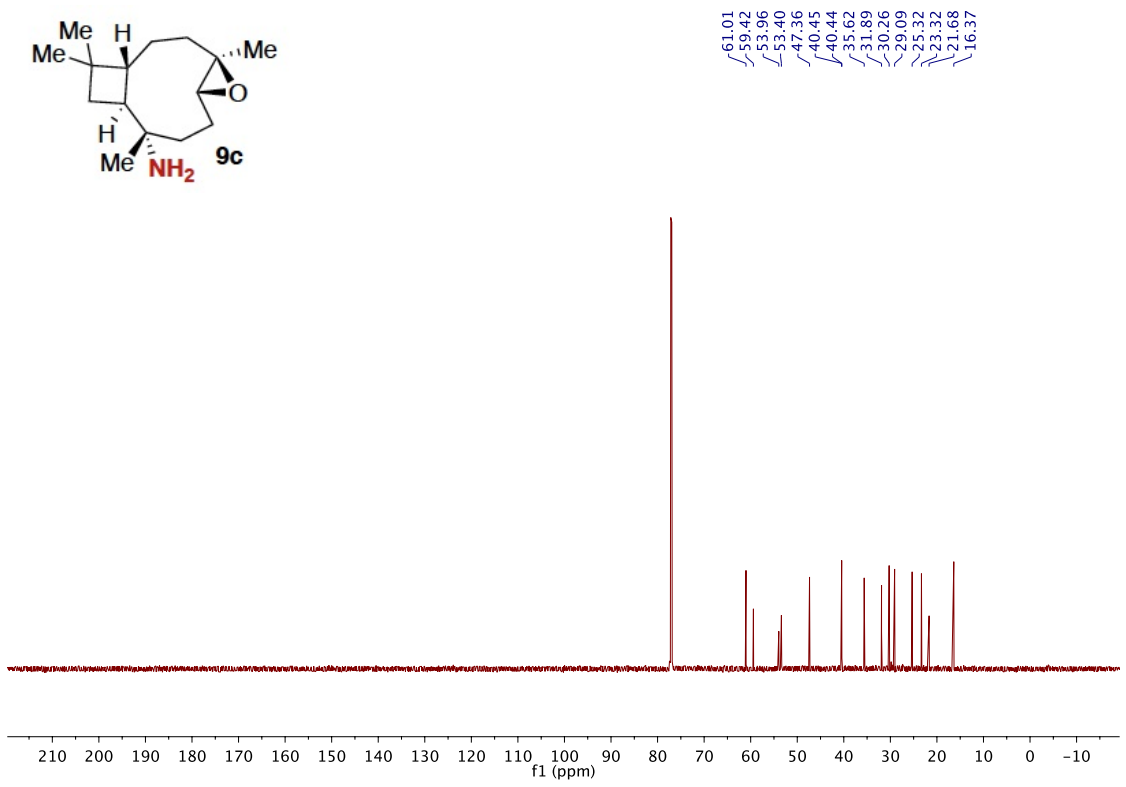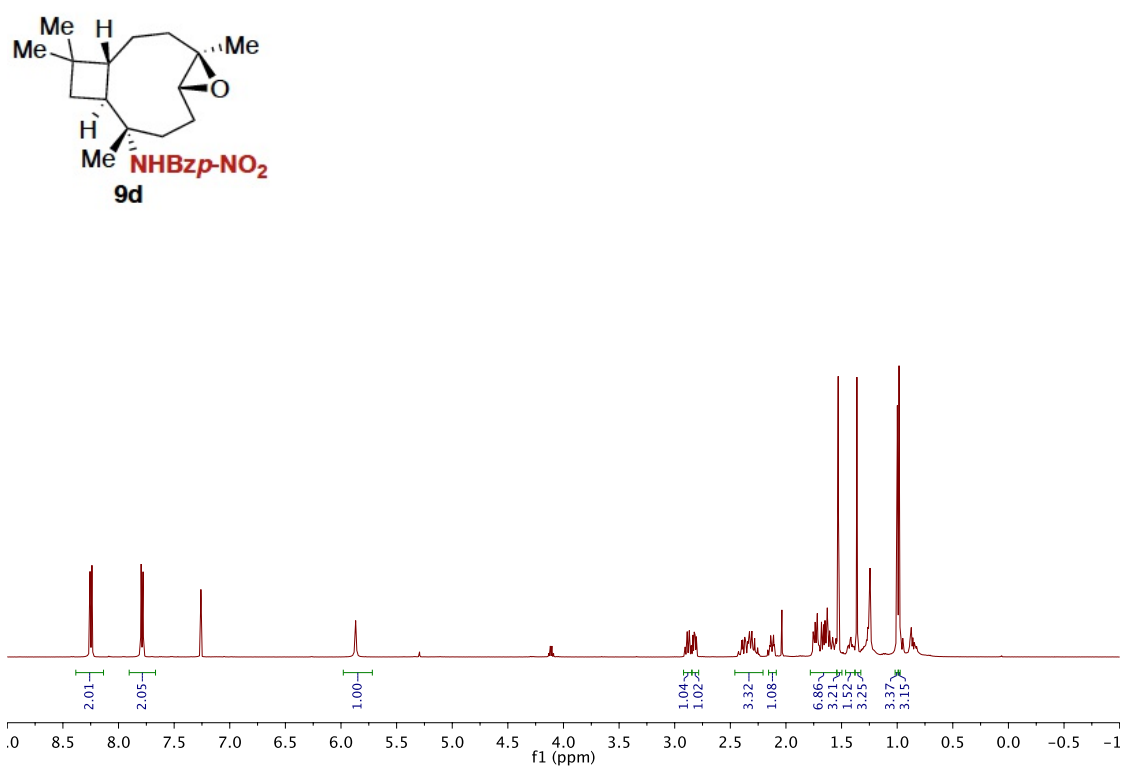

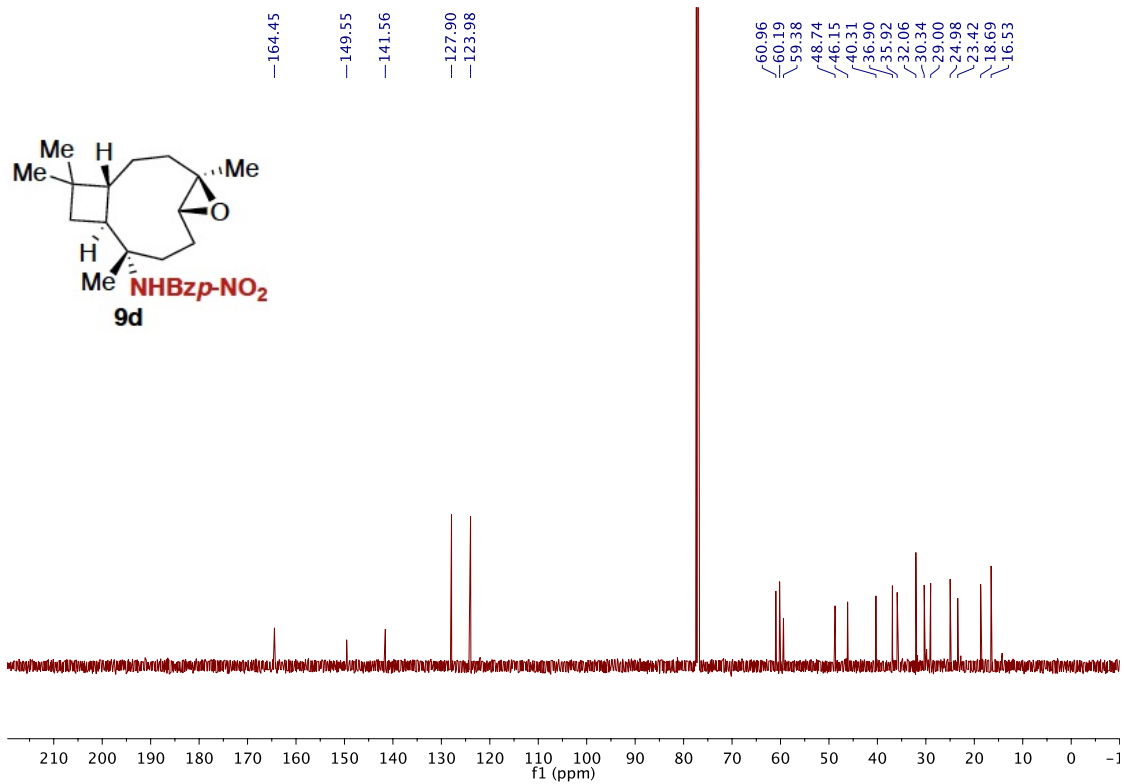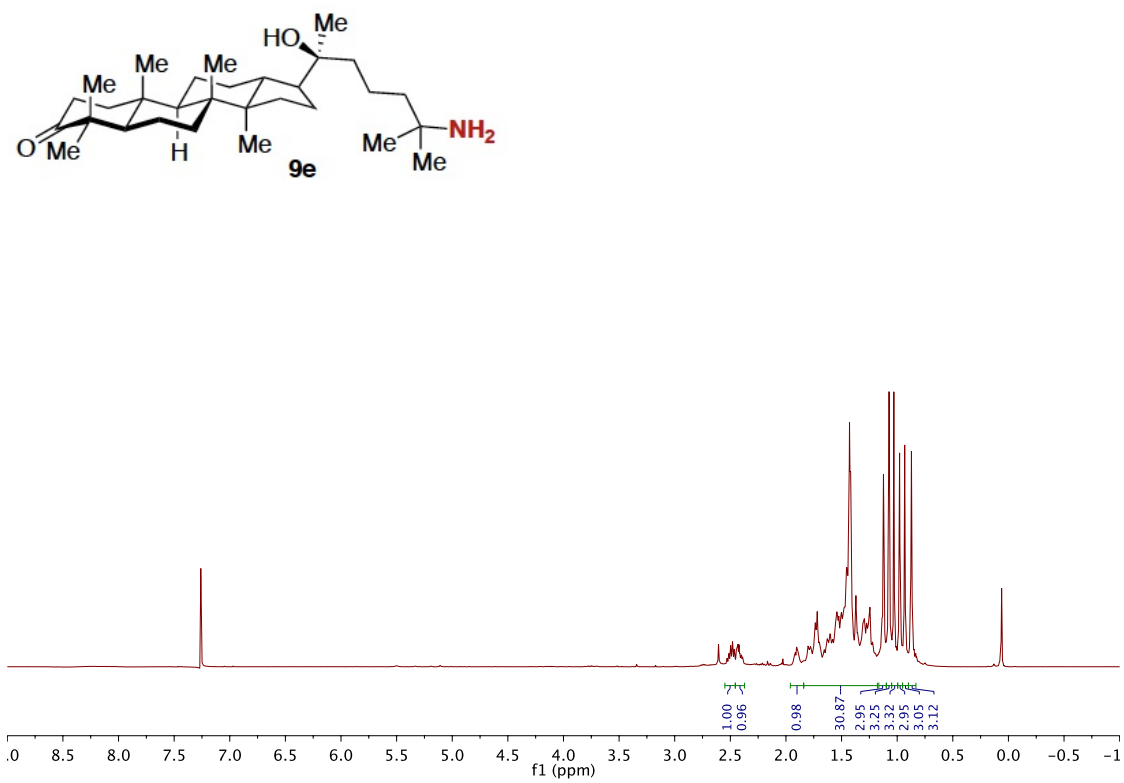

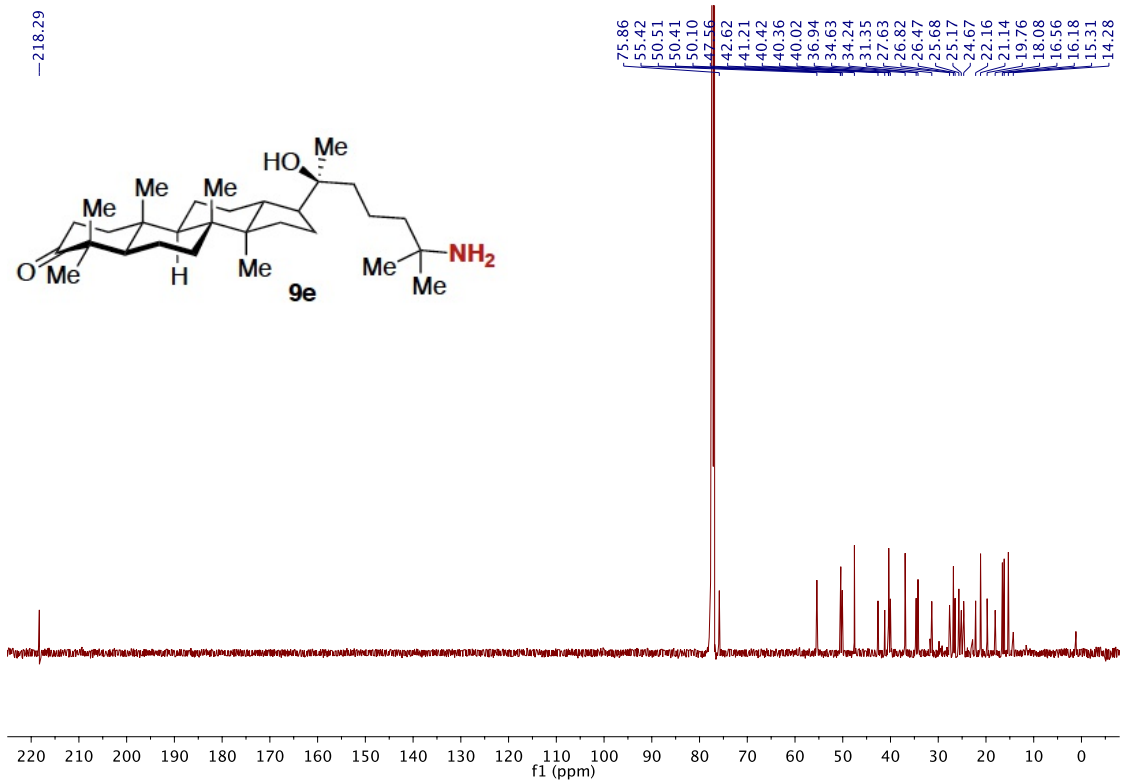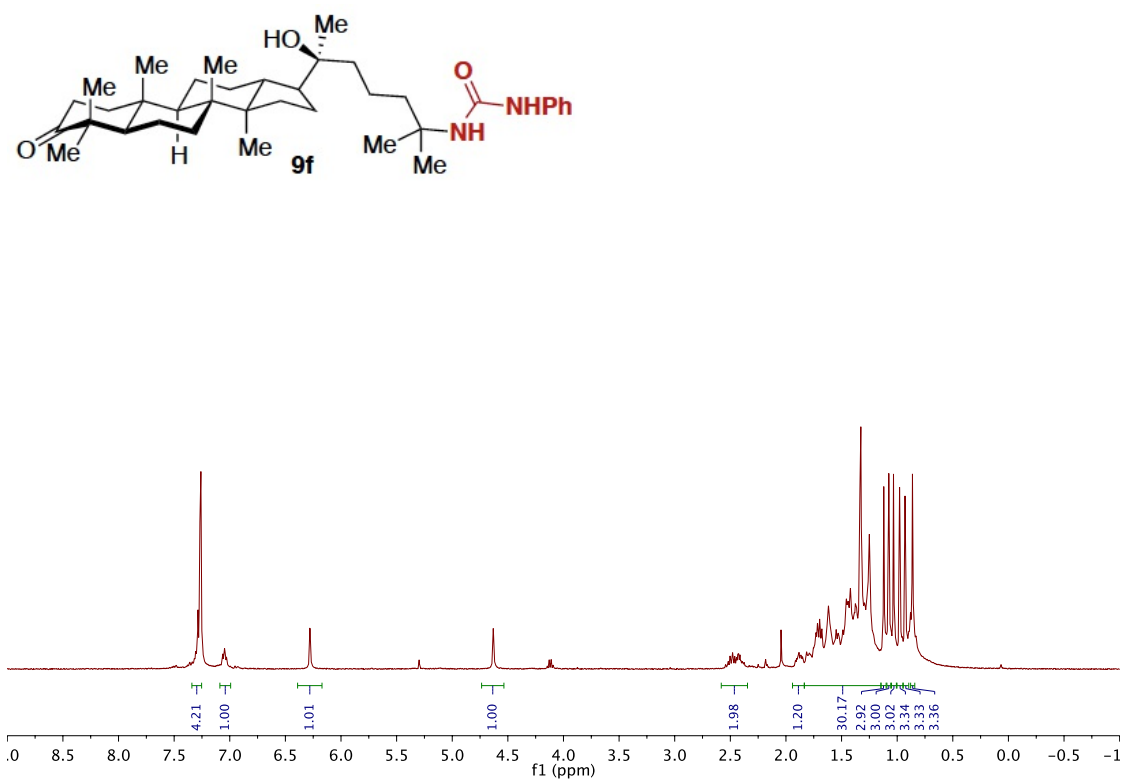

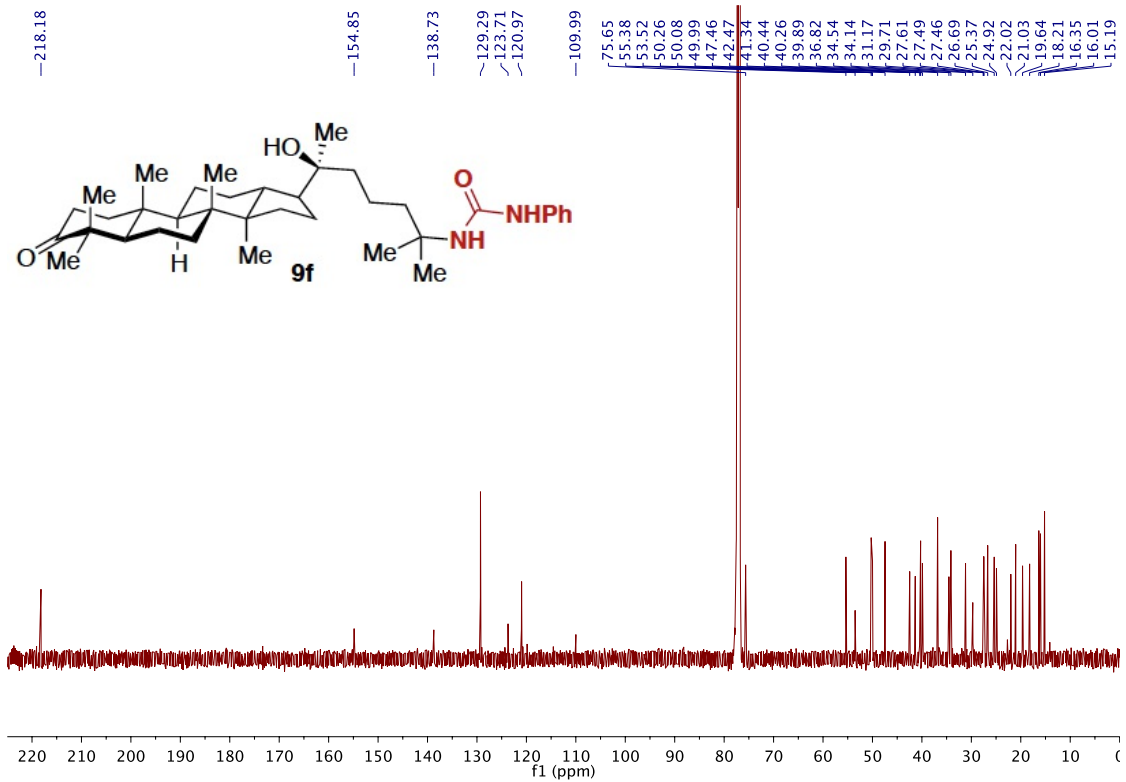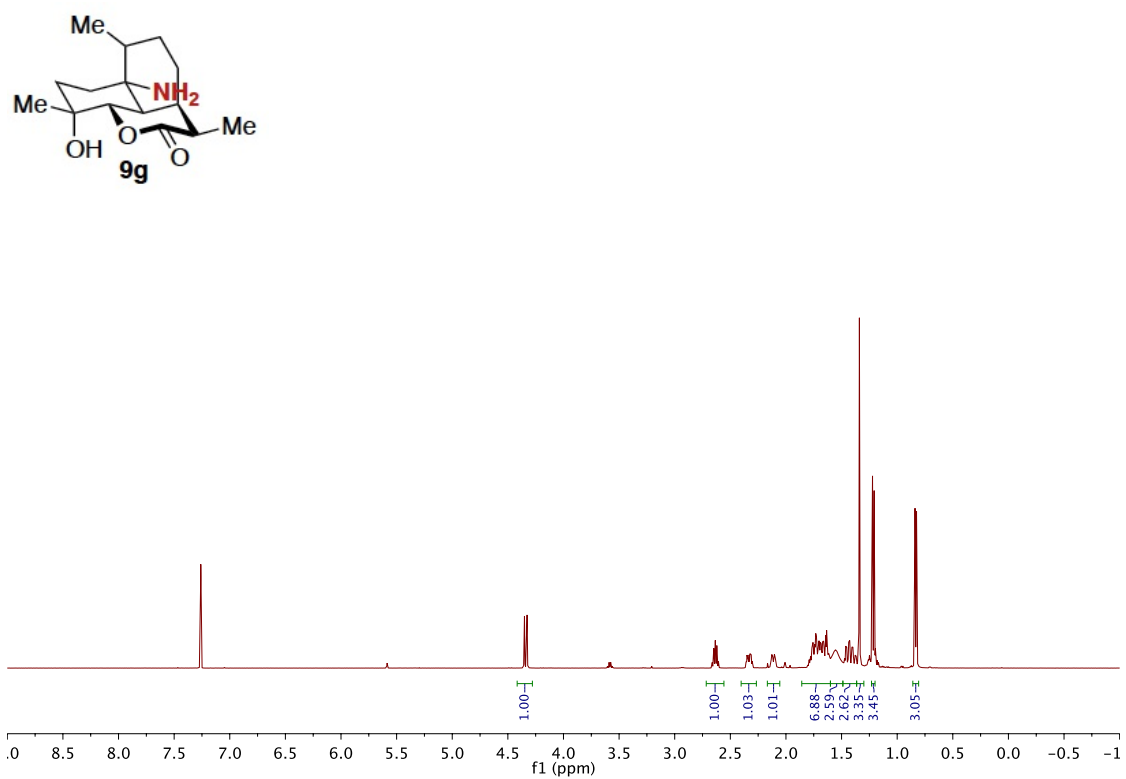



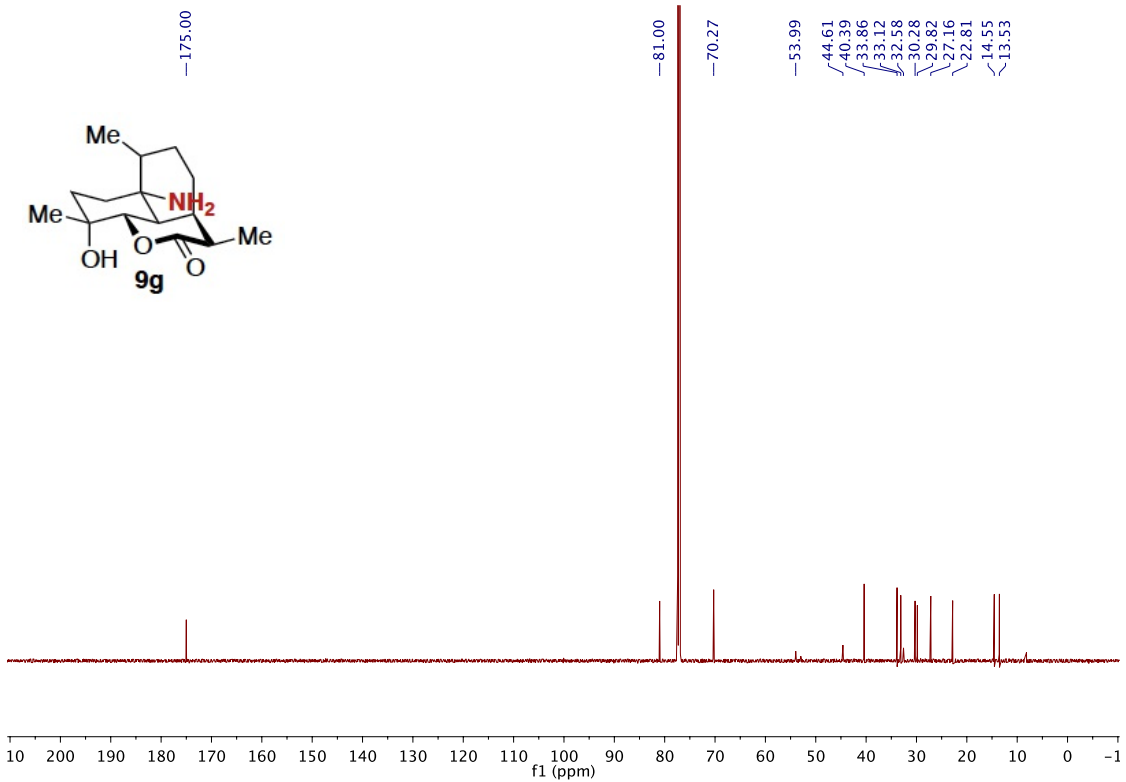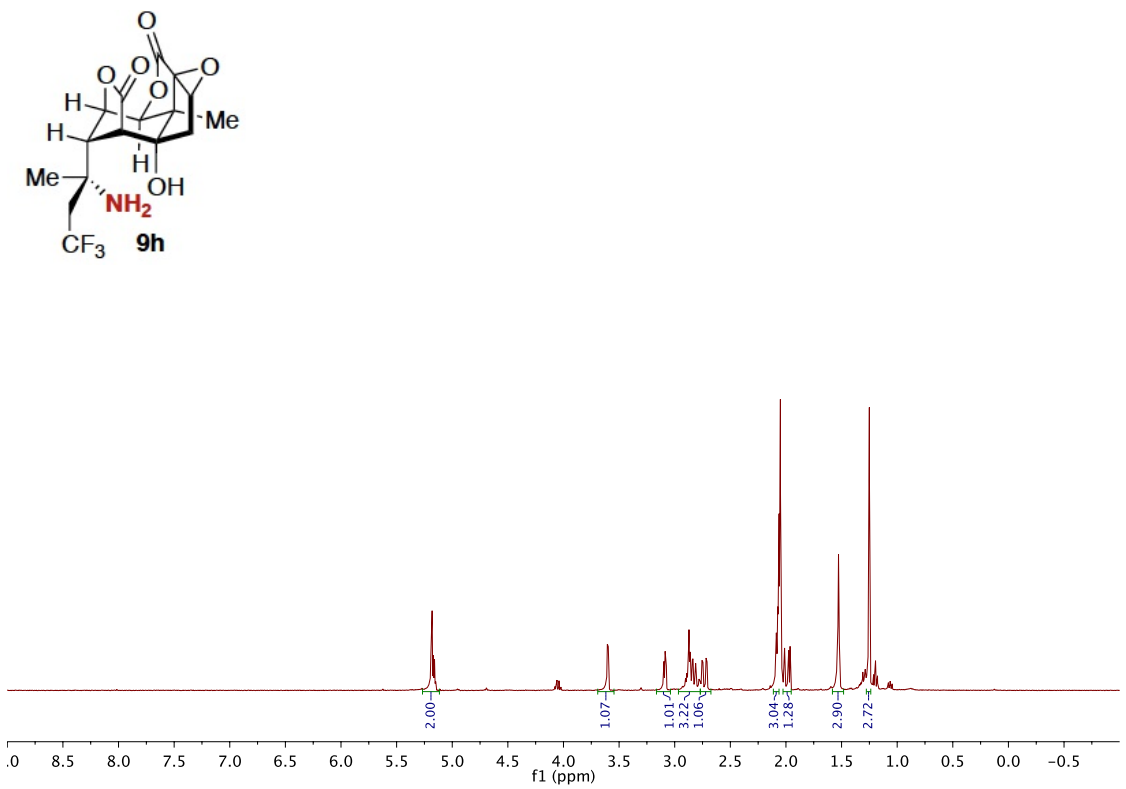

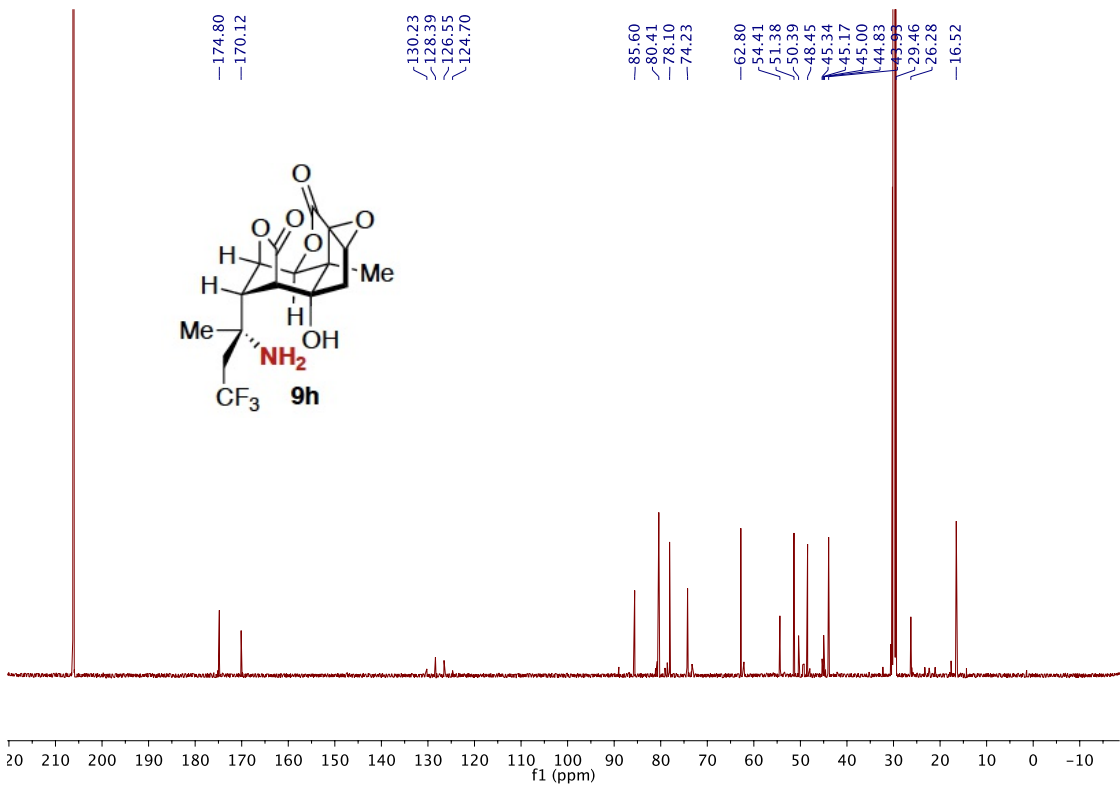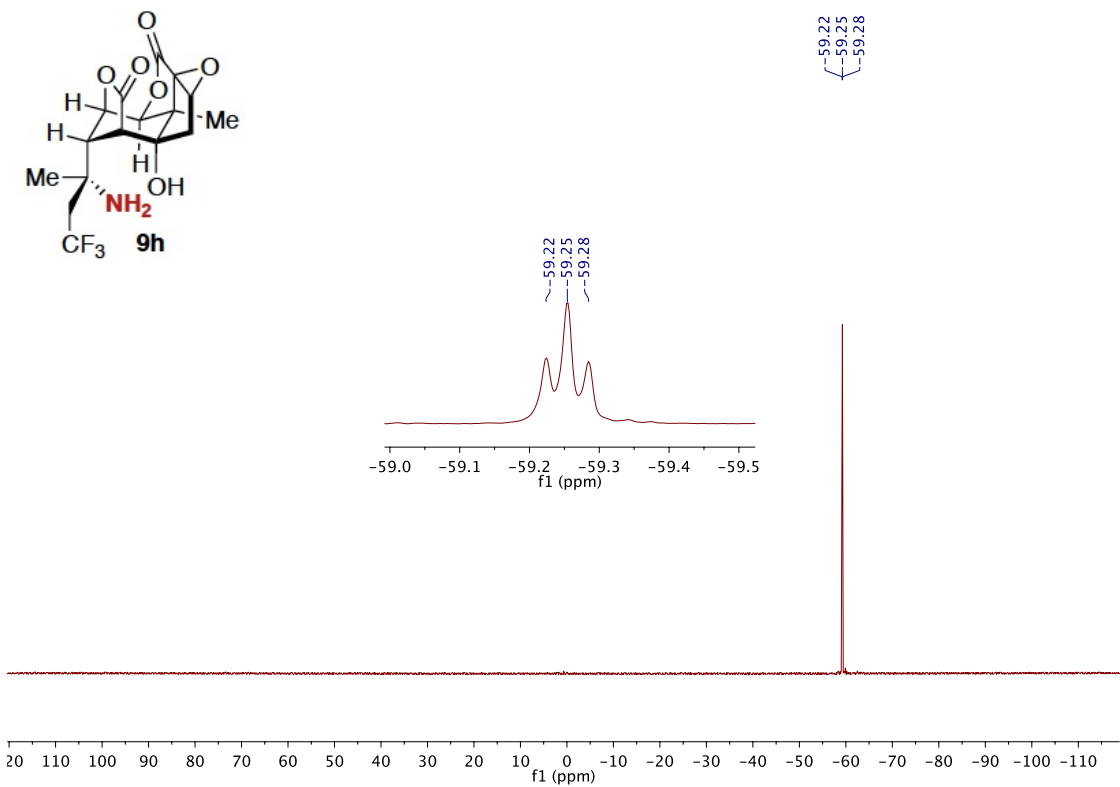

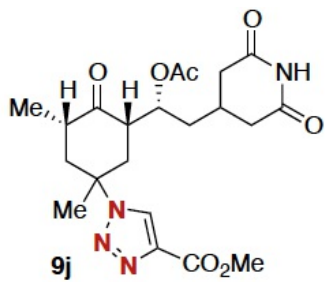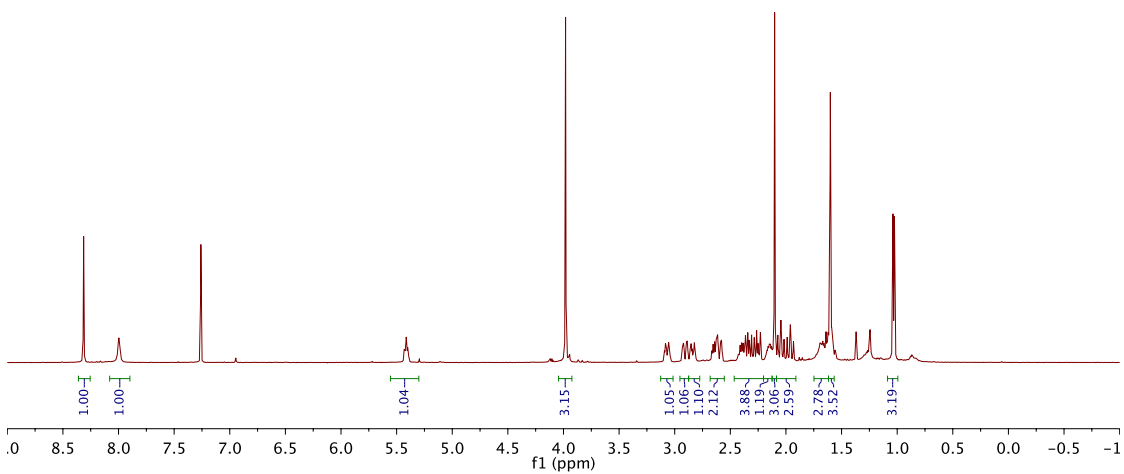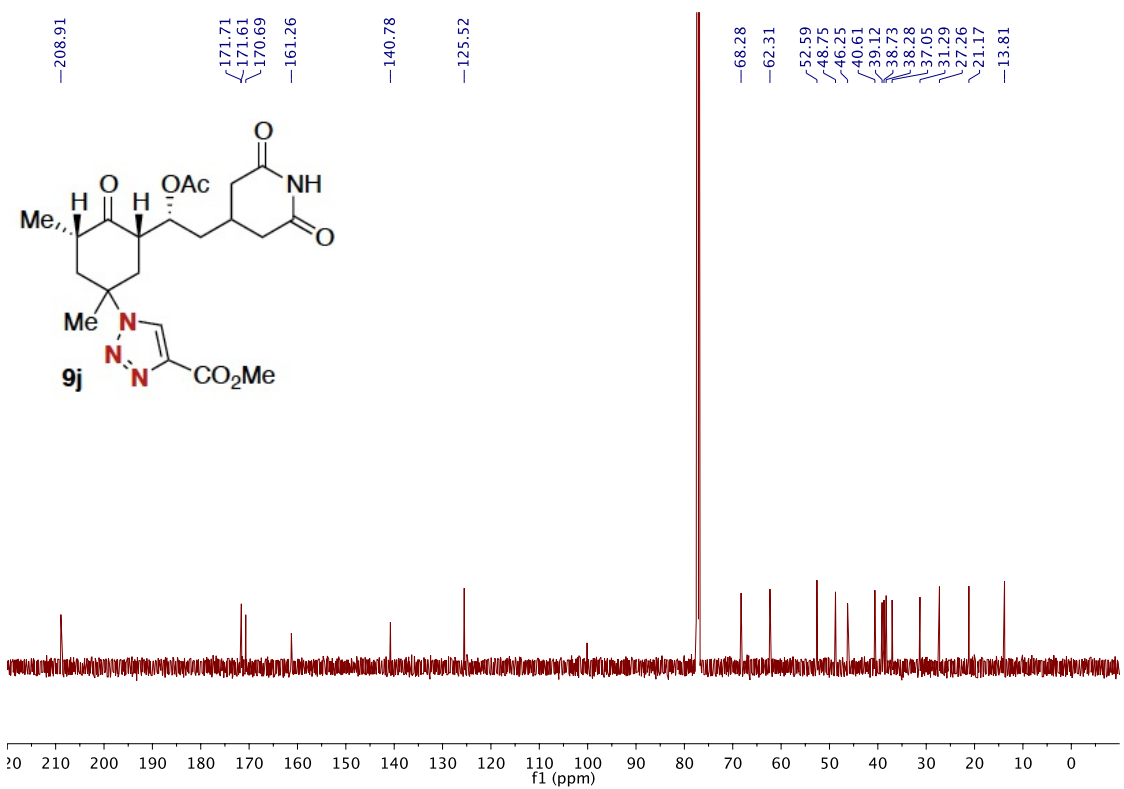

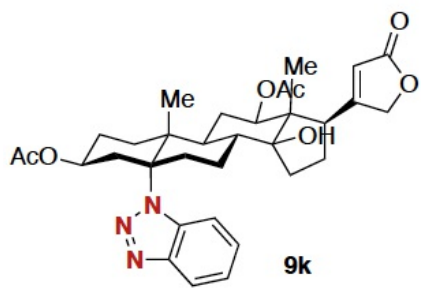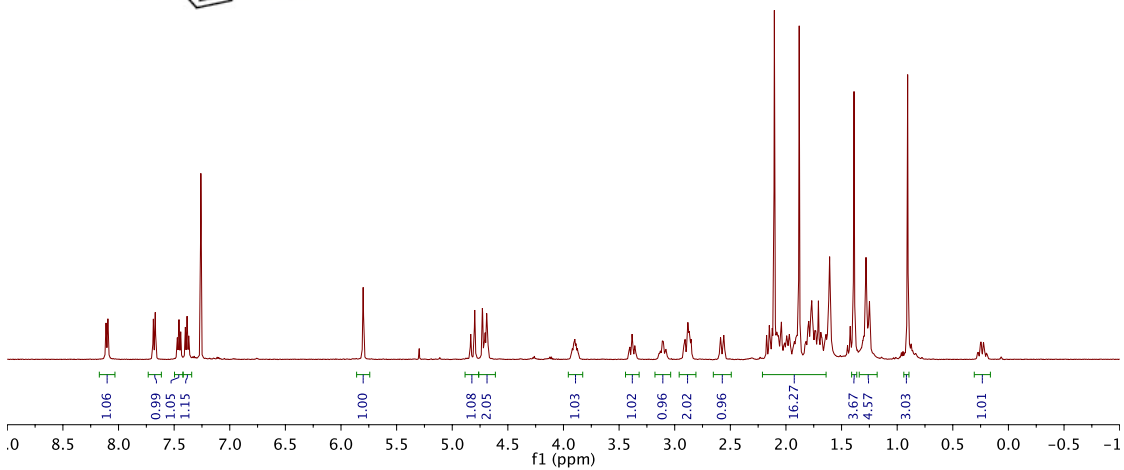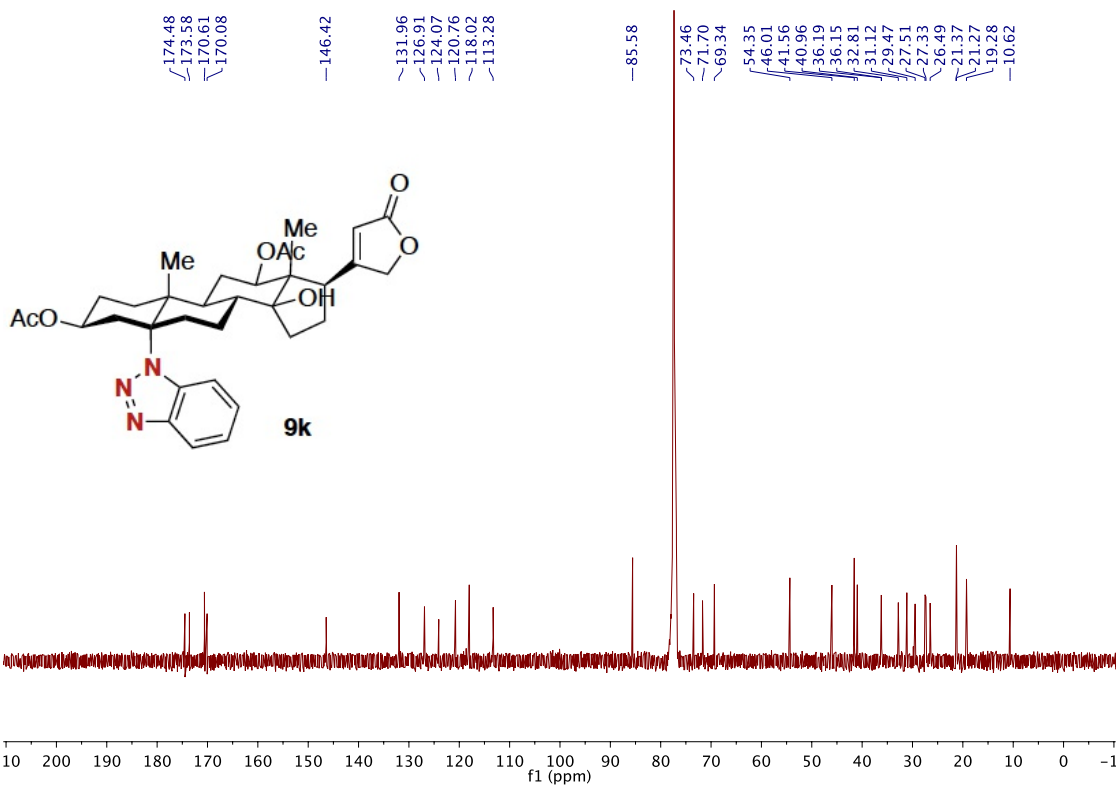

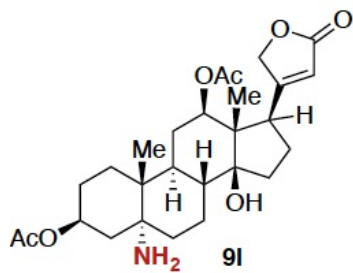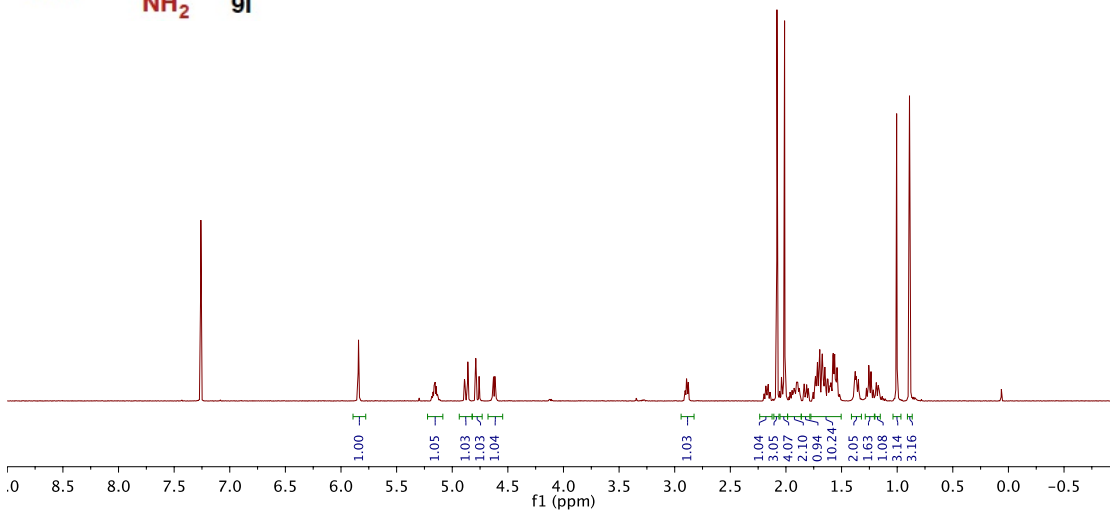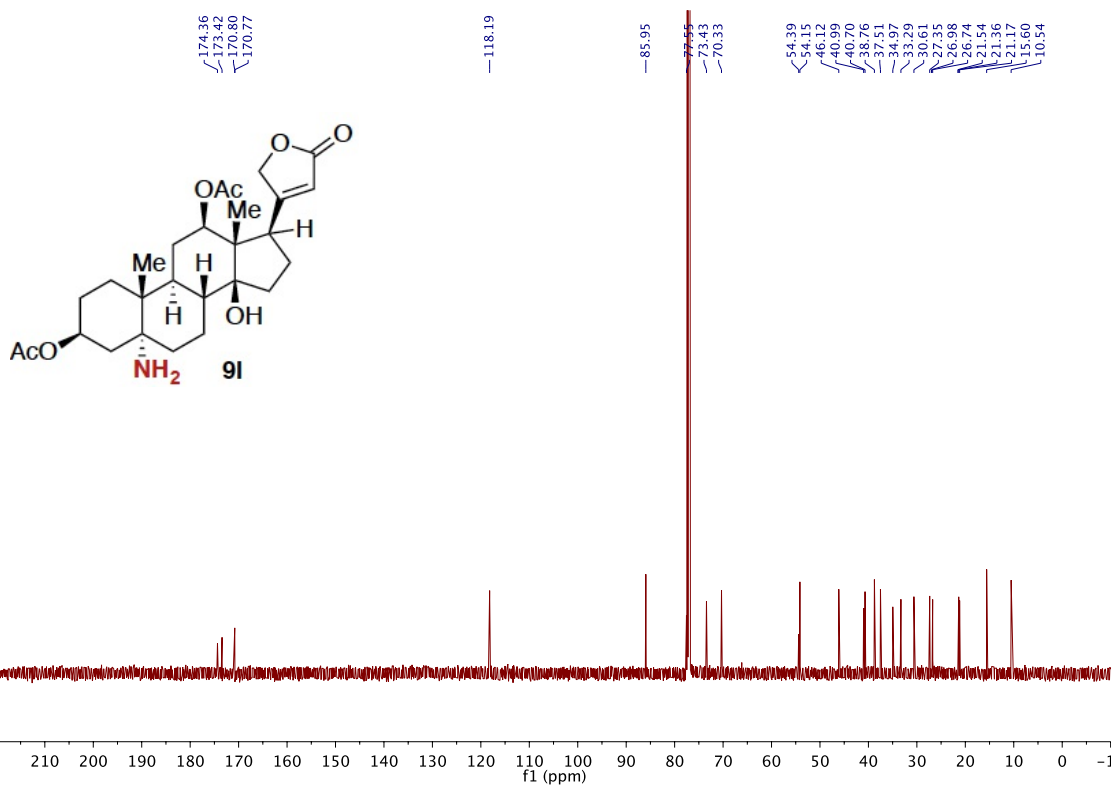

## I. X-ray structures

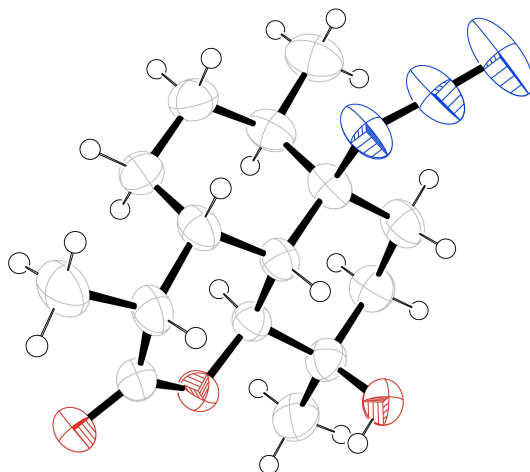

**Figure S6** ORTEP drawing of azide **3f**.

A colorless plate 0.080 x 0.050 x 0.030 mm in size was mounted on a Cryoloop with Paratone oil. Data were collected in a nitrogen gas stream at 200(2) K using  $\omega$  scans. Crystal-to-detector distance was 60 mm and exposure time was 2 seconds per frame using a scan width of 2.0°. Data collection was 99.7% complete to 67.000° in  $\theta$ . A total of 12040 reflections were collected covering the indices,  $-12 \leq h \leq 12$ ,  $-7 \leq k \leq 6$ ,  $-14 \leq l \leq 14$ . 2578 reflections were found to be symmetry independent, with an  $R_{\text{int}}$  of 0.0496. Indexing and unit cell refinement indicated a primitive, monoclinic lattice. The space group was found to be P 21 (No. 4). The data were integrated using the Bruker SAINT software program and scaled using the SADABS software program. Solution by iterative methods (SHELXT-2014) produced a complete heavy-atom phasing model consistent with the proposed structure. All non-hydrogen atoms were refined anisotropically by full-matrix least-squares (SHELXL-2014). All hydrogen atoms were placed using a riding model. Their positions were constrained relative to their parent atom using the appropriate HFIX command in SHELXL-2014. Absolute stereochemistry was unambiguously determined to be *R* at C1, C4, C7, C8, C11, and C12, and *S* at C5, respectively.

**Table S1.** Crystal data and structure refinement for azide **3f**.

|                                   |                                                               |                  |
|-----------------------------------|---------------------------------------------------------------|------------------|
| Empirical formula                 | C <sub>15</sub> H <sub>23</sub> N <sub>3</sub> O <sub>3</sub> |                  |
| Formula weight                    | 293.36                                                        |                  |
| Temperature                       | 200(2) K                                                      |                  |
| Wavelength                        | 1.54178 Å                                                     |                  |
| Crystal system                    | Monoclinic                                                    |                  |
| Space group                       | P 21                                                          |                  |
| Unit cell dimensions              | a = 10.1594(5) Å                                              | α = 90°.         |
|                                   | b = 6.5226(3) Å                                               | β = 100.773(3)°. |
|                                   | c = 11.7589(5) Å                                              | γ = 90°.         |
| Volume                            | 765.48(6) Å <sup>3</sup>                                      |                  |
| Z                                 | 2                                                             |                  |
| Density (calculated)              | 1.273 Mg/m <sup>3</sup>                                       |                  |
| Absorption coefficient            | 0.730 mm <sup>-1</sup>                                        |                  |
| F(000)                            | 316                                                           |                  |
| Crystal size                      | 0.080 x 0.050 x 0.030 mm <sup>3</sup>                         |                  |
| Theta range for data collection   | 3.826 to 68.341°.                                             |                  |
| Index ranges                      | -12 ≤ h ≤ 12, -7 ≤ k ≤ 6, -14 ≤ l ≤ 14                        |                  |
| Reflections collected             | 12040                                                         |                  |
| Independent reflections           | 2578 [R(int) = 0.0496]                                        |                  |
| Completeness to theta = 67.000°   | 99.7 %                                                        |                  |
| Absorption correction             | Semi-empirical from equivalents                               |                  |
| Max. and min. transmission        | 0.929 and 0.725                                               |                  |
| Refinement method                 | Full-matrix least-squares on F <sup>2</sup>                   |                  |
| Data / restraints / parameters    | 2578 / 1 / 194                                                |                  |
| Goodness-of-fit on F <sup>2</sup> | 1.071                                                         |                  |
| Final R indices [I > 2σ(I)]       | R1 = 0.0480, wR2 = 0.1239                                     |                  |
| R indices (all data)              | R1 = 0.0559, wR2 = 0.1310                                     |                  |
| Absolute structure parameter      | 0.02(18)                                                      |                  |
| Extinction coefficient            | n/a                                                           |                  |
| Largest diff. peak and hole       | 0.187 and -0.150 e.Å <sup>-3</sup>                            |                  |

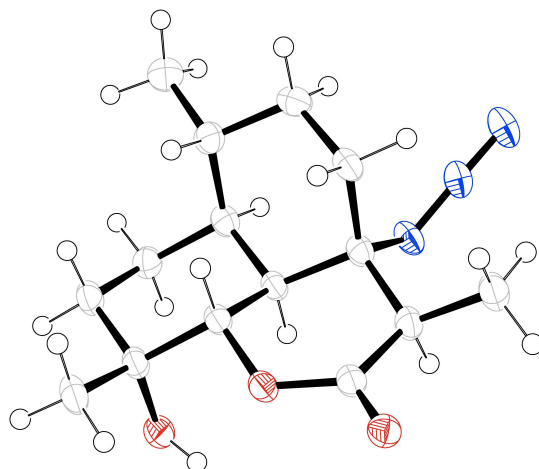

**Figure S7** ORTEP drawing of azide **3g**.

A colorless blade 0.080 x 0.040 x 0.020 mm in size was mounted on a Cryoloop with Paratone oil. Data were collected in a nitrogen gas stream at 100(2) K using and scans. Crystal-to-detector distance was 60 mm and exposure time was 10 seconds per frame using a scan width of 2.0°. Data collection was 99.9% complete to 67.000° in  $\theta$ . A total of 19107 reflections were collected covering the indices,  $-21 \leq h \leq 21$ ,  $-6 \leq k \leq 6$ ,  $-17 \leq l \leq 17$ . 2560 reflections were found to be symmetry independent, with an  $R_{\text{int}}$  of 0.0681. Indexing and unit cell refinement indicated a C-centered, monoclinic lattice. The space group was found to be C 2 (No. 5). The data were integrated using the Bruker SAINT software program and scaled using the SADABS software program. Solution by iterative methods (SHELXT-2014) produced a complete heavy-atom phasing model consistent with the proposed structure. All non-hydrogen atoms were refined anisotropically by full-matrix least-squares (SHELXL-2014). All hydrogen atoms were placed using a riding model. Their positions were constrained relative to their parent atom using the appropriate HFIX command in SHELXL-2014. Absolute stereochemistry was unambiguously determined to be *R* at C4, C8, and C11, and *S* at C1, C5, C9, and C12, respectively.



**Table S2.** Crystal data and structure refinement for azide **3g**.

|                                   |                                             |                             |
|-----------------------------------|---------------------------------------------|-----------------------------|
| Empirical formula                 | C15 H23 N3 O3                               |                             |
| Formula weight                    | 293.36                                      |                             |
| Temperature                       | 100(2) K                                    |                             |
| Wavelength                        | 1.54178 Å                                   |                             |
| Crystal system                    | Monoclinic                                  |                             |
| Space group                       | C 2                                         |                             |
| Unit cell dimensions              | a = 17.681(2) Å                             | $\alpha = 90^\circ$ .       |
|                                   | b = 5.8685(7) Å                             | $\beta = 98.134(8)^\circ$ . |
|                                   | c = 14.2464(19) Å                           | $\gamma = 90^\circ$ .       |
| Volume                            | 1463.4(3) Å <sup>3</sup>                    |                             |
| Z                                 | 4                                           |                             |
| Density (calculated)              | 1.332 Mg/m <sup>3</sup>                     |                             |
| Absorption coefficient            | 0.764 mm <sup>-1</sup>                      |                             |
| F(000)                            | 632                                         |                             |
| Crystal size                      | 0.080 x 0.040 x 0.020 mm <sup>3</sup>       |                             |
| Theta range for data collection   | 3.133 to 68.446°.                           |                             |
| Index ranges                      | -21 ≤ h ≤ 21, -6 ≤ k ≤ 6, -17 ≤ l ≤ 17      |                             |
| Reflections collected             | 19107                                       |                             |
| Independent reflections           | 2560 [R(int) = 0.0681]                      |                             |
| Completeness to theta = 67.000°   | 99.9 %                                      |                             |
| Absorption correction             | Semi-empirical from equivalents             |                             |
| Max. and min. transmission        | 0.929 and 0.748                             |                             |
| Refinement method                 | Full-matrix least-squares on F <sup>2</sup> |                             |
| Data / restraints / parameters    | 2560 / 1 / 194                              |                             |
| Goodness-of-fit on F <sup>2</sup> | 1.063                                       |                             |
| Final R indices [I > 2σ(I)]       | R1 = 0.0433, wR2 = 0.1121                   |                             |
| R indices (all data)              | R1 = 0.0456, wR2 = 0.1151                   |                             |
| Absolute structure parameter      | 0.09(11)                                    |                             |
| Extinction coefficient            | n/a                                         |                             |
| Largest diff. peak and hole       | 0.373 and -0.159 e.Å <sup>-3</sup>          |                             |

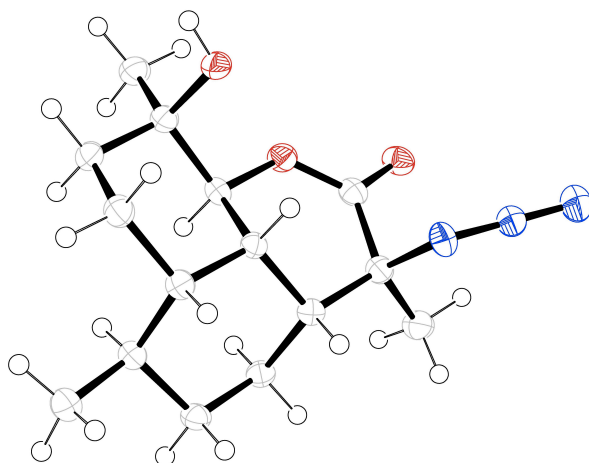

**Figure S8** ORTEP drawing of azide **3h**.

A colorless plate 0.070 x 0.050 x 0.030 mm in size was mounted on a Cryloop with Paratone oil. Data were collected in a nitrogen gas stream at 100(2) K using and scans. Crystal-to-detector distance was 60 mm and exposure time was 5 seconds per frame using a scan width of 2.0°. Data collection was 98.5% complete to 67.000° in  $\theta$ . A total of 34567 reflections were collected covering the indices,  $-7 \leq h \leq 5$ ,  $-12 \leq k \leq 12$ ,  $-27 \leq l \leq 27$ . 2678 reflections were found to be symmetry independent, with an  $R_{\text{int}}$  of 0.0414. Indexing and unit cell refinement indicated a primitive, orthorhombic lattice. The space group was found to be P 21 21 21 (No. 19). The data were integrated using the Bruker SAINT software program and scaled using the SADABS software program. Solution by iterative methods (SHELXT-2014) produced a complete heavy-atom phasing model consistent with the proposed structure. All non-hydrogen atoms were refined anisotropically by full-matrix least-squares (SHELXL-2014). All hydrogen atoms were placed using a riding model. Their positions were constrained relative to their parent atom using the appropriate HFIX command in SHELXL-2014. Absolute stereochemistry was unambiguously determined to be *R* at C2, C5 and C9, and *S* at C1, C6, C10, and C12, respectively.

**Table S3.** Crystal data and structure refinement for azide **3h**.

|                                   |                                             |                       |
|-----------------------------------|---------------------------------------------|-----------------------|
| Empirical formula                 | C15 H23 N3 O3                               |                       |
| Formula weight                    | 293.36                                      |                       |
| Temperature                       | 100(2) K                                    |                       |
| Wavelength                        | 1.54178 Å                                   |                       |
| Crystal system                    | Orthorhombic                                |                       |
| Space group                       | P 21 21 21                                  |                       |
| Unit cell dimensions              | a = 6.1715(3) Å                             | $\alpha = 90^\circ$ . |
|                                   | b = 10.4190(6) Å                            | $\beta = 90^\circ$ .  |
|                                   | c = 22.9681(13) Å                           | $\gamma = 90^\circ$ . |
| Volume                            | 1476.87(14) Å <sup>3</sup>                  |                       |
| Z                                 | 4                                           |                       |
| Density (calculated)              | 1.319 Mg/m <sup>3</sup>                     |                       |
| Absorption coefficient            | 0.757 mm <sup>-1</sup>                      |                       |
| F(000)                            | 632                                         |                       |
| Crystal size                      | 0.070 x 0.050 x 0.030 mm <sup>3</sup>       |                       |
| Theta range for data collection   | 3.849 to 68.240°.                           |                       |
| Index ranges                      | -7<=h<=5, -12<=k<=12, -27<=l<=27            |                       |
| Reflections collected             | 34567                                       |                       |
| Independent reflections           | 2678 [R(int) = 0.0414]                      |                       |
| Completeness to theta = 67.000°   | 98.5 %                                      |                       |
| Absorption correction             | Semi-empirical from equivalents             |                       |
| Max. and min. transmission        | 0.753 and 0.685                             |                       |
| Refinement method                 | Full-matrix least-squares on F <sup>2</sup> |                       |
| Data / restraints / parameters    | 2678 / 0 / 194                              |                       |
| Goodness-of-fit on F <sup>2</sup> | 1.104                                       |                       |
| Final R indices [I>2sigma(I)]     | R1 = 0.0299, wR2 = 0.0825                   |                       |
| R indices (all data)              | R1 = 0.0301, wR2 = 0.0826                   |                       |
| Absolute structure parameter      | 0.05(5)                                     |                       |
| Extinction coefficient            | n/a                                         |                       |
| Largest diff. peak and hole       | 0.231 and -0.154 e.Å <sup>-3</sup>          |                       |

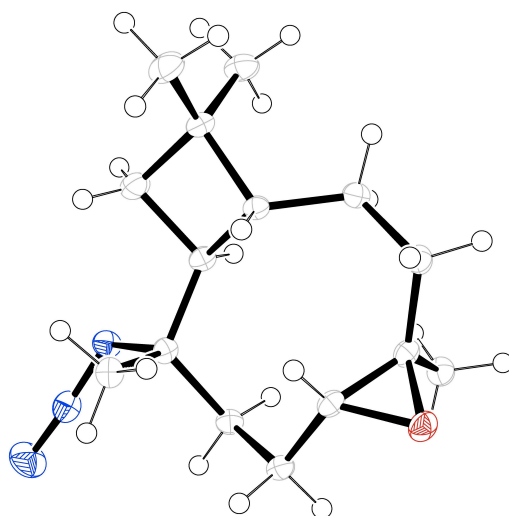

**Figure S9** ORTEP drawing of azide **3i**.

A colorless plate 0.060 x 0.030 x 0.030 mm in size was mounted on a Cryoloop with Paratone oil. Data were collected in a nitrogen gas stream at 100(2) K using and scans. Crystal-to-detector distance was 60 mm and exposure time was 2 seconds per frame using a scan width of 2.0°. Data collection was 100.0% complete to 67.000° in  $\theta$ . A total of 14137 reflections were collected covering the indices,  $-7 \leq h \leq 5$ ,  $-16 \leq k \leq 16$ ,  $-22 \leq l \leq 22$ . 2693 reflections were found to be symmetry independent, with an  $R_{\text{int}}$  of 0.0473. Indexing and unit cell refinement indicated a primitive, orthorhombic lattice. The space group was found to be P 21 21 21 (No. 19). The data were integrated using the Bruker SAINT software program and scaled using the SADABS software program. Solution by iterative methods (SHELXT-2014) produced a complete heavy-atom phasing model consistent with the proposed structure. All non-hydrogen atoms were refined anisotropically by full-matrix least-squares (SHELXL-2014). All hydrogen atoms were placed using a riding model. Their positions were constrained relative to their parent atom using the appropriate HFIX command in SHELXL-2014. Absolute stereochemistry was unambiguously determined to be *R* at CC5, C8, and C9, and *S* at C1 and C2, respectively.

**Table S4.** Crystal data and structure refinement for azide **3i**.

|                                   |                                                  |          |
|-----------------------------------|--------------------------------------------------|----------|
| Empirical formula                 | C <sub>15</sub> H <sub>25</sub> N <sub>3</sub> O |          |
| Formula weight                    | 263.38                                           |          |
| Temperature                       | 100(2) K                                         |          |
| Wavelength                        | 1.54178 Å                                        |          |
| Crystal system                    | Orthorhombic                                     |          |
| Space group                       | P 21 21 21                                       |          |
| Unit cell dimensions              | a = 5.8607(3) Å                                  | α = 90°. |
|                                   | b = 13.4039(7) Å                                 | β = 90°. |
|                                   | c = 18.8487(10) Å                                | γ = 90°. |
| Volume                            | 1480.68(13) Å <sup>3</sup>                       |          |
| Z                                 | 4                                                |          |
| Density (calculated)              | 1.181 Mg/m <sup>3</sup>                          |          |
| Absorption coefficient            | 0.591 mm <sup>-1</sup>                           |          |
| F(000)                            | 576                                              |          |
| Crystal size                      | 0.060 x 0.030 x 0.030 mm <sup>3</sup>            |          |
| Theta range for data collection   | 4.047 to 68.241°.                                |          |
| Index ranges                      | -7 ≤ h ≤ 5, -16 ≤ k ≤ 16, -22 ≤ l ≤ 22           |          |
| Reflections collected             | 14137                                            |          |
| Independent reflections           | 2693 [R(int) = 0.0473]                           |          |
| Completeness to theta = 67.000°   | 100.0 %                                          |          |
| Absorption correction             | Semi-empirical from equivalents                  |          |
| Max. and min. transmission        | 0.929 and 0.828                                  |          |
| Refinement method                 | Full-matrix least-squares on F <sup>2</sup>      |          |
| Data / restraints / parameters    | 2693 / 0 / 176                                   |          |
| Goodness-of-fit on F <sup>2</sup> | 1.060                                            |          |
| Final R indices [I > 2σ(I)]       | R1 = 0.0300, wR2 = 0.0779                        |          |
| R indices (all data)              | R1 = 0.0309, wR2 = 0.0785                        |          |
| Absolute structure parameter      | 0.05(10)                                         |          |
| Extinction coefficient            | n/a                                              |          |
| Largest diff. peak and hole       | 0.184 and -0.148 e.Å <sup>-3</sup>               |          |

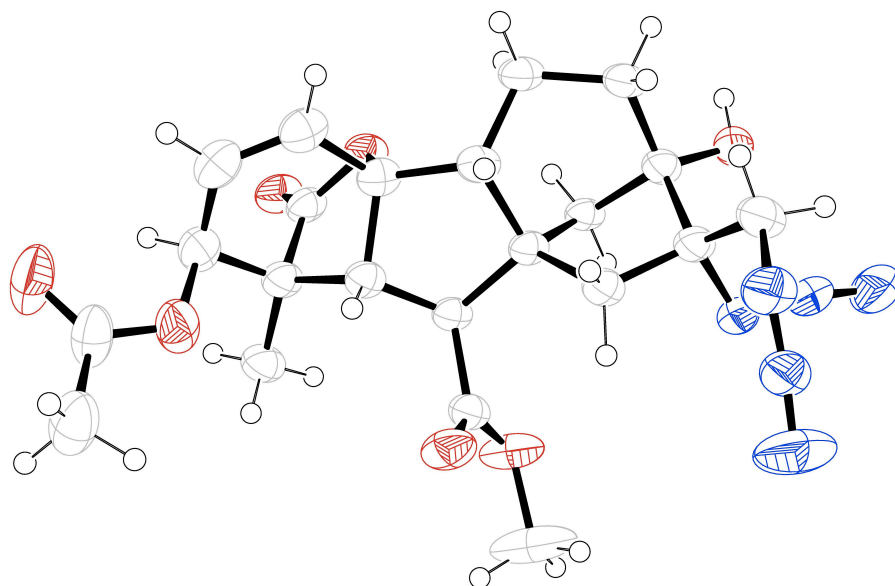

**Figure S10** ORTEP drawing of azide **4c**.

A colorless plate 0.070 x 0.060 x 0.030 mm in size was mounted on a Cryloop with Paratone oil. Data were collected in a nitrogen gas stream at 200(2) K using  $\omega$  scans. Crystal-to-detector distance was 60 mm and exposure time was 1 seconds per frame using a scan width of 2.0°. Data collection was 99.9% complete to 67.000° in  $q$ . A total of 15676 reflections were collected covering the indices,  $-8 \leq h \leq 9$ ,  $-12 \leq k \leq 12$ ,  $-16 \leq l \leq 16$ . 4236 reflections were found to be symmetry independent, with an  $R_{\text{int}}$  of 0.0530. Indexing and unit cell refinement indicated a primitive, monoclinic lattice. The space group was found to be P 21 (No. 4). The data were integrated using the Bruker SAINT software program and scaled using the SADABS software program. Solution by iterative methods (SHELXT-2014) produced a complete heavy-atom phasing model consistent with the proposed structure. All non-hydrogen atoms were refined anisotropically by full-matrix least-squares (SHELXL-2014). All hydrogen atoms were placed using a riding model. Their positions were constrained relative to their parent atom using the appropriate HFIX command in SHELXL-2014. Absolute stereochemistry was unambiguously determined to be *R* at C5, C9, and C10, and *S* at C1, C3, C4, C6, C13, and C16, respectively.

**Table S5.** Crystal data and structure refinement for azide **4c**.

|                                   |                                                               |                    |
|-----------------------------------|---------------------------------------------------------------|--------------------|
| Empirical formula                 | C <sub>22</sub> H <sub>26</sub> N <sub>6</sub> O <sub>7</sub> |                    |
| Formula weight                    | 486.49                                                        |                    |
| Temperature                       | 200(2) K                                                      |                    |
| Wavelength                        | 1.54178 Å                                                     |                    |
| Crystal system                    | Monoclinic                                                    |                    |
| Space group                       | P 21                                                          |                    |
| Unit cell dimensions              | a = 8.1836(2) Å                                               | α = 90°.           |
|                                   | b = 10.5248(2) Å                                              | β = 103.0580(10)°. |
|                                   | c = 13.9957(3) Å                                              | γ = 90°.           |
| Volume                            | 1174.29(4) Å <sup>3</sup>                                     |                    |
| Z                                 | 2                                                             |                    |
| Density (calculated)              | 1.376 Mg/m <sup>3</sup>                                       |                    |
| Absorption coefficient            | 0.879 mm <sup>-1</sup>                                        |                    |
| F(000)                            | 512                                                           |                    |
| Crystal size                      | 0.070 x 0.060 x 0.030 mm <sup>3</sup>                         |                    |
| Theta range for data collection   | 3.241 to 68.381°.                                             |                    |
| Index ranges                      | -8 ≤ h ≤ 9, -12 ≤ k ≤ 12, -16 ≤ l ≤ 16                        |                    |
| Reflections collected             | 15676                                                         |                    |
| Independent reflections           | 4236 [R(int) = 0.0530]                                        |                    |
| Completeness to theta = 67.000°   | 99.9 %                                                        |                    |
| Absorption correction             | Semi-empirical from equivalents                               |                    |
| Max. and min. transmission        | 0.929 and 0.807                                               |                    |
| Refinement method                 | Full-matrix least-squares on F <sup>2</sup>                   |                    |
| Data / restraints / parameters    | 4236 / 3 / 335                                                |                    |
| Goodness-of-fit on F <sup>2</sup> | 1.043                                                         |                    |
| Final R indices [I > 2σ(I)]       | R1 = 0.0387, wR2 = 0.0963                                     |                    |
| R indices (all data)              | R1 = 0.0439, wR2 = 0.1005                                     |                    |
| Absolute structure parameter      | 0.11(13)                                                      |                    |
| Extinction coefficient            | n/a                                                           |                    |
| Largest diff. peak and hole       | 0.149 and -0.187 e.Å <sup>-3</sup>                            |                    |

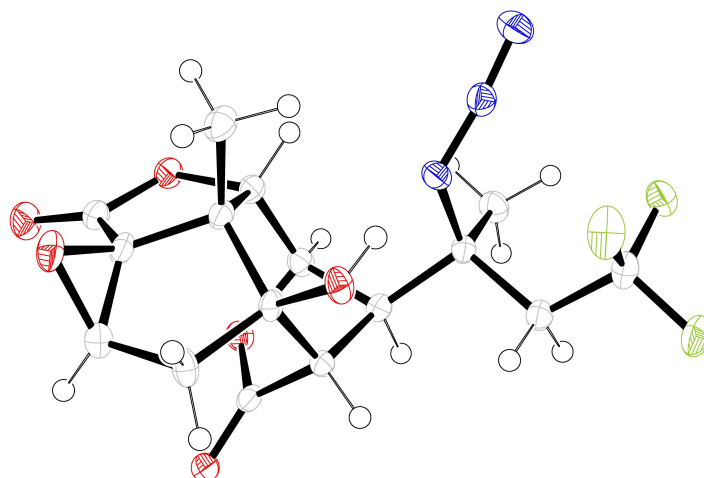

Figure S11 ORTEP drawing of azide **6b**.

A colorless rod 0.060 x 0.030 x 0.020 mm in size was mounted on a Cryoloop with Paratone oil. Data were collected in a nitrogen gas stream at 100(2) K using  $\omega$  scans. Crystal-to-detector distance was 60 mm and exposure time was 10 seconds per frame using a scan width of 2.0°. Data collection was 100.0% complete to 67.000° in  $\theta$ . A total of 65071 reflections were collected covering the indices,  $-21 \leq h \leq 21$ ,  $-20 \leq k \leq 21$ ,  $-12 \leq l \leq 12$ . 3324 reflections were found to be symmetry independent, with an  $R_{\text{int}}$  of 0.0907. Indexing and unit cell refinement indicated a primitive, hexagonal lattice. The space group was found to be P 61 (No. 169). The data were integrated using the Bruker SAINT software program and scaled using the SADABS software program. Solution by iterative methods (SHELXT-2014) produced a complete heavy-atom phasing model consistent with the proposed structure. All non-hydrogen atoms were refined anisotropically by full-matrix least-squares (SHELXL-2014). All hydrogen atoms were placed using a riding model. Their positions were constrained relative to their parent atom using the appropriate HFIX command in SHELXL-2014. Absolute stereochemistry was unambiguously determined to be *R* at C1, C3, C5, C9, and C11, and *S* at C2, C6, C8, and C13, respectively.



**Table S6.** Crystal data and structure refinement for azide **6b**.

|                                   |                                                                              |           |
|-----------------------------------|------------------------------------------------------------------------------|-----------|
| Empirical formula                 | C <sub>16</sub> H <sub>16</sub> F <sub>3</sub> N <sub>3</sub> O <sub>6</sub> |           |
| Formula weight                    | 403.32                                                                       |           |
| Temperature                       | 100(2) K                                                                     |           |
| Wavelength                        | 1.54178 Å                                                                    |           |
| Crystal system                    | Hexagonal                                                                    |           |
| Space group                       | P 61                                                                         |           |
| Unit cell dimensions              | a = 17.5978(5) Å                                                             | α = 90°.  |
|                                   | b = 17.5978(5) Å                                                             | β = 90°.  |
|                                   | c = 10.1363(4) Å                                                             | γ = 120°. |
| Volume                            | 2718.48(19) Å <sup>3</sup>                                                   |           |
| Z                                 | 6                                                                            |           |
| Density (calculated)              | 1.478 Mg/m <sup>3</sup>                                                      |           |
| Absorption coefficient            | 1.167 mm <sup>-1</sup>                                                       |           |
| F(000)                            | 1248                                                                         |           |
| Crystal size                      | 0.060 x 0.030 x 0.020 mm <sup>3</sup>                                        |           |
| Theta range for data collection   | 2.899 to 68.250°.                                                            |           |
| Index ranges                      | -21 ≤ h ≤ 21, -20 ≤ k ≤ 21, -12 ≤ l ≤ 12                                     |           |
| Reflections collected             | 65071                                                                        |           |
| Independent reflections           | 3324 [R(int) = 0.0907]                                                       |           |
| Completeness to theta = 67.000°   | 100.0 %                                                                      |           |
| Absorption correction             | Semi-empirical from equivalents                                              |           |
| Max. and min. transmission        | 0.929 and 0.788                                                              |           |
| Refinement method                 | Full-matrix least-squares on F <sup>2</sup>                                  |           |
| Data / restraints / parameters    | 3324 / 1 / 256                                                               |           |
| Goodness-of-fit on F <sup>2</sup> | 1.170                                                                        |           |
| Final R indices [I > 2σ(I)]       | R1 = 0.0453, wR2 = 0.1389                                                    |           |
| R indices (all data)              | R1 = 0.0467, wR2 = 0.1404                                                    |           |
| Absolute structure parameter      | 0.08(6)                                                                      |           |
| Extinction coefficient            | n/a                                                                          |           |
| Largest diff. peak and hole       | 1.188 and -0.237 e.Å <sup>-3</sup>                                           |           |

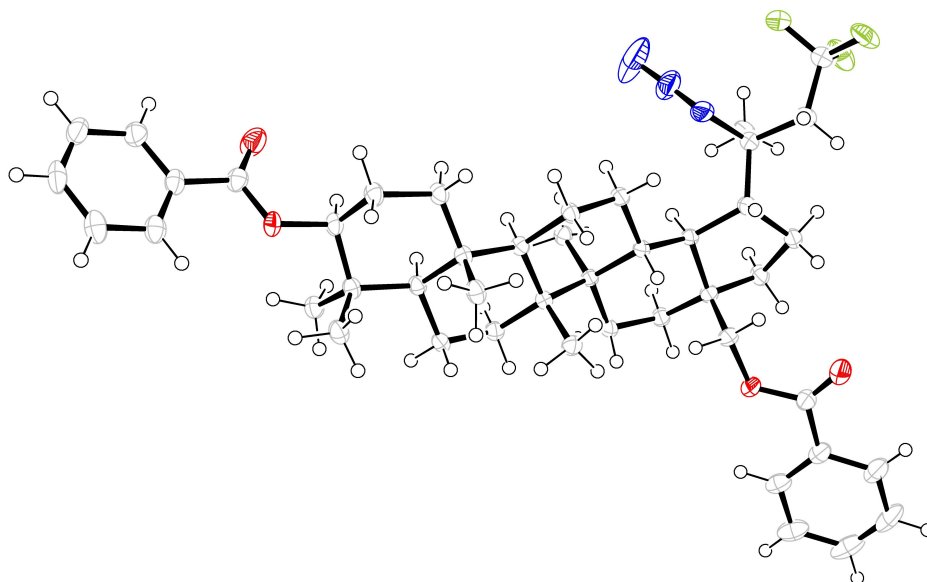

**Figure S12** ORTEP drawing of azide **6c**.

A colorless prism 0.060 x 0.040 x 0.020 mm in size was mounted on a Cryoloop with Paratone oil. Data were collected in a nitrogen gas stream at 100(2) K using and scans. Crystal-to-detector distance was 60 mm and exposure time was 10 seconds per frame using a scan width of 2.0°. Data collection was 100.0% complete to 67.000° in  $\theta$ . A total of 7275 reflections were collected covering the indices,  $-15 \leq h \leq 15$ ,  $-13 \leq k \leq 13$ ,  $-16 \leq l \leq 16$ . 7275 reflections were found to be symmetry independent, with an  $R_{\text{int}}$  of 0.0478. Indexing and unit cell refinement indicated a primitive, monoclinic lattice. The space group was found to be P 21 (No. 4). The data were integrated using the Bruker SAINT software program and scaled using the SADABS software program. Solution by iterative methods (SHELXT-2014) produced a complete heavy-atom phasing model consistent with the proposed structure. All non-hydrogen atoms were refined anisotropically by full-matrix least-squares (SHELXL-2014). All hydrogen atoms were placed using a riding model. Their positions were constrained relative to their parent atom using the appropriate HFIX command in SHELXL-2014. Absolute stereochemistry was unambiguously determined to be *R* at C1, C7, C8, C11, C16, C17, and C20, and *S* at C4, C13, C20, and C21, respectively.

**Table S7.** Crystal data and structure refinement for azide **6c**.

|                                   |                                                                              |                  |
|-----------------------------------|------------------------------------------------------------------------------|------------------|
| Empirical formula                 | C <sub>45</sub> H <sub>58</sub> F <sub>3</sub> N <sub>3</sub> O <sub>4</sub> |                  |
| Formula weight                    | 761.94                                                                       |                  |
| Temperature                       | 100(2) K                                                                     |                  |
| Wavelength                        | 1.54178 Å                                                                    |                  |
| Crystal system                    | Monoclinic                                                                   |                  |
| Space group                       | P 21                                                                         |                  |
| Unit cell dimensions              | a = 12.8744(7) Å                                                             | α = 90°.         |
|                                   | b = 11.4434(7) Å                                                             | β = 107.307(2)°. |
|                                   | c = 13.9437(8) Å                                                             | γ = 90°.         |
| Volume                            | 1961.3(2) Å <sup>3</sup>                                                     |                  |
| Z                                 | 2                                                                            |                  |
| Density (calculated)              | 1.290 Mg/m <sup>3</sup>                                                      |                  |
| Absorption coefficient            | 0.746 mm <sup>-1</sup>                                                       |                  |
| F(000)                            | 816                                                                          |                  |
| Crystal size                      | 0.060 x 0.040 x 0.020 mm <sup>3</sup>                                        |                  |
| Theta range for data collection   | 3.320 to 68.406°.                                                            |                  |
| Index ranges                      | -15 ≤ h ≤ 15, -13 ≤ k ≤ 13, -16 ≤ l ≤ 16                                     |                  |
| Reflections collected             | 7275                                                                         |                  |
| Independent reflections           | 7275 [R(int) = 0.0478]                                                       |                  |
| Completeness to theta = 67.000°   | 100.0 %                                                                      |                  |
| Absorption correction             | Semi-empirical from equivalents                                              |                  |
| Max. and min. transmission        | 0.929 and 0.421                                                              |                  |
| Refinement method                 | Full-matrix least-squares on F <sup>2</sup>                                  |                  |
| Data / restraints / parameters    | 7275 / 1 / 503                                                               |                  |
| Goodness-of-fit on F <sup>2</sup> | 1.039                                                                        |                  |
| Final R indices [I > 2σ(I)]       | R1 = 0.0382, wR2 = 0.1030                                                    |                  |
| R indices (all data)              | R1 = 0.0395, wR2 = 0.1041                                                    |                  |
| Absolute structure parameter      | 0.02(5)                                                                      |                  |
| Extinction coefficient            | n/a                                                                          |                  |
| Largest diff. peak and hole       | 0.396 and -0.288 e.Å <sup>-3</sup>                                           |                  |

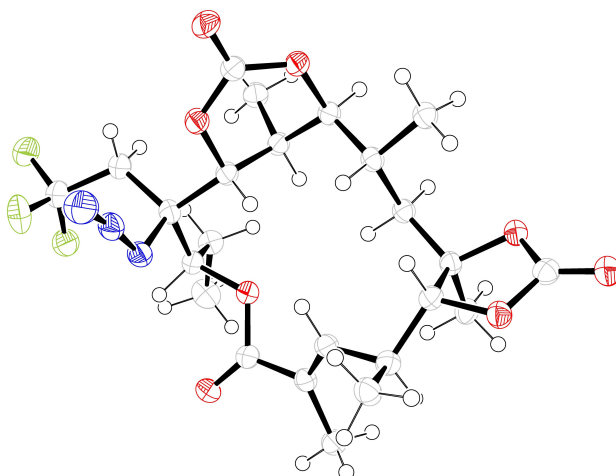

**Figure S13** ORTEP drawing of azide **6e**.

A colorless plate 0.060 x 0.040 x 0.030 mm in size was mounted on a Cryoloop with Paratone oil. Data were collected in a nitrogen gas stream at 100(2) K using and scans. Crystal-to-detector distance was 60 mm and exposure time was 10 seconds per frame using a scan width of 2.0°. Data collection was 99.9% complete to 67.000° in  $\theta$ . A total of 43193 reflections were collected covering the indices,  $-9 \leq h \leq 9$ ,  $-11 \leq k \leq 12$ ,  $-20 \leq l \leq 20$ . 5190 reflections were found to be symmetry independent, with an  $R_{\text{int}}$  of 0.0479. Indexing and unit cell refinement indicated a primitive, monoclinic lattice. The space group was found to be P 21 (No. 4). The data were integrated using the Bruker SAINT software program and scaled using the SADABS software program. Solution by iterative methods (SHELXT-2014) produced a complete heavy-atom phasing model consistent with the proposed structure. All non-hydrogen atoms were refined anisotropically by full-matrix least-squares (SHELXL-2014). All hydrogen atoms were placed using a riding model. Their positions were constrained relative to their parent atom using the appropriate HFIX command in SHELXL-2014. Absolute stereochemistry was unambiguously determined to be *R* at C1, C2, C5, C7, C9, C11, and C16, and *S* at C4 and C12, respectively.

**Table S8.** Crystal data and structure refinement for azide **6e**.

|                                   |                                                                              |                 |
|-----------------------------------|------------------------------------------------------------------------------|-----------------|
| Empirical formula                 | C <sub>27</sub> H <sub>38</sub> F <sub>3</sub> N <sub>3</sub> O <sub>9</sub> |                 |
| Formula weight                    | 605.60                                                                       |                 |
| Temperature                       | 100(2) K                                                                     |                 |
| Wavelength                        | 1.54178 Å                                                                    |                 |
| Crystal system                    | Monoclinic                                                                   |                 |
| Space group                       | P 21                                                                         |                 |
| Unit cell dimensions              | a = 7.9614(5) Å                                                              | α = 90°.        |
|                                   | b = 10.5937(7) Å                                                             | β = 93.179(3)°. |
|                                   | c = 17.3592(11) Å                                                            | γ = 90°.        |
| Volume                            | 1461.83(16) Å <sup>3</sup>                                                   |                 |
| Z                                 | 2                                                                            |                 |
| Density (calculated)              | 1.376 Mg/m <sup>3</sup>                                                      |                 |
| Absorption coefficient            | 0.985 mm <sup>-1</sup>                                                       |                 |
| F(000)                            | 640                                                                          |                 |
| Crystal size                      | 0.060 x 0.040 x 0.030 mm <sup>3</sup>                                        |                 |
| Theta range for data collection   | 2.549 to 68.626°.                                                            |                 |
| Index ranges                      | -9 ≤ h ≤ 9, -11 ≤ k ≤ 12, -20 ≤ l ≤ 20                                       |                 |
| Reflections collected             | 43193                                                                        |                 |
| Independent reflections           | 5190 [R(int) = 0.0479]                                                       |                 |
| Completeness to theta = 67.000°   | 99.9 %                                                                       |                 |
| Absorption correction             | Semi-empirical from equivalents                                              |                 |
| Max. and min. transmission        | 0.929 and 0.754                                                              |                 |
| Refinement method                 | Full-matrix least-squares on F <sup>2</sup>                                  |                 |
| Data / restraints / parameters    | 5190 / 1 / 387                                                               |                 |
| Goodness-of-fit on F <sup>2</sup> | 1.057                                                                        |                 |
| Final R indices [I > 2σ(I)]       | R1 = 0.0386, wR2 = 0.1050                                                    |                 |
| R indices (all data)              | R1 = 0.0394, wR2 = 0.1056                                                    |                 |
| Absolute structure parameter      | 0.04(4)                                                                      |                 |
| Extinction coefficient            | n/a                                                                          |                 |
| Largest diff. peak and hole       | 0.281 and -0.246 e.Å <sup>-3</sup>                                           |                 |

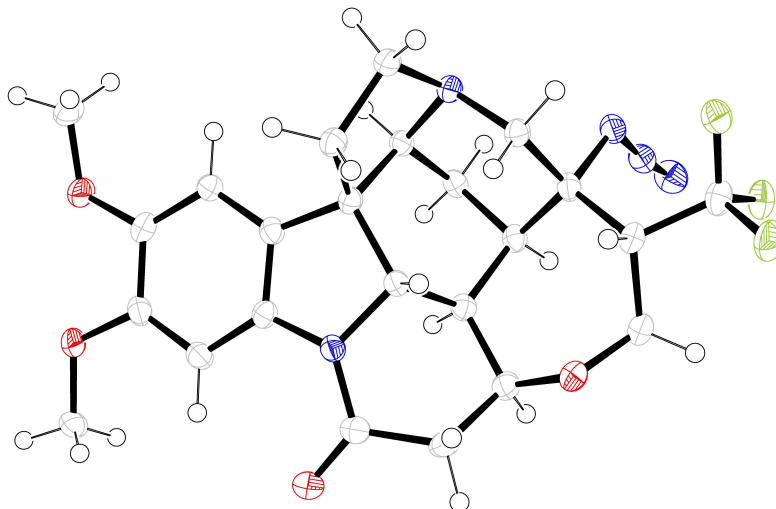

**Figure S14** ORTEP drawing of azide **6f**.

A colorless prism 0.070 x 0.050 x 0.050 mm in size was mounted on a Cryoloop with Paratone oil. Data were collected in a nitrogen gas stream at 100(2) K using and scans. Crystal-to-detector distance was 60 mm and exposure time was 5 seconds per frame using a scan width of 2.0°. Data collection was 98.3% complete to 67.000° in  $\theta$ . A total of 27080 reflections were collected covering the indices,  $-11 \leq h \leq 11$ ,  $-12 \leq k \leq 12$ ,  $-13 \leq l \leq 13$ . 3858 reflections were found to be symmetry independent, with an  $R_{\text{int}}$  of 0.0406. Indexing and unit cell refinement indicated a primitive, monoclinic lattice. The space group was found to be P 21 (No. 4). The data were integrated using the Bruker SAINT software program and scaled using the SADABS software program. Solution by iterative methods (SHELXT-2014) produced a complete heavy-atom phasing model consistent with the proposed structure. All non-hydrogen atoms were refined anisotropically by full-matrix least-squares (SHELXL-2014). All hydrogen atoms were placed using a riding model. Their positions were constrained relative to their parent atom using the appropriate HFIX command in SHELXL-2014. Absolute stereochemistry was unambiguously determined to be *R* at C17 and C21, and *S* at C1, C14, C16, C19, and C20, respectively.

**Table S9.** Crystal data and structure refinement for azide **6f**.

|                                   |                                                                              |                  |
|-----------------------------------|------------------------------------------------------------------------------|------------------|
| Empirical formula                 | C <sub>24</sub> H <sub>26</sub> F <sub>3</sub> N <sub>5</sub> O <sub>4</sub> |                  |
| Formula weight                    | 505.50                                                                       |                  |
| Temperature                       | 100(2) K                                                                     |                  |
| Wavelength                        | 1.54178 Å                                                                    |                  |
| Crystal system                    | Monoclinic                                                                   |                  |
| Space group                       | P 21                                                                         |                  |
| Unit cell dimensions              | a = 9.5910(6) Å                                                              | α = 90°.         |
|                                   | b = 10.1778(6) Å                                                             | β = 102.570(2)°. |
|                                   | c = 11.4314(7) Å                                                             | γ = 90°.         |
| Volume                            | 1089.13(12) Å <sup>3</sup>                                                   |                  |
| Z                                 | 2                                                                            |                  |
| Density (calculated)              | 1.541 Mg/m <sup>3</sup>                                                      |                  |
| Absorption coefficient            | 1.056 mm <sup>-1</sup>                                                       |                  |
| F(000)                            | 528                                                                          |                  |
| Crystal size                      | 0.070 x 0.050 x 0.050 mm <sup>3</sup>                                        |                  |
| Theta range for data collection   | 3.962 to 68.228°.                                                            |                  |
| Index ranges                      | -11 ≤ h ≤ 11, -12 ≤ k ≤ 12, -13 ≤ l ≤ 13                                     |                  |
| Reflections collected             | 27080                                                                        |                  |
| Independent reflections           | 3858 [R(int) = 0.0406]                                                       |                  |
| Completeness to theta = 67.000°   | 98.3 %                                                                       |                  |
| Absorption correction             | Semi-empirical from equivalents                                              |                  |
| Max. and min. transmission        | 0.929 and 0.857                                                              |                  |
| Refinement method                 | Full-matrix least-squares on F <sup>2</sup>                                  |                  |
| Data / restraints / parameters    | 3858 / 1 / 327                                                               |                  |
| Goodness-of-fit on F <sup>2</sup> | 1.034                                                                        |                  |
| Final R indices [I > 2σ(I)]       | R1 = 0.0291, wR2 = 0.0766                                                    |                  |
| R indices (all data)              | R1 = 0.0291, wR2 = 0.0767                                                    |                  |
| Absolute structure parameter      | 0.09(3)                                                                      |                  |
| Extinction coefficient            | n/a                                                                          |                  |
| Largest diff. peak and hole       | 0.250 and -0.193 e.Å <sup>-3</sup>                                           |                  |
